# Supplementary material
Source: MDPI journal article supplement (https://www.mdpi.com/2076-3417/12/18/8954)
Supplement: s1 [file s1]

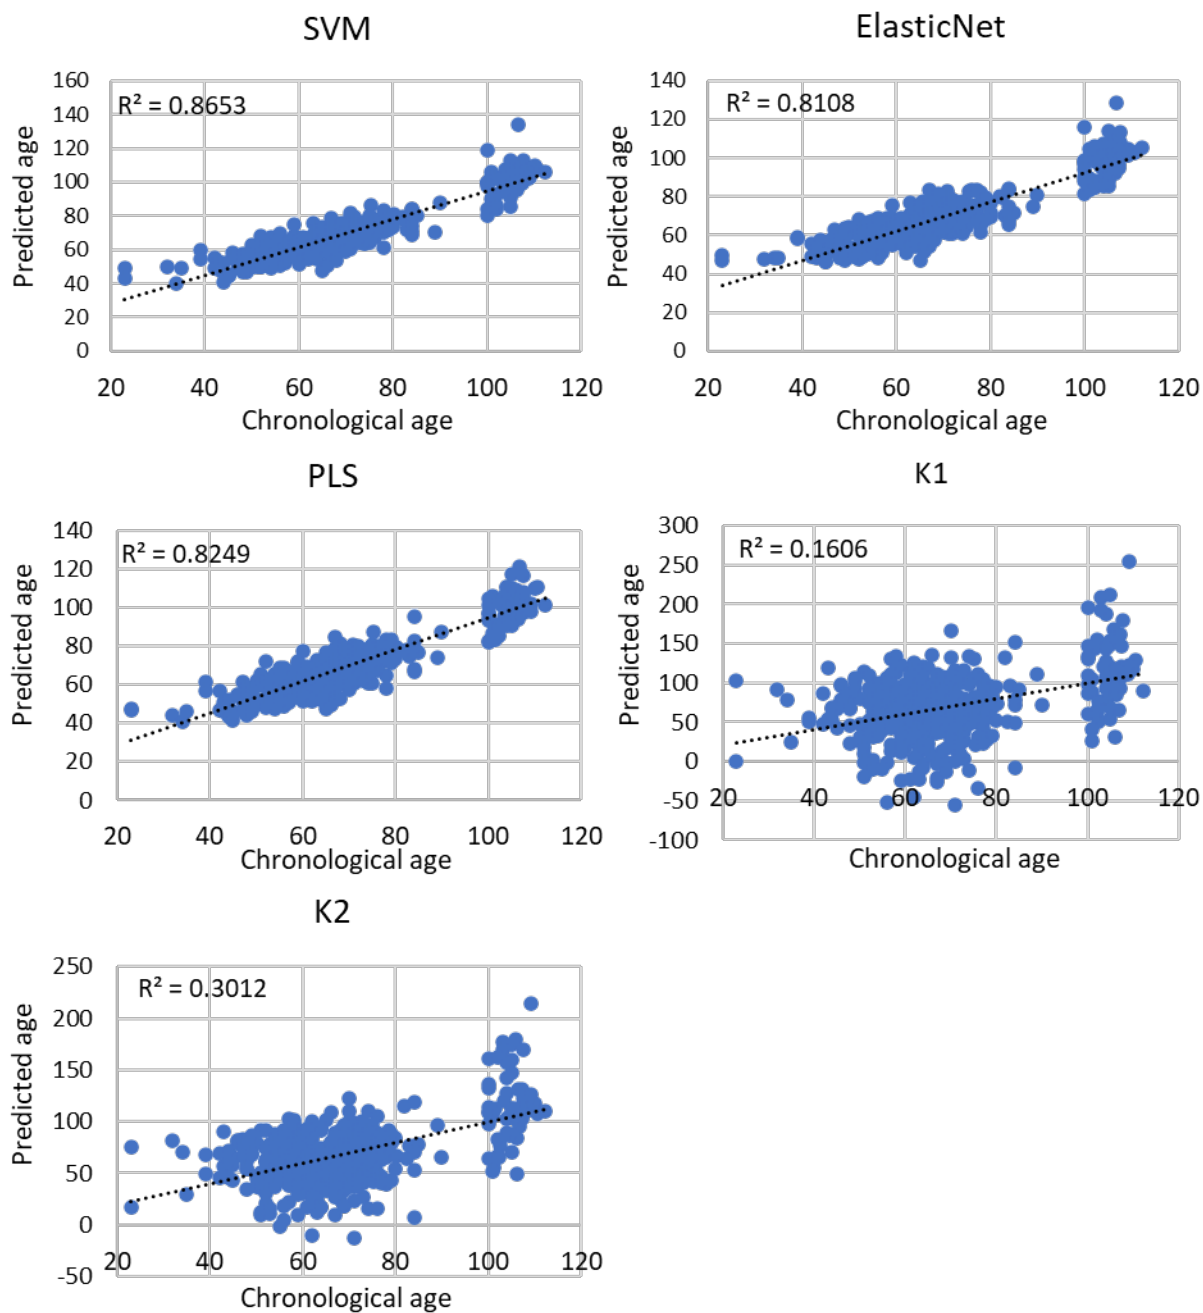

**Supplementary Figure S1.** Chronological age versus predicted age for the SVM, PLS, ElasticNet and the the Klemeera-Doubal (K1 and K2) models built on binned spectra of CTR subjects.

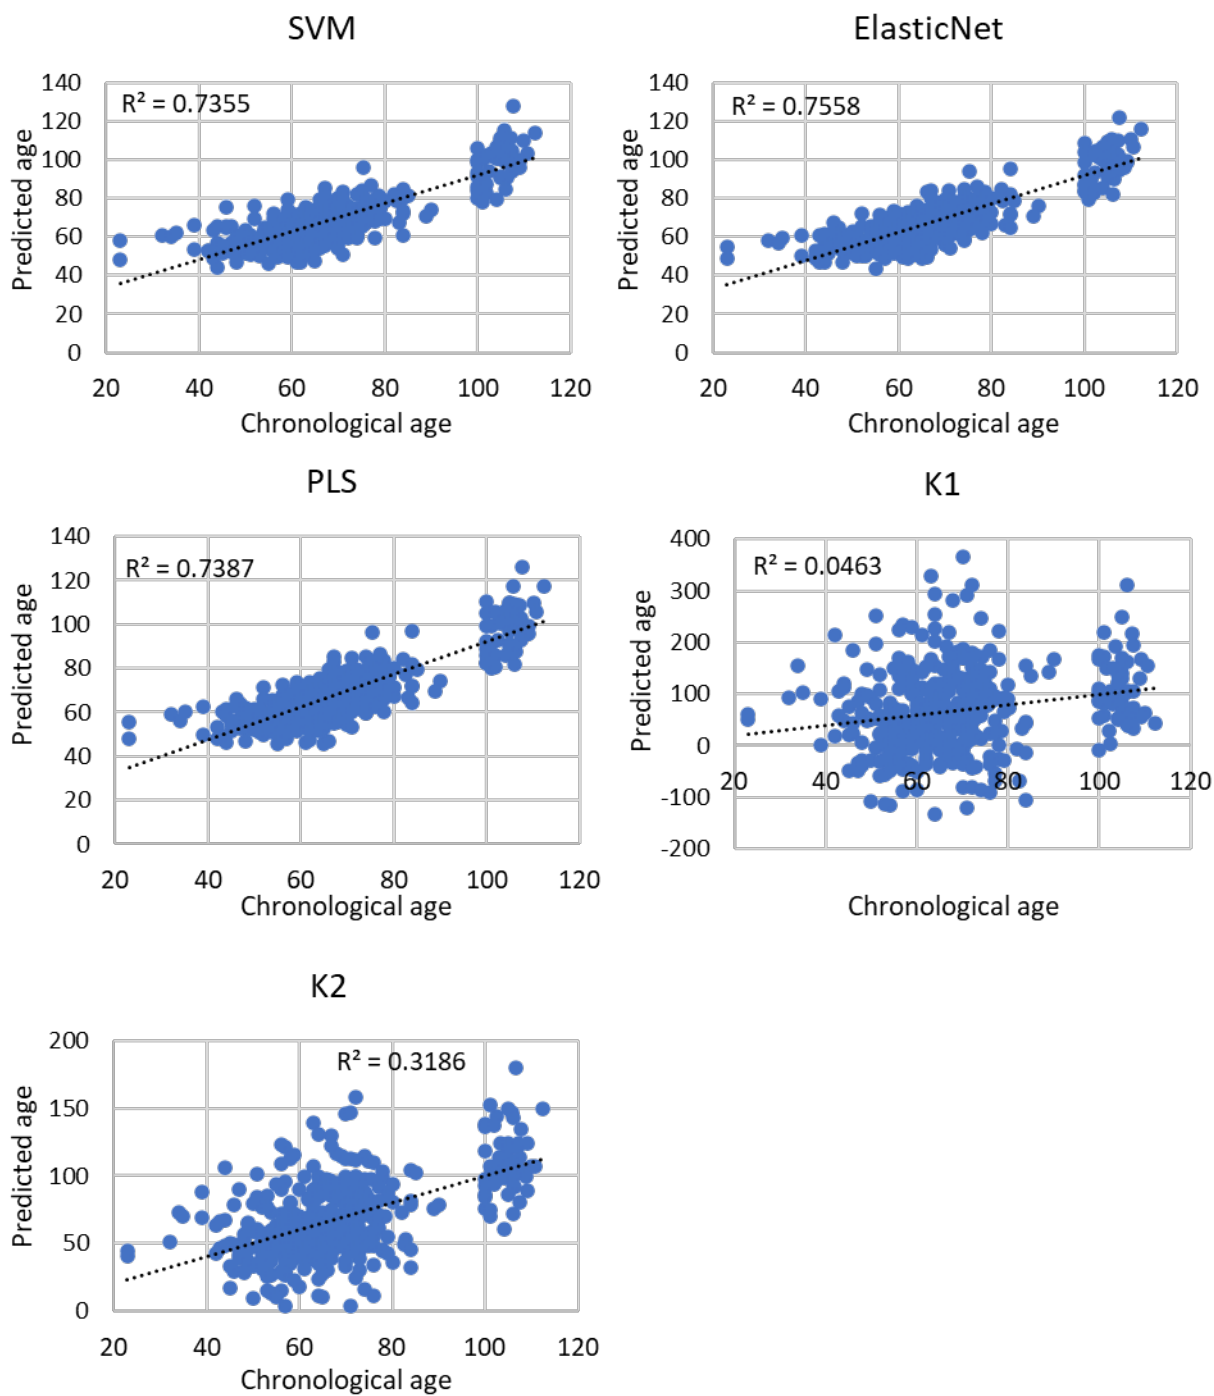

**Supplementary Figure S2.** Chronological age versus predicted age for the SVM, PLS, ElasticNet and the the Klemmeera-Doubal (K1 and K2) models built on quantified metabolites and lipoproteins matrix of CTR subjects.

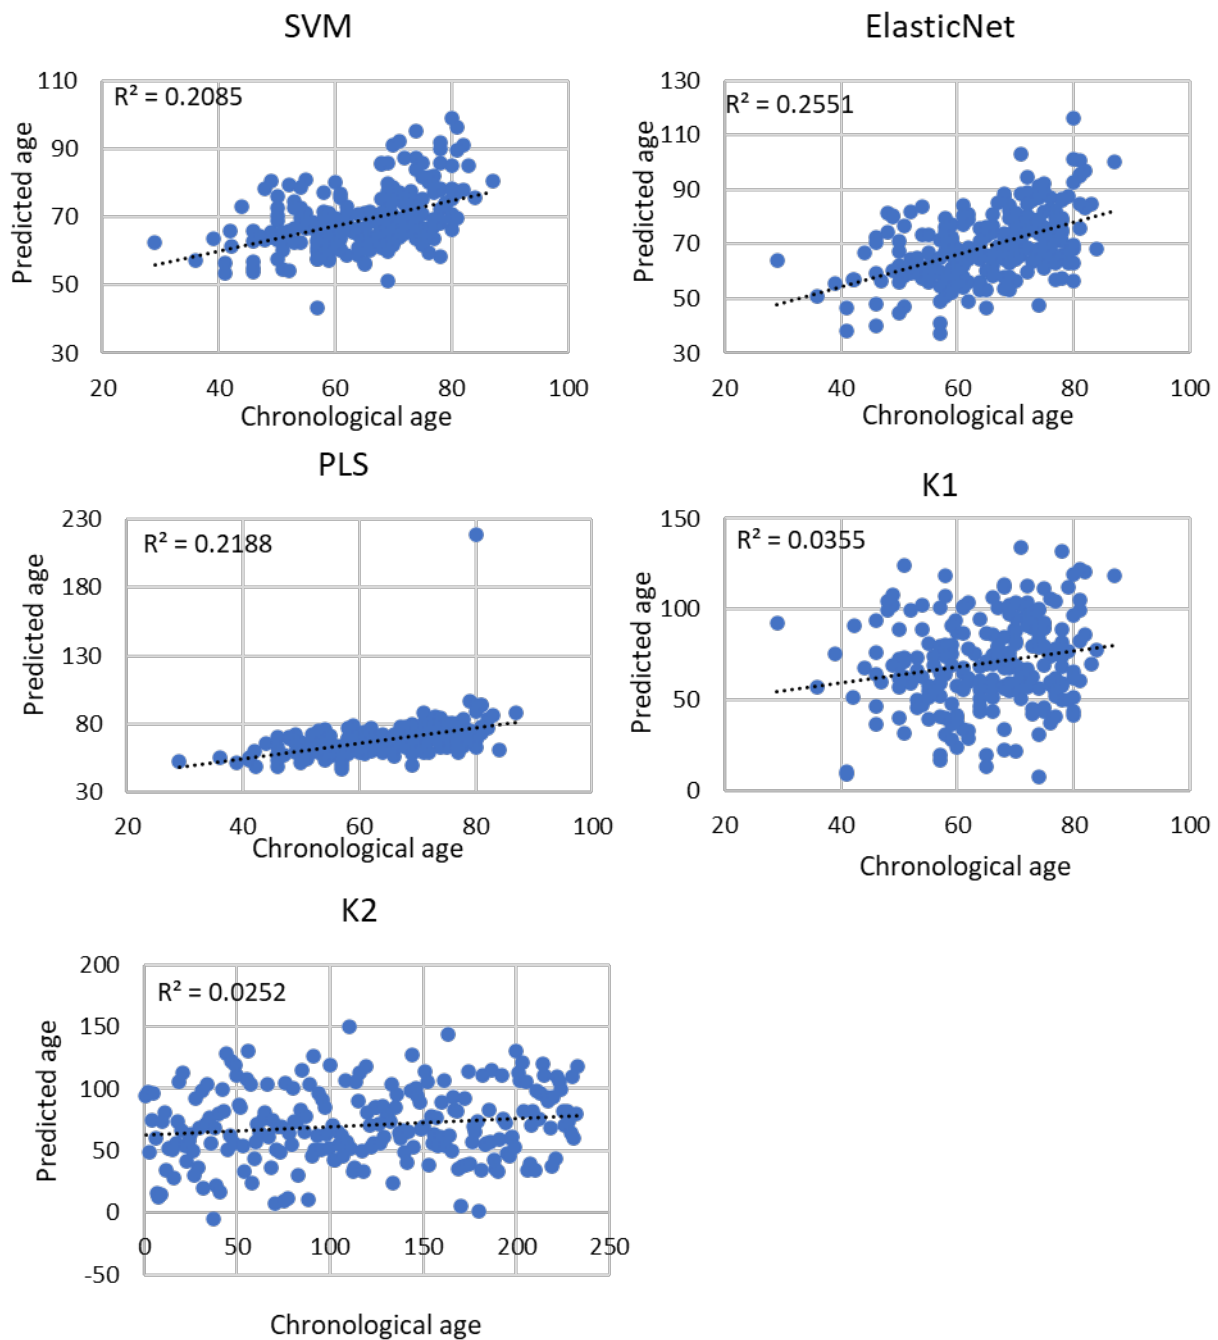

**Supplementary Figure S3.** Chronological age versus predicted age for the SVM, PLS, ElasticNet and the the Klemeera-Doubal (K1 and K2) models built on binned spectra of  $dn^2PD$  patients.

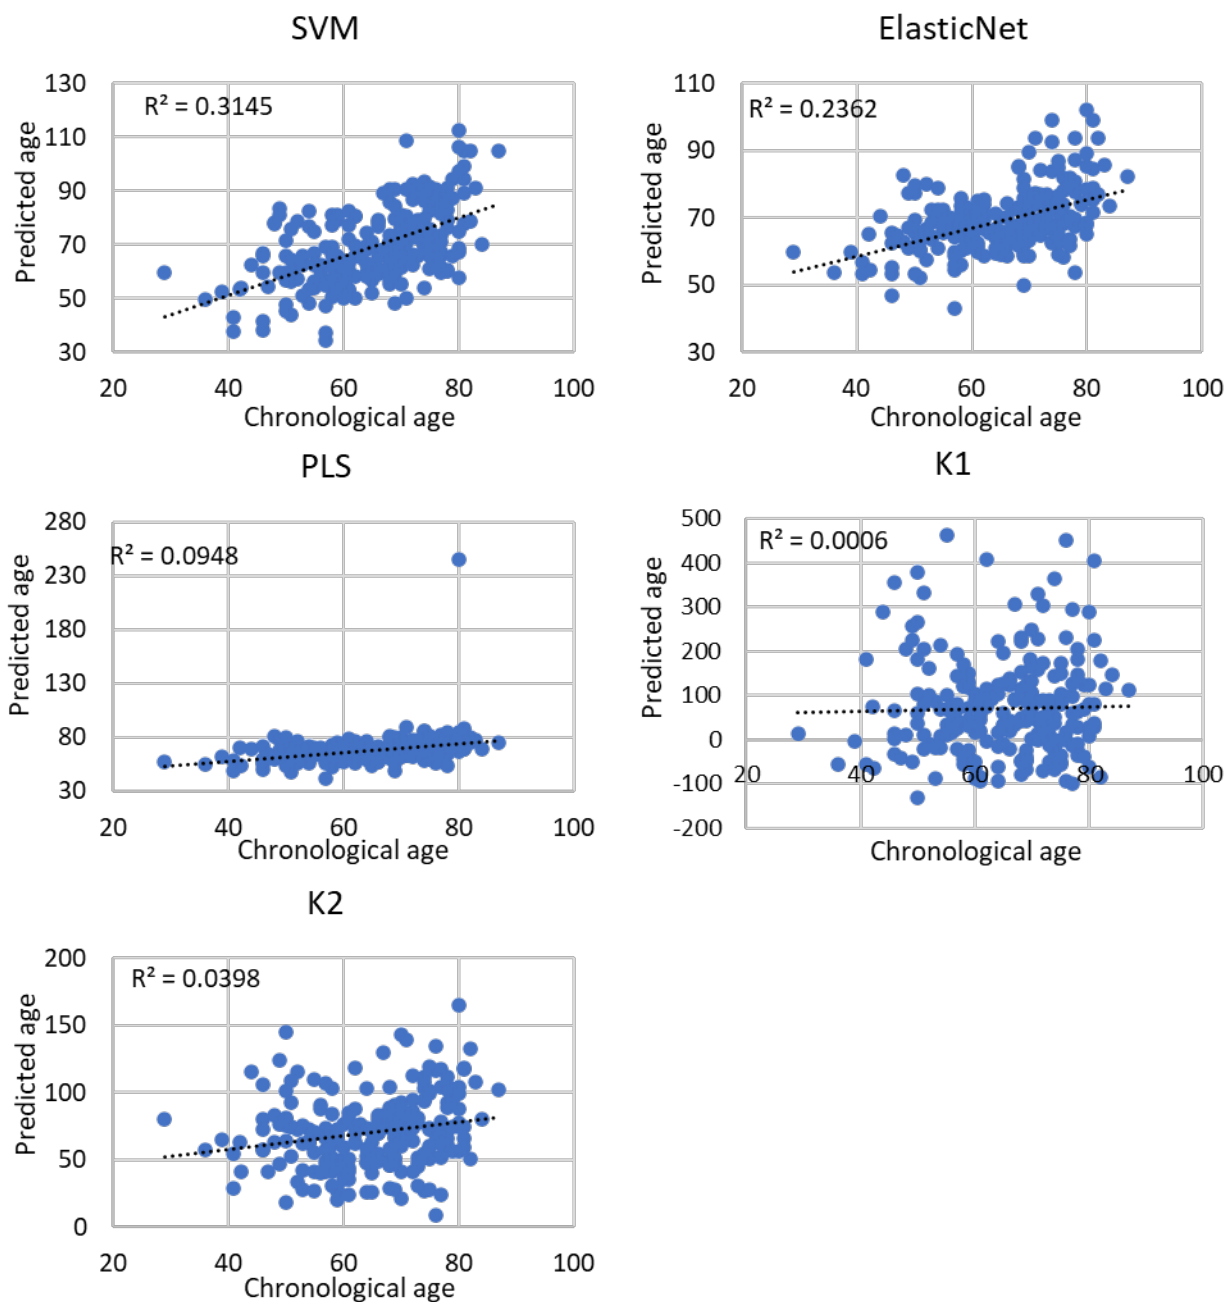

**Supplementary Figure S4.** Chronological age versus predicted age for the SVM, PLS, ElasticNet and the the Klemeera-Doubal (K1 and K2) models built on quantified metabolites and lipoproteins matrix of dn<sup>2</sup>PD patients.

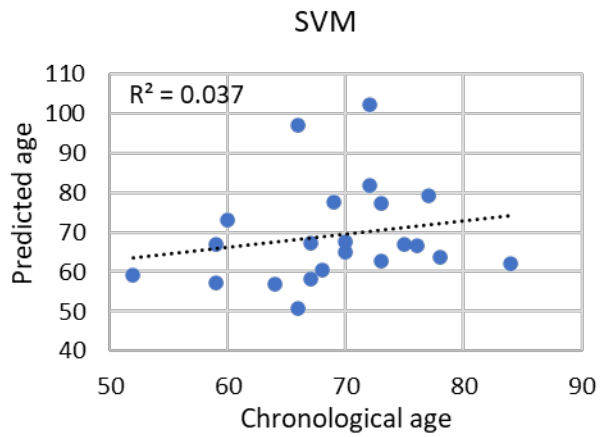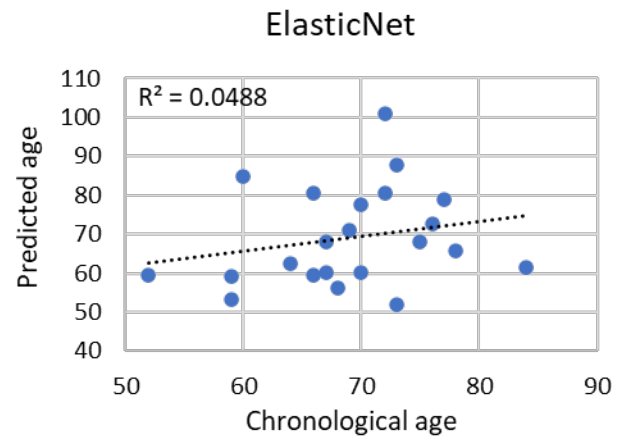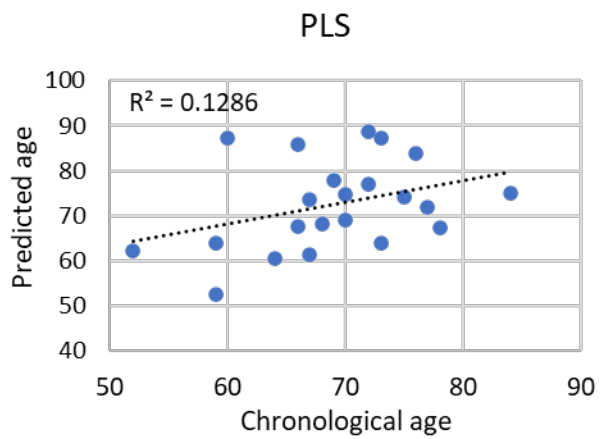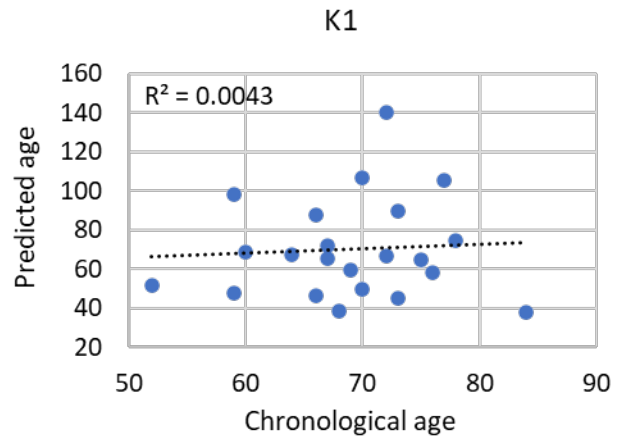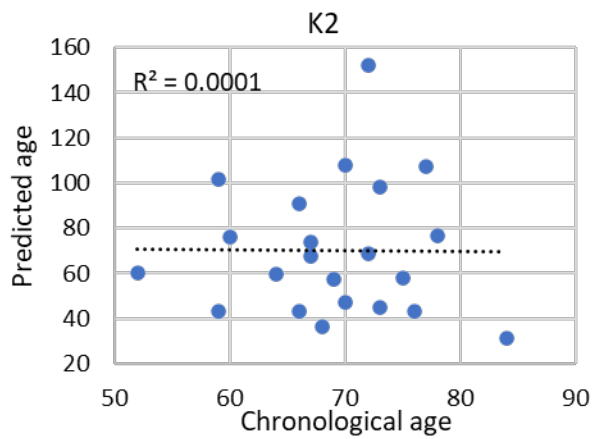

**Supplementary Figure S5.** Chronological age versus predicted age for the SVM, PLS, ElasticNet and the the Klemeera-Doubal (K1 and K2) models built on metabolites and lipoproteins of advPD patients.

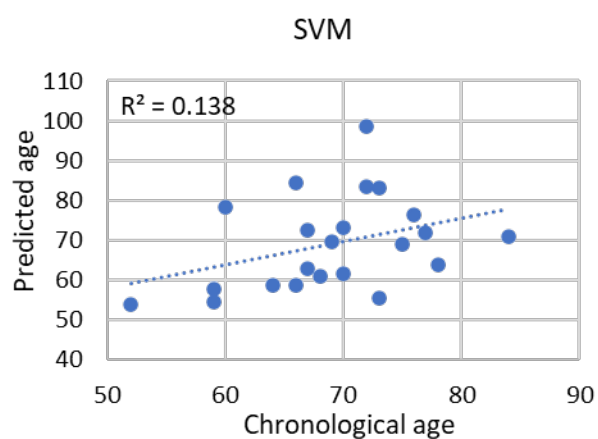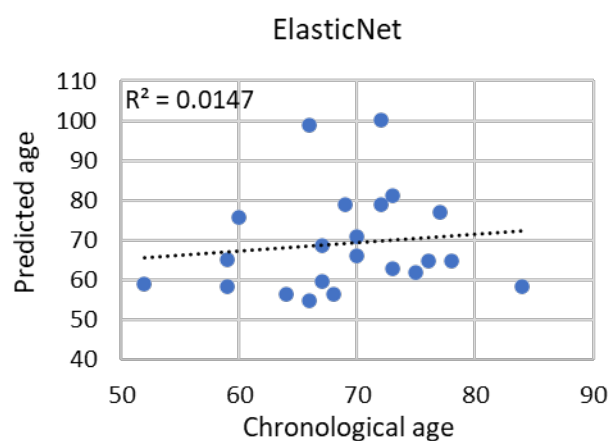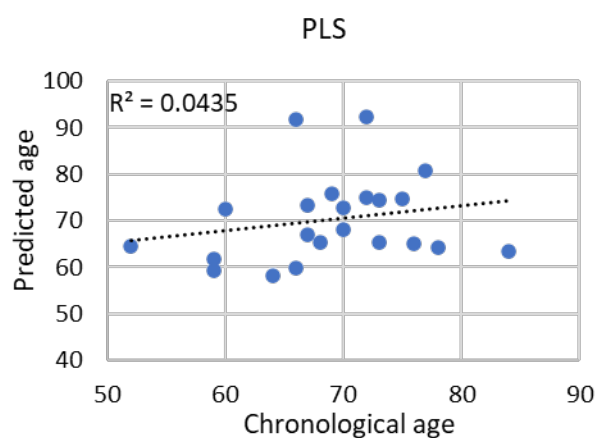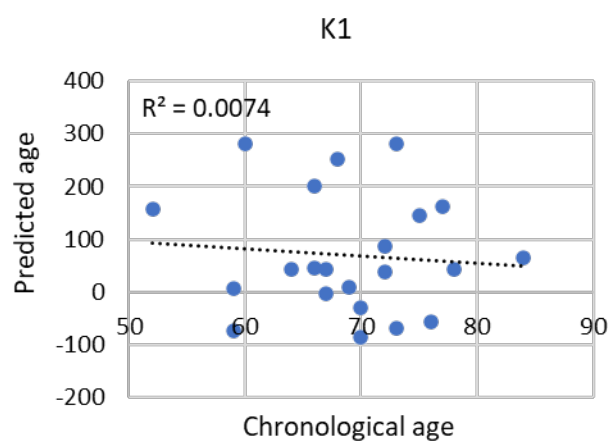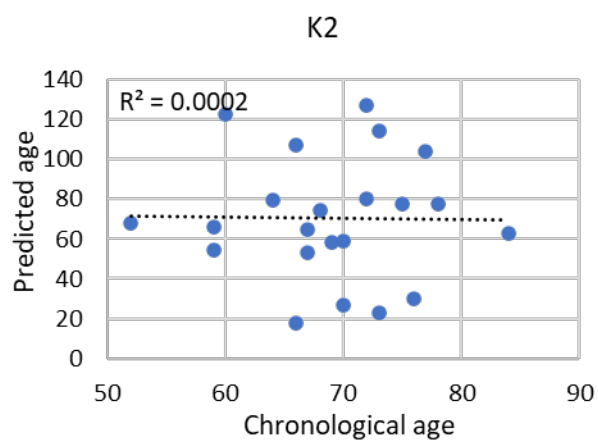

**Supplementary Figure S6.** Chronological age versus predicted age for the SVM, PLS, ElasticNet and the the Klemeera-Doubal (K1 and K2) models built on binned spectra of advPD patients.
