# Supplementary material
Source: MDPI journal article supplement (https://www.mdpi.com/2076-3417/12/18/8954)
Supplement: s1 [file s1]

Archive with 2 entries (2 files):
- Supplementary Excel table.xlsx
- Supplementary Materials.pdf
