# Supplementary material
Source: MDPI journal article supplement (https://www.mdpi.com/2076-3417/12/18/8954)
Supplement: s1 [file s1 › Supplementary Excel table.xlsx]

## Sheet: metabolites and lipoproteins
ID	diagnosis	sex	age	PROBABILITY	Trimethylamine.N.oxide	Alanine	Creatine	Creatinine	Glutamine	Glycine	Histidine	Isoleucine	Leucine	N.N.Dimethylglycine	Phenylalanine	Proline	Sarcosine	Threonine	Tyrosine	Valine	Acetic.acid	Citric.acid	Formic.acid	Lactic.acid	Succinic.acid	Choline	X3.Hydroxybutyric.acid	Acetoacetic.acid	Acetone	Pyruvic.acid	Glucose	Dimethylsulfone	TG	Chol	LDL-Chol	HDL-Chol	ApoA1	ApoA2	ApoB100	LDL-Chol/HDL-Chol	ApoB100/ApoA1	TotalParticleNumber	VLDL(Particle Number)	IDL (Particle Number)	LDL (Particle Number)	LDL1	LDL2	LDL3	LDL4
1	SIB	2	23	0.0355641	0.029	0.359	0.013	0.078	0.915	0.262	0.076	0.036	0.116	0.008	0.041	0.624	0.01	0.175277	0.054	0.219	0.026	0.2	0.026	1.268	0.001	0.111	0.033	0.017	0.015	0.042	5.794	0.004	63.67	184.07	104.83	62.35	155.07	35.66	68.03	1.68	0.44	1237.02	81.33	39.94	1113.2	149.62	156.43	178.19	197.6
2	SIB	2	53	0.0411314	0.024	0.537	0.031	0.072	0.879	0.267	0.085	0.032	0.111	0.007	0.041	0.61	0.00642394	0.175277	0.087	0.249	0.015	0.158	0.03	2.387	0.002	0.113	0.106506	0.01	0.006	0.125	5.534	0.008	139.89	252.33	140.1	84.79	195.37	47.93	98.65	1.65	0.5	1793.69	116.61	92.98	1623.53	259.17	200.03	223.31	221.62
3	SIB	2	54	0.0730992	0.011	0.336	0.055	0.101	0.784	0.437	0.11	0.04	0.088	0.006	0.056	0.662155	0.003	0.175277	0.059	0.196	0.034	0.182	0.031	1.787	0.009	0.114	0.222	0.074	0.068	0.078	5.278	0.008	80.94	313.73	211.79	86.27	197.58	41.57	135	2.45	0.68	2454.58	65.27	94.23	2307.02	374.72	387.45	421.16	406.72
4	SIB	1	52	0.0742291	0.069	0.439	0.002	0.09	0.899	0.29	0.078	0.079	0.095	0.008	0.034	0.517	0.005	0.149	0.042	0.257	0.06	0.176	0.035	1.496	0.001	0.182	0.12	0.014	0.018	0.064	5.331	0.007	55.34	151.72	76.06	63.51	148.07	34.52	55.26	1.2	0.37	1004.78	72.75	41.8	844.63	126.27	116.78	91.72	67.61
5	SIB	2	59	0.0770937	0.025	0.556	0.02	0.078	0.897	0.242	0.089	0.06	0.136	0.007	0.063	0.662155	0.004	0.175277	0.067	0.287	0.023	0.119	0.031	2.345	0.002	0.102	0.048	0.011	0.011	0.146	6.193	0.017	130.23	301.5	181.25	66.88	175.41	37.48	140.62	2.71	0.8	2556.83	169.41	154.8	2159.95	326.06	171.65	198.38	327.04
6	SIB	2	59	0.0770937	0.04	0.478	0.043	0.091	0.887	0.301	0.093	0.051	0.122	0.005	0.048	0.662155	0.004	0.211	0.056	0.205	0.031	0.143	0.025	1.943	0.002	0.064	0.037	0.008	0.009	0.1	5.007	0.014	53.65	191.32	92.53	83.57	186.63	40.33	62.03	1.11	0.33	1127.83	44.76	26.3	1051.8	185.22	147.13	134.15	90.6
7	SIB	2	59	0.0770937	0.082	0.415	0.024	0.084	0.938	0.292	0.085	0.042	0.061	0.01	0.051	0.662155	0.028	0.175277	0.085	0.241	0.025	0.251	0.034	1.463	0.001	0.072	0.058	0.01	0.015	0.043	5.814	0.008	180.52	226.92	108.92	66.17	178.37	39.76	92.62	1.65	0.52	1684.03	226.69	94.89	1327.24	205.11	62.64	127.25	251.34
8	SIB	2	47	0.0773196	0.019	0.619	0.026	0.08	0.623	0.201	0.055	0.1	0.158	0.006	0.057	0.662155	0.006	0.175277	0.081	0.296	0.017	0.272	0.042	3.512	0.001	0.078	0.106506	0.0235242	0.015	0.188	10.805	0.008	146.87	199.29	106.68	41.89	127.89	27.05	94.77	2.55	0.74	1723.19	191.84	106.66	1370.53	182.74	101.39	105.73	198.49
9	SIB	2	62	0.0913573	0.015	0.341	0.039	0.061	0.851	0.413	0.064	0.05	0.067	0.005	0.059	0.662155	0.004	0.115	0.06	0.217	0.043	0.233	0.026	2.238	0.00471947	0.119	0.055	0.016	0.025	0.077	5.838	0.012	68.71	241.17	135.92	87.18	186.02	29.32	87.54	1.56	0.47	1591.72	61.18	64.52	1492.74	338.01	290.26	273.68	191.7
10	SIB	2	57	0.0944855	0.024	0.439	0.053	0.075	0.794	0.194	0.087	0.036	0.114	0.006	0.04	0.584	0.00642394	0.175277	0.051	0.249	0.043	0.187	0.036	1.879	0.002	0.104	0.106506	0.007	0.008	0.133	6.779	0.006	85.58	208.69	110.67	76.23	191.1	41.19	81.77	1.45	0.43	1486.81	89.87	74.63	1328.96	225.2	136.2	173.01	247.56
11	SIB	1	58	0.104048	0.01	0.496	0.022	0.087	0.922	0.211	0.075	0.092	0.15	0.007	0.051	0.77	0.00642394	0.175277	0.052	0.263	0.061	0.147	0.038	2.081	0.002	0.162	0.037	0.022	0.009	0.105	4.953	0.01	248.51	241.99	134.61	58.54	156.75	39.29	110.63	2.3	0.71	2011.52	221.11	115.42	1689.03	141.65	87.03	136.65	247.36
12	SIB	1	58	0.104048	0.01	0.377	0.007	0.069	1.001	0.23	0.082	0.151	0.234	0.007	0.08	0.662155	0.00642394	0.175277	0.127	0.471	0.022	0.173	0.026	1.16	0.00471947	0.112	0.049	0.013	0.055	0.077	5.8	0.025	277.41	163.32	63.74	39.84	120.3	27.71	70.42	1.6	0.59	1280.39	217	98	896.6	146.05	60.96	31	68.2
13	SIB	1	46	0.109609	0.019	0.492	0.014	0.08	0.899	0.221	0.075	0.044	0.076	0.007	0.051	0.662155	0.003	0.175277	0.078	0.215	0.014	0.201	0.033	1.658	0.002	0.115	0.106506	0.012	0.009	0.098	5.491	0.006	113.76	232.86	144.17	59.53	157.89	37.83	107.94	2.42	0.68	1962.71	125.36	97.14	1754.35	184.78	116.02	173.02	283.24
14	SIB	1	53	0.120909	0.013	0.526	0.01	0.074	0.881	0.222	0.069	0.07	0.15	0.007	0.052	0.791	0.00642394	0.175277	0.088	0.244	0.058	0.219	0.042	2.138	0.002	0.076	0.036	0.009	0.005	0.139	8.09	0.01	145.25	255.47	169.13	56.96	162.98	43.96	120.11	2.97	0.74	2183.97	139.06	130.43	1969.19	212.37	246.18	278.99	397.21
15	SIB	2	64	0.128424	0.055	0.383	0.042	0.056	0.839	0.304	0.075	0.043	0.108	0.007	0.047	0.662155	0.004	0.175277	0.053	0.25	0.017	0.154	0.031	1.809	0.003	0.124	0.093	0.034	0.021	0.072	5.688	0.013	184.78	235.27	99.54	66.49	178.09	39.29	95	1.5	0.53	1727.4	268.69	154.59	1245.89	288.77	72.62	88.99	197.89
16	SIB	2	64	0.128424	0.026	0.562	0.01	0.072	0.882	0.255	0.09	0.064	0.103	0.005	0.042	0.662155	0.00642394	0.163	0.058	0.25	0.018	0.15	0.039	2.348	0.001	0.146	0.106506	0.008	0.009	0.1	4.711	0.011	100.12	191.86	94.49	67.18	185.58	49.57	81.81	1.41	0.44	1487.61	110.13	109.24	1194.84	245	177.94	153.81	208.09
17	SIB	2	58	0.136973	0.019	0.432	0.013	0.066	0.862	0.28	0.073	0.044	0.078	0.005	0.054	0.662155	0.00642394	0.113	0.074	0.244	0.015	0.216	0.035	1.92	0.002	0.067	0.106506	0.009	0.008	0.11	5.199	0.01	79.41	232.32	135.93	68.51	171.16	38.03	93.88	1.98	0.55	1706.95	88.15	92.28	1514.28	297.57	241.78	268.79	261.52
18	SIB	2	58	0.136973	0.023	0.613	0.016	0.067	0.889	0.259	0.085	0.072	0.099	0.006	0.071	0.767	0.00642394	0.175277	0.073	0.333	0.014	0.16	0.035	2.285	0.002	0.115	0.106506	0.005	0.008	0.13	5.186	0.01	137	296.96	178.14	71.09	185.73	41.75	137.58	2.51	0.74	2501.58	153.64	170.7	2160.42	375.97	176.59	262.45	409.4
19	SIB	2	48	0.139915	0.039	0.346	0.021	0.093	0.894	0.21	0.079	0.048	0.074	0.009	0.044	0.662155	0.00642394	0.123	0.045	0.236	0.031	0.225	0.028	0.916	0.001	0.069	0.128	0.009	0.02	0.047	4.657	0.014	62.7	240.51	145.34	75.86	171.2	33.29	94.28	1.92	0.55	1714.21	69.26	77.36	1598	305.94	285.06	265.75	212.87
20	SIB	2	45	0.139915	0.02	0.466	0.046	0.053	0.724	0.205	0.08	0.036	0.106	0.005	0.052	0.515	0.00642394	0.175277	0.059	0.192	0.013	0.244	0.038	1.616	0.001	0.097	0.106506	0.005	0.01	0.073	4.945	0.01	87.2	189.61	105.17	64.42	162.39	39.41	77.54	1.63	0.48	1409.95	120.26	59.43	1224.86	144.06	129.59	151.38	209.47
21	SIB	2	52	0.151091	0.024	0.421	0.056	0.082	0.8	0.218	0.115	0.104	0.134	0.005	0.045	0.662155	0.00642394	0.175277	0.062	0.277	0.055	0.275	0.044	3.257	0.022	0.13	0.367	0.093	0.07	0.156	6.974	0.024	172.24	255.76	145	67.17	175.5	55.49	110.75	2.16	0.63	2013.64	183.89	150.62	1699.88	146.41	164.32	243.06	375.83
22	SIB	1	49	0.154069	0.04	0.478	0.011	0.076	0.813	0.223	0.08	0.05	0.113	0.006	0.052	0.648	0.00642394	0.088	0.053	0.247	0.026	0.195	0.031	3.243	0.003	0.063	0.106506	0.007	0.017	0.157	5.5	0.009	63.18	202.43	112.9	68.66	170.42	37.89	80.29	1.64	0.47	1459.85	75.41	70.72	1280.57	207.04	127.31	154.14	228.99
23	SIB	1	53	0.154069	0.038	0.426	0.007	0.112	0.922	0.307	0.096	0.055	0.127	0.005	0.063	0.662155	0.00642394	0.17	0.063	0.252	0.022	0.187	0.03	1.26	0.00471947	0.118	0.106506	0.013	0.009	0.086	6.736	0.009	63.01	238.31	143.88	76.34	177.15	42.41	94.4	1.88	0.53	1716.47	56.14	88.11	1611.14	253.9	233.52	255.25	252.95
24	SIB	2	47	0.157869	0.026	0.494	0.035	0.067	0.899	0.247	0.087	0.05	0.08	0.006	0.035	0.662155	0.00642394	0.129	0.053	0.203	0.05	0.207	0.031	1.703	0.002	0.116	0.044	0.016	0.018	0.13	6.411	0.007	85.92	274.87	180.38	68.05	164.68	34.86	124.42	2.65	0.76	2262.28	108.5	120.95	1973.95	340.93	294.56	314.19	322.75
25	SIB	2	53	0.157869	0.01	0.461	0.027	0.047	0.996	0.283	0.087	0.071	0.083	0.005	0.046	0.662155	0.00642394	0.235	0.059	0.191	0.023	0.173	0.038	1.175	0.004	0.11	0.02	0.008	0.016	0.065	5.603	0.007	69.88	249.73	154.94	75.53	169.42	38.04	101.74	2.05	0.6	1849.89	88.81	64.78	1675	248.38	262.82	256.26	215.58
26	SIB	1	57	0.162795	0.016	0.47	0.004	0.137	0.942	0.204	0.099	0.054	0.089	0.006	0.047	0.743	0.00642394	0.175277	0.042	0.289	0.047	0.209	0.036	1.443	0.005	0.143	0.134	0.066	0.014	0.136	6.56	0.008	379.12	237.2	123.27	46.35	140.9	36.16	112.41	2.66	0.8	2043.85	314.19	166.52	1584.2	92.37	80.63	182.83	270.47
27	SIB	1	62	0.173294	0.031	0.467	0.007	0.102	0.77	0.262	0.062	0.06	0.106	0.009	0.046	0.662155	0.002	0.148	0.061	0.244	0.029	0.227	0.028	2.751	0.00471947	0.122	0.078	0.029	0.04	0.149	6.217	0.016	71.87	205.6	113.37	62.91	168.15	35.7	82.56	1.8	0.49	1501.22	92.67	96.61	1236.04	273.03	191.96	189.99	208.04
28	SIB	2	50	0.173629	0.008	0.479	0.048	0.054	0.801	0.318	0.075	0.033	0.083	0.006	0.046	0.662155	0.00642394	0.124	0.063	0.185	0.021	0.16	0.034	2.908	0.001	0.084	0.106506	0.011	0.007	0.131	5.655	0.009	77.03	292.61	191.22	69.47	178.23	46.7	130.15	2.75	0.73	2366.46	78.84	134.26	2156.26	336.46	236.77	336.75	440.83
29	SIB	1	56	0.184825	0.045	0.472	0.005	0.098	1.095	0.275	0.078	0.081	0.122	0.008	0.054	0.662155	0.011	0.175277	0.055	0.296	0.031	0.266	0.038	1.513	0.00471947	0.162	0.039	0.005	0.02	0.052	5.583	0.01	134.86	191.23	101.51	56.06	151.33	34.12	80.39	1.81	0.53	1461.62	161.76	71.86	1239.35	163.95	103.19	142.83	197.02
30	SIB	1	56	0.195484	0.01	0.33	0.045	0.084	0.81	0.376	0.093	0.036	0.079	0.005	0.036	0.662155	0.014	0.175277	0.091	0.213	0.028	0.148	0.028	1.276	0.001	0.112	0.106506	0.014	0.012	0.098	6.094	0.012	167.71	233.75	116.07	50.32	145.41	34.27	107.58	2.31	0.74	1956.01	218.6	104.7	1539.45	262.67	65.72	107.6	205.76
31	SIB	1	75	0.201837	0.006	0.447	0.009	0.096	0.991	0.266	0.088	0.065	0.142	0.018	0.047	0.662155	0.002	0.194	0.06	0.26	0.025	0.212	0.03	2.316	0.001	0.086	0.027	0.011	0.018	0.076	5.691	0.016	79.5	137.76	69.67	45.74	125.66	29.01	60.78	1.52	0.48	1105.07	128.45	76.83	855.6	140.61	90.77	58.87	115.78
32	SIB	1	45	0.203865	0.022	0.233	0.008	0.095	0.979	0.257	0.072	0.07	0.126	0.007	0.038	0.662155	0.00642394	0.103	0.051	0.223	0.051	0.213	0.025	1.267	0.006	0.144	0.104	0.062	0.031	0.059	6.253	0.008	57.15	242.94	157.51	70.05	172.63	41.93	106.96	2.25	0.62	1944.75	56.8	95.11	1760.69	268.58	207.81	263.57	336.86
33	SIB	1	51	0.203865	0.095	0.315	0.025	0.075	0.868	0.214	0.08	0.048	0.105	0.031	0.049	0.662155	0.006	0.175277	0.065	0.206	0.021	0.216	0.021	1.437	0.001	0.142	0.069	0.027	0.015	0.105	5.893	0.007	122.35	210	131.98	42.23	136.33	32.13	99.75	3.13	0.73	1813.8	150.36	92.04	1540.43	172.95	138.97	222.66	366.15
34	SIB	2	59	0.209976	0.066	0.391	0.057	0.058	0.803	0.285	0.081	0.047	0.079	0.008	0.059	0.662155	0.00642394	0.175277	0.068	0.244	0.017	0.248	0.038	2.027	0.008	0.078	0.117	0.043	0.026	0.106	6.55	0.012	89.06	195.97	71.12	98.49	214.62	42.93	55.28	0.72	0.26	1005.18	92.04	57.97	790.02	228.68	104.04	72.4	35.84
35	SIB	2	59	0.213856	0.031	0.404	0.015	0.065	0.752	0.232	0.069	0.04	0.087	0.005	0.053	0.662155	0.00642394	0.156	0.06	0.253	0.021	0.23	0.029	2.053	0.003	0.105	0.109	0.037	0.012	0.112	7.192	0.013	81.13	207.58	124.08	55.86	148.06	34.01	91.38	2.22	0.62	1661.51	107.86	97.52	1418.55	234.02	167.07	204.57	263.37
36	SIB	2	64	0.228081	0.013	0.458	0.035	0.075	0.985	0.272	0.105	0.052	0.104	0.008	0.046	0.741	0.00642394	0.175277	0.08	0.346	0.016	0.183	0.027	1.902	0.002	0.095	0.043	0.006	0.033	0.116	6.006	0.008	92.48	277	182.08	66.52	161.55	37.61	119.23	2.74	0.74	2167.9	96.74	129.11	1945.86	406.57	351.71	377.25	355.46
37	SIB	2	56	0.230925	0.018	0.496	0.091	0.079	0.901	0.304	0.079	0.055	0.129	0.008	0.075	0.662155	0.001	0.254	0.062	0.31	0.014	0.164	0.028	2.85	0.001	0.097	0.106506	0.017	0.018	0.137	6.245	0.008	102.43	250.38	139.03	62.69	162.83	38.44	106.14	2.22	0.65	1929.89	147.06	135.5	1608.71	339.07	150.98	197.85	289.9
38	SIB	1	54	0.240988	0.035	0.353	0.008	0.09	0.967	0.341	0.091	0.057	0.129	0.007	0.038	0.662155	0.006	0.186	0.053	0.281	0.032	0.22	0.032	1.146	0.002	0.16	0.08	0.029	0.036	0.052	5.675	0.014	78.16	257.24	143.46	88.25	195.4	37.98	91.38	1.63	0.47	1661.6	91.61	67.18	1480.13	255.62	260.95	218.02	156.03
39	SIB	2	55	0.246452	0.029	0.415	0.017	0.057	1.038	0.395	0.085	0.032	0.082	0.006	0.028	0.662155	0.004	0.193	0.039	0.211	0.017	0.251	0.027	1.579	0.002	0.129	0.059	0.006	0.027	0.083	6.512	0.032	76.93	190.32	84.79	79.04	183.05	36.84	61.07	1.07	0.33	1110.46	102.82	62.96	909.49	244.25	171.75	118.39	54.95
40	SIB	2	53	0.246452	0.023	0.547	0.067	0.1	0.802	0.379	0.12	0.056	0.126	0.006	0.037	0.662155	0.00642394	0.175277	0.067	0.281	0.014	0.176	0.034	2.145	0.002	0.09	0.106506	0.009	0.007	0.135	6.165	0.009	107.72	244.36	135.02	81.08	203.49	46.61	97.52	1.67	0.48	1773.23	104.25	114.46	1569.69	266.9	188.93	217.18	296.95
41	SIB	2	65	0.251565	0.011	0.435	0.036	0.065	0.843	0.244	0.095	0.042	0.102	0.015	0.052	0.662155	0.002	0.175277	0.066	0.271	0.018	0.21	0.027	1.718	0.002	0.16	0.047	0.013	0.01	0.089	5.908	0.005	89.7	269.22	163.11	79.8	189.94	44.64	108.58	2.04	0.57	1974.31	93.79	103.18	1772.59	313.08	264.38	283.6	292.79
42	SIB	2	58	0.259406	0.042	0.301	0.022	0.055	0.871	0.274	0.069	0.039	0.049	0.006	0.024	0.662155	0.00642394	0.166	0.033	0.144	0.068	0.253	0.046	1.962	0.006	0.123	0.189	0.069	0.056	0.137	5.278	0.013	52.78	260.05	157.14	91.99	190.17	37.22	98.02	1.71	0.52	1782.34	31.11	49.46	1781.64	270.57	309.14	281.68	158.96
43	SIB	2	54	0.266116	0.024	0.326	0.026	0.059	0.82	0.308	0.082	0.037	0.117	0.009	0.046	0.567	0.006	0.236	0.056	0.235	0.027	0.18	0.03	1.872	0.001	0.131	0.128	0.027	0.021	0.099	5.762	0.016	65.67	162.9	87.74	55.49	142.7	32.26	60.13	1.58	0.42	1093.36	93.99	35.1	928.23	175.31	154.09	166.63	149.22
44	SIB	1	66	0.276982	0.002	0.295	0.045	0.073	0.635	0.181	0.059	0.039	0.145	0.006	0.044	0.662155	0.00642394	0.175277	0.051	0.224	0.027	0.153	0.03	1.073	0.003	0.108	0.123	0.055	0.022	0.078	5.596	0.005	182.53	286.56	152.89	70.83	198.94	55.63	127.29	2.16	0.64	2314.55	242.73	189.82	1896.78	212.64	87.66	167.1	395.79
45	SIB	1	66	0.276982	0.028	0.328	0.057	0.069	0.969	0.279	0.07	0.052	0.098	0.007	0.047	0.662155	0.00642394	0.209	0.069	0.271	0.021	0.164	0.028	1.427	0.001	0.091	0.106506	0.009	0.024	0.059	6.672	0.012	84.46	185.33	98.97	61.13	158.79	36.94	82.24	1.62	0.52	1495.33	117.98	109.99	1271.18	241.26	136.03	128	166.94
46	SIB	2	61	0.277173	0.049	0.36	0.052	0.06	1.003	0.311	0.079	0.069	0.082	0.007	0.054	0.513	0.005	0.25	0.06	0.226	0.026	0.251	0.029	1.513	0.003	0.129	0.156	0.044	0.037	0.044	6.764	0.008	67.5	223.17	117.39	91.61	208.24	40.74	78.12	1.28	0.38	1420.37	42.4	59	1372.42	234.49	205.01	198.87	174.59
47	SIB	2	63	0.279439	0.011	0.391	0.008	0.081	0.844	0.223	0.065	0.062	0.074	0.007	0.047	0.662155	0.004	0.175277	0.057	0.269	0.029	0.226	0.027	2.206	0.002	0.088	0.095	0.022	0.014	0.101	5.059	0.019	100.93	243.18	144.46	59.37	146.17	33.16	114.45	2.43	0.78	2081.09	162.78	140.73	1742.94	348.94	219.63	217.39	240.5
48	SIB	1	44	0.295393	0.086	0.309	0.022	0.096	0.863	0.252	0.069	0.091	0.149	0.008	0.046	0.662155	0.001	0.183	0.035	0.399	0.039	0.18	0.035	2.022	0.01	0.143	0.201	0.062	0.076	0.08	5.134	0.009	68.62	202.49	103.74	60.25	147.77	36.76	81.43	1.72	0.55	1480.64	103.34	138.98	1231.28	241.3	103.02	96	185.25
49	SIB	1	39	0.295393	0.003	0.374	0.009	0.088	1.042	0.362	0.081	0.053	0.095	0.008	0.062	0.662155	0.004	0.175277	0.05	0.22	0.025	0.235	0.023	2.306	0.003	0.104	0.071	0.02	0.033	0.086	5.244	0.009	136.14	213.33	124.54	41.28	122.95	34.09	97.85	3.02	0.8	1779.15	177.89	109.67	1455.52	196.76	98	151.03	254.43
50	SIB	2	57	0.301054	0.035	0.293	0.06	0.048	0.766	0.425	0.068	0.041	0.083	0.005	0.043	0.662155	0.005	0.175277	0.04	0.198	0.055	0.182	0.035	1.131	0.001	0.065	0.106506	0.02	0.01	0.068	6.105	0.01	92.28	238.2	120.64	82.09	190.85	42.63	88.29	1.47	0.46	1605.43	106.59	77.96	1364.3	294.45	183.95	182.09	142.83
51	SIB	2	64	0.307875	0.029	0.525	0.041	0.129	0.695	0.223	0.117	0.067	0.139	0.006	0.057	0.612	0.00642394	0.175277	0.061	0.328	0.045	0.221	0.043	2.217	0.009	0.158	0.164	0.031	0.036	0.157	19.624	0.013	234.57	236.14	100.34	59.43	157.51	35.04	102.32	1.69	0.65	1860.51	263.22	136.76	1369.15	187.93	41.11	39.53	104.24
52	SIB	1	69	0.308257	0.018	0.33	0.002	0.108	0.845	0.208	0.072	0.04	0.12	0.01	0.049	0.662155	0.011	0.175277	0.068	0.276	0.035	0.208	0.023	1.259	0.004	0.129	0.131	0.034	0.015	0.068	9.109	0.011	202.29	200.01	96.06	47.12	142.14	34.6	91.69	2.04	0.65	1667.16	251.07	95.71	1249.17	142.59	39.12	77.35	193.61
53	SIB	2	50	0.308257	0.043	0.335	0.039	0.078	0.949	0.356	0.075	0.04	0.068	0.009	0.034	0.662155	0.00642394	0.163	0.053	0.247	0.056	0.197	0.031	0.914	0.006	0.116	0.06	0.031	0.026	0.044	5.016	0.006	51.65	216.54	123.43	81.76	170.47	32.98	81.77	1.51	0.48	1486.74	45.11	68.68	1392.09	254.6	244.65	194.29	112.28
54	SIB	2	52	0.313343	0.028	0.32	0.013	0.069	0.84	0.412	0.068	0.058	0.066	0.004	0.047	0.662155	0.003	0.175277	0.051	0.192	0.037	0.196	0.033	2.184	0.002	0.121	0.106506	0.005	0.018	0.058	4.945	0.011	99.31	207.33	94.44	82.81	193.2	31.73	71.33	1.14	0.37	1297.03	108.5	84.73	1114.1	319.55	227.74	188.32	79.91
55	SIB	2	50	0.313343	0.04	0.468	0.043	0.067	0.971	0.258	0.078	0.07	0.113	0.005	0.064	0.662155	0.001	0.109	0.058	0.308	0.019	0.2	0.032	2.191	0.002	0.138	0.108	0.02	0.024	0.042	5.182	0.016	87.28	291.4	174.4	72.19	182.39	41.66	119.06	2.42	0.65	2164.91	108.06	128.62	1876.04	398.47	289.16	277.7	288.24
56	SIB	1	57	0.317247	0.019	0.406	0.009	0.085	0.91	0.28	0.077	0.065	0.096	0.006	0.049	0.662155	0.002	0.175277	0.066	0.236	0.016	0.14	0.034	1.991	0.002	0.118	0.106506	0.01	0.008	0.109	5.966	0.012	118.34	259.86	138.04	83.39	203.38	39.72	104.71	1.66	0.51	1903.98	154.27	145.59	1595.21	390.89	253.51	256.94	234.34
57	SIB	2	57	0.3277	0.075	0.343	0.016	0.064	0.94	0.24	0.081	0.048	0.089	0.01	0.049	0.662155	0.01	0.111	0.056	0.255	0.027	0.238	0.023	1.68	0.003	0.115	0.037	0.012	0.015	0.068	5.43	0.007	59.04	278.76	159.96	104.23	211.87	38.85	96.6	1.53	0.46	1756.42	30.73	46.73	1718.06	329.07	319.08	294.72	183.35
58	SIB	2	32	0.329855	0.008	0.46	0.03	0.073	0.672	0.186	0.091	0.038	0.084	0.005	0.041	0.439	0.00642394	0.116	0.046	0.216	0.015	0.172	0.04	2.256	0.00471947	0.082	0.106506	0.007	0.009	0.102	4.473	0.006	94.27	188.89	94.29	78.22	196.39	41.29	76.23	1.21	0.39	1386.14	96.01	75.09	1196.09	183.12	142.99	128.23	148.07
59	SIB	2	50	0.335539	0.007	0.597	0.026	0.069	0.8	0.29	0.077	0.058	0.115	0.005	0.065	0.662155	0.00642394	0.175277	0.066	0.3	0.015	0.243	0.027	3.135	0.004	0.091	0.106506	0.007	0.012	0.136	5.914	0.008	159.81	217.41	116.48	52.81	141.86	33.27	91.64	2.21	0.65	1666.31	186.55	95.92	1327.3	212.18	130.74	159.73	211.01
60	SIB	2	54	0.341731	0.008	0.379	0.05	0.089	0.747	0.418	0.091	0.049	0.102	0.006	0.043	0.662155	0.004	0.175277	0.059	0.239	0.027	0.24	0.033	1.874	0.007	0.116	0.12	0.076	0.078	0.076	5.435	0.003	84.51	269.63	167.54	78.15	176.27	36.26	110.37	2.14	0.63	2006.81	93.08	92.38	1808.87	333.64	304.7	313.43	295.44
61	SIB	2	52	0.341731	0.003	0.555	0.051	0.076	0.841	0.273	0.085	0.053	0.098	0.005	0.052	0.662155	0.00642394	0.159	0.041	0.272	0.086	0.142	0.037	2.953	0.002	0.083	0.041	0.019	0.015	0.171	4.827	0.009	75.2	220.58	144.58	50.68	146.91	40.33	97.5	2.85	0.66	1772.73	68.34	96.04	1622.94	255.71	203.82	271.72	353.64
62	SIB	2	46	0.341731	0.002	0.376	0.049	0.105	0.686	0.191	0.081	0.053	0.126	0.005	0.051	0.662155	0.00642394	0.304	0.045	0.237	0.04	0.15	0.038	1.91	0.001	0.077	0.101	0.035	0.017	0.073	5.093	0.005	135.43	277.85	154.28	91.96	241.88	50.94	120.37	1.68	0.5	2188.68	143.62	139.42	1874.25	257.86	154.68	218.3	381.39
63	SIB	2	62	0.352373	0.032	0.394	0.005	0.081	0.832	0.507	0.065	0.06	0.099	0.006	0.051	0.662155	0.004	0.175277	0.057	0.202	0.072	0.199	0.027	2.165	0.002	0.1	0.05	0.012	0.03	0.101	5.007	0.01	80.62	227.9	133.02	72.18	169.89	38.15	93.23	1.84	0.55	1695.23	96.08	72.38	1534.24	243.02	196.84	223.72	232.37
64	SIB	1	57	0.353402	0.026	0.359	0.013	0.094	0.789	0.208	0.069	0.066	0.119	0.006	0.031	0.662155	0.00642394	0.111	0.042	0.283	0.085	0.211	0.046	1.265	0.001	0.166	0.077	0.022	0.03	0.079	5.835	0.019	69.89	222.09	141.26	56.8	147.97	33.88	97.88	2.49	0.66	1779.68	84.77	75.46	1556.02	249.13	195.97	213.49	261.49
65	SIB	2	64	0.355919	0.015	0.473	0.013	0.061	1.042	0.36	0.095	0.056	0.091	0.011	0.044	0.662155	0.006	0.189	0.06	0.246	0.035	0.21	0.035	2.371	0.002	0.126	0.106506	0.009	0.02	0.096	5.163	0.008	68.74	231.75	119.14	94.53	202.84	39.12	77.47	1.26	0.38	1408.63	62.85	45.15	1308.8	242.2	206.45	190.44	136.18
66	SIB	2	76	0.358757	0.052	0.416	0.017	0.06	0.945	0.38	0.067	0.04	0.097	0.005	0.046	0.711	0.006	0.187	0.053	0.213	0.02	0.215	0.029	2.082	0.002	0.088	0.058	0.0235242	0.019	0.067	5.546	0.01	74.76	202.48	99.71	80	190.83	40.45	77.62	1.25	0.41	1411.28	75.92	76.23	1217.75	255.09	151.49	142.07	133.14
67	SIB	2	65	0.36443	0.02	0.546	0.007	0.07	0.98	0.39	0.082	0.051	0.112	0.005	0.057	0.662155	0.001	0.226	0.046	0.228	0.021	0.169	0.033	1.381	0.00471947	0.079	0.043	0.006	0.03	0.058	6.412	0.007	62.5	208.42	136.69	60.74	141.92	31.99	96.93	2.25	0.68	1762.46	71.22	85.7	1608.95	284.48	263.11	258.14	217.84
68	SIB	2	52	0.381316	0.02	0.469	0.021	0.077	0.881	0.291	0.104	0.052	0.083	0.004	0.047	0.662155	0.005	0.175277	0.051	0.237	0.078	0.18	0.023	2.999	0.004	0.068	0.017	0.005	0.042	0.156	4.786	0.008	118.49	301.75	161.7	94.12	222.99	43.44	118.88	1.72	0.53	2161.53	128.54	128.83	1933.88	360.83	276.03	271.48	242.03
69	SIB	2	80	0.409797	0.028	0.491	0.031	0.067	0.978	0.401	0.07	0.041	0.118	0.009	0.045	0.662155	0.004	0.175277	0.059	0.247	0.021	0.262	0.021	2.503	0.002	0.093	0.176	0.036	0.017	0.077	6.878	0.011	97.66	254.81	128.53	91.61	213.63	46.99	96.64	1.4	0.45	1757.23	113.54	99.44	1512.7	279.49	148.73	163.45	185.18
70	SIB	1	49	0.415699	0.018	0.432	0.029	0.101	0.933	0.206	0.069	0.054	0.127	0.009	0.042	0.662155	0.00642394	0.16	0.06	0.264	0.019	0.159	0.032	1.648	0.002	0.124	0.106506	0.009	0.014	0.093	5.331	0.004	58.85	187.98	105.22	64.43	155.27	36.92	71.47	1.63	0.46	1299.51	74.35	51.26	1142.25	191.02	159.34	152.6	156.09
71	SIB	2	48	0.418573	0.015	0.455	0.03	0.094	0.796	0.229	0.082	0.054	0.086	0.005	0.051	0.662155	0.004	0.175277	0.061	0.27	0.04	0.213	0.028	1.131	0.003	0.122	0.106506	0.006	0.008	0.071	5.568	0.016	82.8	207.19	105	79.83	171.64	37.97	75.5	1.32	0.44	1372.77	92.66	57.78	1242.86	240.89	176.05	150.75	117.45
72	SIB	1	70	0.426799	0.029	0.374	0.018	0.138	0.823	0.218	0.063	0.077	0.09	0.01	0.052	0.662155	0.019	0.175277	0.045	0.288	0.042	0.23	0.035	1.475	0.002	0.141	0.106506	0.013	0.014	0.095	5.518	0.013	260.17	207.92	57.75	48.25	161.79	33.76	93.52	1.2	0.58	1700.52	367.94	157.48	1082.95	266.65	39.08	0	6.47
73	SIB	2	65	0.442741	0.03	0.341	0.052	0.073	0.839	0.338	0.075	0.048	0.112	0.005	0.053	0.662155	0.00642394	0.175277	0.048	0.281	0.049	0.176	0.029	1.282	0.00471947	0.096	0.073	0.012	0.024	0.053	6.208	0.014	102.46	272.07	162.24	69.08	165.36	35.29	124.62	2.35	0.75	2265.96	144.4	140.46	1943.85	305.52	142.01	189.75	314.65
74	SIB	1	56	0.444968	0.023	0.56	0.006	0.093	1.018	0.242	0.093	0.077	0.191	0.009	0.075	0.662155	0.008	0.175277	0.079	0.338	0.02	0.193	0.033	3.046	0.004	0.119	0.106506	0.011	0.011	0.141	6.201	0.008	175.58	252.3	133.22	74.67	186.39	44.39	93.72	1.78	0.5	1704.12	158.25	79.02	1467.85	189.28	123.81	181.84	247.07
75	SIB	1	57	0.450902	0.011	0.487	0	0.102	0.906	0.263	0.08	0.079	0.117	0.005	0.051	0.662155	0.009	0.175277	0.058	0.346	0.026	0.162	0.032	1.747	0.002	0.126	0.171	0.01	0.014	0.08	6.1	0.01	113.64	226.07	137.5	48.18	131.31	33.7	108.06	2.85	0.82	1964.87	142.95	92.63	1675.31	184.75	119.57	132.6	221.79
76	SIB	2	73	0.455123	0.029	0.468	0.021	0.096	0.966	0.272	0.079	0.032	0.089	0.004	0.071	0.662155	0.004	0.152	0.063	0.213	0.032	0.231	0.039	2.07	0.001	0.128	0.141	0.048	0.028	0.082	5.222	0.012	76.73	296.12	188.78	80.37	186.82	37.59	126.76	2.35	0.68	2304.81	75.29	90.49	2115.57	329.43	241.02	314.73	357.5
77	SIB	1	46	0.460786	0.035	0.434	0.006	0.108	0.885	0.239	0.09	0.07	0.113	0.006	0.054	0.662155	0.00642394	0.202	0.061	0.231	0.026	0.231	0.031	1.913	0.002	0.131	0.106506	0.009	0.013	0.095	5.874	0.011	106.4	151.19	53.87	64.98	184.08	37.49	48.68	0.83	0.26	885.13	142.37	75.51	615.64	92.47	63.1	44.17	75.37
78	SIB	1	62	0.479893	0.011	0.289	0.004	0.089	0.932	0.358	0.071	0.057	0.119	0.005	0.058	0.662155	0.00642394	0.175	0.059	0.254	0.016	0.162	0.034	1.425	0.002	0.11	0.099	0.016	0.078	0.042	5.068	0.026	106.64	254.03	124.76	81.59	196.32	39.66	98.1	1.53	0.5	1783.63	168.1	166.5	1420.59	359.85	196.25	164.2	176.5
79	SIB	1	64	0.479893	0.006	0.413	0.013	0.105	0.809	0.305	0.065	0.069	0.126	0.005	0.052	0.779	0.00642394	0.175277	0.059	0.301	0.031	0.17	0.031	1.936	0.00471947	0.103	0.05	0.007	0.052	0.087	5.074	0.005	176.02	271.18	145.4	57.8	162.45	34.18	118.81	2.52	0.73	2160.28	255.26	178.55	1694.13	248.04	148.61	156.13	251.93
80	SIB	2	64	0.480818	0.011	0.438	0.041	0.074	0.903	0.254	0.095	0.038	0.084	0.006	0.047	1.112	0.004	0.175277	0.058	0.233	0.07	0.198	0.031	1.904	0.003	0.119	0.055	0.011	0.014	0.118	6.517	0.01	139.87	329.7	209.32	65.56	173.43	40.1	148.83	3.19	0.86	2706.11	170.29	141.86	2328.13	338.46	213.76	304.73	434.21
81	SIB	2	43	0.480818	0.037	0.314	0.006	0.069	0.77	0.163	0.07	0.039	0.083	0.006	0.048	0.662155	0.00642394	0.175277	0.052	0.198	0.02	0.186	0.041	1.41	0.001	0.136	0.029	0.009	0.007	0.073	5.433	0.011	147.85	226.31	112.94	73.45	196.66	41.51	86.98	1.54	0.44	1581.54	155.27	77.48	1275.81	193.01	88.08	149.91	272.42
82	SIB	2	53	0.480818	0.023	0.456	0.034	0.064	1.081	0.327	0.074	0.032	0.083	0.006	0.03	0.662155	0.00642394	0.121	0.051	0.191	0.038	0.234	0.029	1.414	0.002	0.112	0.106506	0.009	0.013	0.078	5.59	0.012	71.28	274.99	170.19	78.92	186.49	46.71	109.42	2.16	0.59	1989.6	76.14	117.87	1836.45	352.95	291.67	316.49	297.86
83	SIB	2	44	0.480818	0.02	0.431	0.025	0.086	0.92	0.349	0.085	0.053	0.082	0.005	0.036	0.662155	0.004	0.175277	0.046	0.21	0.045	0.19	0.026	1.683	0.003	0.127	0.034	0.012	0.015	0.077	4.892	0.008	74.33	221.6	132.03	71.62	162.71	35.09	83.16	1.84	0.51	1512.03	75.25	47.68	1427.9	206.58	246.92	224.1	178.64
84	SIB	1	61	0.480818	0.055	0.55	0.022	0.082	0.764	0.282	0.074	0.079	0.149	0.011	0.048	0.662155	0.006	0.175277	0.066	0.254	0.022	0.159	0.03	1.969	0.001	0.135	0.078	0.0235242	0.02	0.166	6.917	0.012	99.09	183.43	89.71	77.66	184.12	43.1	68.39	1.16	0.37	1243.46	103.84	58.27	1034.51	139.84	86.15	100.09	125.49
85	SIB	2	39	0.480818	0.019	0.451	0.045	0.073	0.691	0.19	0.053	0.086	0.109	0.005	0.069	0.662155	0.00642394	0.175277	0.092	0.341	0.023	0.2	0.046	1.635	0.00471947	0.111	0.027	0.029	0.012	0.151	5.396	0.006	176.07	223.7	128.46	49.16	151.43	33.96	106.95	2.61	0.71	1944.67	161.73	95.02	1656.98	155.84	129.67	159.59	273.52
86	SIB	2	52	0.480818	0.008	0.479	0.054	0.061	0.904	0.212	0.069	0.049	0.108	0.007	0.047	0.662155	0.005	0.175277	0.066	0.332	0.03	0.235	0.03	2.057	0.003	0.134	0.106506	0.01	0.012	0.132	6.092	0.012	99.94	216.18	121.8	57.58	149.87	35.45	91.85	2.12	0.61	1670	119.44	84.45	1430.88	252.01	180.87	172.04	186.49
87	SIB	2	34	0.480818	0.01	0.339	0.054	0.07	0.872	0.417	0.082	0.04	0.118	0.005	0.041	0.662155	0.006	0.234	0.058	0.26	0.014	0.232	0.025	1.337	0.002	0.101	0.106506	0.005	0.018	0.057	5.445	0.007	110.12	213.75	103.6	65.42	173.64	37.53	89.14	1.58	0.51	1620.89	162.05	111.59	1266.13	209.36	67.02	66.11	183.74
88	SIB	2	54	0.480818	0.085	0.376	0.026	0.054	0.881	0.309	0.082	0.027	0.069	0.005	0.037	0.662155	0.00642394	0.097	0.051	0.17	0.028	0.216	0.027	1.639	0.003	0.105	0.195	0.023	0.026	0.065	5.393	0.012	50.12	208.24	120.92	77.06	173.51	36.81	76.57	1.57	0.44	1392.24	51.7	51.29	1299.8	223.78	218.96	211.89	173.94
89	SIB	1	67	0.491354	0.025	0.471	0.001	0.091	1.152	0.288	0.088	0.063	0.124	0.006	0.036	0.662155	0.002	0.162	0.05	0.25	0.028	0.181	0.032	1.463	0.002	0.156	0.031	0.006	0.035	0.077	6.297	0.018	64.17	201.45	122.92	59.44	142.17	32.23	83.69	2.07	0.59	1521.65	88.07	66.41	1343.01	206.65	194.49	177.96	190.43
90	SIB	1	66	0.491354	0.013	0.359	0.001	0.068	0.99	0.251	0.096	0.062	0.127	0.005	0.056	0.662155	0.00642394	0.175277	0.061	0.312	0.041	0.217	0.029	1.284	0.001	0.13	0.028	0.002	0.016	0.049	5.492	0.019	111.85	202.14	109.95	56.71	148.76	34.1	82.23	1.94	0.55	1495.13	145.69	74.1	1247.7	163.72	125.65	127.84	206.84
91	SIB	2	63	0.491692	0.028	0.482	0.015	0.092	0.941	0.355	0.078	0.074	0.085	0.006	0.045	0.662155	0.006	0.175277	0.076	0.308	0.018	0.213	0.024	1.339	0.003	0.128	0.106506	0.009	0.012	0.068	6.22	0.018	172.37	307.65	172.38	61.33	174.56	40.97	133	2.81	0.76	2418.32	227.51	166.7	2015.83	344.7	185.97	261.6	374.54
92	SIB	1	67	0.495297	0.047	0.441	0.008	0.123	0.908	0.253	0.071	0.041	0.076	0.008	0.044	0.662155	0.002	0.12	0.036	0.225	0.029	0.201	0.033	1.558	0.002	0.118	0.055	0.008	0.015	0.084	5.327	0.011	84.97	252.27	151.7	71.52	171.1	32.98	114.72	2.12	0.67	2085.93	98.82	115.15	1887.77	321.94	180.03	234.63	298.57
93	SIB	2	64	0.500752	0.005	0.365	0.063	0.051	0.844	0.22	0.086	0.038	0.091	0.007	0.041	0.662155	0.00642394	0.124	0.056	0.239	0.023	0.296	0.043	1.559	0.025	0.115	0.429	0.075	0.051	0.067	5.942	0.012	51.92	267.77	147.3	104.04	227.35	45.7	91.85	1.42	0.4	1670.08	15.25	56.61	1617.13	278.2	227.25	251.62	213.6
94	SIB	2	61	0.500752	0.035	0.44	0.066	0.054	0.833	0.243	0.059	0.032	0.058	0.006	0.035	0.662155	0.005	0.175277	0.05	0.199	0.025	0.246	0.03	2.253	0.002	0.074	0.057	0.012	0.011	0.123	5.418	0.008	80.15	208.37	110.59	76.68	174.21	35.13	74.15	1.44	0.43	1348.15	97.14	57.45	1213.57	255.38	227.1	211.71	140.22
95	SIB	2	60	0.500752	0.031	0.606	0.035	0.077	1.012	0.31	0.075	0.067	0.127	0.005	0.067	0.515	0.00642394	0.175277	0.049	0.278	0.017	0.217	0.025	3.042	0.002	0.107	0.106506	0.003	0.01	0.2	13.394	0.025	133.79	226.9	132.9	54.2	160.63	37.07	96.37	2.45	0.6	1752.21	151.82	107.35	1458.38	191.18	158.47	193.87	301.31
96	SIB	2	63	0.500752	0.009	0.328	0.025	0.092	0.908	0.255	0.08	0.03	0.061	0.006	0.045	0.662155	0.003	0.237	0.062	0.198	0.019	0.209	0.037	1.475	0.003	0.184	0.039	0.012	0.011	0.049	4.821	0.012	140.64	284.03	168.42	63.18	156.34	36.04	133.93	2.67	0.86	2435.23	205.81	170.55	2056.57	318.22	144.68	195.78	317.44
97	SIB	1	70	0.529798	0.032	0.794	0.002	0.124	0.822	0.313	0.1	0.093	0.127	0.007	0.049	0.667	0.00642394	0.175277	0.063	0.324	0.019	0.239	0.023	2.531	0.002	0.134	0.034	0.0235242	0.01	0.089	9.544	0.009	99.01	96.26	38.29	38.56	105.15	23.31	44.99	0.99	0.43	818	145.7	57.59	534.69	123.32	73.44	18.45	21.52
98	SIB	2	60	0.544977	0.051	0.336	0.026	0.051	0.886	0.289	0.068	0.074	0.134	0.009	0.056	0.443	0.005	0.169	0.08	0.242	0.069	0.224	0.034	1.271	0.001	0.091	0.119	0.012	0.042	0.054	5.679	0.019	85.65	177.22	83.44	66.42	146.69	29.67	69.16	1.26	0.47	1257.48	113.49	61.53	1017.37	208.02	135.52	84.82	30.57
99	SIB	1	45	0.564247	0.026	0.35	0.017	0.104	0.993	0.281	0.093	0.048	0.144	0.008	0.044	0.662155	0.003	0.175277	0.051	0.293	0.02	0.188	0.026	1.632	0.001	0.116	0.13	0.015	0.025	0.067	5.139	0.008	47.03	216.55	133.38	68.41	156.92	37.97	86.08	1.95	0.55	1565.14	49.15	63.36	1449.68	214.66	180.62	212.73	235.51
100	SIB	1	48	0.564247	0.013	0.375	0.016	0.069	0.848	0.197	0.09	0.068	0.11	0.005	0.038	0.662155	0.004	0.147	0.059	0.252	0.032	0.19	0.027	1.498	0.001	0.12	0.079	0.01	0.012	0.076	5.695	0.008	66.5	271.27	178.69	66.23	160.46	39.74	117.88	2.7	0.73	2143.36	79.92	88.12	1908.57	277.23	238.18	273.36	305.49
101	SIB	2	66	0.568257	0.019	0.417	0.026	0.068	0.938	0.261	0.072	0.034	0.074	0.007	0.05	0.662155	0.00642394	0.132	0.067	0.148	0.024	0.163	0.021	1.531	0.002	0.066	0.106506	0.008	0.015	0.051	4.42	0.008	92.5	257.14	150.37	77.29	195.26	40.38	107.27	1.95	0.55	1950.39	120.32	133.4	1705.59	365.68	253.89	275.13	309.54
102	SIB	2	65	0.568257	0.027	0.532	0.01	0.086	0.865	0.261	0.096	0.085	0.157	0.008	0.061	0.662155	0.004	0.135	0.072	0.346	0.02	0.201	0.032	2.088	0.002	0.125	0.067	0.016	0.01	0.045	6.344	0.006	49.42	198.52	108.19	76.86	174.56	38.87	70.45	1.41	0.4	1280.88	42.03	41.9	1172.02	165.01	151.99	133.72	129
103	SIB	1	64	0.58762	0.019	0.41	0.012	0.089	0.961	0.217	0.07	0.049	0.124	0.008	0.058	0.662155	0.00642394	0.167	0.043	0.297	0.024	0.261	0.027	1.384	0.002	0.151	0.093	0.028	0.027	0.078	6.631	0.016	78.96	227.43	133.23	67.44	164.7	36.86	93.6	1.98	0.57	1701.94	104.5	87.44	1484.92	260.26	200.33	205.07	223.22
104	SIB	2	42	0.599889	0.026	0.472	0.023	0.064	0.833	0.417	0.074	0.048	0.079	0.007	0.044	0.662155	0.00642394	0.105	0.05	0.165	0.055	0.219	0.035	2.244	0.002	0.12	0.106506	0.009	0.012	0.104	5.431	0.012	57.06	193.68	111.97	63.37	159.91	38.6	76.78	1.77	0.48	1396.01	58.8	75.15	1262.06	233.03	166.05	202.4	237.69
105	SIB	2	70	0.616943	0.018	0.455	0.05	0.069	0.891	0.305	0.087	0.058	0.14	0.007	0.051	0.662155	0.001	0.175277	0.06	0.286	0.035	0.133	0.033	1.228	0.002	0.078	0.106506	0.008	0.021	0.103	6.044	0.01	157.42	263.06	158.8	55.7	150.15	40.35	117.9	2.85	0.79	2143.77	188.48	143	1804.47	274.69	213.91	245.83	331.58
106	SIB	2	47	0.640697	0.004	0.369	0.017	0.057	0.806	0.401	0.096	0.037	0.071	0.005	0.039	0.406	0.00642394	0.13	0.041	0.204	0.015	0.199	0.038	1.411	0.001	0.119	0.041	0.003	0.008	0.058	5.613	0.006	63.88	240.93	151.78	73.52	161.47	31.67	97.15	2.06	0.6	1766.4	77.8	73.7	1606.17	343.81	354.64	314.15	214.08
107	SIB	1	70	0.648654	0.058	0.571	0.009	0.097	0.929	0.232	0.088	0.07	0.139	0.006	0.038	0.851	0.009	0.175277	0.05	0.347	0.032	0.239	0.024	2.344	0.001	0.147	0.111	0.0235242	0.024	0.108	8.85	0.011	153.92	228.51	118.66	59.91	164.05	39.2	100.99	1.98	0.62	1836.35	199.5	114.32	1452.22	211.25	84.19	103.76	203.65
108	SIB	2	63	0.667215	0.006	0.409	0.025	0.068	0.757	0.467	0.076	0.038	0.075	0.006	0.028	0.662155	0.006	0.175277	0.043	0.232	0.019	0.205	0.03	1.167	0.002	0.13	0.106506	0.003	0.009	0.063	5.936	0.019	135.38	281.67	179.18	57.04	155.54	39.78	128.32	3.14	0.82	2333.13	175.57	127.31	2035.7	285.47	194.53	286.37	406.86
109	SIB	1	68	0.66804	0.056	0.597	0.026	0.102	0.925	0.241	0.083	0.051	0.116	0.009	0.044	0.662155	0.008	0.175277	0.069	0.269	0.023	0.21	0.032	2.978	0.002	0.159	0.106506	0.013	0.018	0.182	6.845	0.012	162.5	207.03	116.95	58.46	151.75	36.44	99.31	2	0.65	1805.75	194.7	91.55	1474.7	133.49	64.96	79.45	183.05
110	SIB	1	57	0.693526	0.04	0.357	0.001	0.083	0.894	0.267	0.069	0.06	0.138	0.006	0.048	0.662155	0.004	0.154	0.066	0.262	0.044	0.194	0.039	2.212	0.001	0.058	0.06	0.029	0.023	0.103	5.787	0.011	81.86	216.34	122.88	71.13	179.98	39.84	83.35	1.73	0.46	1515.59	80.24	49.93	1333.49	196.47	136.31	190.95	256.54
111	SIB	2	70	0.709314	0.018	0.358	0.025	0.066	0.947	0.246	0.089	0.036	0.055	0.005	0.037	0.662155	0.003	0.175277	0.055	0.194	0.02	0.182	0.022	1.111	0.002	0.088	0.04	0.009	0.017	0.05	4.91	0.01	98.92	215.54	103.58	75.93	174.96	34.36	79.82	1.36	0.46	1451.28	130.09	94.49	1228.89	312.95	205.35	164.88	83.05
112	SIB	2	70	0.709314	0.003	0.472	0.047	0.056	0.791	0.334	0.067	0.048	0.066	0.006	0.051	0.662155	0.002	0.175277	0.066	0.192	0.024	0.199	0.035	2.259	0.003	0.144	0.106506	0.008	0.009	0.129	5.542	0.017	116.5	270.38	174.36	67.89	169.83	37.7	115.63	2.57	0.68	2102.41	145.76	110.7	1884.29	268.36	285.01	316.14	324.39
113	SIB	1	49	0.719497	0.047	0.461	0.012	0.093	0.93	0.246	0.086	0.068	0.145	0.007	0.054	0.662155	0.001	0.268	0.073	0.306	0.041	0.208	0.026	1.263	0.001	0.091	0.106506	0.009	0.006	0.112	6.451	0.011	90.18	165.98	72.14	60.58	158.2	36	58.93	1.19	0.37	1071.55	134.77	92.22	770.28	168.68	91.02	48.68	98.97
114	SIB	1	35	0.719497	0.002	0.434	0.006	0.103	0.931	0.254	0.082	0.062	0.113	0.008	0.04	0.662155	0.006	0.175277	0.058	0.224	0.022	0.214	0.029	2.006	0.002	0.112	0.106506	0.011	0.017	0.053	5.163	0.004	114.3	235.74	130.67	54.51	152.89	37.91	104.23	2.4	0.68	1895.26	158.66	105.34	1567.97	238.66	117.64	149.14	223.96
115	SIB	1	48	0.719497	0.034	0.475	0.014	0.126	1.033	0.21	0.097	0.059	0.152	0.008	0.044	0.488	0.009	0.175277	0.061	0.338	0.04	0.174	0.043	1.255	0.001	0.155	0.055	0.009	0.016	0.063	5.515	0.007	141.69	233.09	135.87	51.97	152.54	37.53	103.14	2.61	0.68	1875.29	159.96	92.69	1560.03	173.61	100.54	148.12	286.88
116	SIB	2	83	0.726214	0.026	0.435	0.032	0.058	1.124	0.389	0.071	0.039	0.069	0.006	0.056	0.874	0.004	0.106	0.063	0.262	0.015	0.228	0.031	1.826	0.003	0.132	0.038	0.006	0.017	0.067	5.249	0.008	58.59	201.85	108.6	75.41	170.22	32.08	72.27	1.44	0.42	1314.04	44.35	48.27	1268.11	272.1	234.63	214.19	122.51
117	SIB	1	62	0.734318	0.021	0.443	0.012	0.071	0.908	0.279	0.084	0.068	0.124	0.013	0.054	0.662155	0.003	0.175277	0.051	0.21	0.029	0.199	0.038	2.711	0.003	0.091	0.106506	0.008	0.015	0.128	5.527	0.015	94.45	164.2	76.98	51.98	152.18	33.21	74.34	1.48	0.49	1351.69	158.5	108.6	1012.16	215.24	115.59	42.7	104.17
118	SIB	2	51	0.735729	0.014	0.523	0.026	0.068	0.823	0.266	0.074	0.048	0.071	0.006	0.044	0.662155	0.005	0.175277	0.061	0.205	0.016	0.2	0.038	1.573	0.002	0.096	0.106506	0.009	0.008	0.09	5.874	0.009	150.94	275.38	169.07	69.2	167.79	39.62	118.75	2.44	0.71	2159.25	173.75	121.54	1877.31	306.71	245.84	295.15	325.1
119	SIB	1	57	0.744857	0.025	0.384	0.054	0.099	0.86	0.246	0.084	0.063	0.137	0.005	0.045	0.662155	0.004	0.175277	0.061	0.274	0.035	0.288	0.047	2.281	0.001	0.179	0.1	0.025	0.025	0.112	5.978	0.008	90.45	217.21	101.46	89	203.46	49.12	78.5	1.14	0.39	1427.38	95.89	85.99	1252.46	176.21	72.54	98.62	119.88
120	SIB	2	56	0.781961	0.028	0.302	0.036	0.093	0.984	0.226	0.104	0.04	0.117	0.004	0.059	0.662155	0.00642394	0.142	0.055	0.241	0.045	0.197	0.032	1.109	0.001	0.127	0.128	0.044	0.026	0.05	5.384	0.009	75.84	262.1	164.09	70.53	172.57	39.67	111.17	2.33	0.64	2021.4	86.21	86.99	1800.56	323.91	256.07	283.43	305.32
121	SIB	2	51	0.827248	0.053	0.542	0.044	0.11	0.912	0.315	0.119	0.065	0.082	0.01	0.05	0.662155	0.011	0.175277	0.052	0.2	0.063	0.198	0.046	2.766	0.006	0.117	0.106506	0.005	0.008	0.118	5.045	0.009	117.9	243.69	128.96	82.38	203.15	46.77	87.38	1.57	0.43	1588.74	105.45	95.05	1363.02	246.87	197.77	192.5	184.66
122	SIB	2	60	0.833657	0.01	0.487	0.025	0.058	1.011	0.37	0.069	0.065	0.098	0.009	0.041	0.662155	0.002	0.193	0.049	0.222	0.023	0.204	0.03	1.299	0.003	0.09	0.054	0.004	0.01	0.073	5.851	0.006	66.15	248.31	155.95	70.41	170.36	38.5	96.51	2.21	0.57	1754.88	61.88	68.31	1609.32	300.41	302.93	310.7	276.24
123	SIB	1	57	0.860504	0.018	0.373	0.03	0.073	1.05	0.254	0.095	0.053	0.143	0.007	0.057	0.662155	0.003	0.228	0.097	0.318	0.016	0.168	0.024	1.325	0.002	0.131	0.029	0.01	0.013	0.038	5.895	0.018	94.25	216.5	138.31	52.08	137.36	30.91	95.33	2.66	0.69	1733.39	118.03	98.49	1546.14	225.16	211.09	231.23	282.6
124	SIB	1	56	0.862156	0.019	0.604	0.013	0.099	0.97	0.269	0.08	0.057	0.103	0.008	0.045	0.741	0.003	0.175277	0.088	0.262	0.019	0.226	0.037	2.271	0.002	0.146	0.021	0.006	0.011	0.157	7.241	0.006	104.33	210.55	136.15	43.67	124.62	29.42	101.21	3.12	0.81	1840.27	140.13	105.47	1615.81	158.64	122.15	187.23	312.39
125	SIB	1	60	0.898642	0.022	0.243	0.064	0.065	0.929	0.228	0.065	0.041	0.091	0.018	0.041	0.662155	0.005	0.099	0.05	0.225	0.035	0.239	0.043	1.18	0.032	0.107	0.669	0.224	0.072	0.041	5.87	0.014	60.88	230.28	136.55	77.65	167.83	37.85	95.98	1.76	0.57	1745.19	73.33	57.97	1592.64	224.58	168.86	204.29	197.67
126	SIB	1	72	0.955203	0.031	0.532	0.009	0.121	0.928	0.291	0.088	0.086	0.117	0.006	0.063	0.662155	0.00642394	0.175277	0.07	0.324	0.032	0.245	0.027	1.908	0.003	0.126	0.106506	0.015	0.013	0.116	6.895	0.009	121.54	181.31	90.11	66.35	159.92	37.89	70.82	1.36	0.44	1287.75	121.34	60.04	1096.08	128.35	77.2	82.37	102.85
127	SIB	2	62	0.957035	0.038	0.535	0.033	0.103	0.839	0.281	0.077	0.082	0.143	0.006	0.068	0.662155	0.00642394	0.175277	0.073	0.347	0.024	0.175	0.03	1.815	0.002	0.118	0.106506	0.014	0.013	0.107	6.644	0.017	124.63	278.74	159.35	82.72	195.11	42.25	107.22	1.93	0.55	1949.62	127.76	108.68	1663.47	284.37	230.57	239.88	259.8
128	SIB	1	72	0.957035	0.059	0.435	0.015	0.122	0.917	0.315	0.084	0.054	0.087	0.007	0.045	0.714	0.005	0.146	0.058	0.254	0.052	0.245	0.035	1.687	0.002	0.118	0.12	0.0235242	0.022	0.091	7.836	0.04	87.88	150.21	73.03	58	149.83	30.48	63.65	1.26	0.42	1157.31	125.21	75.07	878.01	137.05	95.98	66.5	99.97
129	SIB	2	79	0.99023	0.031	0.371	0.067	0.06	0.727	0.249	0.06	0.039	0.071	0.006	0.053	0.662155	0.00642394	0.087	0.068	0.213	0.037	0.204	0.037	2.197	0.004	0.097	0.038	0.008	0.009	0.094	5.906	0.01	62.41	167.61	89.54	59.06	135.97	26.12	75.02	1.52	0.55	1364.14	82.77	67.93	1234.28	251.96	158.99	141.67	99.38
130	SIB	2	75	0.99023	0.022	0.281	0.013	0.073	0.854	0.237	0.073	0.04	0.057	0.008	0.061	0.662155	0.006	0.175277	0.054	0.167	0.041	0.246	0.047	1.925	0.001	0.117	0.05	0.015	0.026	0.083	5.326	0.015	103.24	220.69	110.51	75.55	179.48	38.67	82.73	1.46	0.46	1504.31	123.38	66.61	1305.38	267.28	175.45	181.88	139.64
131	SIB	2	71	0.996514	0.035	0.35	0.013	0.075	0.9	0.48	0.075	0.034	0.057	0.004	0.03	0.662155	0.00642394	0.13	0.054	0.195	0.067	0.225	0.039	1.28	0.003	0.108	0.106506	0.008	0.004	0.061	5.913	0.015	77.69	187.5	101.34	60.77	147.62	31.06	76.62	1.67	0.52	1393.11	90.17	69.71	1260.28	248.24	166.17	204.77	178.15
132	SIB	1	65	1.0399	0.023	0.493	0.01	0.058	0.815	0.245	0.069	0.041	0.103	0.007	0.048	0.662155	0.001	0.175277	0.056	0.227	0.052	0.259	0.049	2.393	0.00471947	0.132	0.106506	0.004	0.017	0.151	8.125	0.02	54.44	176.51	125.57	38.95	122.37	24.98	83.45	3.22	0.68	1517.25	71.34	52.87	1422.21	135.23	126.88	229.74	365.06
133	SIB	2	51	1.04235	0.064	0.492	0.028	0.069	0.673	0.172	0.1	0.086	0.109	0.01	0.041	0.662155	0.00642394	0.175277	0.061	0.273	0.022	0.23	0.036	2.392	0.00471947	0.114	0.106506	0.023	0.0308667	0.305	5.554	0.009	529.63	332.09	165.87	70.66	204.76	57.81	164.89	2.35	0.81	2998.15	464.2	224.54	2295.63	171.66	65.68	198.35	411.09
134	SIB	2	71	1.08405	0.033	0.505	0.022	0.076	0.737	0.216	0.074	0.071	0.134	0.007	0.084	0.662155	0.00642394	0.175277	0.086	0.312	0.018	0.184	0.036	1.945	0.002	0.058	0.106506	0.007	0.007	0.103	7.821	0.014	165.79	298.42	177.52	55.6	155.74	37.54	141.23	3.19	0.91	2567.97	203.63	183.18	2179.16	339.54	170.3	232.82	384.5
135	SIB	2	67	1.08538	0.019	0.426	0.035	0.078	0.841	0.356	0.081	0.041	0.102	0.005	0.042	0.662155	0.006	0.175277	0.055	0.244	0.016	0.2	0.028	2.122	0.004	0.135	0.106506	0.009	0.007	0.101	4.642	0.007	113.21	220.98	121.75	67.79	176.25	39.55	89.31	1.8	0.51	1623.97	132.72	70.72	1402.42	195.4	135.42	172.9	266.36
136	SIB	1	42	1.09955	0.01	0.448	0.027	0.096	0.892	0.278	0.092	0.055	0.125	0.007	0.039	0.662155	0.00642394	0.112	0.05	0.247	0.019	0.292	0.031	1.862	0.002	0.158	0.106506	0.011	0.013	0.094	6.397	0.012	86.33	140.5	39.94	60.05	166.85	38.81	44.06	0.67	0.26	801.18	118.7	80.96	498.25	168.35	34.28	0	27.12
137	SIB	1	43	1.09955	0.008	0.458	0.024	0.118	0.974	0.278	0.086	0.085	0.114	0.007	0.064	0.662155	0.00642394	0.205	0.043	0.271	0.049	0.149	0.041	1.76	0.002	0.128	0.032	0.02	0.013	0.091	5.59	0.004	63.42	183.69	114.55	45.03	120.55	28.39	85.46	2.54	0.71	1553.82	88.52	66.21	1388.66	175.17	125.16	152.89	217.31
138	SIB	2	54	1.12216	0.028	0.435	0.047	0.065	0.809	0.285	0.065	0.056	0.118	0.005	0.04	0.662155	0.004	0.13	0.059	0.255	0.038	0.187	0.037	2.003	0.002	0.097	0.048	0.005	0.011	0.09	5.12	0.01	96.34	242.95	127.41	78.47	190.46	36.68	98.23	1.62	0.52	1786.01	118.62	109.18	1500.18	286.33	149.4	161.79	214.72
139	SIB	2	56	1.19461	0.013	0.414	0.047	0.073	0.946	0.411	0.083	0.047	0.088	0.005	0.049	0.662155	0.00642394	0.175277	0.058	0.165	0.01	0.258	0.027	1.207	0.003	0.116	0.106506	0.01	0.013	0.071	4.78	0.007	88.39	280.39	167.71	86.67	202.26	49.99	109.6	1.93	0.54	1992.82	82.43	103.48	1813.47	338.06	306.23	301.27	263.46
140	SIB	1	51	1.19675	0.014	0.498	0.063	0.091	0.945	0.231	0.091	0.077	0.105	0.008	0.044	0.662155	0.006	0.175277	0.054	0.32	0.019	0.279	0.028	1.585	0.002	0.09	0.027	0.024	0.008	0.085	6.032	0.006	257.62	289.9	142.68	56.75	167.37	46.68	129.54	2.51	0.77	2355.33	320.3	167.83	1828.12	190.17	25.01	71.07	237.41
141	SIB	2	65	1.22023	0.016	0.405	0.027	0.11	0.804	0.219	0.062	0.063	0.129	0.008	0.043	0.662155	0.007	0.175277	0.045	0.299	0.021	0.24	0.03	2.015	0.026	0.141	0.562	0.321	0.069	0.143	5.452	0.009	147.62	249.66	136.91	64.38	165.85	38.1	106.14	2.13	0.64	1929.9	195.39	127.39	1531.73	303.53	188.84	191.73	222.02
142	SIB	2	57	1.25984	0.031	0.613	0.017	0.1	0.897	0.302	0.084	0.056	0.127	0.007	0.058	0.662155	0.002	0.175277	0.068	0.253	0.018	0.188	0.034	2.23	0.002	0.099	0.106506	0.008	0.012	0.102	5.88	0.021	113.1	220.37	130.83	60.95	172.47	42.96	95.41	2.15	0.55	1734.78	124.37	103.74	1504.93	201.43	142.51	203.68	340.18
143	SIB	1	72	1.27539	0	0.393	0.048	0.067	0.855	0.189	0.08	0.052	0.084	0.008	0.042	0.662155	0.011	0.175277	0.066	0.24	0.052	0.156	0.036	1.188	0.001	0.13	0.036	0.012	0.012	0.103	4.916	0.005	285.14	314.49	177.35	51.47	162.44	38.05	153.51	3.45	0.95	2791.19	305.56	163.05	2330.96	257.24	59.25	184.73	394.75
144	SIB	1	57	1.30246	0.008	0.464	0.004	0.058	0.997	0.272	0.066	0.062	0.118	0.006	0.038	0.662155	0.003	0.175277	0.043	0.221	0.037	0.235	0.04	4.237	0.002	0.285	0.035	0.021	0.017	0.142	5.457	0.005	81.01	295.29	200.72	72.72	174.35	42.53	130.73	2.76	0.75	2376.99	82.2	103.2	2210.16	316.52	308.49	363.28	395.01
145	SIB	2	69	1.36072	0.007	0.503	0.044	0.077	0.893	0.256	0.088	0.066	0.095	0.008	0.069	0.662155	0.00642394	0.175277	0.065	0.28	0.03	0.247	0.022	3.822	0.002	0.098	0.106506	0.011	0.01	0.156	6.153	0.011	145.24	285.63	164.17	64.5	173.9	40.66	124.24	2.55	0.71	2258.99	193.62	143.31	1865.51	265.37	148.28	171.44	286.69
146	SIB	1	64	1.42872	0.004	0.326	0.05	0.069	0.872	0.238	0.122	0.046	0.132	0.005	0.037	0.488	0.00642394	0.175277	0.045	0.281	0.012	0.193	0.026	1.032	0.002	0.141	0.095	0.0235242	0.017	0.049	5.854	0.013	116.09	282.93	171.97	60.24	155.38	41.72	128.52	2.85	0.83	2336.84	181.18	136.7	1998.87	242.21	141.23	181.27	290.94
147	SIB	1	73	1.45793	0.008	0.488	0.022	0.092	0.744	0.218	0.092	0.079	0.136	0.008	0.054	0.662155	0.008	0.175277	0.082	0.319	0.042	0.237	0.039	2.929	0.003	0.113	0.055	0.01	0.016	0.11	5.035	0.015	177.83	243.25	124.85	49.56	148.4	37.78	109.19	2.52	0.74	1985.41	224.88	114.8	1609.61	202.77	59.91	98.71	231.48
148	SIB	1	57	1.46461	0.028	0.502	0.003	0.08	0.955	0.335	0.093	0.059	0.115	0.008	0.041	0.883	0.01	0.175277	0.05	0.236	0.034	0.2	0.035	1.495	0.001	0.131	0.031	0.011	0.014	0.086	4.932	0.004	106.63	206.45	111.38	56.2	149.01	35.88	86.94	1.98	0.58	1580.76	145.84	56.58	1286.26	149.5	94.55	102.32	153.33
149	SIB	2	61	1.47271	0.027	0.496	0.044	0.108	0.918	0.26	0.073	0.049	0.123	0.007	0.051	0.662155	0.005	0.175277	0.069	0.273	0.017	0.168	0.034	1.505	0.002	0.105	0.067	0.014	0.01	0.071	6.149	0.015	150.51	295.81	180.57	72.37	193.88	40.96	129.53	2.5	0.67	2355.25	161.5	118.47	2013.66	260.25	152.14	255.87	414.62
150	SIB	1	76	1.47803	0.056	0.794	0.003	0.154	1.173	0.275	0.092	0.088	0.163	0.008	0.059	0.662155	0.018	0.175277	0.058	0.327	0.051	0.233	0.035	2.6	0.002	0.107	0.06	0.009	0.016	0.132	8.701	0.01	153.83	221.88	108.06	76.45	188.03	41.02	84.92	1.41	0.45	1544.13	164.13	54.23	1260.23	178.7	84.01	117.89	167.91
151	SIB	2	60	1.48453	0.009	0.631	0.014	0.072	0.891	0.286	0.097	0.048	0.065	0.006	0.064	0.662155	0.006	0.215	0.068	0.216	0.042	0.264	0.036	5.711	0.003	0.114	0.041	0.013	0.016	0.217	5.192	0.009	70.11	177.3	89.7	62.17	151.96	33.18	64.58	1.44	0.42	1174.15	95.57	48.65	1011.48	207.56	144.29	164.71	150.91
152	SIB	1	74	1.48736	0.009	0.332	0.012	0.125	0.878	0.299	0.08	0.043	0.1	0.007	0.047	0.662155	0.015	0.175277	0.056	0.226	0.05	0.175	0.036	0.908	0.009	0.124	0.18	0.096	0.037	0.071	5.206	0.011	163.41	211.26	84.25	79.1	198.54	40.23	79.51	1.07	0.4	1445.78	238.96	91.49	988.67	158.93	27.53	44.57	127.25
153	SIB	1	84	1.4924	0.051	0.558	0	0.077	1.055	0.271	0.065	0.054	0.114	0.011	0.071	1.502	0.003	0.229	0.107	0.311	0.021	0.232	0.032	1.942	0.004	0.141	0.042	0.022	0.027	0.104	4.451	0.023	99.64	175.56	93.51	58.93	140.68	30.26	80.94	1.59	0.58	1471.73	100.56	98.55	1354.26	274.96	210.16	183.54	114.85
154	SIB	2	78	1.51111	0.022	0.413	0.016	0.091	0.89	0.219	0.079	0.054	0.131	0.006	0.072	0.662155	0.006	0.175277	0.065	0.248	0.031	0.199	0.028	1.68	0.003	0.094	0.066	0.029	0.021	0.064	5.267	0.007	78.73	235.14	142.5	67.86	170.87	37.27	96.72	2.1	0.57	1758.56	100.31	75.68	1572.83	242.47	202.27	245.89	278.92
155	SIB	2	66	1.52251	0.033	0.524	0.046	0.098	0.888	0.327	0.091	0.071	0.12	0.006	0.039	0.496	0.00642394	0.217	0.05	0.266	0.022	0.236	0.032	1.849	0.009	0.125	0.189	0.028	0.035	0.077	8.536	0.018	124.43	228.31	133.93	54.1	148.96	34.23	103.52	2.48	0.69	1882.22	194.2	135.86	1528.86	187.36	153.98	174.86	299.38
156	SIB	1	62	1.58917	0.022	0.348	0	0.05	0.835	0.292	0.08	0.052	0.11	0.007	0.07	0.662155	0.00642394	0.163	0.075	0.292	0.086	0.188	0.036	2.492	0.001	0.099	0.051	0.02	0.019	0.066	4.848	0.009	62.77	188.83	114.85	55.22	135.2	30.26	79.96	2.08	0.59	1453.85	80.36	57.16	1319.37	193.89	183.64	188.44	193.24
157	SIB	2	69	1.68562	0.036	0.362	0.004	0.054	0.885	0.303	0.078	0.032	0.069	0.007	0.047	0.514	0.00642394	0.167	0.056	0.206	0.027	0.23	0.029	1.76	0.001	0.085	0.084	0.0235242	0.019	0.075	5.731	0.011	116.47	226.75	116.22	68.81	171.55	36.26	90.6	1.69	0.53	1647.29	168.06	116.79	1346.11	315.94	187.76	195.35	199.15
158	SIB	1	23	1.68829	0.027	0.323	0.024	0.078	0.959	0.28	0.09	0.041	0.065	0.006	0.035	0.662155	0.00642394	0.178	0.037	0.188	0.02	0.164	0.034	1.263	0.002	0.152	0.05	0.016	0.01	0.065	6.02	0.008	49	218.1	129.05	75.81	156.25	36.76	80.2	1.7	0.51	1458.21	59.93	75.08	1379.03	227.87	247.6	207.8	124.92
159	SIB	1	60	1.99754	0.012	0.392	0.009	0.101	1.077	0.235	0.078	0.061	0.11	0.007	0.042	0.645	0.00642394	0.263	0.059	0.284	0.032	0.218	0.037	1.502	0.001	0.142	0.035	0.008	0.021	0.047	5.917	0.013	100.08	224.62	123.77	54.26	144.16	31.1	89.75	2.28	0.62	1631.86	155.21	109.97	1353.96	256.5	164.27	193.85	239.11
160	SIB	1	68	2.26223	0.015	0.392	0.041	0.112	0.765	0.212	0.092	0.06	0.147	0.007	0.061	0.662155	0.00642394	0.175277	0.081	0.266	0.021	0.181	0.025	1.93	0.001	0.053	0.051	0.012	0.007	0.098	6.259	0.011	92.89	241.81	143.56	61.01	164.63	41.65	110.12	2.35	0.67	2002.37	99.81	111.24	1775.41	195.92	67.21	146.45	307.86
161	SIB	1	56	2.29227	0.142	0.521	0.026	0.123	0.77	0.281	0.107	0.059	0.158	0.009	0.043	0.702	0.007	0.175277	0.064	0.321	0.021	0.142	0.017	1.985	0.001	0.0915526	0.106506	0.01	0.012	0.153	5.348	0.007	134.33	286.06	176.05	77.65	190.39	48.15	124.86	2.27	0.66	2270.21	149.73	117.72	1961.13	239.75	185.3	247.33	345.25
162	SIB	1	55	2.33569	0.023	0.438	0.025	0.061	0.989	0.203	0.084	0.057	0.126	0.007	0.05	0.662155	0.00642394	0.164	0.069	0.28	0.037	0.233	0.041	1.491	0.002	0.113	0.112	0.026	0.014	0.118	6.608	0.023	78.85	183.08	96.3	58.17	147.27	35.23	69.79	1.66	0.47	1269.04	112.84	78.78	1028.88	196.83	154.63	134.97	133.62
163	SIB	2	70	2.55983	0.029	0.568	0.028	0.088	0.88	0.192	0.076	0.054	0.098	0.007	0.048	0.843	0.015	0.175277	0.076	0.256	0.062	0.226	0.047	2.8	0.003	0.094	0.106506	0.005	0.016	0.139	9.727	0.009	174.66	252.14	141.47	69.52	178.27	37.3	113.51	2.04	0.64	2063.89	182.27	99.29	1739.94	278.96	188.97	213.21	255.93
164	SIB	2	75	2.67675	0.024	0.424	0.011	0.086	0.985	0.299	0.073	0.046	0.071	0.007	0.044	0.662155	0.005	0.168	0.058	0.223	0.018	0.262	0.022	0.9	0.002	0.116	0.106506	0.006	0.018	0.047	6.113	0.035	95.3	244.79	117.58	99.95	207.74	41.45	81.11	1.18	0.39	1474.89	106.39	63.81	1342.15	241.07	213.62	156.37	52.39
165	SIB	2	90	2.7563	0.08	0.454	0.011	0.165	1.114	0.324	0.098	0.062	0.069	0.01	0.041	0.662155	0.009	0.175277	0.053	0.258	0.037	0.205	0.033	1.512	0.002	0.128	0.06	0.0235242	0.016	0.081	6.897	0.014	122.72	178.09	80.17	59.06	151.37	33.85	69.26	1.36	0.46	1259.32	148.75	75.81	1015.71	195.46	87.42	100.87	108.72
166	SIB	1	64	2.7907	0.014	0.485	0.019	0.114	0.72	0.261	0.083	0.082	0.112	0.005	0.072	0.492	0.00642394	0.175277	0.064	0.312	0.025	0.171	0.035	2.076	0.002	0.132	0.029	0.0235242	0.0308667	0.102	9.132	0.003	336.57	178.86	62.27	44.9	135.28	29.95	79.19	1.39	0.59	1439.94	328.58	84.57	981.31	118.95	27.87	0	13.77
167	SIB	1	63	2.7907	0.038	0.347	0.01	0.056	0.902	0.299	0.068	0.044	0.113	0.00570588	0.032	0.662155	0.00642394	0.175277	0.043	0.193	0.034	0.172	0.025	1.451	0.026	0.112	0.73	0.118	0.041	0.066	6.307	0.009	53.19	197.62	94.22	82.33	197.41	39.98	66.45	1.14	0.34	1208.25	21.63	41.3	1227.37	156.27	97.12	172.58	189.67
168	SIB	1	64	2.7907	0.01	0.384	0.009	0.082	0.94	0.2	0.094	0.046	0.116	0.008	0.06	0.662155	0.00642394	0.096	0.058	0.259	0.031	0.248	0.044	1.986	0.001	0.115	0.057	0.007	0.024	0.085	5.911	0.009	51.35	172.41	106.02	52.76	132.96	31.81	72.56	2.01	0.55	1319.33	68.3	59.71	1151.35	173.89	159.06	168.87	179.61
169	SIB	1	54	3.09119	0.019	0.545	0.015	0.084	0.869	0.21	0.096	0.058	0.148	0.01	0.065	0.662155	0.00642394	0.175277	0.07	0.337	0.017	0.189	0.041	3.82	0.002	0.116	0.031	0.013	0.022	0.107	5.795	0.007	119.52	197.44	116.61	41.54	124.02	31.27	87.52	2.81	0.71	1591.32	141.09	89.88	1352.38	152.47	107.04	153.75	266.13
170	SIB	1	71	3.12862	0.004	0.359	0.01	0.065	0.975	0.232	0.087	0.067	0.122	0.007	0.058	0.711	0.006	0.175277	0.048	0.256	0.024	0.208	0.037	2.139	0.002	0.141	0.146	0.038	0.08	0.078	5.88	0.014	84.52	221.69	140.28	61.16	146.86	30.4	95.62	2.29	0.65	1738.65	105.57	65.91	1576.27	231.57	251.03	257.99	251.1
171	SIB	1	52	3.25506	0.059	0.477	0.005	0.062	0.957	0.297	0.096	0.052	0.084	0.007	0.035	0.662155	0.00642394	0.142	0.059	0.221	0.03	0.184	0.034	1.609	0.002	0.098	0.025	0.006	0.01	0.087	5.505	0.009	51.43	239.44	161.28	64.08	150.76	36.93	104.73	2.52	0.69	1904.32	57.7	70.23	1811.01	189.09	183.4	245.36	326.87
172	SIB	2	62	3.4863	0.045	0.34	0.018	0.08	0.923	0.318	0.089	0.033	0.065	0.006	0.038	0.507	0.00642394	0.119	0.053	0.18	0.035	0.267	0.05	1.606	0.008	0.079	0.154	0.061	0.019	0.069	5.192	0.033	88.92	245.02	154.18	66.59	158.38	36.17	112.09	2.32	0.71	2038.19	104.37	108.63	1812.19	330.35	298.24	284.6	252.69
173	SIB	2	59	3.49576	0.014	0.438	0.039	0.084	1.019	0.358	0.074	0.044	0.095	0.006	0.031	0.662155	0.011	0.175277	0.048	0.218	0.02	0.155	0.039	3.312	0.002	0.145	0.106506	0.013	0.02	0.134	6.114	0.014	137.18	299.67	167.76	81.67	204.27	48.05	116.62	2.05	0.57	2120.49	181.56	116.94	1820.6	373.57	268.57	312.2	309.48
174	SIB	1	66	3.49685	0.02	0.358	0.002	0.098	1.051	0.263	0.074	0.063	0.119	0.007	0.051	0.662155	0.009	0.272	0.051	0.244	0.046	0.229	0.03	1.137	0.003	0.151	0.239	0.039	0.044	0.062	5.714	0.014	96.34	197.43	108.95	60.26	149.6	34.61	79.67	1.81	0.53	1448.6	133.61	66.84	1224.91	160.11	138.4	142.84	167.29
175	SIB	1	53	3.73796	0.006	0.583	0.011	0.135	0.908	0.283	0.084	0.045	0.095	0.008	0.063	0.662155	0.006	0.175277	0.063	0.257	0.012	0.191	0.045	2.622	0.005	0.176	0.106506	0.006	0.031	0.126	4.29	0.013	121.31	273.46	176.08	58.45	154.91	37.73	122.06	3.01	0.79	2219.36	165.55	100.37	1921.78	226.34	205.11	255.78	341.07
176	SIB	2	63	3.87597	0.016	0.334	0.016	0.076	0.88	0.356	0.083	0.043	0.073	0.008	0.071	0.662155	0.007	0.132	0.053	0.191	0.023	0.225	0.04	1.485	0.003	0.091	0.06	0.025	0.032	0.044	5.161	0.012	99.63	262.73	138.73	89.39	206.92	42.87	101.17	1.55	0.49	1839.54	120.07	111.43	1632.5	332.57	235.72	226.42	183.86
177	SIB	2	73	4.07956	0.019	0.296	0.016	0.084	0.994	0.282	0.078	0.047	0.078	0.007	0.032	0.662155	0.006	0.175277	0.052	0.182	0.027	0.219	0.021	1.686	0.002	0.069	0.069	0.016	0.021	0.066	5.116	0.013	123.29	239.23	120.64	84.97	201.51	42.1	92.35	1.42	0.46	1679.14	135.5	88.13	1454.38	295.15	184.92	204.12	194.54
178	SIB	1	44	4.13611	0	0.455	0.007	0.085	0.88	0.195	0.084	0.059	0.121	0.007	0.073	0.662155	0.00642394	0.175277	0.089	0.343	0.023	0.185	0.035	1.085	0.004	0.11	0.102	0.048	0.017	0.087	5.487	0.008	240.89	223.93	111.26	39.56	129.63	34.56	112.6	2.81	0.87	2047.44	278.6	165.73	1583.97	188.59	70	92.12	227.44
179	SIB	1	66	4.39159	0.009	0.507	0.015	0.101	1.038	0.255	0.141	0.08	0.162	0.006	0.074	0.755	0.006	0.175277	0.086	0.305	0.034	0.161	0.041	2.854	0.004	0.084	0.037	0.004	0.015	0.081	5.88	0.011	116.18	188.33	114.85	43.03	122.37	31.74	81.43	2.67	0.67	1480.61	123.93	73.1	1301.79	190.12	189.77	199.9	223.37
180	SIB	2	74	4.4273	0.022	0.621	0.015	0.068	1.04	0.327	0.083	0.047	0.121	0.006	0.043	0.662155	0.00642394	0.175277	0.073	0.253	0.014	0.216	0.036	1.565	0.002	0.112	0.106506	0.005	0.013	0.08	6.764	0.008	135.14	207.2	98.6	63.45	174.96	39.61	81.41	1.55	0.47	1480.24	161.47	88.05	1197.02	191.11	51.74	111.08	215.07
181	SIB	2	59	4.5256	0.007	0.549	0.035	0.083	0.855	0.387	0.083	0.062	0.168	0.008	0.039	0.684	0.006	0.175277	0.053	0.325	0.022	0.189	0.037	1.544	0.002	0.114	0.106506	0.004	0.014	0.112	10.823	0.014	175.99	253.56	131.74	67	182.71	45.42	110.18	1.97	0.6	2003.35	220.34	144.96	1573.88	288.99	132.81	147.53	251.84
182	SIB	2	48	4.66515	0.019	0.346	0.024	0.057	0.874	0.293	0.08	0.036	0.103	0.008	0.053	0.821	0.002	0.167	0.073	0.328	0.029	0.173	0.034	1.446	0.00471947	0.096	0.052	0.021	0.022	0.061	5.784	0.009	62.4	242.41	147.54	76.35	182.65	41.4	102.61	1.93	0.56	1865.81	50.6	95.77	1810.67	321.17	272.97	269.87	240.88
183	SIB	2	78	4.98216	0.014	0.623	0.026	0.071	0.892	0.265	0.082	0.106	0.173	0.006	0.054	0.848	0.00642394	0.175277	0.085	0.369	0.022	0.258	0.032	2.207	0.001	0.127	0.085	0.0235242	0.022	0.129	9.533	0.011	250.7	197.22	82.63	47.88	151.51	38.95	81.03	1.73	0.53	1473.42	259.25	138.48	1036	172.66	104.6	111.39	150.72
184	SIB	1	70	5.42987	0.016	0.339	0.013	0.111	0.781	0.219	0.074	0.044	0.079	0.006	0.042	0.662155	0.006	0.175277	0.067	0.228	0.051	0.176	0.026	1.308	0.009	0.071	0.193	0.064	0.055	0.083	6.202	0.009	95.58	217.03	123.8	64.67	164.36	37.33	88.92	1.91	0.54	1616.73	113.08	82.19	1425.56	234.03	179.77	223.63	257.8
185	SIB	1	74	5.42987	0.034	0.528	0.008	0.089	0.772	0.235	0.074	0.057	0.087	0.006	0.075	0.781	0.005	0.175277	0.083	0.229	0.023	0.216	0.032	1.677	0.001	0.101	0.115	0.029	0.01	0.109	5.891	0.019	166.63	189.74	98.75	56.96	152.19	38.07	85.63	1.73	0.56	1556.92	185.22	92.86	1260.16	152.44	38.84	128.34	214.4
186	SIB	2	76	5.61967	0.036	0.493	0.005	0.115	0.895	0.311	0.09	0.091	0.088	0.007	0.053	0.662155	0.00642394	0.175277	0.055	0.219	0.02	0.282	0.036	2.341	0.002	0.112	0.106506	0.005	0.006	0.088	4.788	0.033	118.14	259.44	138.45	82.35	214.22	48.71	99.67	1.68	0.47	1812.32	121.56	127.8	1577.18	292.98	144.53	242	317.42
187	SIB	2	63	5.88088	0.023	0.351	0.036	0.073	0.823	0.303	0.076	0.032	0.08	0.005	0.041	0.662155	0.003	0.204	0.059	0.225	0.029	0.224	0.026	1.276	0.001	0.118	0.072	0.055	0.023	0.065	5.088	0.012	93.9	248.26	130.61	83.92	197.16	36.5	99.37	1.56	0.5	1806.74	108.6	92.89	1513.81	332.77	185.03	191.42	199.35
188	SIB	1	56	6.07136	0.025	0.507	0.043	0.157	0.902	0.242	0.077	0.149	0.204	0.012	0.076	0.662155	0.01	0.389	0.104	0.437	0.019	0.144	0.038	1.785	0.001	0.136	0.032	0.009	0.037	0.107	6.294	0.01	185.37	202.24	90.17	47.44	140.82	30.86	93.18	1.9	0.66	1694.31	224.59	113.15	1251.33	142.14	37.58	12.12	140
189	SIB	2	70	6.23131	0.02	0.6	0.045	0.098	0.808	0.287	0.111	0.049	0.097	0.007	0.083	0.707	0.00642394	0.175277	0.088	0.282	0.029	0.219	0.032	2.27	0.003	0.103	0.106506	0.008	0.007	0.105	8.566	0.011	117.44	228.8	132.38	65.99	169.77	40.82	96.23	2.01	0.57	1749.78	125.45	105.88	1520.66	248.13	180.62	224.14	297.78
190	SIB	2	59	6.29724	0.003	0.363	0.028	0.056	0.792	0.311	0.06	0.042	0.057	0.005	0.039	0.662155	0.004	0.175277	0.081	0.191	0.029	0.2	0.03	1.611	0.001	0.107	0.029	0.017	0.008	0.095	5.789	0.008	173.48	253.95	148.1	52.76	145.05	36.85	111.05	2.81	0.77	2019.19	193.55	118.86	1674.12	251.81	207.15	237.61	248.78
191	SIB	1	74	6.52537	0.012	0.541	0.015	0.065	1.027	0.253	0.084	0.048	0.095	0.006	0.049	0.662155	0.017	0.175277	0.067	0.26	0.06	0.184	0.042	3.184	0.001	0.165	0.132	0.043	0.059	0.15	5.791	0.018	174.72	244.67	142.35	39.57	131.72	26.06	120.35	3.6	0.91	2188.3	229.74	88.44	1819.04	223.16	95.64	211.08	336.29
192	SIB	2	61	6.70075	0.033	0.444	0.025	0.063	0.903	0.278	0.08	0.036	0.095	0.006	0.04	0.662155	0.005	0.208	0.072	0.256	0.026	0.236	0.031	2.042	0.002	0.127	0.08	0.02	0.016	0.086	6.348	0.015	91.69	204.26	96.44	76.88	188.31	43.4	73.9	1.25	0.39	1343.71	119.16	68.07	1089.48	197.57	79.82	93.51	115.41
193	SIB	2	59	6.71475	0.03	0.508	0.027	0.052	0.875	0.212	0.086	0.063	0.14	0.007	0.062	0.584	0.003	0.133	0.082	0.333	0.02	0.267	0.03	1.963	0.001	0.127	0.106506	0.002	0.012	0.082	5.922	0.013	65.42	213.33	122.93	64.04	164.69	35.77	85.57	1.92	0.52	1555.89	66.65	70.82	1386.88	254.37	185.84	207.69	229.31
194	SIB	2	65	6.85055	0.029	0.311	0.056	0.047	0.891	0.2	0.08	0.055	0.107	0.007	0.046	0.728	0.00642394	0.129	0.049	0.272	0.066	0.184	0.028	1.435	0.006	0.1	0.21	0.104	0.063	0.065	5.217	0.012	60.1	244.23	146.38	80.48	185.76	41.76	96.63	1.82	0.52	1756.95	71.91	88.95	1562.28	281.69	231.08	235.84	239.21
195	SIB	2	62	7.74954	0.016	0.451	0.051	0.078	0.954	0.3	0.086	0.051	0.119	0.007	0.039	0.607	0.00642394	0.195	0.066	0.28	0.064	0.217	0.038	1.411	0.003	0.118	0.052	0.025	0.024	0.091	5.5	0.01	100.24	247.53	135.73	75.96	182.92	39.62	98.58	1.79	0.54	1792.39	127.35	111.64	1467.04	301.8	186.73	178.63	213.28
196	SIB	2	66	8.55616	0.004	0.399	0.015	0.088	0.913	0.218	0.082	0.049	0.09	0.005	0.068	0.383	0.006	0.175277	0.075	0.253	0.028	0.177	0.021	1.275	0.003	0.099	0.106506	0.0235242	0.018	0.078	5.525	0.008	153.28	240.73	131.88	64.02	170.36	38.6	100.11	2.06	0.59	1820.32	183.42	98.02	1495.89	254.85	153.62	192.41	260.07
197	SIB	1	68	9.03169	0.025	0.515	0.019	0.149	0.726	0.264	0.091	0.052	0.137	0.007	0.037	0.346	0.00642394	0.175277	0.046	0.238	0.012	0.298	0.024	1.915	0.001	0.128	0.144	0.0235242	0.0308667	0.091	14.337	0.023	334.72	215.83	89.52	58.55	173.72	45.62	95.57	1.53	0.55	1737.63	347.35	141.24	1213.47	94.62	0	32.51	189.06
198	SIB	1	70	9.06455	0.022	0.388	0.006	0.081	1.059	0.307	0.1	0.061	0.14	0.009	0.068	0.662155	0.005	0.23	0.069	0.238	0.047	0.172	0.028	1.882	0.002	0.11	0.096	0.028	0.04	0.044	4.939	0.007	123.29	229.83	103.04	86.49	209.52	38.21	88.74	1.19	0.42	1613.49	166.28	114.37	1249.58	343	204.73	156.15	126.5
199	SIB	2	84	9.61077	0.013	0.554	0.045	0.067	0.895	0.276	0.067	0.085	0.118	0.008	0.058	0.662155	0.007	0.175277	0.111	0.232	0.023	0.233	0.046	2.05	0.002	0.146	0.106506	0.002	0.016	0.102	6.416	0.013	204.45	184.61	69.19	64.62	181.59	34.76	76.16	1.07	0.42	1384.88	218.51	112.02	1012.13	200.65	98.34	51.89	53.8
200	CENT	2	107.397	1.43571	0.024	0.427	0.022	0.091	0.908	0.313	0.07	0.05	0.081	0.01	0.088	0.662155	0.005	0.23	0.085	0.223	0.034	0.194	0.025	2.182	0.005	0.031	0.117	0.0235242	0.043	0.07	5.012	0.011	89.01	202.48	111.44	62.22	153.46	23.94	88.35	1.79	0.58	1606.43	123.13	62.84	1381.42	261.04	182.32	198.52	162.5
201	CENT	1	105.825	1.43571	0.019	0.249	0.141	0.059	0.754	0.493	0.051	0.051	0.051	0.005	0.065	0.623	0.001	0.18	0.045	0.164	0.013	0.247	0.04	2.67	0.011	0.011	0.334	0.186	0.0308667	0.047	4.906	0.022	113.72	148.82	91.92	36.51	85.61	18.8	106.98	2.52	1.25	1945.11	200.61	161.94	1710.27	313.02	222.98	165.44	131.35
202	CENT	2	110.016	1.43571	0.031	0.686	0.022	0.128	0.905	0.647	0.077	0.068	0.106	0.011	0.063	0.662155	0.002	0.253	0.058	0.247	0.011	0.236	0.02	3.166	0.017	0.02	0.058	0.008	0.037	0.066	4.201	0.032	137.73	220.9	138.57	48.52	142.21	34.49	117.87	2.86	0.83	2143.15	218.26	140.01	1827.33	238.07	162.95	215.88	305.34
203	CENT	2	109.134	1.43571	0.021	0.253	0	0.105	0.372	0.266	0.05	0.035	0.047	0.005	0.056	0.662155	0.00642394	0.095	0.053	0.142	0.021	0.084	0.014	2.545	0.006	0.022	0.067	0.01	0.026	0.061	3.958	0.007	71.98	133.27	54.29	56.99	131.49	17.39	63.53	0.95	0.48	1155.19	106.28	34.03	961.17	277.12	172	113.21	0
204	CENT	2	106.729	1.43571	0.01	0.529	0.178	0.16	0.854	0.382	0.099	0.076	0.102	0.00570588	0.104	0.662155	0.00642394	0.175277	0.077	0.283	0.027	0.17606	0.043	5.536	0.004	0.0915526	0.676	0.151	0.144	0.126	6.191	0.023	264.44	211.64	112.01	43.01	96.23	35.21	155.57	2.6	1.62	2828.6	571.06	461.6	2051.11	592.13	354.07	249.27	289.33
205	CENT	2	107.288	1.43571	0.012	0.632	0.016	0.086	0.796	0.294	0.07	0.048	0.089	0.006	0.073	0.662155	0.00642394	0.175277	0.051	0.19	0.034	0.233	0.026	4.12	0.001	0.0915526	0.032	0.0235242	0.024	0.097	3.994	0.024	180.88	322.43	201.02	50.95	153.12	32.82	180.19	3.95	1.18	3276.42	297.53	229.58	2743.28	466.45	189.91	268.87	421.12
206	CENT	2	107.526	1.43571	0.03	0.337	0.044	0.16	0.889	0.311	0.073	0.044	0.067	0.009	0.065	0.662155	0.00642394	0.175277	0.054	0.223	0.039	0.272	0.024	3.174	0.001	0.0915526	0.139	0.045	0.051	0.093	9.043	0.031	109.5	127.53	52.1	40.3	125.88	26.92	62.14	1.29	0.49	1129.82	169.02	79.81	796.67	178.41	34.76	66.73	117.5
207	CENT	2	106.367	1.43571	0.012	0.555	0.051	0.047	0.838	0.333	0.105	0.044	0.116	0.00570588	0.083	0.662155	0.00642394	0.317	0.074	0.221	0.016	0.209	0.023	4.842	0.002	0.042	0.039	0.009	0.025	0.154	3.982	0.02	107.62	266.7	165.92	63.69	157.08	37.91	142.01	2.61	0.9	2582.15	171.91	163.94	2194.18	375.58	224.98	205.55	253.54
208	CENT	2	107.595	1.43571	0.003	0.531	0.144	0.144	1.067	0.434	0.064	0.045	0.06	0.013	0.075	0.698	0.002	0.265	0.056	0.125	0.014	0.325	0.019	4.418	0.013	0.02	0.117	0.013	0.042	0.109	5.296	0.015	127.96	186.88	110.75	37.25	103.47	24.86	112.35	2.97	1.09	2042.89	210.73	133.46	1695.73	279.5	173.08	165.99	182.16
209	CENT	1	106.351	1.43571	0.079	0.387	0.011	0.093	0.966	0.345	0.096	0.035	0.092	0.006	0.059	0.662155	0.003	0.094	0.052	0.227	0.035	0.266	0.025	2.399	0.012	0.034	0.22	0.021	0.061	0.092	5.117	0.036	59.9	140.4	74.2	53.8	140.39	26.03	65.21	1.38	0.46	1185.68	85.95	52.49	1040.63	203.24	163.26	140.32	104.46
210	CENT	2	107.115	1.43571	0.019	0.68	0.005	0.069	1.267	0.471	0.093	0.069	0.098	0.013	0.075	1.164	0.005	0.245	0.068	0.242	0.017	0.304	0.02	2.55	0.006	0.015	0.112	0.0235242	0.04	0.044	4.855	0.01	102.75	140.79	56.91	49.68	141.02	26.51	63.6	1.15	0.45	1156.5	161.81	79.02	885.76	216.55	99.68	74.53	41.59
211	CENT	2	108.745	1.43571	0.029	0.352	0.014	0.075	0.86	0.225	0.081	0.056	0.092	0.009	0.077	0.667	0.003	0.155	0.048	0.238	0.053	0.226	0.019	2.73	0.009	0.028	0.095	0.028	0.033	0.072	5.447	0.021	70.9	175.16	88.59	60.59	154.06	26.79	74.58	1.46	0.48	1356.13	87.41	57.3	1212.41	256.94	164.37	153.67	89.3
212	CENT	2	107.559	1.43571	0.042	0.24	0.164	0.17	0.733	0.262	0.053	0.057	0.076	0.012	0.057	0.662155	0.00642394	0.12	0.048	0.313	0.021	0.185	0.022	1.876	0.006	0.026	0.082	0.016	0.036	0.043	4.927	0.023	65.23	225.95	136.77	66.73	161.85	31	106.12	2.05	0.66	1929.5	82.53	82.39	1788.52	336.65	262.25	253.05	168.9
213	CENT	2	106.274	1.43571	0.024	0.634	0.001	0.152	0.862	0.29	0.08	0.057	0.135	0.012	0.08	0.662155	0.006	0.285	0.066	0.265	0.52	0.225	0.025	3.662	0.001	0.021	0.128	0.004	0.025	0.078	6.248	0.039	145.91	301.35	199.21	54.94	154.14	36.38	157.8	3.63	1.02	2869.21	234.8	156.57	2448.7	286.38	204.26	266.78	386.91
214	CENT	2	110.614	1.43571	0.224	0.471	0.111	0.125	0.911	0.406	0.081	0.058	0.072	0.008	0.081	0.662155	0.001	0.175277	0.048	0.145	0.009	0.321	0.02	3.476	0.003	0.026	0.043	0.0235242	0.018	0.137	5.157	0.016	90.53	133.82	63.61	39.21	127.04	30.23	61.3	1.62	0.48	1114.6	124.77	74.55	830.71	163.17	72.64	102.32	150.59
215	CENT	1	106.033	1.43571	0.065	0.459	0.04	0.089	0.942	0.324	0.088	0.041	0.087	0.014	0.062	0.65	0.00642394	0.162	0.081	0.253	0.011	0.253	0.02	2.847	0.001	0.032	0.131	0.019	0.023	0.033	6.271	0.012	54.52	225.84	125.74	86.49	189.71	34.4	86.83	1.45	0.46	1578.74	48.02	51.81	1511.79	200.05	182.24	196.14	148.63
216	CENT	2	109.181	1.43571	0.013	0.611	0.043	0.123	0.844	0.289	0.085	0.058	0.097	0.009	0.089	0.656	0.00642394	0.175277	0.067	0.255	0.019	0.185	0.016	3.425	0.011	0.022	0.046	0.002	0.016	0.103	4.446	0.016	174.88	343.01	213.7	64.3	168.59	39.32	171.11	3.32	1.01	3111.2	271	183.31	2568.05	382.84	210.51	244.42	374.74
217	CENT	2	112.288	1.43571	0.023	0.398	0.015	0.161	0.641	0.426	0.068	0.065	0.089	0.009	0.131	0.662155	0.00642394	0.179	0.057	0.203	0.035	0.276	0.028	5.155	0.022	0.021	0.721	0.111	0.221	0.144	5.515	0.027	127.31	241.32	138.93	51.55	119.38	24.31	135.2	2.7	1.13	2458.22	218.44	235.17	2041.71	554.83	237.39	275.64	280.56
218	CENT	1	101.468	1.43571	0.027	0.352	0.003	0.141	0.803	0.298	0.092	0.076	0.154	0.012	0.086	0.474	0.00642394	0.175277	0.042	0.3	0.03	0.232	0.022	3.516	0.017	0.019	0.572	0.125	0.09	0.057	5.012	0.028	63.26	122.91	53.65	43.76	121.1	27.73	51.68	1.23	0.43	939.7	97.33	75.08	639.73	204.28	137.17	95.9	39.71
219	CENT	2	103.425	1.43571	0.054	0.558	0.008	0.12	0.877	0.287	0.06	0.038	0.085	0.008	0.081	0.738	0.005	0.188	0.05	0.199	0.011	0.29	0.022	3.358	0.005	0.02	0.017	0.007	0.019	0.073	4.456	0.015	105.37	163.24	68.86	47.97	128.39	25.96	74.63	1.44	0.58	1356.98	173.08	109.97	1019.82	309.91	114.2	95.57	63.56
220	CENT	2	106.014	1.43571	0.036	0.334	0.115	0.058	0.886	0.39	0.065	0.036	0.047	0.01	0.089	0.662155	0.00642394	0.144	0.043	0.156	0.032	0.167	0.028	2.683	0.00471947	0.019	0.067	0.007	0.017	0.042	5.306	0.028	111.15	256.16	151.88	69.9	169.84	28.59	126.25	2.17	0.74	2295.55	129.54	132.43	2113.58	435.49	310.56	307.88	214.49
221	CENT	1	102.458	1.43571	0.043	0.456	0.007	0.224	1.003	0.369	0.084	0.049	0.085	0.009	0.065	0.662155	0.00642394	0.199	0.056	0.243	0.007	0.241	0.023	3.07	0.004	0.024	0.03	0.005	0.037	0.048	4.415	0.042	93.48	221.92	133.34	52.38	147.25	29.01	104.9	2.55	0.71	1907.33	136.12	138.01	1645.24	349.26	207.38	253.56	274.63
222	CENT	2	104.592	1.43571	0.037	0.394	0.002	0.114	0.849	0.342	0.054	0.045	0.065	0.006	0.077	0.483	0.004	0.175277	0.059	0.171	0.02	0.261	0.015	2.723	0.002	0.016	0.198	0.015	0.025	0.077	5.032	0.024	113.09	183.81	88.44	65.71	168.37	29.97	79.22	1.35	0.47	1440.35	151.46	82.81	1198.04	225.85	158.38	152.91	90.39
223	CENT	2	102.384	1.43571	0.007	0.547	0.015	0.083	0.992	0.295	0.08	0.039	0.09	0.008	0.072	0.662155	0.01	0.175277	0.065	0.264	0.018	0.158	0.028	2.904	0.00471947	0.0915526	0.106506	0.011	0.017	0.059	5.289	0.041	149.59	219.01	120.48	49.09	141.78	25.84	121.22	2.45	0.85	2204.16	233.63	177.06	1825.65	363.52	223.53	164.66	145.45
224	CENT	2	101.099	1.43571	0.044	0.371	0.025	0.107	0.879	0.281	0.064	0.046	0.078	0.006	0.103	0.662155	0.00642394	0.099	0.062	0.224	0.011	0.25	0.035	3.222	0.00471947	0.026	0.173	0.032	0.053	0.056	4.763	0.016	66.39	235.7	134.32	83.47	181.73	37.63	96.01	1.61	0.53	1745.69	50.29	68.3	1673.19	241.93	203.85	204.63	136.37
225	CENT	2	104.263	1.43571	0.035	0.475	0.014	0.073	1.101	0.319	0.088	0.044	0.07	0.016	0.068	0.662155	0.008	0.175277	0.068	0.269	0.066	0.238	0.017	1.933	0.001	0.027	0.106506	0.021	0.033	0.052	5.453	0.021	137.69	259.62	124.05	88.61	210.46	33.36	101.21	1.4	0.48	1840.23	161.75	91.93	1549.68	393.17	221.02	210.11	105.14
226	HS	2	66.5699	1.43571	0.001	0.569	0.022	0.075	0.788	0.298	0.083	0.06	0.126	0.007	0.091	0.662155	0.008	0.175277	0.061	0.266	0.018	0.2	0.022	3.472	0.001	0.0915526	0.106506	0.004	0.077	0.102	5.004	0.01	201.36	287.9	138.32	65.05	183.02	47.08	128.72	2.13	0.7	2340.41	309.81	204.21	1760.42	314.11	60.77	92.07	283.6
227	HS	2	65.9014	1.43571	0.009	0.495	0.029	0.052	0.78	0.331	0.073	0.073	0.134	0.006	0.053	0.662155	0.002	0.325	0.066	0.283	0.034	0.128	0.013	2.812	0.001	0.0915526	0.106506	0.003	0.027	0.06	5.138	0.024	136.78	219.61	118.75	59.07	159.99	37.04	102.74	2.01	0.64	1868.13	213.8	139.7	1506.16	205.14	135.42	89.83	175.49
228	HS	2	82.5151	1.43571	0.004	0.424	0.002	0.079	0.756	0.275	0.067	0.042	0.099	0.007	0.073	0.662155	0.00642394	0.175277	0.059	0.21	0.064	0.152	0.02	2.559	0.004	0.026	0.168	0.078	0.038	0.078	5.398	0.018	115.36	334.72	228.19	67.63	175.39	39.07	156.07	3.37	0.89	2837.79	138.23	121.05	2537.44	300.94	257.02	372.88	481.99
229	HS	2	65.5945	1.43571	0.006	0.392	0.025	0.073	0.908	0.28	0.092	0.032	0.064	0.007	0.068	0.662155	0.004	0.102	0.041	0.209	0.055	0.216	0.021	2.466	0.00471947	0.0915526	0.109	0.018	0.035	0.046	5.713	0.022	76.48	232.78	131.58	71.66	164.3	35.1	90.47	1.84	0.55	1644.96	100.71	102.06	1446.76	313.14	236.6	234.62	187.5
230	HS	2	74.4	1.43571	0.004	0.663	0.01	0.046	0.882	0.351	0.12	0.047	0.156	0.008	0.058	0.813	0.00642394	0.175277	0.073	0.238	0.03	0.199	0.017	3.601	0.001	0.0915526	0.069	0.008	0.041	0.083	4.85	0.009	122.83	217.58	117.01	68.76	167.55	39.95	96.83	1.7	0.58	1760.71	196.1	94.29	1419.45	161.75	136.58	88.31	114.93
231	HS	2	75.3342	1.43571	0.047	0.467	0	0.13	0.823	0.264	0.077	0.04	0.084	0.008	0.105	0.662155	0.009	0.175277	0.063	0.257	0.065	0.253	0.022	2.881	0.002	0.019	0.054	0.017	0.045	0.073	6.97	0.014	186.08	283.88	155.46	70.62	190.41	40.03	124.86	2.2	0.66	2270.37	259.06	166.98	1828.71	390.19	249.53	285.35	296.16
232	HS	1	65.3342	1.43571	0.008	0.578	0.011	0.072	0.876	0.327	0.093	0.067	0.106	0.007	0.061	0.662155	0.009	0.175277	0.044	0.295	0.042	0.151	0.017	3.383	0.00471947	0.0915526	0.026	0.007	0.026	0.094	5.412	0.024	127.21	212.47	130.6	42.97	132.98	33.93	103.61	3.04	0.78	1883.94	158.49	80.32	1628.83	175.35	92.57	155.91	272.57
233	HS	2	72.0384	1.43571	0.011	0.465	0.054	0.096	0.972	0.275	0.115	0.055	0.136	0.009	0.072	0.662155	0.00642394	0.175277	0.061	0.347	0.027	0.196	0.017	2.061	0.00471947	0.0915526	0.045	0.0235242	0.021	0.027	5.123	0.008	153.5	253.42	143.53	47.66	143.59	33.8	112.06	3.01	0.78	2037.56	211.18	136.99	1611.62	314.13	159.8	187.57	270.75
234	HS	2	78.5973	1.43571	0.005	0.544	0.039	0.089	0.813	0.598	0.064	0.023	0.11	0.007	0.055	0.662155	0.013	0.189	0.06	0.232	0.023	0.17	0.015	2.975	0.001	0.0915526	0.059	0.007	0.035	0.052	4.943	0.019	104.49	271.71	173.97	65.99	167.73	39.38	133.82	2.64	0.8	2433.17	161.91	114.09	2095.27	257.95	166.35	226.16	335.72
235	HS	2	57.4493	1.43571	0.003	0.384	0.01	0.088	0.776	0.292	0.1	0.028	0.137	0.006	0.052	0.662155	0.005	0.192	0.063	0.295	0.035	0.148	0.014	2.632	0.002	0.0915526	0.153	0.039	0.058	0.049	6.027	0.004	82.91	247.68	153.61	71.02	178.6	41.45	106.38	2.16	0.6	1934.25	107.71	77.05	1701.6	202.62	163.88	240.29	322.32
236	HS	1	80.1315	1.43571	0.151	0.333	0.004	0.078	0.894	0.264	0.084	0.049	0.117	0.007	0.053	0.662155	0.007	0.175277	0.042	0.241	0.07	0.189	0.017	2.55	0.001	0.0915526	0.123	0.05	0.063	0.071	4.941	0.007	88.54	200.89	120.9	51.14	141.97	33.43	93.74	2.36	0.66	1704.45	118.63	93.5	1478.6	207.76	127.07	179.56	268.74
237	HS	1	70.8767	1.43571	0.075	0.548	0.01	0.126	0.815	0.274	0.064	0.075	0.137	0.007	0.06	0.662155	0.00642394	0.128	0.05	0.307	0.035	0.246	0.028	3.522	0.00471947	0.0915526	0.114	0.0235242	0.036	0.086	11.12	0.021	69.22	140.32	81.74	42.88	124.17	26.88	75.65	1.91	0.61	1375.54	105.2	85.13	1142.97	148.09	89.75	75.17	156.22
238	HS	2	69.4685	1.43571	0.043	0.473	0.012	0.072	0.943	0.346	0.087	0.036	0.124	0.006	0.067	0.715	0.003	0.142	0.053	0.286	0.03	0.196	0.028	4.47	0.002	0.0915526	0.022	0.004	0.015	0.13	4.753	0.007	73.05	208.83	106.37	80.97	184.93	40.31	76.22	1.31	0.41	1385.92	78.78	60.53	1235.96	249.9	188.89	156.43	118.11
239	HS	1	67.7425	1.43571	0.008	0.621	0	0.106	1.028	0.32	0.106	0.082	0.21	0.008	0.077	0.662155	0.003	0.175277	0.096	0.287	0.01	0.209	0.023	4.041	0.001	0.0915526	0.106506	0.007	0.015	0.065	5.004	0.007	104.73	249.97	152.45	67.52	171.73	41.58	107.86	2.26	0.63	1961.24	128.14	120.5	1672.51	215.13	161.48	224	360.28
240	HS	2	64.0164	1.43571	0.029	0.605	0.021	0.063	0.919	0.338	0.099	0.041	0.086	0.009	0.06	1.177	0.006	0.27	0.059	0.239	0.029	0.167	0.023	2.902	0.003	0.016	0.106506	0.005	0.018	0.126	5.924	0.018	126.83	192.99	100.39	59.71	154.89	34.97	79.43	1.68	0.51	1444.27	176.43	72.64	1166.12	198.88	151.57	152.03	158.47
241	HS	2	71.7425	1.43571	0.06	0.524	0.038	0.072	0.917	0.294	0.08	0.073	0.102	0.008	0.093	0.662155	0.004	0.175277	0.064	0.256	0.007	0.205	0.024	2.83	0.003	0.04	0.067	0.013	0.016	0.067	4.787	0.011	148.48	183.69	72.35	70.56	178.05	39.48	73.34	1.03	0.41	1333.59	207.09	147.43	933.1	261.03	94.62	60.91	109.37
242	HS	1	69.6438	1.43571	0.015	0.428	0.014	0.109	0.74	0.301	0.076	0.058	0.113	0.005	0.064	0.662155	0.004	0.175277	0.056	0.341	0.114	0.132	0.035	3.004	0.00471947	0.0915526	0.106506	0.013	0.041	0.077	5.227	0.023	104.25	222.95	139.95	47.95	136.23	32.69	105.96	2.92	0.78	1926.64	158.9	95.28	1657.75	170.8	138.27	188.64	302.53
243	HS	1	72.7315	1.43571	0.03	0.491	0.006	0.099	0.882	0.302	0.068	0.071	0.144	0.008	0.063	0.662155	0.002	0.123	0.051	0.254	0.04	0.169	0.025	3.114	0.00471947	0.0915526	0.106506	0.01	0.02	0.105	5.92	0.017	101.79	226.8	122.72	73.06	181.03	39.35	101.4	1.68	0.56	1843.77	127.98	138.09	1552.06	385.13	240.86	225.54	215.39
244	HS	2	54.0959	1.43571	0.015	0.34	0.011	0.067	0.775	0.307	0.081	0.039	0.098	0.005	0.049	0.662155	0.00642394	0.127	0.052	0.202	0.034	0.165	0.026	2.82	0.00471947	0.0915526	0.116	0.024	0.024	0.062	4.907	0.006	55.49	230.85	155.29	63.47	152.54	34.91	105.24	2.45	0.69	1913.5	60.49	78.35	1771.27	268.85	271.08	281.35	280.53
245	CENTOS	1	74	1.43571	0.019	0.512	0.008	0.075	0.729	0.32	0.081	0.043	0.114	0.007	0.048	0.662155	0.006	0.175277	0.059	0.269	0.026	0.157	0.021	3.328	0.002	0.0915526	0.106506	0.011	0.041	0.085	4.995	0.282	119.49	225.87	119.91	62.74	168.13	41.84	96	1.91	0.57	1745.59	181.68	110.86	1465.48	215.49	52.06	156.43	281.77
246	CENT	2	105	1.43571	0.008	0.456	0.005	0.083	1.009	0.318	0.059	0.073	0.085	0.007	0.076	0.662155	0.00642394	0.175277	0.073	0.217	0.024	0.317	0.031	2.988	0.005	0.02	0.061	0.0235242	0.098	0.054	4.89	0.027	105.36	191.13	106.57	56.71	141.11	31.08	96.7	1.88	0.69	1758.19	158.34	133.29	1543.29	271.57	182.39	189.92	183.67
247	CENT	1	106	1.43571	0.054	0.705	0.007	0.108	0.895	0.403	0.081	0.054	0.085	0.01	0.078	0.662155	0.01	0.175277	0.057	0.192	0.017	0.17606	0.024	3.207	0.006	0.0915526	0.057	0.004	0.05	0.094	5.34	0.026	179.32	233.43	123.89	51.49	158.61	40.16	111.58	2.41	0.7	2028.75	213.51	84.15	1650.49	230	41.59	138.78	258.25
248	CENT	1	105	1.43571	0.008	0.295	0.042	0.073	0.662	0.461	0.109	0.039	0.093	0.001	0.067	0.662155	0.00642394	0.175277	0.044	0.165	0.046	0.194	0.029	3.233	0.029	0.008	0.535	0.114	0.139	0.133	4.319	0.02	60.08	154.02	95.91	45.09	107.82	21.61	89.36	2.13	0.83	1624.77	84.13	45.53	1467.1	178.76	177.49	105.5	58.83
249	CENT	1	106	1.43571	0.047	0.623	0.026	0.115	0.776	0.53	0.076	0.065	0.104	0.008	0.064	0.582	0.00642394	0.175277	0.06	0.203	0.019	0.204	0.023	3.551	0.001	0.019	0.03	0.0235242	0.018	0.093	4.353	0.015	140.89	134.36	37.85	60.66	160.83	32.64	54.5	0.62	0.34	991.04	228.44	49.95	649.34	171.79	93.72	29.15	0
250	CENT	1	105	1.43571	0.022	0.412	0.048	0.075	0.777	0.331	0.185	0.037	0.093	0.002	0.073	0.662155	0.002	0.175277	0.069	0.224	0.038	0.17606	0.025	3.669	0.001	0.0915526	0.173	0.032	0.065	0.09	4.921	0.007	58.61	232.33	142.38	72.85	160.58	31.48	105.67	1.95	0.66	1921.34	58.66	68.92	1830.8	236.09	198.6	197.27	170.84
251	CENT	1	105	1.43571	0.036	0.463	0.006	0.101	0.855	0.295	0.059	0.046	0.077	0.008	0.056	0.763	0.00642394	0.175277	0.054	0.199	0.017	0.166	0.024	3.302	0.001	0.016	0.091	0.004	0.018	0.096	5.128	0.011	95.01	174.2	91.72	55.39	141.68	26.25	78.73	1.66	0.56	1431.58	146.78	51.17	1226.29	98.79	72.51	100.64	146.36
252	CENT	2	105	1.43571	0.021	0.367	0.008	0.086	0.89	0.293	0.059	0.048	0.05	0.007	0.076	0.618	0.00642394	0.206	0.087	0.165	0.014	0.275	0.021	3.196	0.008	0.03	0.055	0.011	0.025	0.076	4.811	0.013	93.4	167.18	87.38	55.38	128.44	23.02	89.56	1.58	0.7	1628.44	138.51	105.24	1442.94	302.59	197.3	151.5	57.67
253	CENT	2	105	1.43571	0.021	0.32	0.122	0.082	0.549	0.376	0.098	0.041	0.051	0.003	0.067	0.662155	0.00642394	0.175277	0.041	0.152	0.04	0.153	0.018	2.268	0.014	0.018	0.069	0.0235242	0.026	0.052	4.652	0.029	113.93	140.49	61.42	50.41	118.37	25.36	83.13	1.22	0.7	1511.44	218.34	124.12	1205.91	255.86	138.86	69.09	0
254	CENT	2	106	1.43571	0.025	0.473	0.006	0.114	0.796	0.441	0.071	0.053	0.085	0.01	0.066	0.662155	0.002	0.175277	0.061	0.167	0.026	0.239	0.023	2.552	0.001	0.0915526	0.033	0.0235242	0.018	0.089	4.915	0.015	110.61	128.84	73.64	31.7	115.6	29.66	73.9	2.32	0.64	1343.67	190.86	103.06	1017.04	128.49	112.23	93.65	188.11
255	CENT	2	105	1.43571	0.01	0.516	0.037	0.08	0.783	0.309	0.07	0.06	0.092	0.007	0.089	0.662155	0.006	0.175277	0.06	0.278	0.017	0.211	0.017	3.251	0.027	0.0915526	0.092	0.012	0.056	0.084	7.122	0.02	160.25	232.74	139.69	57.23	156.85	31.65	127.43	2.44	0.81	2317.1	266.85	147.75	1873.17	200.27	158.95	122.14	242.05
256	CENT	2	104	1.43571	0.021	0.529	0.003	0.099	1.076	0.419	0.068	0.056	0.075	0.007	0.064	0.609	0.004	0.209	0.051	0.185	0.011	0.239	0.017	3.216	0.003	0.027	0.026	0.0235242	0.029	0.073	5.524	0.032	107.61	209.93	122.98	53.73	140.8	29.41	103.92	2.29	0.74	1889.57	163.01	120.07	1632.01	320.55	221.53	222.61	211.44
257	CENT	2	104	1.43571	0.062	0.648	0.003	0.089	1.003	0.373	0.122	0.059	0.098	0.00570588	0.059	0.785	0.004	0.175277	0.058	0.218	0.0310346	0.143	0.025	3.083	0.00471947	0.022	0.106506	0.006	0.017	0.098	4.528	0.018	84.18	250.08	139.94	83.47	183.99	39.35	102.98	1.68	0.56	1872.45	97.01	88.22	1661.21	361.49	279.75	231.77	145.42
258	CENT	2	101	1.43571	0.044	0.304	0	0.14	0.793	0.307	0.051	0.05	0.066	0.01	0.065	0.431	0.002	0.175277	0.038	0.123	0.025	0.138	0.02	2.505	0.002	0.017	0.117	0.025	0.025	0.063	5.125	0.023	93.42	173.91	66.33	69.24	167.03	33.05	73.63	0.96	0.44	1338.71	133.49	103.11	1061.55	354.15	131.77	136.42	27.73
259	CENT	2	100	1.43571	0.04	0.385	0.017	0.108	0.893	0.316	0.116	0.042	0.081	0.006	0.061	0.662155	0.005	0.175277	0.056	0.21	0.045	0.189	0.026	2.557	0.001	0.029	0.129	0.027	0.05	0.065	4.838	0.023	90.26	232.54	109.65	88.02	198.38	37.79	82.4	1.25	0.42	1498.16	93.61	86.3	1318.13	340.99	227.82	204.59	76.47
260	CENT	1	100	1.43571	0.072	0.444	0.004	0.112	0.988	0.262	0.066	0.056	0.103	0.008	0.055	0.662155	0.006	0.175277	0.063	0.247	0.029	0.187	0.022	2.167	0.001	0.0915526	0.076	0.016	0.024	0.039	5.113	0.012	80.94	152.14	75.74	53.31	143.61	28.36	60.89	1.42	0.42	1107.19	104.49	47.8	928.03	157.12	125.14	117.68	139.25
261	CENT	1	100	1.43571	0.014	0.867	0.02	0.166	0.984	0.335	0.112	0.079	0.146	0.01	0.112	1.059	0.008	0.175277	0.063	0.331	0.009	0.236	0.023	3.814	0.004	0.0915526	0.193	0.0235242	0.063	0.074	4.514	0.02	162.58	191.3	89.72	40.45	111.85	23.11	97.8	2.22	0.87	1778.25	245.31	130.27	1387.1	348.56	135.08	141.31	138.72
262	CENT	1	101	1.43571	0.017	0.481	0.002	0.131	1.002	0.292	0.091	0.052	0.127	0.009	0.061	0.662155	0.005	0.175277	0.07	0.247	0.008	0.232	0.025	3.003	0.002	0.0915526	0.048	0.011	0.02	0.043	4.631	0.017	130.75	239.33	131.27	61.5	167.37	38.71	105.25	2.13	0.63	1913.72	191.31	119.08	1511.47	295.51	158.96	185.34	243.03
263	CENT	1	103	1.43571	0.043	0.398	0.006	0.082	0.873	0.328	0.071	0.043	0.078	0.008	0.078	0.544	0.00642394	0.092	0.071	0.211	0.048	0.177	0.025	2.309	0.004	0.015	0.21	0.039	0.051	0.046	4.501	0.015	74.68	131.51	72.39	39.45	106.8	19.85	68.18	1.83	0.64	1239.64	109.15	42.62	1077.43	197.18	138	133.45	116.02
264	CENT	2	101	1.43571	0.011	0.543	0.014	0.085	0.71	0.3	0.079	0.091	0.09	0.005	0.092	0.595	0.00642394	0.175277	0.064	0.258	0.024	0.195	0.031	3.316	0.00471947	0.0915526	0.036	0.011	0.016	0.166	7.532	0.052	267.88	195.07	97.73	43.65	116.99	26.16	97.65	2.24	0.83	1775.56	292.47	104.85	1410.09	149.88	91.58	70.27	88.18
265	CENT	2	102	1.43571	0.023	0.497	0.007	0.063	1.02	0.603	0.068	0.074	0.101	0.00570588	0.083	0.777	0.00642394	0.175277	0.071	0.224	0.019	0.16	0.017	2.418	0.003	0.0915526	0.106506	0.0235242	0.013	0.068	4.977	0.077	71.68	167.87	96.82	48.74	141.03	33.42	82.27	1.99	0.58	1495.82	102.91	107.7	1291.67	238.74	160.09	155.25	191.06
266	CENT	1	100	1.43571	0.022	0.298	0.009	0.082	0.814	0.288	0.05	0.056	0.05	0.006	0.086	0.662155	0.002	0.106	0.07	0.174	0.016	0.21	0.035	2.645	0.00471947	0.017	0.21	0.045	0.049	0.057	4.932	0.014	116.99	274.07	170.94	73.08	167.63	32.51	138.75	2.34	0.83	2522.88	166.8	156.22	2287.89	379.22	280.75	299.97	285.79
267	CENT	2	100	1.43571	0.031	0.255	0.078	0.033	0.78	0.349	0.048	0.054	0.097	0.00570588	0.083	0.662155	0.005	0.225	0.051	0.218	0.012	0.096	0.033	2.21	0.00471947	0.04	0.057	0.029	0.018	0.057	4.398	0.016	100.97	138.5	60.76	42.49	114.31	23.49	69.5	1.43	0.61	1263.63	170.9	79.5	944.45	262.81	136.65	84.45	53.3
268	CENT	1	100	1.43571	0.031	0.356	0.001	0.248	0.882	0.294	0.131	0.059	0.085	0.033	0.076	0.662155	0.001	0.175277	0.055	0.178	0.021	0.249	0.024	3.13	0.00471947	0.0915526	0.221	0.023	0.031	0.086	4.634	0.033	133.95	178.49	104.21	36.81	91.3	24.81	119.45	2.83	1.31	2171.88	262.46	250.05	1766.51	506.81	260.25	217.53	212.81
269	CENT	1	100	1.43571	0.018	0.459	0.001	0.136	0.872	0.346	0.077	0.052	0.105	0.00570588	0.048	0.652	0.00642394	0.175277	0.04	0.195	0.019	0.168	0.019	1.815	0.00471947	0.0915526	0.098	0.0235242	0.03	0.036	9.73	0.022	87.03	160.09	94.36	41.02	115.09	24.21	80.99	2.3	0.7	1472.61	134.74	76.06	1252.09	196.96	161.03	145.12	165.18
270	CENT	2	104	1.43571	0.041	0.441	0.026	0.168	0.807	0.414	0.066	0.046	0.058	0.007	0.046	0.662155	0.004	0.075	0.048	0.189	0.032	0.188	0.016	2.786	0.00471947	0.029	0.027	0.0235242	0.008	0.07	4.147	0.02	79.08	148.19	71.43	47.23	135.55	24.14	66.55	1.51	0.49	1210.05	112.38	52.48	1044.26	226.69	95.12	152.34	144.78
271	CENT	2	104	1.43571	0.024	0.436	0.034	0.105	0.811	0.355	0.104	0.036	0.056	0.003	0.062	0.234	0.00642394	0.175277	0.045	0.171	0.028	0.145	0.017	2.52	0.003	0.008	0.026	0.006	0.028	0.108	4.21	0.021	92.01	165.01	82.02	43.87	122.26	24.02	71.64	1.87	0.59	1302.6	151.21	69.74	1164.06	237.18	85.74	179.76	189.25
272	CENT	2	104	1.43571	0.017	0.435	0.018	0.126	0.824	0.418	0.097	0.044	0.077	0.00570588	0.05	0.316	0.003	0.175277	0.046	0.214	0.034	0.163	0.009	2.423	0.002	0.008	0.071	0.0235242	0.028	0.063	4.454	0.024	148.58	222.63	110.89	48.74	137.94	31.54	104.98	2.28	0.76	1908.85	235.59	146.8	1535.87	327.14	78.65	169.18	236.76
273	CENT	2	102	1.43571	0.029	0.485	0.03	0.069	0.769	0.376	0.075	0.055	0.118	0.005	0.071	0.662155	0.011	0.175277	0.057	0.25	0.008	0.156	0.014	3.106	0.001	0.026	0.056	0.005	0.022	0.06	4.864	0.014	170.12	268.11	150.94	50.6	143.42	31.78	126.79	2.98	0.88	2305.39	252.65	138.01	1937.25	268.59	75.39	215.12	376.91
274	CENT	2	103	1.43571	0.003	0.625	0.007	0.114	0.835	0.477	0.077	0.045	0.074	0.00570588	0.062	0.662155	0.004	0.175277	0.041	0.184	0.015	0.174	0.017	3.327	0.002	0.0915526	0.106506	0.006	0.01	0.083	3.831	0.013	132.73	199.53	103.32	48.48	135.58	25.89	95.54	2.13	0.7	1737.13	220.74	107.52	1404.4	276.11	114.57	172.26	211.61
275	CENT	2	102	1.43571	0.01	0.304	0.139	0.102	0.486	0.36	0.063	0.07	0.071	0.005	0.103	0.662155	0.00642394	0.175277	0.043	0.172	0.021	0.242	0.025	4.38	0.006	0.012	0.206	0.064	0.066	0.161	6.245	0.049	96.6	140.75	73.59	39.24	90.81	25.43	92.45	1.88	1.02	1681.01	158.93	149.79	1498.96	365.35	145.82	187.08	161.17
276	CENT	1	100	1.43571	0.038	0.378	0.007	0.118	0.64	0.278	0.099	0.057	0.119	0.007	0.07	0.662155	0.004	0.175277	0.038	0.262	0.012	0.18	0.008	2.915	0.003	0.02	0.113	0.0235242	0.039	0.05	4.362	0.021	77.03	163.3	93.86	38.72	121.75	29.26	76.61	2.42	0.63	1392.92	115.25	79.7	1246.15	171.35	54.74	165.42	280.05
277	HS	1	58	1.43571	0.04	0.444	0.003	0.081	0.779	0.256	0.066	0.063	0.152	0.006	0.09	0.662155	0.004	0.175277	0.068	0.328	0.034	0.209	0.017	2.605	0.001	0.0915526	0.062	0.017	0.032	0.0854816	5.013	0.015	38.37	108.19	33.2	69.34	159.76	32.82	26.34	0.48	0.16	479.01	43.32	1.31	294.93	68.98	81.81	0	0
278	HS	1	62	1.43571	0.023	0.3	0.007	0.08	0.835	0.278	0.073	0.039	0.136	0.008	0.057	0.662155	0.00642394	0.183	0.062	0.206	0.023	0.148	0.02	2.473	0.002	0.0915526	0.106506	0.016	0.031	0.049	4.912	0.006	84.64	204.37	109.02	68.37	168.86	38.84	84.45	1.59	0.5	1535.57	118.03	64.51	1318.36	170.49	85.28	111.74	182.15
279	HS	1	77	1.43571	0.044	0.463	0.015	0.063	1.004	0.348	0.092	0.052	0.135	0.006	0.063	0.662155	0.003	0.175277	0.071	0.218	0.032	0.148	0.03	2.904	0.00471947	0.0915526	0.021	0.004	0.027	0.057	5.909	0.017	61.73	180.3	108.07	56.39	142.84	33.98	77	1.92	0.54	1400.01	91.26	65	1222.24	155.63	163.96	137.87	153.24
280	HS	1	61	1.43571	0.113	0.421	0.006	0.06	0.626	0.319	0.074	0.058	0.114	0.01	0.068	0.662155	0.003	0.107	0.054	0.237	0.019	0.148	0.021	2.823	0.001	0.0915526	0.106506	0.019	0.047	0.107	5.185	0.01	66.16	223.28	120.35	91.98	209.39	47.94	90	1.31	0.43	1636.43	62.48	57	1511.34	204.53	164.05	174.64	216.15
281	HS	1	71	1.43571	0.003	0.415	0.015	0.104	0.774	0.212	0.178	0.048	0.098	0.00570588	0.062	0.662155	0.019	0.175277	0.075	0.277	0.021	0.17606	0.035	2.478	0.00471947	0.0915526	0.069	0.014	0.035	0.059	5.17	0.01	306.62	234.48	106.75	48.75	142.69	34.15	108.98	2.19	0.76	1981.47	369.45	141.95	1471.06	222.85	124.54	30.88	44.73
282	HS	1	72	1.43571	0.015	0.43	0.019	0.077	0.869	0.26	0.14	0.058	0.143	0.003	0.081	0.662155	0.002	0.175277	0.081	0.267	0.039	0.099	0.022	2.598	0.001	0.0915526	0.088	0.009	0.027	0.049	5.695	0.011	80.26	202.21	113.63	58.83	153.13	34.37	85.98	1.93	0.56	1563.32	107.53	76.23	1323.55	234.69	157.76	150.56	204.56
283	HS	1	73	1.43571	0.017	0.409	0.004	0.093	0.812	0.286	0.077	0.058	0.107	0.00570588	0.074	0.662155	0.005	0.175277	0.061	0.232	0.019	0.206	0.018	2.591	0.002	0.0915526	0.053	0.0235242	0.052	0.039	4.377	0.022	92.1	211.52	119.08	65.38	167.06	39.71	94.41	1.82	0.57	1716.55	116.82	78.82	1505.82	201.58	118.07	146.21	221.76
284	HS	2	82	1.43571	0.036	0.36	0.065	0.067	0.83	0.289	0.081	0.043	0.104	0.014	0.063	0.662155	0.00642394	0.166	0.052	0.239	0.034	0.194	0.02	2.119	0.002	0.018	0.11	0.06	0.032	0.027	4.566	0.013	72.06	213.2	137.57	54.51	139.06	31.12	106.44	2.52	0.77	1935.38	87.46	99.85	1725.36	302.18	207.34	239.2	283.79
285	HS	1	85	1.43571	0.005	0.586	0.003	0.089	0.728	0.316	0.101	0.056	0.137	0.006	0.051	0.662155	0.007	0.175277	0.06	0.289	0.04	0.223	0.03	2.492	0.001	0.0915526	0.021	0.009	0.018	0.057	3.938	0.019	101.48	170.1	97.45	42.88	128.92	29.65	84.95	2.27	0.66	1544.67	157.55	61.76	1299.77	177.43	142.37	120.23	120.09
286	HS	1	68	1.43571	0.016	0.367	0.007	0.078	0.73	0.272	0.075	0.061	0.149	0.00570588	0.08	0.662155	0.003	0.175277	0.054	0.242	0.026	0.112	0.014	4.478	0.001	0.022	0.149	0.034	0.079	0.102	4.125	0.009	59.73	216.91	128.61	75.31	172.02	40.49	93.75	1.71	0.55	1704.71	63.48	53.03	1603.45	189.9	160.81	193.52	223.35
287	HS	2	59	1.43571	0.024	0.437	0.036	0.062	0.872	0.45	0.071	0.065	0.1	0.00570588	0.058	0.662155	0.004	0.175277	0.052	0.216	0.031	0.17	0.02	2.662	0.001	0.0915526	0.106506	0.019	0.038	0.067	5.171	0.033	126.67	236.8	107.36	86.69	215.16	51.05	92.76	1.24	0.43	1686.63	162.09	143.45	1341.28	355.44	141.17	173.51	207.28
288	HS	1	63	1.43571	0.022	0.421	0.018	0.084	0.846	0.308	0.064	0.052	0.132	0.007	0.066	0.662155	0.003	0.175277	0.051	0.214	0.023	0.192	0.022	3.369	0.00471947	0.0915526	0.119	0.025	0.037	0.079	5.206	0.021	90.6	261.84	157.03	74.95	181.67	43.92	105	2.1	0.58	1909.13	129.58	89.25	1635.71	218.83	194.36	221.71	269.4
289	HS	2	65	1.43571	0.004	0.532	0.01	0.065	0.882	0.272	0.217	0.032	0.142	0.002	0.095	0.662155	0.008	0.175277	0.068	0.265	0.033	0.17606	0.02	3.846	0.001	0.0915526	0.085	0.006	0.067	0.073	5.27	0.008	95.08	217.26	122.2	61.64	149.31	34.74	89.17	1.98	0.6	1621.41	146.19	94.41	1356.77	189.99	142.64	141.71	188.77
290	HS	1	80	1.43571	0.009	0.321	0.006	0.066	0.785	0.248	0.09	0.038	0.097	0.007	0.05	0.662155	0.00642394	0.175277	0.049	0.255	0.139	0.173	0.02	2.444	0.00471947	0.0915526	0.046	0.027	0.027	0.042	4.962	0.007	99.11	197.5	127.44	49.33	135.46	30.87	99.57	2.58	0.74	1810.5	174.74	79.41	1542.58	93.42	143.41	143.75	219.43
291	HS	1	72	1.43571	0.018	0.316	0.007	0.09	1.063	0.34	0.127	0.062	0.139	0.002	0.077	0.662155	0.005	0.175277	0.045	0.259	0.029	0.115	0.01	2.548	0.001	0.0915526	0.1	0.05	0.059	0.047	4.502	0.008	56.09	222.14	113.29	84.67	177.44	36.42	75.8	1.34	0.43	1378.32	60.67	58.05	1258.49	285.73	246.87	160.13	39.3
292	HS	2	67	1.43571	0.025	0.593	0.053	0.068	1.008	0.517	0.153	0.045	0.094	0.002	0.098	0.837	0.004	0.175277	0.083	0.207	0.023	0.128	0.02	3.148	0.001	0.0915526	0.106506	0.004	0.011	0.091	4.197	0.012	102.63	230.28	101.66	89.76	206.49	40.17	81.53	1.13	0.39	1482.36	129.54	100.13	1202.76	333.78	200.48	135.3	66.82
293	HS	1	71	1.43571	0.01	0.509	0.017	0.088	0.91	0.393	0.112	0.1	0.146	0.01	0.072	0.662155	0.02	0.175277	0.061	0.259	0.016	0.217	0.014	3.31	0.003	0.0915526	0.026	0.007	0.016	0.032	3.816	0.015	166.23	166.41	87.36	27.4	112.2	26.98	81.28	3.19	0.72	1477.88	167.04	71.64	1294.29	112.38	0	67.49	269.35
294	HS	1	71	1.43571	0.019	0.511	0.005	0.096	0.781	0.333	0.105	0.076	0.138	0.009	0.074	0.662155	0.006	0.207	0.066	0.271	0.015	0.162	0.011	3.267	0.004	0.0915526	0.106506	0.009	0.023	0.035	4.844	0.012	110.2	215.8	107.16	61.22	164.47	39.8	87.11	1.75	0.53	1583.83	164.23	116.48	1326.67	208.63	0	129.78	307.81
295	HS	2	67	1.43571	0.034	0.399	0.051	0.063	0.695	0.464	0.076	0.047	0.113	0.006	0.083	0.662155	0.002	0.153	0.062	0.224	0.027	0.119	0.019	2.388	0.00471947	0.0915526	0.095	0.031	0.033	0.058	4.741	0.024	51.16	248.25	147.09	83.22	187.84	40.72	93.45	1.77	0.5	1699.16	37.41	64.82	1688.1	243.21	164.12	271.04	311.81
296	HS	2	76	1.43571	0.019	0.448	0.013	0.115	0.738	0.447	0.074	0.042	0.121	0.006	0.06	0.662155	0.00642394	0.175277	0.051	0.192	0.01	0.19	0.01	2.952	0.005	0.0915526	0.106506	0.002	0.012	0.049	4.738	0.013	92.87	302.68	195.04	75.36	197.99	50.21	130.07	2.59	0.66	2365.02	99.7	129.42	2197.47	312.67	215.41	364.03	497.65
297	CENTOS	1	70	1.43571	0.007	0.463	0.012	0.071	0.884	0.329	0.076	0.067	0.145	0.00570588	0.09	0.662155	0.00642394	0.175277	0.061	0.342	0.029	0.094	0.023	4.088	0.001	0.0915526	0.025	0.008	0.034	0.099	4.875	0.022	72.66	263.85	177.79	55.78	127.62	30.7	134.32	3.19	1.05	2442.35	115.05	144.03	2263.27	231.54	154.29	181.62	317.92
298	CENTOS	2	79	1.43571	0.007	0.34	0.012	0.05	0.824	0.281	0.069	0.037	0.088	0.00570588	0.068	0.662155	0.00642394	0.175277	0.06	0.217	0.065	0.108	0.021	3.278	0.001	0.0915526	0.069	0.038	0.021	0.086	4.661	0.025	97.75	258.25	160.09	62.81	154.24	33.27	125.35	2.55	0.81	2279.2	147.3	87	1994.2	251.61	161.95	207.62	268.42
299	CENTOS	2	72	1.43571	0.015	0.417	0.011	0.07	0.917	0.293	0.078	0.045	0.126	0.006	0.083	0.662155	0.011	0.175277	0.061	0.279	0.012	0.158	0.026	2.233	0.001	0.0915526	0.024	0.01	0.023	0.032	4.412	0.04	164.24	257.76	129.77	69.31	180.04	38.6	113.96	1.87	0.63	2072.02	221.08	134.22	1627.42	352.33	154.73	147.83	200.36
300	CENTOS	2	59	1.43571	0.032	0.375	0.03	0.074	0.783	0.29	0.067	0.08	0.156	0.00570588	0.088	0.662155	0.001	0.175277	0.099	0.288	0.024	0.147	0.028	2.741	0.001	0.0915526	0.097	0.008	0.046	0.05	6.43	0.008	66.59	250.77	149.7	76.83	179.69	41.57	102.49	1.95	0.57	1863.48	71.03	95.83	1674.02	285.85	223.66	234.21	248.33
301	CENTOS	1	58	1.43571	0.056	0.644	0.009	0.078	0.784	0.308	0.079	0.087	0.123	0.023	0.076	0.662155	0.001	0.135	0.076	0.254	0.045	0.17606	0.016	4.163	0.001	0.015	0.052	0.007	0.053	0.111	5.575	0.008	51.42	204.58	121.55	69.73	171.74	40.36	82.93	1.74	0.48	1507.92	55.94	45.15	1380.1	94.69	107.44	135.45	229.87
302	CENTOS	2	55	1.43571	0.012	0.455	0.015	0.063	0.896	0.532	0.071	0.053	0.079	0.006	0.057	0.55	0.002	0.079	0.06	0.23	0.013	0.178	0.019	2.897	0.001	0.0915526	0.056	0.006	0.029	0.096	5.134	0.019	76	242.71	137.75	81.1	191.35	40.79	92.15	1.7	0.48	1675.49	78.4	69.39	1523.74	247.84	205.99	230.78	237.14
303	CENTOS	2	84	1.43571	0.039	0.63	0.031	0.084	0.862	0.385	0.193	0.041	0.173	0.00570588	0.088	0.662155	0.002	0.175277	0.061	0.253	0.033	0.109	0.01	3.741	0.001	0.044	0.106506	0.011	0.024	0.113	4.647	0.221	79.97	273.61	165.75	87.4	200.23	50.95	118.51	1.9	0.59	2154.75	91.1	88.96	1978.98	247.08	208.06	236.31	283.55
304	CENTOS	1	77	1.43571	0.018	0.429	0.002	0.078	0.91	0.45	0.172	0.052	0.14	0.001	0.076	0.662155	0.00642394	0.175277	0.052	0.211	0.052	0.17606	0.025	2.976	0.001	0.0915526	0.07	0.015	0.071	0.061	4.001	0.013	82.24	209.96	124.48	59.68	132.5	33.35	92.83	2.09	0.7	1687.98	149.47	110.8	1434.96	227.99	213.11	152.42	166.7
305	CENTOS	2	65	1.43571	0.01	0.454	0.025	0.066	0.758	0.424	0.162	0.069	0.134	0.00570588	0.077	0.662155	0.00642394	0.175277	0.057	0.224	0.026	0.13	0.016	3.852	0.00471947	0.013	0.172	0.023	0.053	0.126	4.423	0.009	94.89	237.92	126.26	74.87	188.97	45.02	108.41	1.69	0.57	1971.1	137.4	137.51	1635.1	349.17	139.4	164.43	245.63
306	CENTOS	2	89	1.43571	0.008	0.358	0.054	0.076	0.71	0.517	0.071	0.045	0.13	0.004	0.064	0.662155	0.003	0.242	0.062	0.286	0.021	0.169	0.024	2.581	0.00471947	0.0915526	0.061	0.0235242	0.053	0.07	5.361	0.011	100.17	192.97	94.54	66.61	163.86	37.46	80.05	1.42	0.49	1455.61	143.88	82.11	1148.43	229.61	106.38	103.39	136.06
307	CENTOS	2	66	1.43571	0.0221561	0.526	0.059	0.046	0.734	0.525	0.081	0.054	0.127	0.00570588	0.086	0.662155	0.006	0.175277	0.078	0.259	0.011	0.133	0.013	5.322	0.001	0.0915526	0.106506	0.011	0.038	0.16	3.281	0.015	184.49	365.6	232.22	72.4	180.82	48.69	191.69	3.21	1.06	3485.41	284.66	238.8	2991.89	417.05	202.03	272.16	478.25
308	CENTOS	1	63	1.43571	0.022	0.584	0.004	0.057	0.754	0.313	0.106	0.057	0.17	0.008	0.072	0.662155	0.005	0.147	0.064	0.312	0.013	0.173	0.021	4.123	0.00471947	0.0915526	0.106506	0.01	0.065	0.152	4.841	0.008	98.16	166	71.8	72.43	184.45	40.38	57.88	0.99	0.31	1052.36	143.84	54.38	805.41	99.88	83.31	59.07	117.15
309	CENTOS	1	78	1.43571	0.027	0.569	0.065	0.104	0.762	0.318	0.075	0.051	0.091	0.006	0.066	0.662155	0.006	0.095	0.085	0.286	0.021	0.16	0.016	2.729	0.001	0.017	0.106506	0.0235242	0.031	0.081	7.124	0.009	71.13	299.82	183.53	95.45	204.78	39.09	122.55	1.92	0.6	2228.35	51.33	70.74	2111.27	279.69	244.36	286.64	275.05
310	CENTOS	2	74	1.43571	0.004	0.432	0.035	0.071	0.797	0.528	0.183	0.038	0.113	0.001	0.078	0.662155	0.001	0.175277	0.053	0.209	0.035	0.126	0.016	3.261	0.001	0.008	0.036	0.012	0.03	0.081	4.452	0.006	40.68	211.65	137.16	59.36	137.26	33.77	96.09	2.31	0.7	1747.18	52.08	51.56	1648.31	165.81	161.71	165.95	176
311	CENTOS	1	84	1.43571	0.011	0.466	0.005	0.079	0.851	0.285	0.086	0.067	0.132	0.007	0.063	0.662155	0.004	0.154	0.058	0.233	0.028	0.172	0.015	3.301	0.001	0.0915526	0.073	0.012	0.051	0.112	5.328	0.011	62.17	230.93	146.79	64.84	169.8	39.86	106.3	2.26	0.63	1932.77	57.86	74.54	1794.71	211.51	135.09	231.86	342.3
312	CENTOS	1	78	1.43571	0.024	0.418	0	0.124	0.773	0.208	0.08	0.084	0.186	0.004	0.071	0.662155	0.004	0.175277	0.073	0.295	0.022	0.169	0.017	2.354	0.002	0.0915526	0.206	0.025	0.066	0.051	6.494	0.028	145.19	155.07	65.04	59.47	164.93	38.51	65.8	1.09	0.4	1196.42	233.85	89.59	830.65	86.97	49.14	2.14	92.19
313	CENTOS	1	63	1.43571	0.018	0.358	0.013	0.072	0.795	0.242	0.083	0.047	0.1	0.006	0.05	0.662155	0.006	0.217	0.052	0.265	0.032	0.152	0.016	2.574	0.003	0.0915526	0.139	0.048	0.049	0.046	5.626	0.005	81.38	238.85	147.38	68.5	171.38	39.56	104.5	2.15	0.61	1900.07	108.97	69.11	1669.17	192.32	152.58	213.65	290.77
314	CENTOS	1	72	1.43571	0.008	0.51	0.012	0.108	0.851	0.266	0.074	0.066	0.128	0.008	0.06	0.662155	0.03	0.175277	0.086	0.273	0.015	0.228	0.015	3.372	0.001	0.0915526	0.04	0.003	0.029	0.08	4.382	0.006	281.49	255.89	127.7	59.01	170.11	40.14	115.38	2.16	0.68	2097.93	340.91	108.05	1624.87	192.65	37.01	121.32	239.18
315	CENTOS	2	73	1.43571	0.016	0.448	0.039	0.062	0.764	0.27	0.079	0.03	0.135	0.00570588	0.057	0.662155	0.003	0.175277	0.055	0.2	0.02	0.17606	0.021	3.143	0.001	0.0915526	0.106506	0.007	0.022	0.079	4.834	0.013	97.13	239.36	132.13	78.69	206.24	48.5	103.13	1.68	0.5	1875.18	129.82	94.77	1612.75	224.65	107.33	159.37	292.4
316	CENTOS	2	67	1.43571	0.03	0.408	0.021	0.051	0.999	0.327	0.068	0.054	0.072	0.00570588	0.054	0.662155	0.001	0.175277	0.044	0.17	0.073	0.157	0.019	2.506	0.001	0.0915526	0.052	0.014	0.028	0.065	5.164	0.01	59.2	231.16	145.38	69.92	169.75	38.78	105.71	2.08	0.62	1922.06	67.93	85.73	1737.82	236.28	175.49	213.82	281.4
317	CENTOS	2	74	1.43571	0.044	0.419	0.064	0.059	0.797	0.271	0.066	0.049	0.155	0.006	0.054	0.662155	0.006	0.175277	0.054	0.186	0.018	0.111	0.024	2.582	0.001	0.0915526	0.106506	0.007	0.038	0.048	4.386	0.009	106.81	208.93	112.63	69.43	172.26	39.59	93.84	1.62	0.54	1706.28	167.63	71	1409.27	204.59	112.04	108.56	161.22
318	CENTOS	2	71	1.43571	0.006	0.442	0.012	0.077	0.894	0.371	0.102	0.059	0.15	0.002	0.095	0.662155	0.007	0.175277	0.068	0.23	0.027	0.15	0.02	4.086	0.00471947	0.0915526	0.059	0.015	0.04	0.09	3.987	0.017	119.4	237.29	119.4	75.05	185.03	42.4	101.94	1.59	0.55	1853.54	161.83	103.54	1502.79	287.02	115.97	141.2	218.21
319	CENTOS	2	76	1.43571	0.046	0.58	0.01	0.068	0.85	0.333	0.084	0.058	0.115	0.007	0.075	0.662155	0.002	0.175277	0.066	0.252	0.014	0.175	0.01	3.094	0.00471947	0.0915526	0.106506	0.013	0.021	0.091	4.86	0.034	88.96	190.6	90.2	76.18	183.32	39.92	71.87	1.18	0.39	1306.81	117.18	81.9	1075.86	205.02	116.19	93.97	129.96
320	CENTOS	2	63	1.43571	0.043	0.479	0.007	0.064	0.893	0.343	0.072	0.031	0.104	0.005	0.065	0.637	0.005	0.103	0.054	0.211	0.014	0.146	0.026	4.835	0.002	0.0915526	0.052	0.008	0.015	0.122	4.447	0.017	52.5	213.55	121.29	77.34	173.09	39.93	76.54	1.57	0.44	1391.73	53.66	45.07	1282.2	226.06	207.69	210.15	176.57
321	CENTOS	2	70	1.43571	0.011	0.566	0.045	0.064	1.031	0.379	0.116	0.143	0.219	0.009	0.099	0.662155	0.003	0.303	0.117	0.342	0.023	0.141	0.034	2.293	0.002	0.0915526	0.043	0.02	0.041	0.068	5.082	0.011	101.12	193.11	101.68	63.97	157.19	32.21	84.03	1.59	0.53	1527.95	116.11	85.87	1245.67	198.55	154.26	88.48	133.81
322	CENTOS	1	68	1.43571	0.014	0.497	0.028	0.07	0.846	0.281	0.07	0.057	0.104	0.00570588	0.059	0.662155	0.002	0.175277	0.068	0.22	0.015	0.156	0.016	2.875	0.002	0.0915526	0.039	0.006	0.016	0.059	5.511	0.01	73.7	206.23	120.78	63.27	158.39	37.39	86.27	1.91	0.54	1568.61	87.98	90.6	1405.66	264.01	217.52	210.49	205.42
323	CENTOS	2	72	1.43571	0.016	0.332	0.032	0.069	0.859	0.286	0.1	0.049	0.089	0.00570588	0.063	0.662155	0.006	0.175277	0.037	0.229	0.091	0.147	0.023	2.527	0.001	0.0915526	0.135	0.021	0.04	0.032	6.577	0.014	80.42	195.35	107.55	63.7	148.41	32.57	81.5	1.69	0.55	1481.95	97.87	68.85	1301.76	227.75	148.46	167.71	168.4
324	CENTOS	2	56	1.43571	0.017	0.501	0.033	0.074	0.936	0.347	0.084	0.067	0.145	0.013	0.068	0.662155	0.004	0.305	0.063	0.223	0.023	0.14	0.024	2.565	0.00471947	0.0915526	0.106506	0.008	0.01	0.05	4.267	0.012	84.99	199.71	107.02	67.64	169.12	37.8	80.89	1.58	0.48	1470.71	104.66	71.59	1248.72	242.95	187.5	166.98	172.12
325	CENTOS	1	75	1.43571	0.018	0.568	0.007	0.076	0.81	0.217	0.074	0.108	0.154	0.006	0.117	0.662155	0.005	0.175277	0.086	0.334	0.017	0.223	0.033	3.933	0.00471947	0.0915526	0.081	0.0235242	0.017	0.08	8.422	0.015	170.78	198.07	105.81	44.36	129.96	31.42	102.23	2.39	0.79	1858.77	223.47	117.73	1474.91	180.59	19.88	58.54	211.67
326	CENTOS	1	76	1.43571	0.027	0.34	0.01	0.065	0.926	0.252	0.06	0.043	0.093	0.006	0.053	0.662155	0.002	0.131	0.055	0.197	0.023	0.121	0.015	2.976	0.003	0.0915526	0.171	0.05	0.028	0.066	4.378	0.016	72	189.91	103.65	65.06	152.82	31.17	81.7	1.59	0.53	1485.53	94.08	67.69	1306.69	231.88	173.46	150.66	134.42
327	CENTOS	2	67	1.43571	0.017	0.346	0.026	0.046	0.905	0.39	0.074	0.054	0.132	0.007	0.077	0.662155	0.003	0.175277	0.067	0.226	0.039	0.12	0.018	2.081	0.00471947	0.0915526	0.113	0.022	0.022	0.045	5.383	0.006	61.01	202.3	116.27	68.16	168.22	37.53	84.18	1.71	0.5	1530.67	65.36	59.04	1334.91	215.32	138.38	163.6	217.08
328	CENTOS	2	70	1.43571	0.017	0.504	0.02	0.059	0.912	0.267	0.095	0.038	0.096	0.00570588	0.071	0.662155	0.004	0.175277	0.063	0.174	0.018	0.079	0.026	2.626	0.004	0.0915526	0.106506	0.01	0.009	0.076	5.321	0.013	102.9	215.99	128.54	54.69	138.77	30.58	98.53	2.35	0.71	1791.56	142.45	67.8	1546.13	218.72	159.27	175.63	220.65
329	CENTOS	2	75	1.43571	0.048	0.469	0.019	0.092	0.961	0.375	0.076	0.052	0.102	0.01	0.053	0.662155	0.005	0.175277	0.073	0.224	0.034	0.199	0.02	2.963	0.002	0.0915526	0.106506	0.014	0.014	0.086	4.66	0.021	93.23	216.79	88.81	103.02	233.07	45.03	66.45	0.86	0.29	1208.26	86.44	49.92	1019.87	228.33	122.48	108.8	81.92
330	CENTOS	2	69	1.43571	0.002	0.413	0.043	0.091	0.772	0.36	0.077	0.075	0.118	0.006	0.077	0.719	0.005	0.175277	0.076	0.29	0.05	0.17606	0.024	2.572	0.001	0.0915526	0.062	0.011	0.019	0.081	5.431	0.03	180.34	256.24	150.47	49.79	135.1	31.72	126.51	3.02	0.94	2300.22	289.01	129.07	1841.92	194.05	122.3	156.32	302.42
331	CENTOS	2	66	1.43571	0.01	0.461	0.037	0.056	0.893	0.453	0.058	0.043	0.132	0.003	0.063	0.827	0.009	0.175277	0.075	0.196	0.041	0.17606	0.015	2.805	0.00471947	0.0915526	0.106506	0.01	0.017	0.072	6.213	0.019	138.47	243.3	136.58	61.97	174.07	42.6	109.67	2.2	0.63	1994.14	180.33	103.58	1659.14	225.09	104.14	144.85	277.01
332	CENTOS	2	72	1.43571	0.021	0.519	0.082	0.076	0.989	0.376	0.077	0.051	0.077	0.007	0.064	0.662155	0.006	0.191	0.064	0.248	0.018	0.169	0.018	2.991	0.003	0.0915526	0.036	0.0235242	0.02	0.093	5.616	0.011	78.96	261.66	144.13	94.41	202.17	38.58	101.72	1.53	0.5	1849.63	81.72	91.17	1690.26	364.03	283.97	242.82	175.78
333	CENTOS	2	73	1.43571	0.008	0.507	0.013	0.08	0.917	0.352	0.068	0.05	0.106	0.011	0.053	0.662155	0.014	0.175277	0.065	0.257	0.019	0.108	0.024	2.685	0.00471947	0.0915526	0.106506	0.017	0.025	0.058	4.593	0.017	169.9	231.03	105.72	67.14	190.3	42.78	95.59	1.57	0.5	1738.17	225.59	85	1363.87	254.67	74.81	113.69	194.51
334	CENTOS	1	59	1.43571	0.012	0.415	0.001	0.095	0.938	0.302	0.081	0.083	0.135	0.00570588	0.12	1.029	0.00642394	0.175277	0.08	0.257	0.02	0.159	0.022	2.633	0.002	0.0915526	0.025	0.01	0.02	0.057	4.642	0.012	77.62	211.98	123.6	59.81	157.76	35.88	93.26	2.07	0.59	1695.71	103.35	97.72	1431.84	258.14	183.59	175.05	230.8
335	CENTOS	2	71	1.43571	0.05	0.436	0.012	0.067	0.903	0.396	0.08	0.052	0.126	0.01	0.05	0.662155	0.005	0.175277	0.073	0.237	0.008	0.184	0.022	2.241	0.004	0.0915526	0.106506	0.01	0.013	0.106	5.561	0.013	105.97	212.71	110.04	68.22	168.42	39.3	85.15	1.61	0.51	1548.31	133.28	91.44	1299.82	273.38	182.16	163.33	165.04
336	CENTOS	2	76	1.43571	0.035	0.483	0.052	0.028	0.796	0.333	0.08	0.043	0.088	0.005	0.076	0.662155	0.00642394	0.111	0.082	0.21	0.008	0.236	0.013	2.915	0.003	0.0915526	0.027	0.007	0.023	0.063	4.125	0.012	74.4	239.53	138.08	72.48	175.76	36.06	95.49	1.91	0.54	1736.26	79.59	88.42	1631.92	278.33	157.62	264.91	315.27
337	CENTOS	1	69	1.43571	0.022	0.472	0.006	0.094	0.754	0.313	0.086	0.096	0.138	0.008	0.051	0.662155	0.003	0.175277	0.07	0.261	0.009	0.17	0.019	3.293	0.004	0.0915526	0.02	0.007	0.011	0.09	5.974	0.015	105.01	206.27	118.8	56.57	147.75	36.54	85.75	2.1	0.58	1559.09	120.87	78.36	1406.83	132.96	74.51	165.84	302.22
338	CENTOS	2	72	1.43571	0.031	0.485	0.04	0.056	0.732	0.336	0.062	0.058	0.094	0.007	0.066	0.662155	0.004	0.175277	0.065	0.22	0.0310346	0.182	0.008	2.716	0.002	0.0915526	0.024	0.006	0.016	0.049	4.91	0.007	88.54	243.52	135.41	75.34	177.3	39.96	97.53	1.8	0.55	1773.36	116.9	92.67	1577.7	252.95	156.37	210.53	257.74
339	CENTOS	1	67	1.43571	0.023	0.318	0.027	0.101	0.659	0.284	0.066	0.049	0.135	0.008	0.075	0.662155	0.003	0.122	0.055	0.257	0.015	0.135	0.018	4.094	0.016	0.019	0.174	0.047	0.06	0.046	4.204	0.019	84.79	275.08	167.05	73.59	179.17	39.46	110.88	2.27	0.62	2016.04	102.57	88.7	1852.4	271.96	166.59	301.01	395.99
340	CENTOS	1	77	1.43571	0.012	0.583	0.002	0.09	0.911	0.302	0.084	0.101	0.135	0.007	0.059	0.662155	0.003	0.175277	0.06	0.283	0.005	0.216	0.018	4.614	0.003	0.0915526	0.106506	0.003	0.011	0.04	5.765	0.011	96.66	211.27	129.02	44.68	131.12	37.06	96.66	2.89	0.74	1757.57	131.66	121.59	1572.32	176.53	37.3	172.1	344.68
341	CENTOS	2	73	1.43571	0.015	0.525	0.06	0.054	0.717	0.378	0.073	0.04	0.095	0.009	0.05	0.27	0.004	0.203	0.066	0.205	0.005	0.154	0.013	3.461	0.002	0.0915526	0.106506	0.004	0.017	0.106	4.797	0.008	77.17	217.27	107.82	82.09	192.34	41.55	78.17	1.31	0.41	1421.31	76.47	73.16	1302.8	282.07	130.9	204.16	241.63
342	DN2PD	2	59.6917	1.43571	0.036	0.54	0.012	0.082	0.706	0.424	0.078	0.0551088	0.062	0.006	0.055	0.662155	0.00642394	0.116	0.052	0.202	0.005	0.193	0.046	3.49	0.005	0.0915526	0.106506	0.001	0.014	0.034	4.747	0.012	50.49	253.88	156.83	81.43	174.78	36.34	97.3	1.93	0.56	1769.17	32.47	56.88	1695.77	319.79	320.55	311.72	207.75
343	DN2PD	2	42.2806	1.43571	0.019	0.299	0.026	0.07	0.615	0.296	0.072	0.023	0.073	0.005	0.036	0.662155	0.00642394	0.076	0.038	0.142	0.027	0.192	0.016	2.655	0.001	0.0915526	0.139	0.04	0.024	0.102	4.408	0.009	47.51	176.73	95.48	71.42	178.1	39.93	64.36	1.34	0.36	1170.15	31.77	29.8	1109.7	113.18	108.27	180.52	228.44
344	DN2PD	1	54.0444	1.43571	0.009	0.594	0.05	0.068	0.692	0.256	0.083	0.076	0.18	0.007	0.07	0.662155	0.00642394	0.175277	0.079	0.377	0.004	0.174	0.029	4.506	0.005	0.0915526	0.04	0.008	0.023	0.108	5.373	0.008	214.17	294.08	158.42	59.61	177.59	43.98	138.7	2.66	0.78	2521.94	226.82	171.58	2078.21	269.52	88.32	140.58	305.4
345	DN2PD	1	68.8556	1.43571	0.031	0.369	0.008	0.073	0.833	0.289	0.087	0.065	0.147	0.005	0.073	0.662155	0.00642394	0.162	0.053	0.246	0.032	0.185	0.027	2.995	0.01	0.0915526	0.218	0.05	0.069	0.047	4.867	0.015	64.71	240.22	132.74	90.89	198.39	41.13	87.87	1.46	0.44	1597.76	58.55	58.54	1433.15	222.91	205.31	199.9	171.26
346	DN2PD	1	69.7889	1.43571	0.029	0.438	0.019	0.107	0.764	0.171	0.069	0.065	0.102	0.009	0.042	0.662155	0.013	0.175277	0.059	0.302	0.028	0.171	0.032	1.697	0.002	0.0915526	0.105	0.0235242	0.04	0.072	5.908	0.015	171.15	182.73	82.03	56.7	171.22	35.86	83.16	1.45	0.49	1512.13	220.77	56.32	1119.19	117	0	37.25	143.78
347	HS	2	55	1.43571	0.016	0.368	0.014	0.077	0.935	0.425	0.091	0.057	0.107	0.006	0.051	0.662155	0.00642394	0.14	0.054	0.172	0.032	0.137	0.039	1.482	0.004	0.0915526	0.056	0.017	0.018	0.036	4.572	0.007	72.77	248.52	142.52	83.25	208.79	51.77	96.93	1.71	0.46	1762.5	73.75	99.1	1544.17	250.5	162.55	213.35	280.88
348	HS	2	59	1.43571	0.024	0.398	0.035	0.081	0.742	0.294	0.082	0.055	0.104	0.006	0.065	0.662155	0.007	0.171	0.056	0.249	0.016	0.187	0.025	2.324	0.008	0.0915526	0.126	0.028	0.038	0.105	5.165	0.01	103.35	299.79	181	86.36	210.13	41.85	132.12	2.1	0.63	2402.35	129.3	160.58	2115.77	404.41	303.24	327.27	357.81
349	HS	2	52	1.43571	0.022	0.447	0.006	0.059	0.945	0.426	0.078	0.058	0.097	0.007	0.053	0.662155	0.00642394	0.24	0.058	0.225	0.018	0.162	0.013	0.981	0.003	0.0915526	0.029	0.006	0.013	0.061	6.286	0.008	74.18	218.95	119.95	77.41	196.16	41.99	81.01	1.55	0.41	1473.04	83.66	75.49	1302.61	214.56	201.41	209.51	220.92
350	HS	2	70	1.43571	0.035	0.338	0.007	0.062	0.687	0.26	0.068	0.03	0.074	0.004	0.049	0.662155	0.00642394	0.199	0.052	0.202	0.034	0.164	0.039	2.68	0.006	0.0915526	0.106506	0.013	0.029	0.054	4.865	0.011	97.86	261	131.2	102.33	235.04	41.61	93.32	1.28	0.4	1696.78	109.21	87.17	1477.67	295.56	225.55	215.23	172.57
351	HS	1	71	1.43571	0.02	0.614	0.008	0.076	0.889	0.286	0.101	0.08	0.115	0.007	0.044	0.662155	0.00642394	0.22	0.055	0.246	0.015	0.157	0.032	2.084	0.005	0.0915526	0.024	0.011	0.013	0.137	6.018	0.011	80.15	326.71	219.49	69.94	191.39	53.28	157.26	3.14	0.82	2859.47	75.2	179.79	2628.29	325.95	172.11	343.52	565.76
352	HS	1	84	1.43571	0.023	0.432	0.035	0.102	0.873	0.215	0.071	0.062	0.157	0.006	0.062	0.662155	0.00642394	0.175277	0.068	0.283	0.021	0.079	0.022	1.025	0.004	0.0915526	0.037	0.007	0.02	0.038	5.596	0.017	69.13	298.37	209.86	69.11	179.33	40.68	137.27	3.04	0.77	2496.02	73.89	87.68	2332.39	215.83	220.09	329.85	461.84
353	HS	1	68	1.43571	0.02	0.504	0.005	0.079	0.819	0.258	0.067	0.073	0.143	0.00570588	0.06	0.662155	0.012	0.175277	0.059	0.219	0.024	0.11	0.031	1.328	0.003	0.0915526	0.106506	0.007	0.022	0.055	5.176	0.017	164.59	181.98	78.32	58.48	186.72	35.68	71.82	1.34	0.38	1305.95	196	74.91	944.45	162.6	109.17	73.13	132.75
354	HS	1	63	1.43571	0.006	0.556	0.006	0.106	0.803	0.305	0.068	0.064	0.144	0.00570588	0.063	0.662155	0.011	0.175277	0.06	0.219	0.027	0.122	0.026	1.601	0.003	0.0915526	0.041	0.012	0.015	0.076	5.129	0.015	130.19	282.41	184.8	59.29	160.96	39.11	137.6	3.12	0.85	2502.02	153.53	96.66	2229.6	215.18	137.05	237.31	388.73
355	HS	1	63	1.43571	0.017	0.457	0.032	0.1	0.66	0.197	0.046	0.085	0.141	0.005	0.05	0.662155	0.00642394	0.175277	0.049	0.306	0.024	0.126	0.024	1.546	0.002	0.0915526	0.038	0.009	0.018	0.088	8.717	0.014	285.95	290.01	172.23	54.85	161.17	40.61	140.25	3.14	0.87	2550.16	344.59	149.03	2105.87	103.41	107.95	142.23	319.08
356	HS	1	62	1.43571	0.011	0.4	0.002	0.085	0.698	0.278	0.054	0.049	0.135	0.004	0.055	0.662155	0.006	0.175277	0.049	0.236	0.0310346	0.139	0.024	0.968	0.00471947	0.0915526	0.106506	0.002	0.015	0.044	5.078	0.014	137.08	253.61	167.39	64.14	150.95	35.98	113.17	2.61	0.75	2057.69	171.61	79.01	1853.78	159.75	242.37	260.26	272.19
357	HS	2	74	1.43571	0.022	0.364	0.032	0.057	0.918	0.426	0.07	0.039	0.083	0.006	0.05	0.662155	0.007	0.175277	0.055	0.171	0.032	0.103	0.033	1.208	0.002	0.0915526	0.066	0.012	0.021	0.033	4.955	0.012	85.14	230.48	123.21	91.07	204.37	39.71	88.07	1.35	0.43	1601.4	97.79	45.13	1454.07	223.1	214.96	203.37	154.92
358	HS	1	62	1.43571	0.002	0.411	0.003	0.088	0.859	0.296	0.072	0.074	0.113	0.00570588	0.042	0.662155	0.003	0.177	0.047	0.29	0.038	0.151	0.029	2.213	0.015	0.0915526	0.262	0.123	0.082	0.084	6.005	0.007	62.15	226.44	154.28	56.75	136.64	32.94	105.16	2.72	0.77	1912.07	95.55	88.52	1765.15	214.37	236.63	260.71	272.8
359	HS	1	70	1.43571	0.012	0.293	0.007	0.09	0.827	0.245	0.065	0.052	0.162	0.00570588	0.05	0.662155	0.006	0.175277	0.049	0.217	0.032	0.144	0.02	1.205	0.025	0.0915526	0.439	0.174	0.081	0.057	5.225	0.008	79.81	246.62	162.62	62.55	162.59	37.26	110.2	2.6	0.68	2003.66	100.4	85.06	1803.38	167.66	176.83	236.76	340.31
360	HS	2	59	1.43571	0.01	0.369	0.009	0.089	0.706	0.252	0.056	0.061	0.138	0.006	0.078	0.662155	0.00642394	0.175277	0.068	0.28	0.024	0.109	0.015	0.955	0.003	0.0915526	0.106506	0.023	0.018	0.086	5.882	0.013	155.59	295.63	184.64	60.71	161.93	39.51	141.16	3.04	0.87	2566.58	199.17	184.09	2211.44	314.49	204.88	263.37	413.48
361	HS	1	60	1.43571	0.02	0.513	0.009	0.087	0.983	0.304	0.075	0.057	0.102	0.006	0.039	0.662155	0.008	0.175277	0.06	0.205	0.032	0.142	0.023	1.695	0.004	0.0915526	0.037	0.01	0.014	0.068	5.54	0.009	128.31	301.19	191.97	66.27	171.55	38.06	133.61	2.9	0.78	2429.3	162.87	117.86	2143.77	341.55	269.5	348.37	406.24
362	HS	1	70	1.43571	0.019	0.512	0.016	0.128	0.837	0.284	0.079	0.05	0.131	0.011	0.066	0.662155	0.009	0.175277	0.075	0.258	0.0310346	0.161	0.032	1.532	0.004	0.0915526	0.026	0.01	0.051	0.071	5.117	0.016	175.23	202.85	115.45	47.93	144.54	30.34	102.54	2.41	0.71	1864.42	265.26	111.68	1472.22	139.4	111.45	117.71	221.74
363	HS	1	55	1.43571	0.006	0.61	0.04	0.068	0.701	0.223	0.065	0.117	0.179	0.006	0.082	0.662155	0.003	0.175277	0.099	0.306	0.012	0.125	0.036	1.763	0.001	0.0915526	0.034	0.0235242	0.013	0.132	7.638	0.011	188.96	230.42	130.57	52.21	168.09	36.63	114.45	2.5	0.68	2081.08	237.36	162.03	1724.03	147.49	113.34	128.32	325.4
364	HS	1	72	1.43571	0.006	0.453	0.019	0.1	0.807	0.265	0.067	0.064	0.105	0.007	0.058	0.662155	0.012	0.175277	0.067	0.22	0.013	0.139	0.02	2.128	0.004	0.0915526	0.037	0.013	0.023	0.096	5.614	0.008	222.22	270.85	161.91	51.27	153.62	35.41	132.57	3.16	0.86	2410.4	234.06	82.49	2032.36	171.47	130.49	143.58	222.48
365	HS	1	62	1.43571	0.004	0.397	0	0.101	0.826	0.254	0.078	0.039	0.098	0.00570588	0.047	0.662155	0.001	0.135	0.047	0.171	0.036	0.152	0.039	0.999	0.006	0.0915526	0.106506	0.01	0.021	0.056	5.557	0.013	70.66	226.42	154.24	54.21	144.29	34.46	104.63	2.85	0.73	1902.52	107.91	82.84	1727.51	172.91	208.5	266.35	344.02
366	HS	2	64	1.43571	0.025	0.202	0.025	0.088	0.672	0.532	0.053	0.024	0.058	0.005	0.042	0.662155	0.004	0.099	0.036	0.148	0.03	0.21	0.015	1.167	0.013	0.0915526	0.246	0.131	0.052	0.068	5.298	0.009	63.56	236.15	118.23	106.11	228.21	41.3	80.32	1.11	0.35	1460.39	35.72	36.82	1437.75	248.83	232.61	212.91	117.13
367	HS	1	77	1.43571	0.025	0.392	0.01	0.098	0.764	0.229	0.085	0.049	0.124	0.01	0.059	0.662155	0.007	0.175277	0.065	0.23	0.023	0.154	0.029	1.445	0.003	0.0915526	0.056	0.011	0.018	0.062	5.646	0.022	96.05	239.34	163.69	47.85	142.26	30	119.82	3.42	0.84	2178.66	117.45	83.68	1973.21	196.66	176.53	266.41	392.05
368	HS	1	69	1.43571	0.02	0.353	0.017	0.12	0.69	0.224	0.067	0.056	0.125	0.007	0.054	0.662155	0.005	0.175277	0.057	0.249	0.026	0.121	0.026	1.509	0.002	0.0915526	0.043	0.015	0.02	0.089	5.813	0.013	109.84	275.03	187.91	54.64	149.43	35.17	130.55	3.44	0.87	2373.68	147.58	95.47	2142.7	170.08	154.57	275.91	447.55
369	HS	1	53	1.43571	0.002	0.491	0.034	0.082	0.71	0.167	0.045	0.066	0.15	0.005	0.038	0.662155	0.006	0.175277	0.057	0.297	0.016	0.139	0.036	1.768	0.002	0.0915526	0.065	0.008	0.017	0.102	7.278	0.008	157.98	222.18	139.22	45.14	149.59	32.03	110.07	3.08	0.74	2001.43	209.71	111.26	1725.07	134.68	137.07	158.67	309.21
370	HS	2	74	1.43571	0.012	0.647	0.034	0.056	0.756	0.228	0.085	0.053	0.075	0.00570588	0.05	0.662155	0.00642394	0.175277	0.064	0.235	0.016	0.153	0.02	1.961	0.002	0.0915526	0.106506	0.004	0.01	0.122	4.844	0.009	128.17	189.92	121.15	39.71	121.83	31.76	95.69	3.05	0.79	1739.97	161.49	87.84	1514.27	177.29	187.89	185.66	241
371	HS	1	67	1.43571	0.012	0.472	0.028	0.083	0.837	0.22	0.112	0.059	0.146	0.009	0.065	0.662155	0.008	0.175277	0.077	0.243	0.012	0.146	0.019	1.18	0.003	0.0915526	0.04	0.014	0.024	0.083	6.357	0.013	195.85	231.32	129.16	66.04	188.6	41.39	107.15	1.96	0.57	1948.35	214.66	82.1	1590.72	157.28	77.66	159.55	296.74
372	HS	2	54	1.43571	0.02	0.289	0.064	0.062	0.766	0.336	0.062	0.043	0.091	0.007	0.044	0.662155	0.00642394	0.175277	0.051	0.193	0.032	0.128	0.032	0.906	0.002	0.0915526	0.025	0.01	0.024	0.052	5.9	0.019	72.82	270.18	164.8	91.48	212.9	44.89	107.23	1.8	0.5	1949.71	75.66	68.38	1849.13	226.62	258.34	285.99	276.61
373	HS	2	63	1.43571	0.004	0.293	0.052	0.066	0.722	0.461	0.054	0.03	0.083	0.004	0.044	0.662155	0.003	0.175277	0.062	0.209	0.02	0.161	0.032	0.827	0.003	0.0915526	0.099	0.025	0.04	0.044	5.054	0.012	70.68	212.83	128.03	70.4	170.74	37.32	88.65	1.82	0.52	1611.82	90.89	55.1	1464.95	170.22	173.62	200.18	210.01
374	HS	1	68	1.43571	0.002	0.425	0.015	0.087	0.733	0.265	0.054	0.068	0.142	0.01	0.059	0.662155	0.00642394	0.175277	0.072	0.25	0.026	0.181	0.028	2.032	0.002	0.0915526	0.106506	0.01	0.012	0.067	5.071	0.01	101.38	293.74	190.08	64.24	161.56	38.55	139.43	2.96	0.86	2535.27	178.56	158.16	2171.26	221.53	155.11	227.21	400.86
375	HS	2	67	1.43571	0.005	0.546	0.023	0.081	0.714	0.252	0.061	0.052	0.096	0.007	0.053	0.662155	0.00642394	0.175277	0.063	0.21	0.012	0.151	0.029	2.254	0.004	0.0915526	0.036	0.01	0.019	0.107	5.787	0.007	287.56	317.83	172.32	60.29	172.49	38.82	158.02	2.86	0.92	2873.25	394.14	207.32	2250.1	276.43	143	112.42	233.81
376	HS	1	69	1.43571	0.007	0.553	0.004	0.102	0.796	0.237	0.063	0.067	0.134	0.005	0.069	0.662155	0.00642394	0.175277	0.069	0.255	0.029	0.206	0.024	1.946	0.003	0.0915526	0.039	0.006	0.02	0.078	5.958	0.018	105.03	240.79	154	59.37	162.06	35.55	105.6	2.59	0.65	1920.05	125.87	97.36	1687.64	170.37	170.44	237.08	323.13
377	HS	1	68	1.43571	0.008	0.49	0.009	0.089	0.764	0.257	0.061	0.082	0.082	0.011	0.051	0.662155	0.007	0.175277	0.066	0.255	0.019	0.136	0.022	0.923	0.001	0.0915526	0.047	0.006	0.021	0.073	5.914	0.024	168.11	266.85	157.44	47.86	150.43	30.71	137.21	3.29	0.91	2494.92	247.2	143.28	2073.84	195.43	96.81	120.67	286.63
378	HS	1	69	1.43571	0.02	0.441	0.006	0.103	0.827	0.236	0.071	0.044	0.111	0.006	0.054	0.662155	0.01	0.175277	0.073	0.261	0.025	0.182	0.033	1.547	0.003	0.0915526	0.078	0.0235242	0.023	0.075	5.559	0.013	143.98	209.57	123.39	52.1	161.23	30.26	95.18	2.37	0.59	1730.58	170.01	75.81	1486.37	132.87	98.02	186.83	316.61
379	HS	1	68	1.43571	0.03	0.363	0.022	0.075	0.779	0.255	0.054	0.061	0.133	0.006	0.055	0.662155	0.00642394	0.2	0.044	0.311	0.017	0.161	0.022	0.873	0.004	0.017	0.106506	0.013	0.026	0.042	5.049	0.01	75.76	186.76	106.16	55.97	155	32.54	86.79	1.9	0.56	1577.98	111.11	99.83	1353.45	226.91	135.26	157.5	227.28
380	HS	1	69	1.43571	0.016	0.506	0.029	0.124	0.744	0.246	0.072	0.062	0.107	0.007	0.048	0.662155	0.009	0.175277	0.06	0.31	0.017	0.186	0.017	1.965	0.002	0.0915526	0.064	0.017	0.018	0.12	6.299	0.01	196.8	272.89	162.95	58.61	172.31	40.12	130.26	2.78	0.76	2368.48	245.8	117.17	1979.41	149.14	62.49	152.51	332.2
381	HS	2	60	1.43571	0.029	0.464	0.035	0.078	0.809	0.237	0.075	0.053	0.091	0.009	0.055	0.662155	0.00642394	0.126	0.069	0.31	0.011	0.188	0.022	1.933	0.003	0.0915526	0.025	0.006	0.015	0.089	10.36	0.012	80.45	265.11	180.11	56.53	144.73	34.51	122.61	3.19	0.85	2229.36	111.97	124.42	2017.81	260.44	210.08	295.53	383.68
382	HS	1	55	1.43571	0.012	0.629	0.031	0.088	0.857	0.263	0.089	0.045	0.122	0.009	0.055	0.662155	0.005	0.175277	0.054	0.254	0.027	0.148	0.03	2.998	0.002	0.0915526	0.026	0.011	0.014	0.115	5.881	0.007	117.79	224.42	143.81	57.66	151.04	37.87	98.93	2.49	0.65	1798.73	143.78	86.19	1570.82	168.94	179.2	228.64	284.87
383	HS	1	68	1.43571	0.015	0.431	0.02	0.116	0.789	0.251	0.057	0.072	0.143	0.007	0.056	0.662155	0.00642394	0.175277	0.065	0.315	0.011	0.178	0.018	1.977	0.003	0.0915526	0.106506	0.022	0.017	0.131	7.079	0.014	125.28	245.22	148.99	54.23	161.38	29.99	117.81	2.75	0.73	2142.18	171.99	115.12	1872.25	165.51	82.17	169.31	344.82
384	HS	2	62	1.43571	0.023	0.383	0.023	0.08	0.796	0.276	0.072	0.056	0.102	0.006	0.066	0.662155	0.00642394	0.163	0.057	0.297	0.033	0.24	0.04	2.469	0.015	0.0915526	0.272	0.05	0.044	0.037	5.571	0.014	69.08	274.92	157.93	91.42	193.3	43.04	106.44	1.73	0.55	1935.34	62.32	97.83	1765.53	282.16	211.99	240.38	209.87
385	HS	1	71	1.43571	0.02	0.405	0.002	0.102	0.991	0.278	0.083	0.043	0.114	0.007	0.049	0.662155	0.00642394	0.175277	0.06	0.243	0.031	0.203	0.029	1.196	0.008	0.0915526	0.155	0.059	0.035	0.058	5.417	0.021	144.27	222.6	136.88	49.63	141.63	29.64	109.55	2.76	0.77	1991.95	209.99	115.72	1661.02	165.58	133.94	181.68	301.76
386	HS	1	57	1.43571	0.012	0.346	0.036	0.08	0.858	0.229	0.067	0.058	0.094	0.007	0.052	0.662155	0.02	0.175277	0.05	0.248	0.027	0.133	0.031	1.768	0.002	0.0915526	0.045	0.01	0.038	0.073	5.444	0.005	178.38	200.01	99.34	39.29	139.83	30.61	100.52	2.53	0.72	1827.65	252.12	75.33	1414.91	146.8	0	32.76	168.9
387	HS	1	70	1.43571	0.011	0.581	0.005	0.07	0.946	0.25	0.077	0.076	0.122	0.00570588	0.055	0.662155	0.004	0.149	0.074	0.228	0.023	0.129	0.026	2.731	0.004	0.0915526	0.029	0.005	0.015	0.151	6.359	0.009	50.2	223.45	152.74	61.38	154.76	35.1	96.95	2.49	0.63	1762.8	48.42	47.07	1683.71	155.79	214.34	274.81	313.48
388	HS	1	63	1.43571	0.006	0.538	0.009	0.106	0.805	0.318	0.072	0.0551088	0.107	0.007	0.05	0.662155	0.011	0.175277	0.074	0.23	0.033	0.142	0.03	1.243	0.005	0.0915526	0.029	0.008	0.025	0.114	6.242	0.012	286.66	239.29	102.78	50.58	159.36	39.91	109.82	2.03	0.69	1996.77	406.74	130.52	1427.1	145.43	14.13	7.18	120.14
389	HS	2	61	1.43571	0.007	0.452	0.042	0.079	0.826	0.323	0.064	0.072	0.115	0.005	0.046	0.662155	0.009	0.175277	0.053	0.241	0.016	0.207	0.027	2.356	0.002	0.0915526	0.064	0.003	0.022	0.06	7.504	0.014	204.63	238.04	94.01	56.66	163.03	42.79	98.9	1.66	0.61	1798.2	305.72	186.71	1257.3	329.5	84.33	94.44	145.35
390	HS	2	60	1.43571	0.02	0.464	0.032	0.077	0.79	0.272	0.09	0.041	0.123	0.00570588	0.046	0.662155	0.003	0.175277	0.054	0.241	0.02	0.083	0.02	1.18	0.004	0.0915526	0.017	0.009	0.02	0.069	5.841	0.011	98.61	233.01	133.34	67.73	187.37	40.81	99.05	1.97	0.53	1800.91	128.05	99.81	1573.79	230.26	188.51	193.54	249.85
391	HS	1	63	1.43571	0.012	0.46	0.024	0.128	0.899	0.222	0.08	0.076	0.166	0.007	0.072	0.662155	0.009	0.175277	0.053	0.287	0.02	0.169	0.023	1.531	0.004	0.0915526	0.051	0.008	0.028	0.054	6.039	0.008	108.81	196	106.84	55.75	144.55	32.09	90.16	1.92	0.62	1639.28	183.02	115.49	1309.25	212.52	140.8	118.02	169.83
392	HS	2	53	1.43571	0.008	0.334	0.008	0.08	0.818	0.252	0.076	0.054	0.067	0.006	0.054	0.662155	0.006	0.175277	0.055	0.212	0.014	0.16	0.026	1.216	0.002	0.0915526	0.037	0.0235242	0.013	0.074	6.043	0.017	181.64	270.54	166.7	54.65	170.23	40.23	127.8	3.05	0.75	2323.75	234.91	135.19	1958.14	183.82	104.5	223.62	425.47
393	HS	1	56	1.43571	0.006	0.475	0.016	0.072	0.869	0.264	0.062	0.108	0.098	0.005	0.042	0.662155	0.014	0.175277	0.052	0.239	0.019	0.141	0.033	0.871	0.005	0.0915526	0.029	0.004	0.04	0.06	5.819	0.014	239.97	318.48	177.39	60	165.78	41.18	159.83	2.96	0.96	2906.12	388.59	171.33	2360.25	274.77	113.93	145.01	256.62
394	HS	1	49	1.43571	0.022	0.493	0.013	0.084	0.797	0.209	0.095	0.086	0.154	0.006	0.054	0.662155	0.004	0.175277	0.075	0.288	0.043	0.142	0.027	1.542	0.003	0.0915526	0.106506	0.009	0.018	0.077	5.829	0.006	134.95	188.02	95.13	60.03	172.54	36.66	79.87	1.58	0.46	1452.34	162.29	82.22	1126.47	162.89	108.25	108.04	198.78
395	HS	2	60	1.43571	0.017	0.431	0.027	0.059	0.753	0.253	0.062	0.033	0.086	0.008	0.056	0.662155	0.004	0.175277	0.056	0.204	0.021	0.156	0.023	2.618	0.003	0.0915526	0.106506	0.004	0.015	0.085	5.898	0.026	105.05	258.28	158.17	74.89	183.73	43.81	113.58	2.11	0.62	2065.1	142.33	82.26	1859.11	198.6	165.88	243.43	305.97
396	HS	2	59	1.43571	0.025	0.383	0.003	0.079	1.034	0.529	0.054	0.049	0.054	0.005	0.046	0.662155	0.00642394	0.234	0.049	0.113	0.022	0.356	0.026	1.638	0.034	0.0915526	0.709	0.063	0.074	0.052	5.555	0.008	60.93	150.41	67.2	73.01	185.48	38.87	50.72	0.92	0.27	922.25	59.71	43.97	794.71	133.89	118.59	116.3	88.94
397	HS	1	62	1.43571	0.037	0.405	0	0.113	0.855	0.278	0.071	0.072	0.103	0.008	0.046	0.662155	0.005	0.254	0.055	0.284	0.016	0.144	0.019	1.06	0.004	0.0915526	0.106506	0.007	0.016	0.038	5.821	0.013	113.67	279.87	184.02	66.45	175.75	36.3	126.2	2.77	0.72	2294.73	161.84	106.48	2048.89	230.44	236.42	318.56	422.65
398	HS	1	62	1.43571	0.016	0.534	0.007	0.14	0.754	0.261	0.067	0.054	0.092	0.01	0.044	0.662155	0.015	0.175277	0.099	0.219	0.009	0.187	0.018	1.551	0.003	0.0915526	0.106506	0.008	0.021	0.105	6.011	0.011	185.95	272.84	165.64	57.58	159.99	39.02	127.53	2.88	0.8	2318.87	270.87	104.19	1941.55	166.34	136.27	217.35	327.41
399	HS	2	73	1.43571	0.023	0.311	0.006	0.08	0.785	0.284	0.066	0.03	0.075	0.009	0.06	0.662155	0.008	0.175277	0.063	0.155	0.029	0.149	0.026	1.481	0.003	0.041	0.036	0.032	0.017	0.065	5.34	0.018	134.5	267.93	155.89	74.31	186.57	43.04	110.54	2.1	0.59	2009.89	169.19	106.68	1767.51	256.45	231.04	277.48	316.73
400	HS	2	71	1.43571	0.009	0.414	0.015	0.072	0.931	0.303	0.078	0.054	0.09	0.007	0.059	0.662155	0.009	0.175277	0.088	0.244	0.021	0.209	0.029	0.81	0.003	0.0915526	0.033	0.008	0.018	0.044	5.587	0.016	118.32	181.97	89.6	68.74	182.45	35.76	73.29	1.3	0.4	1332.69	140.42	43.94	1097.73	127.38	96.94	106.62	138.46
401	HS	1	59	1.43571	0.015	0.53	0.018	0.109	0.764	0.256	0.088	0.071	0.097	0.008	0.044	0.662155	0.012	0.175277	0.072	0.278	0.022	0.169	0.026	1.005	0.001	0.0915526	0.043	0.0235242	0.03	0.1	5.767	0.007	255.13	284.49	142.34	54.99	162.04	35.52	133.63	2.59	0.82	2429.74	349.22	156.92	1841.05	205.87	32.19	84.81	264.81
402	HS	2	67	1.43571	0.012	0.441	0.054	0.048	0.759	0.479	0.062	0.051	0.112	0.007	0.05	0.662155	0.007	0.175277	0.062	0.223	0.052	0.117	0.026	1.821	0.002	0.0915526	0.057	0.0235242	0.02	0.111	5.813	0.012	137.2	244.42	145.78	65.89	181.31	37.17	111.59	2.21	0.62	2028.98	187.67	96.72	1746.4	230.02	160.48	223.16	334.01
403	HS	2	70	1.43571	0.007	0.344	0.033	0.07	0.746	0.316	0.072	0.036	0.086	0.006	0.053	0.662155	0.005	0.175277	0.05	0.212	0.029	0.164	0.017	2.285	0.005	0.0915526	0.046	0.0235242	0.018	0.066	5.172	0.014	85.98	277.85	171.43	82.3	197.42	41.83	118.08	2.08	0.6	2147.02	97.19	106.53	1984.02	320.69	260.53	323.61	341.91
404	HS	1	73	1.43571	0.006	0.361	0.019	0.093	0.764	0.226	0.072	0.046	0.087	0.008	0.051	0.662155	0.005	0.175277	0.069	0.149	0.028	0.119	0.031	2.266	0.012	0.0915526	0.177	0.044	0.028	0.083	5.58	0.02	123.57	253.12	151.19	62.51	176.78	36.62	119.5	2.42	0.68	2172.9	195.45	121.5	1819.33	220.62	152.41	216.65	333.28
405	HS	2	71	1.43571	0.023	0.439	0.045	0.096	0.826	0.305	0.081	0.06	0.106	0.007	0.06	0.662155	0.008	0.175277	0.081	0.247	0.017	0.136	0.021	1.22	0.004	0.0915526	0.049	0.013	0.044	0.074	5.75	0.012	132.78	267.73	142.68	90.89	225.57	46.97	102.23	1.57	0.45	1858.88	159.39	108.19	1553.57	257.58	207.55	228.31	258.49
406	DN2PD	1	80	1.43571	0.032	0.407	0	0.1	0.963	0.319	0.076	0.04	0.106	0.007	0.064	0.662155	0.00642394	0.16	0.049	0.244	0.027	0.129	0.032	1.67	0.002	0.0915526	0.028	0.006	0.026	0.066	5.312	0.016	81.73	198.68	111.06	62.49	160.36	39.56	78.54	1.78	0.49	1428.1	105.96	61.9	1295.83	184.57	164.15	199.45	207.16
407	DN2PD	2	70	1.43571	0.012	0.472	0.007	0.088	0.792	0.373	0.069	0.054	0.083	0.007	0.049	0.662155	0.006	0.286	0.057	0.236	0.059	0.14	0.031	1.808	0.006	0.0915526	0.091	0.0235242	0.03	0.075	5.501	0.013	118.61	298.73	197.3	67.57	172.55	38.54	134.33	2.92	0.78	2442.44	148.09	116.02	2190.43	292.88	271.43	359.8	426.27
408	DN2PD	2	65	1.43571	0.019	0.468	0.016	0.059	0.92	0.301	0.075	0.04	0.065	0.005	0.036	0.662155	0.003	0.175277	0.065	0.163	0.023	0.2	0.023	1.386	0.003	0.0915526	0.066	0.014	0.02	0.055	5.41	0.006	98.23	305.91	181.12	99.03	206.87	43.26	118.19	1.83	0.57	2149.04	142.93	120.26	1861.43	334.38	352.26	300.09	218.83
409	DN2PD	2	60	1.43571	0.004	0.369	0.006	0.066	0.766	0.261	0.077	0.034	0.099	0.005	0.045	0.662155	0.004	0.175277	0.063	0.171	0.019	0.225	0.023	1.884	0.031	0.0915526	0.571	0.179	0.054	0.122	5.461	0.008	147.16	254.2	115.55	90.88	231.31	54.6	96.54	1.27	0.42	1755.38	165.87	132.94	1497.34	186.81	23.67	158.25	306.35
410	DN2PD	2	59	1.43571	0.07	0.408	0.01	0.067	0.783	0.272	0.065	0.052	0.081	0.007	0.034	0.662155	0.001	0.16	0.057	0.2	0.03	0.145	0.024	1.308	0.003	0.0915526	0.044	0.007	0.016	0.085	5.611	0.013	70.87	253.06	142.28	89.67	207.79	44.98	96.1	1.59	0.46	1747.28	52.64	64.97	1649.45	290.48	245.41	261.72	222.59
411	DN2PD	2	84	1.43571	0.019	0.399	0.034	0.047	0.811	0.37	0.047	0.048	0.106	0.005	0.061	0.662155	0.008	0.175277	0.057	0.239	0.018	0.142	0.029	1.444	0.002	0.0915526	0.065	0.0235242	0.03	0.042	5.154	0.01	137.34	230.06	128.06	62.89	182.03	37.89	111.14	2.04	0.61	2020.79	204.85	103.79	1662.09	219.68	137.75	153.94	253.1
412	DN2PD	2	59	1.43571	0.014	0.385	0.017	0.086	0.771	0.246	0.085	0.048	0.077	0.006	0.047	0.662155	0.008	0.169	0.066	0.255	0.019	0.213	0.022	1.381	0.004	0.0915526	0.111	0.0235242	0.04	0.049	5.882	0.006	96.68	243.4	127.59	90.51	197.35	37.94	85.16	1.41	0.43	1548.38	118.26	76.39	1412.94	233.64	232.93	225.32	182.55
413	DN2PD	2	70	1.43571	0.005	0.492	0.033	0.113	0.698	0.285	0.058	0.057	0.153	0.009	0.084	0.662155	0.00642394	0.175277	0.087	0.304	0.017	0.19	0.023	2.472	0.003	0.0915526	0.047	0.01	0.016	0.076	5.313	0.016	181.51	224.77	94.23	88.53	195.51	45.29	86	1.06	0.44	1563.62	220.07	130.77	1150.74	226.87	95.65	66.18	77.3
414	DN2PD	1	66	1.43571	0.002	0.609	0.017	0.065	0.749	0.234	0.063	0.067	0.114	0.005	0.06	0.662155	0.005	0.175277	0.086	0.245	0.021	0.174	0.028	2.226	0.003	0.0915526	0.106506	0.001	0.02	0.153	6.162	0.011	169.42	256.22	155.26	58.88	168.81	40.54	125.93	2.64	0.75	2289.73	244.34	128.57	1913.87	190.62	136.8	184.91	348.49
415	DN2PD	2	71	1.43571	0.012	0.452	0.031	0.091	0.754	0.368	0.066	0.059	0.108	0.006	0.063	0.662155	0.008	0.175277	0.063	0.274	0.026	0.142	0.022	2.268	0.005	0.0915526	0.098	0.0235242	0.033	0.073	7.379	0.015	175.79	269.17	169.28	44.84	137.45	31.57	137.32	3.78	1	2496.86	218.93	125.57	2130.3	236.15	143.24	205.7	340.99
416	DN2PD	2	51	1.43571	0.018	0.4	0.044	0.063	0.697	0.523	0.064	0.051	0.1	0.00570588	0.052	0.662155	0.006	0.26	0.042	0.241	0.027	0.123	0.02	1.367	0.006	0.0915526	0.096	0.022	0.051	0.067	5.336	0.009	82.92	177.95	77.11	75.88	185.84	42.55	59.48	1.02	0.32	1081.59	110.04	64.45	883.45	137.96	92.11	90.97	115.4
417	DN2PD	2	52	1.43571	0.028	0.422	0.009	0.083	0.721	0.306	0.081	0.053	0.08	0.007	0.051	0.662155	0.004	0.235	0.064	0.193	0.02	0.121	0.025	1.266	0.003	0.0915526	0.043	0.006	0.017	0.041	5.414	0.008	79.64	262.56	158.33	84.66	195.32	42.31	102.38	1.87	0.52	1861.57	86.75	65.06	1710.14	263.66	259.35	278.69	270.53
418	DN2PD	2	66	1.43571	0.013	0.471	0.033	0.089	0.755	0.311	0.09	0.074	0.091	0.007	0.074	0.662155	0.005	0.175277	0.067	0.277	0.028	0.171	0.026	1.865	0.005	0.0915526	0.106506	0.004	0.017	0.049	8.01	0.014	144.76	239.92	142.63	56.85	154.48	35.08	112.81	2.51	0.73	2051.13	205.11	111.45	1679.1	208.23	141.07	159.95	268.61
419	DN2PD	1	69	1.43571	0.027	0.434	0.008	0.097	0.827	0.264	0.074	0.065	0.122	0.007	0.076	0.662155	0.004	0.175277	0.066	0.238	0.029	0.161	0.029	2.795	0.00471947	0.0915526	0.126	0.042	0.041	0.069	5.547	0.009	85.81	180.95	76.25	83.18	195.13	37.91	61.87	0.92	0.32	1125.05	112.75	50.18	889.89	145.91	100.62	75.96	96.63
420	DN2PD	1	68	1.43571	0.008	0.41	0.033	0.093	0.856	0.284	0.071	0.068	0.118	0.005	0.07	0.662155	0.016	0.175277	0.063	0.226	0.02	0.119	0.028	2.079	0.004	0.0915526	0.106506	0.008	0.035	0.072	5.553	0.014	210.03	245.42	132.3	57.97	174.69	39.38	115.07	2.28	0.66	2092.25	294.35	128.22	1628.85	176.46	96.52	134.73	289.96
421	DN2PD	1	58	1.43571	0.033	0.354	0.032	0.094	0.776	0.201	0.075	0.059	0.169	0.011	0.063	0.662155	0.007	0.175277	0.057	0.317	0.026	0.119	0.021	1.028	0.008	0.0915526	0.137	0.181	0.074	0.075	5.432	0.011	118.28	142.96	63.04	54.71	153.8	30.4	59.85	1.15	0.39	1088.29	171.91	73.1	776.06	109.42	66.79	43.41	133.39
422	DN2PD	2	69	1.43571	0.001	0.377	0.061	0.05	0.724	0.534	0.068	0.04	0.117	0.005	0.049	0.662155	0.00642394	0.175277	0.058	0.254	0.044	0.126	0.03	1.573	0.001	0.0915526	0.109	0.062	0.033	0.075	5.741	0.017	118.24	263.58	174.1	53.82	147.39	33.08	130.93	3.23	0.89	2380.68	190.88	144.46	2031	214.27	168.68	246.32	406.1
423	DN2PD	2	66	1.43571	0.014	0.592	0.005	0.057	0.875	0.354	0.063	0.058	0.106	0.006	0.07	0.662155	0.009	0.175277	0.058	0.242	0.025	0.184	0.031	2.265	0.003	0.0915526	0.068	0.0235242	0.02	0.123	5.779	0.009	132.93	218.95	130.14	50.02	145.23	33.61	99.72	2.6	0.69	1813.16	179.18	87.84	1528.15	198.28	116.86	202.55	306.94
424	DN2PD	2	76	1.43571	0.001	0.434	0.02	0.086	0.673	0.247	0.058	0.054	0.085	0.005	0.064	0.662155	0.00642394	0.175277	0.062	0.237	0.021	0.156	0.024	2.441	0.004	0.0915526	0.036	0.008	0.018	0.095	5.511	0.012	58.42	292.59	177.48	99.49	215.08	47.53	110.23	1.78	0.51	2004.31	25.34	44.71	1950.51	276.05	283.96	309.04	248.19
425	DN2PD	2	69	1.43571	0.019	0.499	0.034	0.075	0.583	0.272	0.072	0.075	0.146	0.011	0.095	0.662155	0.004	0.175277	0.063	0.253	0.014	0.12	0.034	2.119	0.003	0.0915526	0.049	0.01	0.012	0.107	5.819	0.006	76.84	201.75	121.78	61.95	168.32	40.03	87.41	1.97	0.52	1589.36	83.59	58.72	1397.17	107.04	87.65	149.3	290.96
426	DN2PD	1	55	1.43571	0.016	0.481	0.034	0.105	0.812	0.258	0.076	0.058	0.103	0.007	0.062	0.662155	0.00642394	0.175277	0.071	0.233	0.012	0.135	0.037	1.566	0.003	0.0915526	0.057	0.008	0.023	0.124	7.553	0.01	122.28	237.75	147.97	66.11	177.69	41.78	110.26	2.24	0.62	2004.86	166.27	113.2	1702	171.73	151.71	205.23	309.63
427	DN2PD	2	74	1.43571	0.019	0.502	0.041	0.08	0.704	0.304	0.069	0.069	0.139	0.00570588	0.067	0.662155	0.00642394	0.175277	0.075	0.241	0.011	0.163	0.034	2.363	0.00471947	0.0915526	0.188	0.033	0.047	0.152	7.914	0.013	114.06	258.99	136.16	98.97	241.68	51.36	97.81	1.38	0.4	1778.44	104.62	92.82	1555.06	215.38	147.28	201.74	273.06
428	DN2PD	1	73	1.43571	0.019	0.394	0.017	0.096	0.808	0.247	0.074	0.063	0.096	0.008	0.06	0.662155	0.009	0.175277	0.048	0.278	0.04	0.175	0.032	1.701	0.02	0.0915526	0.375	0.084	0.044	0.081	8.635	0.015	151.96	212.03	128.18	53.37	146.65	30.27	102.99	2.4	0.7	1872.67	185.88	82.76	1564.21	152.14	110.29	155.21	244.95
429	DN2PD	1	55	1.43571	0.003	0.503	0.016	0.086	0.935	0.311	0.083	0.065	0.156	0.01	0.063	0.662155	0.01	0.175277	0.075	0.273	0.008	0.091	0.025	2.143	0.004	0.0915526	0.106506	0.009	0.018	0.063	5.293	0.009	201.72	324.49	195.38	70.59	202.74	49.54	151.54	2.77	0.75	2755.47	212.95	142.49	2377.87	274.94	120.78	226.54	425.72
430	DN2PD	1	70	1.43571	0.028	0.623	0.009	0.103	0.796	0.3	0.068	0.064	0.126	0.009	0.069	0.662155	0.014	0.175277	0.057	0.309	0.021	0.209	0.027	2.175	0.003	0.0915526	0.026	0.007	0.047	0.164	6.644	0.02	172.1	222.08	146.42	42.26	133.97	31.19	120.03	3.46	0.9	2182.49	225.83	72.46	1893.66	122.52	115.84	175.13	294.29
431	DN2PD	1	72	1.43571	0.049	0.535	0.004	0.085	0.617	0.177	0.061	0.05	0.191	0.01	0.08	0.662155	0.00642394	0.175277	0.062	0.341	0.01	0.181	0.028	2.755	0.016	0.032	0.316	0.052	0.076	0.104	7.375	0.013	68.6	156.38	73.94	55.24	137.29	39.53	69.76	1.34	0.51	1268.43	106.52	81.21	1085.32	195.37	133.63	101.8	46.79
432	DN2PD	1	58	1.43571	0.023	0.497	0.021	0.113	0.744	0.302	0.071	0.057	0.147	0.007	0.066	0.662155	0.004	0.175277	0.057	0.238	0.0310346	0.156	0.045	2.258	0.004	0.0915526	0.106506	0.005	0.039	0.07	5.362	0.008	128.89	222.2	112.03	79.57	204.27	46.77	81.3	1.41	0.4	1478.16	192.59	111.26	1162.62	117.04	112.68	126.43	227.1
433	DN2PD	1	59	1.43571	0.009	0.495	0.014	0.087	0.726	0.262	0.06	0.065	0.122	0.006	0.052	0.662155	0.016	0.175277	0.055	0.213	0.019	0.171	0.034	1.411	0.003	0.0915526	0.042	0.008	0.048	0.112	6.192	0.006	172.82	204.91	101.3	62.13	184.08	43.78	95.61	1.63	0.52	1738.5	215.3	57.64	1360.58	153.02	24.87	81.82	206.21
434	DN2PD	1	73	1.43571	0.008	0.408	0.009	0.129	0.802	0.295	0.086	0.065	0.125	0.006	0.078	0.662155	0.00642394	0.176	0.067	0.242	0.023	0.125	0.024	1.723	0.006	0.0915526	0.093	0.023	0.038	0.052	6.119	0.017	76.9	249.4	139.03	88.9	204.37	45.33	98.62	1.56	0.48	1793.18	67.02	62.69	1676.11	213.77	129.06	196.94	264.95
435	DN2PD	2	67	1.43571	0.024	0.625	0.042	0.054	0.747	0.393	0.065	0.056	0.12	0.008	0.064	0.662155	0.007	0.175277	0.081	0.235	0.015	0.156	0.024	1.889	0.002	0.0915526	0.037	0.006	0.012	0.096	5.308	0.009	146.84	225.6	120.02	72.57	192.95	38.4	95.55	1.65	0.5	1737.4	173.72	79.77	1425.24	199.39	115.88	155.54	243.12
436	DN2PD	1	52	1.43571	0.013	0.5	0.008	0.086	0.916	0.316	0.085	0.08	0.105	0.009	0.076	0.662155	0.006	0.175277	0.063	0.267	0.036	0.168	0.024	2.361	0.004	0.0915526	0.106506	0.007	0.018	0.078	4.645	0.008	153.85	250.46	140.19	62.07	177.07	42.86	110.46	2.26	0.62	2008.54	208.67	116.79	1624.97	253.91	154.51	197.94	295.83
437	DN2PD	2	41	1.43571	0.011	0.554	0.014	0.059	0.818	0.294	0.084	0.046	0.09	0.00570588	0.054	0.662155	0.005	0.195	0.061	0.223	0.015	0.201	0.023	1.959	0.004	0.0915526	0.106506	0.005	0.016	0.067	5.336	0.008	58.91	252.2	139.33	96.36	222.25	50.15	86.71	1.45	0.39	1576.59	49.75	77.33	1468.29	253.12	229.4	244.59	226.89
438	DN2PD	1	44	1.43571	0.003	0.419	0.029	0.086	0.766	0.222	0.063	0.09	0.118	0.009	0.073	0.662155	0.011	0.175277	0.067	0.279	0.011	0.196	0.028	2.025	0.003	0.0915526	0.041	0.012	0.039	0.102	5.241	0.012	243.42	232.94	130.77	39.92	131.56	30.67	124.64	3.28	0.95	2266.31	326.4	140.02	1824.53	177.6	94.78	87.98	205.42
439	DN2PD	1	62	1.43571	0.003	0.455	0.006	0.077	0.757	0.218	0.074	0.076	0.152	0.01	0.064	0.662155	0.00642394	0.175277	0.07	0.274	0.019	0.169	0.032	2.169	0.005	0.0915526	0.047	0.012	0.031	0.099	5.261	0.028	139.72	242.41	146.9	57.4	164.74	38.36	114.16	2.56	0.69	2075.66	189.65	144.57	1730.9	217.76	131.5	190.58	346.23
440	DN2PD	1	78	1.43571	0.008	0.308	0.009	0.102	0.901	0.246	0.056	0.041	0.083	0.009	0.065	0.662155	0.00642394	0.245	0.061	0.246	0.037	0.141	0.022	1.273	0.01	0.015	0.12	0.0235242	0.047	0.052	7.102	0.017	111.18	229.64	140.45	49.66	137.98	26.29	114.22	2.83	0.83	2076.79	203.92	121.89	1722.06	169.79	136.01	173.61	290.44
441	DN2PD	1	62	1.43571	0.015	0.593	0.011	0.112	0.871	0.308	0.076	0.061	0.149	0.007	0.079	0.662155	0.005	0.208	0.045	0.259	0.01	0.181	0.035	1.893	0.003	0.0915526	0.106506	0.008	0.025	0.051	5.32	0.009	96.9	217.17	118.06	74.45	181.88	40.34	86.63	1.59	0.48	1575.14	163.75	98.83	1300.28	121.65	130.06	140.02	208.06
442	DN2PD	2	50	1.43571	0.022	0.728	0.041	0.089	0.694	0.282	0.147	0.073	0.118	0.007	0.061	0.662155	0.01	0.466	0.072	0.226	0.015	0.109	0.028	2.055	0.003	0.0915526	0.106506	0.004	0.019	0.104	5.189	0.007	162.28	261.78	125.95	95.58	239.63	44.09	92.24	1.32	0.38	1677.1	163.82	54.25	1416.6	234.26	208.22	225.47	222.33
443	DN2PD	1	70	1.43571	0.033	0.293	0.071	0.094	0.893	0.347	0.058	0.083	0.124	0.01	0.056	0.662155	0.007	0.175277	0.057	0.256	0.018	0.186	0.038	2.254	0.021	0.021	0.306	0.221	0.069	0.08	5.059	0.018	124.93	124.01	61.45	28.6	105.99	24.53	60.44	2.15	0.57	1098.91	241.9	95.28	744.4	108.33	121.73	96.02	150.56
444	DN2PD	1	82	1.43571	0.047	0.441	0	0.143	0.874	0.221	0.11	0.092	0.157	0.012	0.072	0.662155	0.003	0.175277	0.059	0.299	0.011	0.246	0.033	1.417	0.002	0.023	0.089	0.017	0.055	0.031	5.726	0.032	121.26	125.77	42.87	43.59	136.58	27.16	53.67	0.98	0.39	975.81	187.01	94.48	589	173.55	68.94	13.22	58.81
445	DN2PD	1	55	1.43571	0.007	0.32	0.029	0.066	0.755	0.266	0.083	0.07	0.112	0.006	0.054	0.662155	0.015	0.175277	0.059	0.204	0.02	0.17606	0.028	1.128	0.012	0.0915526	0.257	0.146	0.045	0.048	5.707	0.006	139.78	218.12	146.61	45.7	134.22	31.76	113.53	3.21	0.85	2064.26	205.88	63.91	1743.05	68.52	109.12	189.09	306.79
446	DN2PD	1	55	1.43571	0.002	0.511	0.02	0.102	0.78	0.326	0.067	0.0551088	0.094	0.008	0.058	0.662155	0.016	0.175277	0.051	0.245	0.016	0.168	0.028	1.199	0.003	0.0915526	0.106506	0.006	0.043	0.064	5.306	0.01	272.78	263.4	129.5	49.77	157.06	35.56	124.25	2.6	0.79	2259.29	400.69	100.67	1696.57	124.86	34.78	56.8	193.89
447	DN2PD	1	72	1.43571	0.022	0.553	0.012	0.076	0.94	0.258	0.093	0.067	0.16	0.00570588	0.062	0.662155	0.006	0.175277	0.062	0.263	0.022	0.13	0.028	1.826	0.003	0.0915526	0.039	0.0235242	0.028	0.078	10.197	0.017	93.81	173.4	93.07	54.99	146.49	31.71	67.12	1.69	0.46	1220.39	95.58	31.82	1070.86	116.76	101.8	124	180.52
448	DN2PD	1	65	1.43571	0.017	0.462	0.014	0.084	0.811	0.283	0.074	0.057	0.107	0.009	0.073	0.662155	0.009	0.175277	0.077	0.288	0.025	0.137	0.029	2.09	0.00471947	0.0915526	0.106	0.048	0.038	0.065	5.283	0.012	111.83	197.92	92.82	82.48	196.4	45.02	76.18	1.13	0.39	1385.12	130.06	70.27	1140.77	154.9	98.04	92.91	131.3
449	DN2PD	1	68	1.43571	0.016	0.497	0.006	0.096	0.766	0.215	0.123	0.054	0.092	0.006	0.06	0.662155	0.01	0.175277	0.057	0.264	0.022	0.177	0.031	1.391	0.002	0.01	0.046	0.006	0.016	0.096	6.077	0.017	121.29	177.94	109.28	42.84	134	27.7	90.2	2.55	0.67	1640.04	153.53	31.39	1406.57	119.49	81.42	144.64	237.58
450	DN2PD	2	48	1.43571	0.001	0.53	0.03	0.069	0.753	0.335	0.174	0.042	0.088	0.00570588	0.06	0.662155	0.015	0.175277	0.045	0.231	0.031	0.106	0.029	1.963	0.004	0.0915526	0.019	0.01	0.059	0.097	5.126	0.013	236.04	273.37	153.31	60.32	171.71	37.03	130.49	2.54	0.76	2372.68	289.55	85.39	1960.66	283.53	132.42	215.38	316.22
451	DN2PD	1	60	1.43571	0.011	0.376	0	0.104	0.886	0.284	0.085	0.081	0.146	0.006	0.056	0.662155	0.006	0.229	0.069	0.3	0.024	0.145	0.029	1.485	0.001	0.0915526	0.112	0.018	0.029	0.044	5.73	0.011	78.04	157.44	86.39	56.07	142.51	31.11	65.05	1.54	0.46	1182.71	119.99	50.02	1030.39	115.97	132.98	128.94	143.98
452	DN2PD	1	70	1.43571	0.012	0.325	0.016	0.083	0.652	0.256	0.047	0.042	0.09	0.006	0.061	0.662155	0.007	0.175277	0.056	0.239	0.048	0.144	0.022	1.072	0.009	0.0915526	0.186	0.1	0.046	0.072	5.565	0.019	123.85	230.74	130.01	61.08	163.58	33.22	103.74	2.13	0.63	1886.22	203.16	96.78	1506.39	191.08	118.4	186.48	288.26
453	DN2PD	1	55	1.43571	0.054	0.373	0.005	0.083	0.975	0.312	0.096	0.067	0.108	0.007	0.079	0.662155	0.004	0.175277	0.049	0.246	0.017	0.205	0.017	1.612	0.012	0.0915526	0.196	0.022	0.062	0.052	5.42	0.006	94.25	210.38	91.64	95.51	224.38	44.01	65.21	0.96	0.29	1185.75	100.14	67.34	1010.46	192.35	144.7	146.96	136.57
454	DN2PD	2	73	1.43571	0.023	0.435	0.022	0.12	0.809	0.297	0.086	0.052	0.127	0.01	0.082	0.662155	0.00642394	0.175277	0.068	0.291	0.013	0.215	0.035	1.231	0.006	0.0915526	0.128	0.015	0.02	0.068	6.01	0.012	72.1	193.22	108.54	62.2	167.97	33.07	77.47	1.74	0.46	1408.57	81.33	63.34	1249.38	181.51	153.84	178.7	195.32
455	DN2PD	1	69	1.43571	0.009	0.423	0.006	0.106	0.812	0.274	0.09	0.046	0.085	0.006	0.066	0.662155	0.005	0.175277	0.07	0.229	0.019	0.254	0.031	1.811	0.002	0.0915526	0.091	0.0235242	0.036	0.087	8.039	0.046	131.3	178.53	95.81	52.78	145.61	31.75	82.59	1.82	0.57	1501.66	200.74	77.47	1177.69	143.64	111.17	120.91	164.96
456	DN2PD	2	58	1.43571	0.029	0.333	0.029	0.069	0.742	0.5	0.078	0.025	0.077	0.006	0.044	0.662155	0.005	0.147	0.064	0.19	0.058	0.122	0.024	1.55	0.001	0.0915526	0.042	0.017	0.02	0.062	5.728	0.014	66.59	219.01	123.35	82.2	188.09	36.39	84.55	1.5	0.45	1537.33	65.23	22.76	1429.51	186.61	181.03	205.94	192.94
457	DN2PD	2	70	1.43571	0.006	0.417	0.04	0.091	0.848	0.28	0.083	0.058	0.153	0.007	0.067	0.662155	0.005	0.175277	0.068	0.28	0.017	0.101	0.023	0.896	0.002	0.0915526	0.087	0.0235242	0.053	0.06	6.261	0.01	136.75	285.47	177.48	76.67	194.64	41.95	123.21	2.31	0.63	2240.32	145.65	92.32	1945.41	251.64	223.52	275.47	350.74
458	DN2PD	1	59	1.43571	0.001	0.547	0.021	0.105	0.875	0.284	0.074	0.064	0.133	0.007	0.052	0.662155	0.01	0.175277	0.059	0.29	0.02	0.193	0.041	2.382	0.004	0.0915526	0.106506	0.008	0.052	0.122	5.325	0.009	138.49	233.47	153.71	48.23	153.74	34.42	121.59	3.19	0.79	2210.83	198.4	100.68	1925.23	95.47	91.42	168.89	352.16
459	DN2PD	1	78	1.43571	0.037	0.51	0	0.116	0.904	0.305	0.085	0.064	0.11	0.012	0.061	0.662155	0.006	0.18	0.07	0.303	0.035	0.172	0.035	2.495	0.005	0.0915526	0.05	0.016	0.04	0.071	7.415	0.022	89.76	241.08	148.42	65.44	168.18	35.31	101.2	2.27	0.6	1840.03	118.88	81.26	1671.57	233.97	221.2	282.87	302.93
460	DN2PD	1	50	1.43571	0.007	0.481	0.001	0.098	0.869	0.298	0.079	0.066	0.104	0.005	0.044	0.662155	0.021	0.175277	0.049	0.21	0.021	0.155	0.042	1.97	0.003	0.0915526	0.057	0.02	0.04	0.064	5.406	0.01	216.26	241.48	113.43	59.22	171.58	42.81	105.49	1.92	0.61	1918.04	275.76	95.62	1454.83	236.17	7.34	104.96	221.2
461	DN2PD	1	65	1.43571	0.006	0.383	0.01	0.093	0.785	0.253	0.069	0.058	0.114	0.005	0.055	0.662155	0.008	0.175277	0.057	0.323	0.029	0.158	0.031	1.086	0.00471947	0.0915526	0.086	0.042	0.061	0.048	5.611	0.01	152.65	266.27	172.22	49.83	146.74	31.3	136.9	3.46	0.93	2489.2	218.84	118.4	2147.51	220.09	170.91	222.77	359.3
462	DN2PD	1	78	1.43571	0.03	0.403	0.016	0.098	0.836	0.305	0.078	0.066	0.102	0.007	0.047	0.662155	0.004	0.058	0.06	0.254	0.015	0.155	0.013	1.846	0.006	0.014	0.062	0.019	0.018	0.057	6.183	0.012	49.15	194.74	107.56	74.49	168.12	34	72.58	1.44	0.43	1319.61	42.52	46.98	1251.91	199.18	186.17	160.36	110.56
463	DN2PD	2	71	1.43571	0.024	0.379	0.017	0.085	0.795	0.247	0.077	0.061	0.085	0.008	0.053	0.662155	0.007	0.175277	0.066	0.267	0.017	0.222	0.026	2.246	0.007	0.0915526	0.124	0.044	0.029	0.079	6.985	0.006	125.49	213.22	116.79	61.93	144.43	35.32	88.11	1.89	0.61	1602.05	146.27	82.79	1342.52	208.7	158.37	170.31	157.07
464	DN2PD	2	51	1.43571	0.007	0.434	0.034	0.052	0.784	0.414	0.058	0.044	0.103	0.006	0.049	0.662155	0.001	0.292	0.059	0.17	0.015	0.136	0.035	1.424	0.003	0.0915526	0.106506	0.007	0.011	0.078	5.259	0.01	134.2	237.02	137.29	61.99	168.87	36.81	101.61	2.21	0.6	1847.47	235.69	98.89	1480.33	169.84	189.28	211.4	277.86
465	DN2PD	1	81	1.43571	0.029	0.475	0.006	0.114	0.847	0.316	0.076	0.064	0.129	0.008	0.075	0.662155	0.007	0.278	0.066	0.328	0.022	0.168	0.02	1.988	0.003	0.0915526	0.041	0.022	0.031	0.054	4.764	0.014	109.52	248.07	135.36	83.78	190.32	39.7	93.8	1.62	0.49	1705.47	159.29	65.63	1473.97	205.14	203.04	212.67	184.43
466	DN2PD	2	69	1.43571	0.007	0.542	0.013	0.058	0.857	0.533	0.08	0.047	0.082	0.008	0.063	0.662155	0.003	0.222	0.052	0.213	0.017	0.188	0.026	1.577	0.001	0.0915526	0.039	0.003	0.031	0.065	5.828	0.015	137.61	244.3	153.85	50.63	139.22	32.14	115.76	3.04	0.83	2104.92	200.59	115.96	1792.45	274.22	208.74	268.52	317.97
467	DN2PD	2	54	1.43571	0.023	0.365	0.036	0.076	0.828	0.285	0.085	0.051	0.11	0.007	0.061	0.662155	0.004	0.183	0.069	0.291	0.011	0.197	0.035	1.117	0.002	0.0915526	0.043	0.009	0.019	0.045	5.172	0.005	78.56	213.6	114.44	78.77	182.92	37.97	80.46	1.45	0.44	1463.03	98.88	76.5	1279.39	225.04	197.86	184.22	178.73
468	DN2PD	1	75	1.43571	0.026	0.579	0.004	0.107	0.882	0.215	0.086	0.059	0.103	0.009	0.056	0.662155	0.00642394	0.175277	0.081	0.274	0.019	0.172	0.031	1.443	0.005	0.0915526	0.06	0.008	0.027	0.107	5.883	0.029	169.61	257.84	148.28	54.7	154.06	36.01	118.99	2.71	0.77	2163.56	218.24	143.22	1752.56	212.92	142.52	150.89	231.5
469	DN2PD	2	76	1.43571	0.007	0.342	0.022	0.099	0.747	0.271	0.071	0.039	0.096	0.005	0.071	0.662155	0.00642394	0.175277	0.07	0.238	0.081	0.09	0.025	1.541	0.001	0.0915526	0.067	0.023	0.027	0.07	5.542	0.016	119.69	259.3	159.64	62.15	161.64	35.2	112.11	2.57	0.69	2038.47	158.08	98.24	1767.34	291.22	234.7	289.91	334.05
470	DN2PD	1	57	1.43571	0.009	0.509	0.002	0.063	0.8	0.301	0.082	0.079	0.089	0.006	0.037	0.662155	0.005	0.175277	0.055	0.247	0.021	0.146	0.024	2.21	0.004	0.0915526	0.106506	0.005	0.028	0.102	5.279	0.014	120.16	245.3	142.59	54.43	164.95	41.03	107.78	2.62	0.65	1959.64	180.26	126.2	1604.67	193.42	114.12	153.23	303.51
471	DN2PD	2	69	1.43571	0.005	0.338	0.014	0.069	0.845	0.368	0.071	0.05	0.1	0.008	0.058	0.662155	0.00642394	0.14	0.065	0.226	0.017	0.175	0.024	1.293	0.005	0.0915526	0.044	0.014	0.035	0.05	4.689	0.011	66.9	237.03	133.96	83.98	194.65	39.93	91.43	1.6	0.47	1662.46	66.83	75.35	1506.7	281.74	241.75	236.03	187.65
472	DN2PD	1	66	1.43571	0.019	0.456	0.004	0.081	0.853	0.266	0.071	0.066	0.153	0.006	0.069	0.662155	0.005	0.194	0.064	0.245	0.018	0.156	0.034	1.098	0.001	0.0915526	0.023	0.008	0.026	0.059	5.559	0.012	71.29	190.82	111.35	65.28	161.99	36.22	77.52	1.71	0.48	1409.53	88.58	49.7	1258.82	146.81	155.5	173.65	196.4
473	DN2PD	2	68	1.43571	0.015	0.349	0.042	0.082	0.785	0.266	0.06	0.058	0.092	0.01	0.059	0.662155	0.005	0.175277	0.058	0.215	0.024	0.162	0.032	1.919	0.002	0.0915526	0.082	0.041	0.036	0.103	5.521	0.014	112.32	296.3	180.83	78.88	192.72	40.94	131.83	2.29	0.68	2397.04	141.26	124.32	2107.8	316.65	225.69	292.73	356.89
474	DN2PD	1	69	1.43571	0.021	0.434	0.011	0.086	0.81	0.231	0.086	0.055	0.169	0.008	0.065	0.662155	0.008	0.175277	0.061	0.344	0.026	0.186	0.028	2.156	0.001	0.0915526	0.071	0.008	0.033	0.108	5.775	0.017	90.27	180.93	93.97	62.09	162.97	36.39	71.36	1.51	0.44	1297.49	120.56	53.12	1082.52	145.08	111.64	124.65	152.75
475	DN2PD	2	65	1.43571	0.026	0.589	0.065	0.071	0.896	0.326	0.078	0.05	0.103	0.01	0.04	0.662155	0.009	0.175277	0.058	0.268	0.01	0.158	0.019	2.632	0.005	0.0915526	0.068	0.011	0.032	0.164	10.093	0.007	245.28	222.51	93.1	77.63	226.76	55.8	99.94	1.2	0.44	1817.23	301.67	135.3	1330.69	136.09	0	2.17	197
476	DN2PD	2	74	1.43571	0.054	0.509	0.016	0.086	0.809	0.294	0.104	0.068	0.077	0.01	0.054	0.662155	0.002	0.083	0.083	0.244	0.018	0.232	0.019	1.746	0.003	0.014	0.106506	0.01	0.033	0.082	7.284	0.015	68.08	173.47	94.46	61.32	147.06	29.93	77.88	1.54	0.53	1415.99	85.1	83.65	1257.67	238.36	156.95	161.02	163.27
477	DN2PD	1	68	1.43571	0.003	0.393	0.033	0.065	0.852	0.436	0.076	0.08	0.122	0.007	0.067	0.662155	0.00642394	0.175277	0.047	0.226	0.026	0.128	0.028	1.686	0.005	0.0915526	0.142	0.0235242	0.041	0.05	5.567	0.01	162.74	279.72	156.76	63	177.04	38.32	124.27	2.49	0.7	2259.5	252.02	120.14	1827.72	227.7	109.54	202.46	328.75
478	DN2PD	1	71	1.43571	0.005	0.434	0.004	0.094	0.757	0.226	0.163	0.049	0.09	0.002	0.058	0.662155	0.01	0.175277	0.055	0.206	0.021	0.135	0.026	1.711	0.004	0.0915526	0.132	0.012	0.018	0.087	6.476	0.008	138.59	222.27	134.27	59.17	155.15	34.65	103.67	2.27	0.67	1884.98	184.89	93.63	1597.99	141.18	129.76	148.53	238.54
479	DN2PD	1	77	1.43571	0.001	0.481	0	0.099	0.769	0.289	0.186	0.052	0.16	0.002	0.097	0.662155	0.00642394	0.175277	0.066	0.279	0.032	0.17606	0.027	2.056	0.008	0.0915526	0.093	0.014	0.023	0.086	6.211	0.015	82.69	198.94	117.51	63.81	161.21	35.7	79.74	1.84	0.49	1449.82	129.23	61.86	1257.37	81.82	144.44	155.32	224.71
480	DN2PD	2	74	1.43571	0.081	0.51	0.026	0.072	0.873	0.363	0.167	0.054	0.131	0.003	0.049	0.662155	0.003	0.175277	0.093	0.245	0.026	0.175	0.037	1.434	0.00471947	0.01	0.174	0.071	0.109	0.101	6.617	0.013	97.51	178.49	70.7	82.27	188.95	34.09	62.37	0.86	0.33	1133.98	122.53	56.24	899.4	175.84	120.94	66.24	30.89
481	DN2PD	1	46	1.43571	0.021	0.435	0	0.059	0.946	0.345	0.19	0.052	0.096	0.001	0.047	0.662155	0.004	0.175277	0.065	0.271	0.037	0.17606	0.022	1.382	0.002	0.0915526	0.043	0.013	0.023	0.059	5.623	0.009	45.86	141.32	70.24	57.21	130.92	31.63	47.86	1.23	0.37	870.19	60.42	31.39	805.93	116.52	141.93	107.36	65.26
482	DN2PD	2	79	1.43571	0.039	0.491	0.036	0.126	0.779	0.335	0.072	0.082	0.116	0.00570588	0.044	0.662155	0.007	0.175277	0.056	0.301	0.03	0.146	0.035	2.677	0.007	0.0915526	0.082	0.03	0.047	0.125	9.138	0.031	108.47	163.51	70.18	64.1	164.6	36.04	67.61	1.09	0.41	1229.3	178.37	85.84	902.91	143.02	71.24	31.76	69.13
483	DN2PD	2	61	1.43571	0.005	0.387	0.017	0.077	0.688	0.27	0.179	0.032	0.099	0.001	0.041	0.662155	0.005	0.175277	0.083	0.226	0.039	0.134	0.025	1.337	0.012	0.0915526	0.278	0.046	0.042	0.035	5.495	0.009	106.57	268.69	154.57	80.44	191.7	45.72	111.28	1.92	0.58	2023.38	132.82	112.92	1757.89	274.26	201.85	210.27	242.38
484	DN2PD	1	67	1.43571	0.011	0.415	0	0.092	0.776	0.339	0.153	0.047	0.166	0.002	0.075	0.662155	0.014	0.175277	0.069	0.332	0.062	0.123	0.03	1.729	0.00471947	0.0915526	0.11	0.033	0.051	0.11	5.624	0.01	133.24	200.6	128.09	46.22	130.41	32.86	97.25	2.77	0.75	1768.32	206.43	56.84	1474.93	138.09	180.56	182.28	212.61
485	DN2PD	2	76	1.43571	0.028	0.445	0.033	0.059	0.795	0.388	0.109	0.049	0.072	0.001	0.058	0.662155	0.00642394	0.175277	0.064	0.181	0.047	0.138	0.039	1.861	0.001	0.0915526	0.086	0.011	0.027	0.04	5.555	0.013	78.42	224.3	125.99	77.02	180.4	32.42	87.47	1.64	0.48	1590.53	96.88	46.19	1448.89	197.69	219.6	220.15	185.87
486	DN2PD	2	81	1.43571	0.023	0.493	0.011	0.105	0.937	0.494	0.132	0.038	0.055	0.001	0.052	0.662155	0.004	0.175277	0.05	0.176	0.024	0.162	0.018	2.248	0.005	0.0915526	0.053	0.008	0.017	0.138	6.781	0.026	210.01	326.37	161.5	80.34	201.68	37.04	138.74	2.01	0.69	2522.73	345.83	233.62	1899.03	494.16	270.36	245.87	236.23
487	DN2PD	2	57	1.43571	0.028	0.45	0.019	0.063	0.821	0.335	0.2	0.061	0.107	0.001	0.06	0.662155	0.001	0.175277	0.068	0.211	0.035	0.128	0.029	1.813	0.005	0.0915526	0.09	0.004	0.035	0.076	5.791	0.013	78.67	222.22	129.74	70.95	180.42	42.3	89.98	1.83	0.5	1636.11	110.21	63.12	1398.07	165.68	163.81	171.02	230.87
488	DN2PD	1	57	1.43571	0.014	0.377	0.008	0.079	0.819	0.222	0.187	0.052	0.143	0.002	0.052	0.662155	0.017	0.175277	0.072	0.306	0.026	0.17606	0.028	1.581	0.005	0.0915526	0.108	0.015	0.065	0.066	6.911	0.011	153.87	192.19	110.98	39.83	130.37	32.63	86.64	2.79	0.66	1575.37	163.48	64	1353.73	107.64	80.93	103.25	196.18
489	DN2PD	2	61	1.43571	0.014	0.353	0.041	0.062	0.746	0.287	0.179	0.038	0.088	0.004	0.054	0.662155	0.006	0.175277	0.07	0.199	0.02	0.069	0.034	1.481	0.003	0.0915526	0.065	0.016	0.023	0.074	5.464	0.023	81.33	285.2	181.21	82.87	188.72	38.28	122.88	2.19	0.65	2234.31	74.75	72.93	2071.99	291.86	284.38	295.74	283.45
490	DN2PD	2	77	1.43571	0.01	0.495	0.04	0.065	0.793	0.416	0.127	0.032	0.09	0.00570588	0.069	0.662155	0.008	0.175277	0.064	0.235	0.022	0.121	0.028	1.774	0.004	0.0915526	0.106506	0.004	0.015	0.092	5.722	0.013	117.72	252.06	147.97	70.21	178.07	40.73	110.55	2.11	0.62	2010.08	142.84	105.42	1770.11	247.75	184.51	210.34	272.39
491	DN2PD	1	81	1.43571	0.019	0.536	0.005	0.103	0.76	0.279	0.203	0.072	0.086	0.001	0.047	0.662155	0.003	0.175277	0.059	0.221	0.041	0.113	0.03	1.764	0.00471947	0.0915526	0.075	0.009	0.036	0.1	5.911	0.025	159.93	179.44	88.4	42.62	124.47	31.16	87.92	2.07	0.71	1598.62	269.16	114.73	1198.4	176.12	151.05	93.77	120.56
492	DN2PD	2	72	1.43571	0.031	0.504	0	0.071	0.822	0.363	0.205	0.041	0.135	0	0.058	0.662155	0.005	0.175277	0.06	0.252	0.039	0.17606	0.023	1.609	0.003	0.0915526	0.106506	0.009	0.012	0.065	5.208	0.01	108.47	228.83	124.3	75.91	175.92	39.18	93.21	1.64	0.53	1694.86	190.77	96.38	1374.35	172.8	189.37	141.53	168.25
493	DN2PD	2	64	1.43571	0.026	0.332	0.025	0.081	0.774	0.513	0.092	0.037	0.102	0.002	0.037	0.662155	0.007	0.175277	0.055	0.198	0.038	0.17606	0.033	1.472	0.013	0.0915526	0.243	0.049	0.041	0.044	5.186	0.023	78.02	240.16	129.33	85.67	206.25	39.49	84.64	1.51	0.41	1538.97	72.89	65.8	1363.06	241.04	208.74	227.75	236.92
494	DN2PD	1	81	1.43571	0.007	0.348	0.004	0.1	0.846	0.232	0.154	0.074	0.11	0.002	0.066	0.662155	0.005	0.175277	0.046	0.263	0.05	0.124	0.033	1.547	0.015	0.0915526	0.13	0.091	0.067	0.056	5.242	0.031	122.04	283.32	201.09	45.79	122.29	27.82	153.8	4.39	1.26	2796.45	187.88	136.43	2496.67	270.02	231.05	304.24	407.23
495	DN2PD	1	57	1.43571	0.007	0.46	0.003	0.086	0.673	0.218	0.181	0.039	0.105	0.00570588	0.06	0.662155	0.00642394	0.175277	0.111	0.191	0.023	0.152	0.032	2.017	0.006	0.0915526	0.07	0.034	0.025	0.116	6.249	0.008	166.48	238.15	140.13	56.67	159.35	42.08	107.58	2.47	0.68	1956.12	181.52	105.7	1692.82	148.55	57.8	184.49	359.8
496	DN2PD	1	74	1.43571	0.012	0.508	0	0.152	0.781	0.292	0.224	0.058	0.14	0.003	0.085	0.662155	0.00642394	0.175277	0.073	0.35	0.04	0.167	0.021	1.342	0.001	0.0915526	0.071	0.023	0.023	0.107	5.799	0.023	215.67	219.56	126.01	39.63	118.96	25.6	113.23	3.18	0.95	2058.83	223.29	106.25	1723.76	193.99	108	78	144.09
497	DN2PD	2	75	1.43571	0.014	0.32	0.02	0.137	0.695	0.354	0.093	0.038	0.085	0.003	0.045	0.662155	0.008	0.175277	0.046	0.176	0.033	0.149	0.028	1.152	0.004	0.0915526	0.102	0.03	0.06	0.063	6.3	0.041	75.71	230.7	135.02	77.08	174.62	38.22	90.98	1.75	0.52	1654.3	88.89	57.7	1507.6	227.83	239.43	229.33	184.43
498	DN2PD	2	61	1.43571	0.016	0.433	0.022	0.074	0.685	0.265	0.17	0.054	0.115	0.001	0.048	0.662155	0.005	0.175277	0.067	0.275	0.041	0.17606	0.023	1.559	0.003	0.0915526	0.106506	0.008	0.019	0.086	5.76	0.014	123.86	293.35	184.54	63.77	168.02	38.13	135.23	2.89	0.8	2458.91	172	101.25	2122.81	260.56	188.67	236.44	335.4
499	DN2PD	1	59	1.43571	0.021	0.419	0.005	0.093	0.74	0.231	0.149	0.063	0.169	0.002	0.062	0.662155	0.00642394	0.175277	0.108	0.315	0.023	0.15	0.028	1.428	0.00471947	0.0915526	0.138	0.0235242	0.026	0.091	16.002	0.017	211.29	256.32	153.49	48.89	141.24	34.04	127.15	3.14	0.9	2311.88	235.98	138.12	1916.21	194.14	125.08	137.75	249.54
500	DN2PD	1	87	1.43571	0.022	0.457	0	0.133	0.85	0.382	0.158	0.034	0.103	0.003	0.056	0.662155	0.003	0.175277	0.055	0.259	0.048	0.156	0.035	1.409	0.002	0.0915526	0.114	0.008	0.019	0.092	6.245	0.032	106.99	168.1	83.09	58.94	150.88	30.37	74.18	1.41	0.49	1348.84	195.22	108.76	1043.19	192.7	151.81	130.29	148.18
501	DN2PD	2	69	1.43571	0.019	0.287	0.007	0.099	0.701	0.24	0.171	0.036	0.086	0.002	0.053	0.662155	0.006	0.175277	0.06	0.202	0.06	0.124	0.016	0.879	0.016	0.0915526	0.417	0.113	0.069	0.049	5.445	0.014	83.43	270.75	173.62	76.05	186.39	40.59	120.89	2.28	0.65	2198.17	74.9	68.36	2023.12	263.69	221.42	277.9	334.22
502	DN2PD	1	53	1.43571	0	0.587	0.012	0.087	0.74	0.233	0.179	0.053	0.111	0.001	0.083	0.662155	0.008	0.175277	0.088	0.251	0.036	0.093	0.028	2.419	0.005	0.0915526	0.106506	0.004	0.018	0.087	5.465	0.012	133.68	282.85	178.12	57.41	151.76	37.03	132.85	3.1	0.88	2415.59	193.95	116.8	2063.14	213.99	172.56	201.02	318.92
503	DN2PD	1	76	1.43571	0.015	0.587	0.007	0.1	0.687	0.188	0.217	0.094	0.194	0.002	0.05	0.662155	0.012	0.175277	0.089	0.36	0.045	0.119	0.022	2.171	0.016	0.0915526	0.283	0.0235242	0.033	0.129	7.982	0.027	243.75	191.13	84.37	53.9	157.23	35.82	88.79	1.57	0.56	1614.45	287.09	92.13	1136.96	145.66	51.21	0	59.88
504	DN2PD	1	53	1.43571	0.031	0.479	0.002	0.082	0.878	0.403	0.167	0.042	0.112	0.003	0.078	0.662155	0.003	0.175277	0.05	0.251	0.025	0.142	0.02	1.472	0.002	0.0915526	0.071	0.019	0.025	0.047	5.697	0.007	59.55	168.56	86.98	67.39	157.77	35.11	63.63	1.29	0.4	1157.03	85.49	44.7	1017.74	116.84	114.17	109.04	119.56
505	DN2PD	2	60	1.43571	0.026	0.423	0	0.055	0.884	0.272	0.187	0.028	0.069	0.00570588	0.057	0.662155	0.004	0.175277	0.064	0.166	0.034	0.078	0.027	1.574	0.00471947	0.0915526	0.034	0.007	0.02	0.058	5.33	0.015	53.03	222.88	111.33	102.94	209.05	42.95	72.33	1.08	0.35	1315.22	47.25	24.74	1251.68	177.1	194.71	145.78	46.89
506	DN2PD	1	64	1.43571	0.023	0.425	0.027	0.114	0.618	0.185	0.131	0.088	0.169	0.002	0.061	0.662155	0.00642394	0.175277	0.079	0.34	0.073	0.145	0.04	2.11	0.017	0.0915526	0.346	0.121	0.072	0.144	12.706	0.01	243.19	201.86	103.02	46.37	141.4	31.07	94.84	2.22	0.67	1724.4	254.81	67.07	1318.08	150.74	78.17	32.82	70.89
507	DN2PD	1	77	1.43571	0	0.468	0.001	0.127	0.795	0.257	0.203	0.0551088	0.1	0.001	0.065	0.662155	0.02	0.175277	0.082	0.234	0.032	0.17606	0.018	2.881	0.005	0.0915526	0.049	0.016	0.062	0.139	5.852	0.015	227.33	305.62	184.94	52.74	149.93	31.35	160.17	3.51	1.07	2912.29	350.85	133.15	2392.87	258.04	191.64	160.73	252.38
508	DN2PD	1	49	1.43571	0.004	0.368	0.007	0.085	0.789	0.271	0.104886	0.075	0.098	0.002	0.057	0.662155	0.00642394	0.175277	0.052	0.264	0.029	0.261	0.031	1.137	0.00471947	0.0915526	0.062	0.016	0.031	0.063	5.735	0.013	179.57	165.16	87.99	41.4	112.06	27.94	87.19	2.13	0.78	1585.29	312.55	106.32	1202.57	123.67	160.77	53.43	58.83
509	DN2PD	2	62	1.43571	0.009	0.399	0.021	0.078	0.734	0.299	0.153	0.031	0.092	0.001	0.051	0.662155	0.006	0.175277	0.079	0.178	0.022	0.114	0.024	1.164	0.002	0.0915526	0.068	0.011	0.022	0.047	4.797	0.014	131.98	265.94	147.34	73.14	186.87	42.77	115.26	2.01	0.62	2095.77	189.65	121.78	1739.3	308.21	198.56	201.14	245.7
510	DN2PD	2	71	1.43571	0.02	0.481	0.014	0.127	0.738	0.386	0.156	0.065	0.104	0.004	0.054	0.662155	0.011	0.175277	0.06	0.268	0.066	0.239	0.026	1.344	0.006	0.0915526	0.12	0.025	0.087	0.078	8.611	0.023	222.45	165.53	59.62	56.21	146.83	30.34	79.61	1.06	0.54	1447.55	362.72	121.17	916.73	203.64	90.93	8.73	33.92
511	DN2PD	2	74	1.43571	0.031	0.464	0.027	0.046	0.724	0.343	0.189	0.037	0.086	0.001	0.069	0.662155	0.007	0.175277	0.073	0.192	0.032	0.11	0.028	1.865	0.004	0.0915526	0.106	0.02	0.032	0.117	5.619	0.014	85.81	239.81	131.48	86	185.66	42.12	97.86	1.53	0.53	1779.3	117.65	82.26	1596.42	207.37	196.97	172.73	126.4
512	DN2PD	2	50	1.43571	0.014	0.534	0.038	0.051	0.833	0.304	0.202	0.048	0.112	0.001	0.098	0.662155	0.007	0.175277	0.06	0.202	0.0310346	0.096	0.017	1.769	0.004	0.0915526	0.106506	0.006	0.019	0.135	5.838	0.011	45.02	246.39	148.78	88.27	195.97	46.1	92.88	1.69	0.47	1688.83	31.84	28.5	1606.9	186.26	216.22	210.32	186.21
513	DN2PD	1	80	1.43571	0.033	0.522	0.028	0.111	0.721	0.335	0.187	0.108	0.19	0.003	0.081	0.662155	0.01	0.175277	0.068	0.374	0.028	0.117	0.027	2.141	0.021	0.0915526	0.315	0.0235242	0.063	0.064	10.426	0.03	98.63	206.33	127.23	57.93	140.54	34.29	102.45	2.2	0.73	1862.87	156.93	128.42	1579.18	195.6	220.62	120.97	111.74
514	DN2PD	1	57	1.43571	0.055	0.326	0.029	0.086	0.833	0.279	0.173	0.06	0.117	0.006	0.048	0.662155	0.006	0.175277	0.069	0.235	0.033	0.101	0.02	1.209	0.004	0.0915526	0.113	0.031	0.04	0.061	6.111	0.008	118.03	183.82	103.7	56.99	163.01	39.07	85.09	1.82	0.52	1547.11	178.22	80.41	1231.39	111.06	95.74	103.27	239.28
515	DN2PD	2	76	1.43571	0.002	0.528	0.03	0.072	0.681	0.241	0.215	0.103	0.091	0.001	0.061	0.662155	0.022	0.175277	0.096	0.261	0.018	0.166	0.039	1.444	0.00471947	0.0915526	0.106506	0.009	0.051	0.108	7.858	0.016	385.67	253.03	113.98	48	148.67	28.64	112.53	2.37	0.76	2046.19	410.26	118.01	1535.77	181.58	129.4	38.16	47.3
516	DN2PD	2	54	1.43571	0.047	0.516	0.038	0.101	0.849	0.543	0.122	0.071	0.116	0.001	0.071	0.662155	0.006	0.175277	0.069	0.227	0.032	0.121	0.03	2.133	0.002	0.0915526	0.106506	0.0235242	0.024	0.108	7.844	0.013	85.3	232.09	122.59	95.35	203.27	39.36	84.08	1.29	0.41	1528.88	93.18	37.02	1382.83	202.77	252.64	165.13	82.28
517	DN2PD	1	56	1.43571	0.006	0.571	0.011	0.098	0.794	0.38	0.104	0.031	0.107	0.00570588	0.071	0.662155	0.01	0.175277	0.065	0.238	0.023	0.109	0.028	2.254	0.002	0.0915526	0.042	0.01	0.023	0.092	6.291	0.013	119.37	249.42	154.32	67.51	180.06	44.01	110.84	2.29	0.62	2015.46	147.49	68.28	1773.64	149.79	132.05	190.49	311.28
518	DN2PD	2	77	1.43571	0.009	0.47	0.01	0.077	0.765	0.319	0.171	0.044	0.081	0.001	0.061	0.662155	0.003	0.175277	0.088	0.223	0.023	0.109	0.036	1.519	0.004	0.0915526	0.106506	0.004	0.027	0.07	5.613	0.013	77.04	307.77	203.49	88.05	197.34	42.34	132.43	2.31	0.67	2407.96	88.28	93.22	2279.48	300.02	355.39	363.15	321.76
519	DN2PD	2	72	1.43571	0.002	0.488	0.003	0.055	0.82	0.286	0.18	0.069	0.107	0.003	0.046	0.662155	0.01	0.175277	0.084	0.296	0.039	0.173	0.031	1.453	0.005	0.0915526	0.094	0.021	0.026	0.06	6.316	0.02	235.29	253.76	137.46	43.74	126.06	26.45	124.68	3.14	0.99	2267.03	306.86	133.8	1769.86	274.84	166.32	108.48	120.73
520	DN2PD	2	50	1.43571	0.002	0.53	0.031	0.082	0.576	0.275	0.152	0.049	0.1	0.00570588	0.068	0.662155	0.009	0.175277	0.061	0.264	0.051	0.19	0.025	2.123	0.00471947	0.0915526	0.106506	0.009	0.016	0.18	5.475	0.02	177.07	203.37	99.04	58.25	157.19	33.36	90.31	1.7	0.57	1641.99	227.77	103.63	1264.71	216.76	126.1	91.07	105.91
521	DN2PD	1	77	1.43571	0.047	0.67	0	0.147	0.79	0.229	0.199	0.075	0.153	0.002	0.068	0.662155	0.012	0.175277	0.071	0.369	0.024	0.17606	0.026	2.471	0.005	0.008	0.037	0.0235242	0.033	0.136	9.075	0.009	109.25	109.87	51.33	42.51	117.2	26.96	44.79	1.21	0.38	814.45	152.52	35.53	574.78	67.67	118.46	26.07	1.11
522	DN2PD	2	76	1.43571	0.069	0.414	0.04	0.071	0.76	0.486	0.172	0.022	0.068	0.001	0.041	0.662155	0.007	0.175277	0.063	0.194	0.018	0.17606	0.032	1.495	0.004	0.0915526	0.121	0.016	0.03	0.076	5.506	0.014	74.73	226.49	93.54	109.45	225.91	44	68.26	0.85	0.3	1241.22	71.73	58.5	1185.45	210.58	161.86	113.13	0
523	DN2PD	1	50	1.43571	0.012	0.494	0.006	0.096	0.842	0.312	0.228	0.058	0.195	0.001	0.069	0.662155	0.009	0.175277	0.069	0.305	0.034	0.17606	0.028	1.39	0.003	0.0915526	0.073	0.019	0.035	0.085	5.838	0.01	97.46	169.18	90.18	46.48	141.09	33.46	72.43	1.94	0.51	1316.98	144.98	60.54	1026.52	110.34	79.72	85.42	169.25
524	DN2PD	1	78	1.43571	0.013	0.41	0.013	0.091	0.74	0.276	0.166	0.059	0.1	0.003	0.063	0.662155	0.022	0.175277	0.079	0.271	0.049	0.122	0.03	1.099	0.00471947	0.0915526	0.131	0.033	0.054	0.054	7.315	0.036	218.76	211.77	104.34	50.86	157.94	34.05	98.05	2.05	0.62	1782.88	264.51	70.17	1366.83	139.53	32.52	58.06	172.47
525	DN2PD	1	73	1.43571	0.004	0.45	0.012	0.091	0.752	0.228	0.155	0.051	0.157	0.001	0.063	0.662155	0.004	0.175277	0.066	0.313	0.055	0.132	0.039	1.398	0.016	0.0915526	0.286	0.042	0.04	0.086	6.535	0.016	114.54	242.23	164.6	57.93	149.48	35.23	118.98	2.84	0.8	2163.36	161.22	101.93	1917.36	170.83	228.27	252.49	330.88
526	DN2PD	2	71	1.43571	0.002	0.383	0.042	0.055	0.689	0.306	0.136	0.071	0.127	0.001	0.063	0.662155	0.007	0.175277	0.075	0.241	0.023	0.122	0.029	1.164	0.002	0.0915526	0.106506	0.012	0.01	0.055	7.966	0.013	232.7	280.31	162.63	50.85	152.03	35.77	135.19	3.2	0.89	2458.03	275.81	151.58	2057.49	217.22	118.01	164.05	322.2
527	DN2PD	1	78	1.43571	0.013	0.414	0	0.082	0.845	0.341	0.204	0.052	0.088	0.001	0.098	0.662155	0.002	0.175277	0.083	0.275	0.04	0.17606	0.029	1.596	0.024	0.0915526	0.273	0.052	0.109	0.054	6.55	0.014	65.66	193.72	92.13	82.74	206.41	39.02	66.3	1.11	0.32	1205.55	74.18	58.26	1032.4	162.17	139.5	130.34	137.34
528	DN2PD	2	74	1.43571	0.008	0.434	0.031	0.064	0.747	0.424	0.191	0.022	0.107	0.001	0.052	0.662155	0.004	0.175277	0.064	0.221	0.027	0.17606	0.033	1.103	0.002	0.0915526	0.106506	0.0235242	0.024	0.09	5.21	0.022	79.04	214.54	120.25	74.19	190.99	38.59	87.06	1.62	0.46	1583.02	103.54	55.19	1368.21	197.21	157.06	158.48	205.54
529	DN2PD	2	73	1.43571	0.034	0.552	0.004	0.071	0.9	0.29	0.216	0.038	0.108	0.001	0.054	0.662155	0.007	0.175277	0.065	0.215	0.031	0.17606	0.021	1.52	0.003	0.0915526	0.106506	0.002	0.024	0.038	6.159	0.013	82.45	235.48	137.89	86.02	199.05	42.9	91.88	1.6	0.46	1670.67	112.09	54.12	1437.64	149.91	197.18	187.94	214.81
530	DN2PD	1	56	1.43571	0.019	0.599	0.002	0.113	0.801	0.325	0.211	0.063	0.127	0	0.064	0.662155	0.006	0.175277	0.061	0.301	0.031	0.148	0.018	2.116	0.003	0.0915526	0.053	0.0235242	0.04	0.041	10.679	0.006	87.57	143.85	64.64	53.33	135.24	33.85	55.86	1.21	0.41	1015.74	140.56	71.69	744.24	110.15	105.2	34.01	58.16
531	DN2PD	2	53	1.43571	0.016	0.363	0.006	0.086	0.735	0.456	0.18	0.037	0.104	0.00570588	0.052	0.662155	0.004	0.175277	0.05	0.161	0.019	0.136	0.034	1.322	0.007	0.0915526	0.056	0.014	0.043	0.079	5.755	0.01	101.17	245.12	130.98	91.21	205.67	45.98	94.93	1.44	0.46	1726.17	121.04	82.38	1530.58	219.95	213.65	189.11	153.4
532	DN2PD	1	67	1.43571	0.021	0.537	0.008	0.076	0.881	0.29	0.218	0.057	0.115	0.001	0.084	0.662155	0.009	0.175277	0.083	0.294	0.042	0.179	0.031	2.182	0.003	0.0915526	0.106506	0.008	0.058	0.115	5.638	0.011	106.98	173.11	99.91	48.97	135.59	32.77	75.82	2.04	0.56	1378.59	146.84	52.16	1141.72	119.08	140.33	113.08	131.66
533	DN2PD	2	80	1.43571	0.031	0.391	0.074	0.084	0.872	0.55	0.167	0.064	0.109	0.003	0.07	0.662155	0.005	0.175277	0.053	0.228	0.036	0.167	0.039	2.185	0.003	0.012	0.091	0.007	0.036	0.105	11.335	0.027	145.53	121.61	22.33	40.57	142.75	29.46	48.95	0.55	0.34	890.08	234.12	130.13	405.19	279.19	77.6	18.36	14.36
534	DN2PD	2	59	1.43571	0.016	0.588	0.012	0.08	0.86	0.312	0.243	0.056	0.126	0.001	0.074	0.662155	0.005	0.175277	0.063	0.267	0.022	0.117	0.029	1.621	0.005	0.0915526	0.084	0.005	0.012	0.05	5.09	0.014	194.17	358.64	211.28	95.24	227.07	54.49	144.46	2.22	0.64	2626.6	241.97	138.04	2214.84	320.46	300.56	310.04	347.82
535	DN2PD	2	74	1.43571	0.049	0.427	0.032	0.066	0.777	0.346	0.104886	0.044	0.121	0.001	0.046	0.662155	0.004	0.175277	0.06	0.267	0.073	0.115	0.021	1.389	0.01	0.0915526	0.131	0.042	0.044	0.086	10.454	0.019	73.49	185.98	90.5	74.33	172.37	34.16	75.99	1.22	0.44	1381.74	96.89	95.94	1128.71	269.92	166.14	129.8	117.36
536	DN2PD	2	75	1.43571	0.035	0.53	0.004	0.057	0.859	0.351	0.211	0.048	0.103	0.001	0.052	0.662155	0.003	0.175277	0.08	0.212	0.034	0.125	0.033	1.422	0.004	0.0915526	0.106506	0.007	0.034	0.099	5.762	0.011	49.46	180.38	90.81	75.91	169.5	36.52	59.27	1.2	0.35	1077.74	56.61	19.94	1013.78	146.71	174.45	136.44	75.25
537	DN2PD	1	71	1.43571	0.02	0.449	0.003	0.098	1.042	0.334	0.234	0.059	0.159	0.002	0.051	0.662155	0.00642394	0.175277	0.07	0.262	0.051	0.17606	0.031	1.61	0.028	0.0915526	0.448	0.112	0.092	0.105	6.265	0.016	79.87	176.66	107.01	47.55	136.07	31.73	81.32	2.25	0.6	1478.7	124.83	94.23	1233.51	158.03	159.77	151.27	201.66
538	DN2PD	2	70	1.43571	0.001	0.508	0	0.076	0.801	0.263	0.206	0.0551088	0.14	0.00570588	0.08	0.662155	0.005	0.175277	0.086	0.229	0.018	0.198	0.026	1.636	0.003	0.0915526	0.106506	0.0235242	0.025	0.059	5.506	0.017	181.4	245.55	139.83	65.4	185.77	42.4	107.45	2.14	0.58	1953.76	225.05	97.27	1565.81	162.24	131.45	149.71	281.32
539	DN2PD	1	46	1.43571	0.015	0.553	0.004	0.071	0.613	0.33	0.104886	0.057	0.109	0.001	0.067	0.662155	0.011	0.175277	0.072	0.321	0.035	0.149	0.018	1.366	0.004	0.0915526	0.099	0.007	0.033	0.099	9.91	0.008	258.58	289.27	167.36	40.25	115.64	31.27	145.23	4.16	1.26	2640.7	333.34	139.4	2188.56	264.03	168.6	121.3	160.71
540	DN2PD	1	68	1.43571	0.012	0.381	0.021	0.094	0.757	0.248	0.183	0.042	0.115	0.001	0.065	0.662155	0.003	0.175277	0.079	0.307	0.038	0.189	0.022	1.544	0.016	0.0915526	0.255	0.065	0.105	0.114	6.321	0.012	51.59	214.1	140.31	55.88	142.6	34.08	95.26	2.51	0.67	1732.09	61.05	69.18	1566.24	164.31	156.5	198.6	273.42
541	DN2PD	2	73	1.43571	0.015	0.665	0.006	0.111	0.721	0.34	0.2	0.053	0.139	0.001	0.064	0.662155	0.00642394	0.175277	0.072	0.28	0.058	0.141	0.02	1.821	0.01	0.0915526	0.114	0.0235242	0.031	0.095	9.818	0.016	113.85	309.53	190.23	69.69	176.52	41.37	139.11	2.73	0.79	2529.32	153.4	137.81	2189.04	359.97	252.53	265.52	317.51
542	DN2PD	1	50	1.43571	0.029	0.237	0.025	0.081	0.653	0.27	0.189	0.06	0.135	0.002	0.065	0.662155	0.005	0.175277	0.053	0.278	0.051	0.137	0.024	0.904	0.026	0.0915526	0.48	0.178	0.09	0.062	6.676	0.018	91.32	174.67	103.33	51.82	142.04	33.52	80.84	1.99	0.57	1469.9	140.8	80.58	1212.21	126.62	154.01	131.38	173.55
543	DN2PD	1	64	1.43571	0.006	0.498	0.012	0.095	0.736	0.343	0.18	0.061	0.159	0.001	0.065	0.662155	0.003	0.175277	0.074	0.301	0.05	0.17606	0.03	1.233	0.003	0.0915526	0.038	0.011	0.024	0.101	6.243	0.006	80.93	246.08	160.9	67.35	159.51	33.77	104.17	2.39	0.65	1894.05	91.1	55.29	1758.68	206.13	278.1	283.45	289.19
544	DN2PD	1	51	1.43571	0.036	0.279	0.004	0.073	0.787	0.231	0.223	0.03	0.145	0.001	0.058	0.662155	0.00642394	0.175277	0.067	0.263	0.047	0.17606	0.032	0.899	0.00471947	0.0915526	0.054	0.028	0.021	0.058	6.209	0.015	35.58	101.46	37.22	53.21	127.66	26.54	28.66	0.7	0.22	521.2	45.53	0	410.12	89.88	118.16	44.67	0
545	DN2PD	1	80	1.43571	0.023	0.413	0.044	0.068	0.739	0.18	0.173	0.075	0.166	0.003	0.056	0.662155	0.01	0.175277	0.061	0.286	0.028	0.148	0.018	1.485	0.011	0.0915526	0.118	0.0235242	0.032	0.076	12.658	0.016	116.61	157.47	87.5	50.53	147.41	33.01	70.64	1.73	0.48	1284.43	138.86	37.77	1075.64	100.16	105.16	96.3	144.02
546	DN2PD	2	75	1.43571	0.016	0.503	0.039	0.066	0.826	0.276	0.174	0.036	0.085	0.001	0.052	0.662155	0.012	0.175277	0.066	0.21	0.037	0.122	0.023	1.506	0.003	0.0915526	0.106506	0.01	0.023	0.109	5.515	0.01	144.51	203.07	113.58	58.18	154.17	36.11	89.1	1.95	0.58	1620.08	190.52	55.43	1346.28	152.35	127.42	142.85	209.73
547	DN2PD	1	72	1.43571	0.026	0.279	0.004	0.062	0.638	0.257	0.082	0.065	0.075	0.00570588	0.04	0.662155	0.00642394	0.175277	0.058	0.208	0.041	0.12	0.036	1.406	0.023	0.0915526	0.399	0.082	0.048	0.099	6.171	0.016	131.27	272.05	193.68	50.07	126.71	27.1	153.56	3.87	1.21	2792.16	207.52	167.84	2519.16	291.35	291.62	328.78	398.02
548	DN2PD	1	66	1.43571	0.028	0.513	0.004	0.065	0.826	0.289	0.192	0.052	0.12	0.002	0.066	0.662155	0.004	0.175277	0.11	0.302	0.032	0.144	0.037	1.658	0.012	0.0915526	0.154	0.057	0.036	0.084	6.769	0.014	90.27	195.93	113.73	53.04	137.92	29.27	85.67	2.14	0.62	1557.76	132.9	84.54	1322.33	216.51	203.42	184.91	191.59
549	DN2PD	2	75	1.43571	0.038	0.35	0	0.056	0.785	0.39	0.114	0.048	0.073	0.00570588	0.036	0.662155	0.004	0.175277	0.054	0.221	0.034	0.124	0.025	1.286	0.016	0.0915526	0.164	0.042	0.058	0.078	5.322	0.014	55.99	226.14	135	77.17	167.87	34.16	95.88	1.75	0.57	1743.3	48.23	57.11	1697.07	218.26	230.06	212.63	136.99
550	DN2PD	2	83	1.43571	0.031	0.573	0.028	0.153	0.682	0.437	0.125	0.055	0.131	0.003	0.065	0.662155	0.00642394	0.175277	0.079	0.314	0.034	0.237	0.048	3.268	0.009	0.0915526	0.159	0.0235242	0.04	0.195	10.798	0.014	127.42	151.25	82.18	39.77	122.78	27.01	70.21	2.07	0.57	1276.56	189.64	83.42	981.66	113.97	112.62	109.12	140.6
551	DN2PD	2	71	1.43571	0.022	0.382	0	0.053	0.946	0.357	0.181	0.043	0.107	0.003	0.047	0.662155	0.003	0.175277	0.067	0.19	0.027	0.139	0.021	1.258	0.001	0.0915526	0.157	0.027	0.038	0.089	5.896	0.019	82.71	166.29	83.16	62.83	164.83	35.63	68.23	1.32	0.41	1240.52	126.52	74.29	1022.21	161.24	150.5	125.16	138.39
552	DN2PD	1	72	1.43571	0.036	0.394	0.005	0.071	0.848	0.252	0.213	0.05	0.112	0.004	0.072	0.662155	0.008	0.175277	0.083	0.307	0.032	0.112	0.036	0.968	0.015	0.0915526	0.319	0.051	0.049	0.058	7.959	0.013	93.15	144.26	64.35	62.56	149.82	34.46	48.87	1.03	0.33	888.59	117.85	25.61	699.55	97.8	132.01	70.92	15.72
553	DN2PD	1	64	1.43571	0.006	0.453	0.005	0.077	0.768	0.31	0.148	0.065	0.122	0.003	0.084	0.662155	0.009	0.175277	0.073	0.254	0.034	0.135	0.055	1.808	0.01	0.0915526	0.177	0.026	0.057	0.073	5.645	0.021	151.51	292.78	199.51	50.35	144.44	34.84	146.88	3.96	1.02	2670.73	225.66	116.05	2333.82	220.35	219.53	280.46	411.82
554	DN2PD	2	63	1.43571	0	0.476	0.049	0.062	0.716	0.372	0.112	0.042	0.083	0.00570588	0.059	0.662155	0.01	0.175277	0.071	0.251	0.0310346	0.17606	0.039	1.488	0.006	0.0915526	0.106506	0.016	0.028	0.073	6.626	0.014	138.88	229.26	150.31	44.56	136.33	31.51	118.32	3.37	0.87	2151.31	196.29	86.68	1844.65	145.27	127.71	176.6	311.12
555	DN2PD	2	70	1.43571	0	0.59	0.007	0.081	0.898	0.348	0.184	0.044	0.167	0.002	0.064	0.662155	0.009	0.175277	0.085	0.26	0.041	0.128	0.039	2.657	0.007	0.0915526	0.025	0.015	0.057	0.118	6.369	0.016	176.85	302.88	192.33	53.49	159.94	41.51	157	3.6	0.98	2854.59	258.49	160.98	2392.29	300.65	169.01	230	412.62
556	DN2PD	2	57	1.43571	0.014	0.408	0.013	0.06	0.706	0.316	0.176	0.033	0.089	0.001	0.074	0.662155	0.00642394	0.175277	0.066	0.19	0.032	0.17606	0.041	1.349	0.003	0.0915526	0.106506	0.008	0.026	0.073	5.197	0.008	114.78	261.16	141.62	91.19	217.74	46.52	95.44	1.55	0.44	1735.38	169.19	66.71	1472.72	202.84	229.95	212.39	224.19
557	DN2PD	1	70	1.43571	0.005	0.453	0	0.061	0.819	0.234	0.107	0.066	0.106	0.00570588	0.063	0.662155	0.003	0.175277	0.06	0.282	0.034	0.17606	0.026	1.387	0.004	0.0915526	0.045	0.021	0.03	0.055	5.419	0.018	87.43	213.97	146.17	40.57	110.21	26.07	107.44	3.6	0.97	1953.57	155.72	84.02	1690.45	102.37	152.95	163.8	256.66
558	DN2PD	2	66	1.43571	0.019	0.368	0.026	0.066	0.774	0.335	0.171	0.034	0.109	0.00570588	0.062	0.662155	0.004	0.175277	0.053	0.183	0.022	0.17606	0.036	1.564	0.008	0.0915526	0.051	0.005	0.025	0.087	5.534	0.009	86.92	207.42	102.83	74.87	185.65	38.82	79.7	1.37	0.43	1449.15	116.44	92.06	1178.06	212.03	123.36	112.96	164.74
559	DN2PD	1	72	1.43571	0.019	0.469	0.002	0.086	0.864	0.328	0.123	0.052	0.102	0.002	0.098	0.662155	0.003	0.175277	0.051	0.234	0.047	0.17606	0.045	1.942	0.002	0.0915526	0.106506	0.0235242	0.051	0.129	6.821	0.024	67.37	243.54	167.82	59.09	154.71	37.92	113.25	2.84	0.73	2059.22	87.28	96.93	1888.54	197.39	226.94	256.01	333.76
560	DN2PD	1	82	1.43571	0.041	0.335	0	0.056	0.784	0.275	0.146	0.061	0.107	0.001	0.046	0.662155	0.004	0.175277	0.077	0.207	0.039	0.171	0.047	1.377	0.016	0.0915526	0.237	0.075	0.087	0.075	5.509	0.011	58.69	245.54	146.97	85.53	190.83	33.93	98.59	1.72	0.52	1792.63	44.85	48.88	1747.31	212.15	232.08	236.88	204.72
561	DN2PD	1	48	1.43571	0.012	0.555	0.003	0.065	0.834	0.327	0.158	0.035	0.148	0.004	0.051	0.662155	0.005	0.175277	0.064	0.262	0.066	0.087	0.039	1.87	0.002	0.0915526	0.035	0.013	0.021	0.111	6.092	0.007	67.42	205.09	105.46	81.18	178.43	35.47	71.48	1.3	0.4	1299.68	90.76	33.12	1133.58	168.83	213.95	134.68	45.03
562	DN2PD	2	78	1.43571	0.003	0.486	0	0.062	0.739	0.391	0.199	0.035	0.095	0.001	0.063	0.662155	0.004	0.175277	0.086	0.207	0.036	0.17606	0.037	1.632	0.008	0.0915526	0.106506	0.008	0.044	0.115	5.32	0.013	58.21	172.92	78.02	76.03	175.16	41.97	54.87	1.03	0.31	997.67	83.29	52.07	857.73	141.98	130.72	86.89	37.01
563	DN2PD	1	78	1.43571	0.009	0.488	0	0.074	0.745	0.205	0.104886	0.057	0.114	0.001	0.074	0.662155	0.007	0.175277	0.072	0.312	0.03	0.17606	0.035	2.012	0.002	0.0915526	0.071	0.007	0.026	0.083	5.83	0.007	67.47	101.43	38.87	40.7	122.72	26.79	40.33	0.96	0.33	733.25	96.35	33.17	522.39	132.68	77.93	23.47	37.75
564	DN2PD	1	57	1.43571	0.001	0.52	0.012	0.104	0.719	0.269	0.185	0.055	0.184	0.001	0.075	0.662155	0.022	0.175277	0.075	0.345	0.04	0.067	0.041	2.063	0.003	0.0915526	0.106506	0.011	0.045	0.1	6.106	0.009	225.52	207.8	110.84	46.22	141.13	30.84	104.73	2.4	0.74	1904.3	265.52	68.65	1530.19	133.24	93.82	66.75	166.21
565	DN2PD	1	77	1.43571	0.006	0.427	0.02	0.08	0.714	0.356	0.089	0.039	0.112	0.001	0.084	0.662155	0.01	0.175277	0.062	0.286	0.041	0.17606	0.04	2.697	0.01	0.0915526	0.058	0.018	0.027	0.121	5.644	0.007	141.77	307.04	196.69	61.09	161.05	37.9	144.6	3.22	0.9	2629.13	179.53	137	2309.73	304.75	192.84	272.36	414
566	DN2PD	1	59	1.43571	0.006	0.356	0	0.06	0.661	0.196	0.159	0.032	0.112	0.002	0.07	0.662155	0.009	0.175277	0.057	0.264	0.049	0.141	0.036	1.758	0.003	0.0915526	0.09	0.023	0.051	0.086	5.211	0.017	149.24	244.43	154.42	59.69	160.92	38.51	113.67	2.59	0.71	2066.89	169.19	50.93	1774.29	150.4	135.85	177.11	265.3
567	DN2PD	1	50	1.43571	0	0.543	0.006	0.125	0.816	0.239	0.104886	0.06	0.138	0.001	0.077	0.662155	0.025	0.175277	0.078	0.321	0.041	0.17606	0.033	1.277	0.005	0.0915526	0.052	0.013	0.063	0.085	5.129	0.01	315.92	183.3	74.86	43.69	120.61	28.21	85.16	1.71	0.71	1548.42	359.93	74.35	1066.58	177	102.27	0	0
568	DN2PD	2	59	1.43571	0.013	0.504	0.02	0.094	0.685	0.329	0.104886	0.045	0.129	0.004	0.052	0.662155	0.008	0.175277	0.062	0.227	0.033	0.106	0.049	1.721	0.002	0.0915526	0.106506	0.005	0.021	0.086	5.988	0.01	109.14	284.32	177.37	89.12	205.78	45.89	125.12	1.99	0.61	2274.98	140.93	73.17	2013.78	202.16	228.39	226.37	290.02
569	DN2PD	2	58	1.43571	0.032	0.442	0.013	0.08	0.77	0.377	0.223	0.043	0.137	0	0.05	0.662155	0.005	0.175277	0.089	0.274	0.032	0.17606	0.053	1.02	0.007	0.0915526	0.106506	0.003	0.017	0.055	6.209	0.012	72.84	253.5	135.7	91.04	206.07	46.07	93.31	1.49	0.45	1696.59	65.84	71.34	1558.41	289.63	222.8	207.64	174.25
570	DN2PD	1	41	1.43571	0.002	0.509	0.026	0.08	0.81	0.275	0.213	0.052	0.138	0.001	0.064	0.662155	0.006	0.175277	0.083	0.285	0.031	0.17606	0.049	2.559	0.005	0.0915526	0.048	0.017	0.026	0.143	5.415	0.013	226.61	328.04	194.81	67.33	180.99	45	152.32	2.89	0.84	2769.65	265.6	167.23	2300.4	223.34	126.25	142.29	334.21
571	DN2PD	2	75	1.43571	0.009	0.413	0.006	0.058	0.777	0.302	0.22	0.038	0.124	0.001	0.058	0.662155	0.005	0.175277	0.073	0.2	0.03	0.17606	0.038	1.893	0.007	0.0915526	0.106506	0.008	0.019	0.101	5.455	0.018	108.43	280.51	163.02	88.39	209.04	48.7	111.68	1.84	0.53	2030.56	121	94.51	1827.08	248	218.14	232.53	254.87
572	DN2PD	2	54	1.43571	0.029	0.375	0.023	0.064	0.756	0.322	0.193	0.029	0.073	0	0.062	0.662155	0.01	0.175277	0.063	0.173	0.019	0.14	0.033	1.514	0.003	0.0915526	0.106506	0.007	0.037	0.043	5.35	0.015	117.55	267.1	133.18	101.37	220.11	40.22	90.66	1.31	0.41	1648.37	142.87	52.9	1401.23	285.55	269.79	220.15	128.53
573	DN2PD	1	64	1.43571	0.024	0.433	0.006	0.122	0.722	0.257	0.219	0.061	0.11	0.001	0.055	0.662155	0.006	0.175277	0.071	0.232	0.031	0.17606	0.046	1.322	0.002	0.0915526	0.106506	0.007	0.037	0.053	5.54	0.011	81.01	251.72	159.58	78.6	185.02	43.18	103.48	2.03	0.56	1881.58	88.97	57.04	1730.09	168.12	251.07	235.16	230.98
574	DN2PD	1	80	1.43571	0.023	0.404	0.008	0.149	0.625	0.332	0.136	0.029	0.079	0.002	0.065	0.662155	0.002	0.175277	0.07	0.207	0.018	0.17606	0.035	1.479	0.00471947	0.0915526	0.069	0.012	0.016	0.099	6.702	0.015	103.31	189.67	113.88	45.24	108.9	25.75	101	2.52	0.93	1836.5	182.02	128.73	1543.59	227.94	169.54	138.68	165.64
575	DN2PD	2	80	1.43571	0.025	0.412	0.048	0.094	0.8	0.371	0.202	0.036	0.11	0.002	0.055	0.662155	0.006	0.175277	0.083	0.269	0.031	0.17606	0.037	1.154	0.004	0.0915526	0.063	0.019	0.025	0.062	5.973	0.016	172.1	235.94	118.76	71.22	178.19	39.43	99.86	1.67	0.56	1815.75	220.9	147.37	1450.59	260.23	138.09	134.41	178.26
576	DN2PD	2	47	1.43571	0.046	0.328	0.011	0.084	0.732	0.266	0.17	0.037	0.107	0.002	0.046	0.662155	0.003	0.175277	0.063	0.268	0.026	0.149	0.027	1.182	0.016	0.0915526	0.25	0.074	0.062	0.053	5.864	0.011	61.98	244.88	145.49	81.01	181.95	40.18	94.32	1.8	0.52	1715	71.49	75.15	1560.96	247.71	252.5	242.24	213.83
577	DN2PD	2	65	1.43571	0.008	0.415	0.022	0.056	0.803	0.418	0.146	0.04	0.118	0.001	0.065	0.662155	0.007	0.175277	0.067	0.292	0.055	0.15	0.041	2.666	0.004	0.0915526	0.076	0.017	0.034	0.099	5.793	0.009	80.67	278.71	187.27	61.71	144.11	36.25	121.08	3.03	0.84	2201.57	97.76	97.29	2028.59	391.1	406.23	391.3	311.38
578	DN2PD	1	56	1.43571	0.03	0.604	0.004	0.132	0.745	0.33	0.114	0.044	0.11	0.003	0.057	0.662155	0.007	0.175277	0.089	0.283	0.023	0.155	0.035	1.904	0.004	0.0915526	0.045	0.015	0.063	0.11	6.017	0.014	130.37	167.7	89.95	50.32	139.05	33.13	76.18	1.79	0.55	1385.18	168.01	80.46	1133.39	106.27	105.07	78.13	135.8
579	DN2PD	1	78	1.43571	0.025	0.478	0.001	0.109	0.926	0.295	0.151	0.058	0.182	0.004	0.056	0.662155	0.004	0.175277	0.056	0.299	0.038	0.198	0.049	1.353	0.004	0.0915526	0.145	0.0235242	0.054	0.047	5.886	0.021	136.3	177.96	92.16	48.94	147.52	35.82	79.21	1.88	0.54	1440.16	239.07	108.39	1036.97	124.42	110.85	73.75	155.61
580	DN2PD	1	74	1.43571	0.037	0.655	0.006	0.11	0.793	0.373	0.182	0.097	0.201	0.003	0.089	0.662155	0.017	0.175277	0.071	0.373	0.0310346	0.17606	0.065	2.072	0.005	0.0915526	0.067	0.006	0.057	0.152	6.668	0.016	293.28	233.97	98.5	65.34	182.14	45.26	109.15	1.51	0.6	1984.6	419.26	125.03	1353.57	118.36	0	0	54.91
581	DN2PD	2	68	1.43571	0.004	0.497	0.023	0.069	0.775	0.262	0.203	0.047	0.115	0.001	0.055	0.662155	0.011	0.175277	0.075	0.259	0.0310346	0.17606	0.034	1.695	0.003	0.0915526	0.106506	0.008	0.014	0.144	5.119	0.009	249.27	342.46	208.54	74.66	212.39	46.66	166.89	2.79	0.79	3034.57	276.84	151.62	2637.73	261.31	150.72	237.84	432.14
582	DN2PD	1	81	1.43571	0.018	0.623	0.013	0.105	0.718	0.305	0.094	0.052	0.106	0.007	0.062	0.662155	0.01	0.175277	0.051	0.224	0.039	0.115	0.045	2.028	0.002	0.0915526	0.106506	0.008	0.052	0.105	6.965	0.014	106.13	184.06	100.24	68.31	166.8	35.6	78.6	1.47	0.47	1429.23	135	30.92	1215.16	143.62	164.07	143.36	135.02
583	DN2PD	1	80	1.43571	0.02	0.428	0.009	0.096	0.859	0.374	0.198	0.045	0.088	0.001	0.066	0.662155	0.00642394	0.175277	0.066	0.301	0.051	0.17606	0.053	1.356	0.00471947	0.0915526	0.136	0.036	0.054	0.063	6.001	2.704	49.28	231.4	130.74	83.46	174.91	36.54	86.13	1.57	0.49	1566.09	47.02	43.43	1501.04	197.21	190.73	187.53	130.36
584	DN2PD	2	36	1.43571	0.015	0.359	0.017	0.081	0.854	0.335	0.224	0.07	0.134	0.001	0.076	0.662155	0.007	0.175277	0.081	0.277	0.032	0.17606	0.066	1.016	0.005	0.0915526	0.047	0.014	0.035	0.057	5.976	0.009	66.46	160.36	95.45	52.8	140.38	36.25	68.62	1.81	0.49	1247.73	96.71	51.16	1045.51	116.62	152.22	114.16	124.41
585	DN2PD	1	68	1.43571	0.02	0.536	0.003	0.117	0.925	0.315	0.193	0.064	0.154	0.001	0.078	0.662155	0.005	0.175277	0.079	0.259	0.026	0.17606	0.054	1.606	0.004	0.0915526	0.106506	0.003	0.025	0.096	6.065	0.011	87.07	195.2	130.42	49.22	137.67	33.07	94.72	2.65	0.69	1722.34	124.03	63.1	1509.2	114.78	165.64	177.98	238.44
586	DN2PD	2	68	1.43571	0.005	0.396	0.005	0.092	0.822	0.329	0.138	0.032	0.081	0.001	0.05	0.662155	0.007	0.175277	0.051	0.179	0.064	0.132	0.046	1.096	0.004	0.0915526	0.038	0.011	0.019	0.047	6.241	0.011	65.9	268.8	174.02	74.8	168.58	39.7	110.7	2.33	0.66	2012.74	71.42	71.45	1875.94	279.7	310.96	314.89	271.11
587	DN2PD	1	66	1.43571	0.03	0.478	0	0.111	0.798	0.238	0.191	0.062	0.12	0.002	0.062	0.662155	0.008	0.175277	0.078	0.32	0.043	0.116	0.045	1.15	0.004	0.0915526	0.075	0.007	0.036	0.065	6.201	0.026	83.42	127.32	57.85	53.61	143.26	32.4	46.85	1.08	0.33	851.78	114.54	12.49	655.91	98.37	119.83	67.06	33.47
588	DN2PD	2	53	1.43571	0.016	0.469	0.019	0.063	0.929	0.35	0.208	0.027	0.072	0.001	0.035	0.662155	0.005	0.175277	0.071	0.162	0.019	0.191	0.036	0.942	0.00471947	0.0915526	0.146	0.031	0.032	0.043	6.084	0.033	58.65	284.76	135.67	129.58	259.88	49.74	84.81	1.05	0.33	1541.99	15.18	34.25	1549.5	256.19	257.52	190.63	25.94
589	DN2PD	2	60	1.43571	0.029	0.44	0.031	0.072	0.81	0.57	0.179	0.043	0.082	0.001	0.069	0.662155	0.00642394	0.175277	0.071	0.249	0.024	0.141	0.045	1.058	0.005	0.0915526	0.038	0.0235242	0.018	0.064	5.201	0.016	80.66	241.57	151.81	70.61	166.29	39.78	102.49	2.15	0.62	1863.57	94.26	81.15	1680.45	262.49	271.8	263.38	222.89
590	DN2PD	2	46	1.43571	0.026	0.316	0.008	0.077	0.662	0.281	0.179	0.041	0.13	0.001	0.07	0.662155	0.002	0.175277	0.048	0.21	0.029	0.109	0.035	0.792	0.006	0.0915526	0.053	0.009	0.034	0.052	5.313	0.007	73.91	185.05	77.69	88.48	206.04	47.61	55.68	0.88	0.27	1012.42	97.55	51.6	864.42	131.85	146.79	84.01	69.26
591	DN2PD	2	61	1.43571	0.038	0.621	0.005	0.129	0.781	0.317	0.157	0.067	0.133	0.001	0.054	0.662155	0.007	0.175277	0.053	0.28	0.03	0.194	0.03	1.909	0.00471947	0.0915526	0.074	0.021	0.025	0.108	6.942	0.009	105.9	156.74	72.17	61.13	160.6	36.25	66.88	1.18	0.42	1216.12	134.37	78.56	929.16	155.79	83.01	48.64	103.21
592	DN2PD	1	70	1.43571	0.02	0.397	0.019	0.082	0.731	0.291	0.176	0.052	0.134	0.001	0.055	0.662155	0.003	0.175277	0.063	0.25	0.047	0.101	0.046	1.047	0.00471947	0.0915526	0.05	0.007	0.024	0.071	8.092	0.017	99.48	187.55	124.42	35.89	103.55	23.96	100.24	3.47	0.97	1822.66	168.33	71.73	1581.95	146.34	184.32	143.02	177.73
593	DN2PD	1	58	1.43571	0	0.39	0.005	0.081	0.727	0.267	0.192	0.046	0.127	0.001	0.059	0.662155	0.003	0.175277	0.076	0.261	0.055	0.109	0.029	1.355	0.013	0.0915526	0.21	0.087	0.04	0.062	5.744	0.023	78.89	255.95	182.95	46.63	129.21	31.6	124.91	3.92	0.97	2271.2	124.78	83.22	2050.48	154.74	198.76	260.51	384.54
594	DN2PD	2	64	1.43571	0.004	0.45	0.019	0.073	0.949	0.392	0.178	0.058	0.126	0.00570588	0.076	0.662155	0.003	0.175277	0.08	0.241	0.031	0.128	0.03	0.978	0.005	0.0915526	0.061	0.017	0.025	0.07	5.84	0.01	167.13	251.03	148.8	58.82	152.96	37.4	114.16	2.53	0.75	2075.75	240.63	150.04	1661.98	225.9	168.49	162.43	273.64
595	DN2PD	1	79	1.43571	0.021	0.692	0.001	0.108	0.714	0.233	0.181	0.068	0.157	0.001	0.057	0.662155	0.016	0.175277	0.093	0.342	0.049	0.154	0.049	1.733	0.033	0.0915526	0.451	0.111	0.135	0.11	8.384	0.016	146.88	193.65	106.76	67.85	171.68	37.09	83.71	1.57	0.49	1522.02	200.45	49.57	1247.45	132.07	172.25	142.6	121.91
596	DN2PD	1	42	1.43571	0.002	0.505	0.008	0.102	0.859	0.331	0.136	0.041	0.12	0.002	0.067	0.662155	0.006	0.175277	0.076	0.267	0.032	0.14	0.042	2.122	0.005	0.0915526	0.02	0.011	0.024	0.116	5.596	0.017	133.43	226.85	158.49	43.6	123.12	33.93	109.52	3.64	0.89	1991.31	217.11	64.99	1736.73	117.43	207.92	270.49	334.29
597	DN2PD	1	61	1.43571	0.02	0.479	0.005	0.104	0.907	0.229	0.171	0.057	0.162	0.001	0.06	0.662155	0.003	0.175277	0.083	0.291	0.025	0.17606	0.035	1.138	0.006	0.0915526	0.106506	0.005	0.017	0.094	6.662	0.015	132.33	215.21	128.18	47.2	140.4	38.17	89.63	2.72	0.64	1629.69	152.68	83.01	1416.02	175.65	141.95	206.86	277.37
598	DN2PD	2	66	1.43571	0	0.445	0.012	0.067	0.873	0.349	0.195	0.045	0.111	0.001	0.078	0.662155	0.006	0.175277	0.065	0.243	0.037	0.17606	0.069	0.93	0.004	0.0915526	0.089	0.01	0.043	0.045	6.03	0.012	128.76	256.4	155.9	67.34	169.69	38.92	112.17	2.32	0.66	2039.55	183.76	114.38	1738.66	227.77	220.6	224.56	289.91
599	DN2PD	1	69	1.43571	0.043	0.359	0.031	0.079	0.753	0.23	0.144	0.036	0.094	0.003	0.09	0.662155	0.001	0.175277	0.084	0.19	0.032	0.107	0.066	1.491	0.00471947	0.0915526	0.203	0.036	0.069	0.123	5.618	0.009	71.76	205.37	141.29	45.76	129.47	29.63	104.87	3.09	0.81	1906.8	111.22	125.27	1708.39	207.21	193.08	262.67	369.42
600	DN2PD	2	68	1.43571	0.02	0.615	0.006	0.054	0.817	0.396	0.24	0.04	0.095	0.001	0.086	0.662155	0.001	0.175277	0.057	0.206	0.0310346	0.117	0.036	1.188	0.006	0.0915526	0.106506	0.0235242	0.021	0.064	5.633	0.014	171.43	193.76	87.35	65.37	171.07	37.64	79.7	1.34	0.47	1449.18	251.04	118.7	1052.55	178.48	120.57	102.04	154.51
601	DN2PD	1	62	1.43571	0.013	0.509	0.024	0.086	0.793	0.259	0.126	0.051	0.197	0.007	0.074	0.662155	0.008	0.175277	0.079	0.279	0.034	0.165	0.043	1.584	0.006	0.0915526	0.119	0.029	0.076	0.096	7.942	0.012	132.22	170.27	90.89	47.04	140.43	28.3	74.83	1.93	0.53	1360.55	151.34	55.93	1065.6	108.62	63.75	87.24	191.13
602	DN2PD	1	67	1.43571	0.019	0.403	0.019	0.116	0.628	0.244	0.076	0.118	0.101	0.00570588	0.057	0.662155	0.017	0.175277	0.052	0.228	0.02	0.17606	0.049	1.412	0.005	0.0915526	0.056	0.007	0.067	0.112	5.897	0.019	246.07	158.38	74.89	42.9	138.07	30.76	87.89	1.75	0.64	1598.09	357.9	62.18	1074.57	134.25	98.63	50.4	84.35
603	DN2PD	2	79	1.43571	0.032	0.479	0.023	0.077	0.738	0.388	0.179	0.029	0.08	0.001	0.067	0.662155	0.007	0.175277	0.06	0.19	0.027	0.114	0.042	2.169	0.003	0.0915526	0.106506	0.003	0.012	0.169	6.28	0.014	75.24	233.75	135.17	79.41	176.79	33.85	94.17	1.7	0.53	1712.28	82.51	40.97	1594.98	241.05	224.86	214.62	176.16
604	DN2PD	1	55	1.43571	0.007	0.511	0.027	0.131	0.853	0.267	0.085	0.079	0.138	0.00570588	0.062	0.662155	0.008	0.175277	0.067	0.284	0.022	0.17606	0.047	1.133	0.003	0.0915526	0.068	0.0235242	0.022	0.056	6.109	0.015	123.02	219.46	145.07	55.05	155.57	34.52	107.06	2.64	0.69	1946.66	162.04	66	1681.56	107.11	158.83	170.75	287.91
605	DN2PD	1	52	1.43571	0.044	0.448	0.009	0.109	0.669	0.295	0.152	0.073	0.187	0.006	0.087	0.662155	0.005	0.175277	0.073	0.327	0.03	0.2	0.032	1.443	0.014	0.0915526	0.218	0.117	0.081	0.086	7.64	0.019	97.25	120.46	46.42	48.86	133.26	27.47	49.48	0.95	0.37	899.74	146.53	57.95	575.1	130.04	66.88	18.37	27.29
606	DN2PD	1	60	1.43571	0	0.422	0.029	0.081	0.76	0.298	0.183	0.05	0.136	0.001	0.078	0.662155	0.007	0.175277	0.072	0.312	0.026	0.097	0.024	1.77	0.00471947	0.0915526	0.061	0.034	0.024	0.107	7.356	0.009	186.06	303.22	207.1	51.94	148.13	35.41	156.38	3.99	1.06	2843.44	266.97	130.69	2466.74	172.8	194.36	227.75	381.65
607	DN2PD	1	46	1.43571	0.016	0.446	0.001	0.084	0.879	0.252	0.195	0.074	0.185	0.001	0.054	0.662155	0.00642394	0.175277	0.082	0.328	0.039	0.126	0.015	1.209	0.003	0.0915526	0.035	0.008	0.037	0.069	5.814	0.012	76.56	192.85	104.11	63.16	154.84	39.14	72.25	1.65	0.47	1313.7	108.11	67.8	1133.27	176.42	170.4	142.76	143.13
608	DN2PD	1	39	1.43571	0.002	0.338	0.008	0.093	0.792	0.295	0.214	0.062	0.183	0.002	0.092	0.662155	0.004	0.175277	0.077	0.283	0.034	0.17606	0.023	0.902	0.013	0.0915526	0.221	0.064	0.062	0.045	4.954	0.008	70.92	203.54	126.44	54.44	138.82	36.19	89.29	2.32	0.64	1623.51	118.5	81.38	1357.42	185.12	194.21	159.13	182.35
609	DN2PD	2	77	1.43571	0.006	0.577	0.002	0.067	0.746	0.268	0.212	0.033	0.117	0	0.058	0.662155	0.007	0.175277	0.059	0.225	0.048	0.17606	0.015	2.583	0.005	0.0915526	0.043	0.006	0.021	0.162	5.631	0.036	150.77	283.95	162.85	72.88	187.2	40.61	118.76	2.23	0.63	2159.29	215.96	120.4	1793.25	279.75	217.9	246.35	311.15
610	DN2PD	1	57	1.43571	0.002	0.576	0.005	0.089	0.769	0.324	0.132	0.056	0.123	0.002	0.051	0.662155	0.006	0.175277	0.04	0.216	0.015	0.163	0.029	1.632	0.003	0.0915526	0.058	0.01	0.029	0.088	5.989	0.008	109.77	261.49	158.52	74.07	186.07	42.46	108.61	2.14	0.58	1974.77	171.91	75.44	1709.19	181.85	214.82	233.26	288.25
611	DN2PD	2	78	1.43571	0.028	0.532	0.014	0.12	0.923	0.543	0.171	0.047	0.11	0.007	0.096	0.662155	0.011	0.175277	0.06	0.228	0.043	0.17606	0.029	1.184	0.011	0.0915526	0.192	0.036	0.052	0.053	6.135	0.011	140.97	194.51	104.21	55.75	158.03	32.73	91.37	1.87	0.58	1661.44	213.98	108.83	1323.36	251.95	162.78	182.06	237.64
612	DN2PD	2	58	1.43571	0.018	0.538	0.013	0.083	0.738	0.254	0.133	0.079	0.156	0.00570588	0.063	0.662155	0.00642394	0.175277	0.086	0.339	0.0310346	0.172	0.037	1.042	0.011	0.0915526	0.179	0.01	0.033	0.057	15.688	0.011	200.11	212.91	117.88	53.01	152.21	33.53	97.62	2.22	0.64	1774.97	249.87	100.51	1391.8	117.49	83.59	88.51	201.97
613	DN2PD	1	46	1.43571	0.013	0.376	0.001	0.066	0.784	0.302	0.157	0.058	0.118	0.00570588	0.045	0.662155	0.006	0.175277	0.06	0.322	0.05	0.17606	0.024	1.177	0.003	0.0915526	0.057	0.0235242	0.028	0.059	5.404	0.015	95.45	184.15	113.57	40.77	126.13	31.28	84.94	2.79	0.67	1544.38	142.51	62.6	1297.51	136.66	151.93	130.03	199.41
614	DN2PD	1	49	1.43571	0.005	0.346	0.004	0.094	0.768	0.309	0.147	0.067	0.107	0.00570588	0.042	0.662155	0.012	0.175277	0.039	0.224	0.026	0.101	0.012	0.847	0.003	0.0915526	0.106506	0.0235242	0.037	0.055	4.551	0.018	183.29	249.7	136.05	61.39	172.09	38.32	114.16	2.22	0.66	2075.77	272.11	85.1	1649.57	202.01	132.54	143.85	239.99
615	DN2PD	1	77	1.43571	0.03	0.348	0.012	0.089	0.712	0.628	0.164	0.025	0.112	0.001	0.059	0.662155	0.00642394	0.175277	0.066	0.227	0.046	0.116	0.026	1.827	0.01	0.0915526	0.199	0.056	0.075	0.058	6.156	0.016	76.88	191.56	122.54	55.65	142.93	29.38	89.94	2.2	0.63	1635.37	128.44	65.25	1428.8	84.92	143.1	150.33	228.22
616	DN2PD	2	29	1.43571	0.011	0.36	0.005	0.073	0.663	0.293	0.181	0.052	0.105	0.001	0.047	0.662155	0.00642394	0.175277	0.056	0.271	0.039	0.17606	0.026	0.982	0.001	0.0915526	0.106506	0.008	0.016	0.064	4.967	0.019	83.32	170.08	81.08	68.82	174.86	36.5	65	1.18	0.37	1181.87	107.65	78.55	955.71	213.33	196.07	127.61	115.01
617	DN2PD	2	61	1.43571	0.029	0.363	0.005	0.05	0.858	0.355	0.18	0.036	0.063	0.001	0.056	0.662155	0.003	0.175277	0.054	0.205	0.118	0.129	0.025	1.165	0.017	0.0915526	0.292	0.121	0.054	0.061	6.037	0.01	42.27	252.69	151.56	87.84	179.11	36.43	95.03	1.73	0.53	1727.88	18.91	22.87	1744.8	233.32	266.76	258.4	156.7
618	DN2PD	1	49	1.43571	0.006	0.422	0	0.083	0.805	0.287	0.156	0.058	0.146	0.003	0.051	0.662155	0.004	0.175277	0.055	0.248	0.022	0.17606	0.03	0.997	0.003	0.0915526	0.03	0.015	0.02	0.047	5.803	0.013	78	209.7	137.17	51.09	147.65	36.85	102.94	2.69	0.7	1871.65	110.07	92.04	1646.17	143.66	120.25	170.39	314.31
619	DN2PD	2	60	1.43571	0.036	0.509	0.037	0.084	0.776	0.44	0.143	0.057	0.085	0.001	0.069	0.662155	0.008	0.175277	0.075	0.189	0.035	0.166	0.035	1.676	0.004	0.0915526	0.106506	0.0235242	0.033	0.11	7.34	0.013	62.44	292.89	163.4	121.57	237.33	44.31	93.62	1.34	0.39	1702.29	27.2	18.53	1700.16	264.23	374.18	270.8	93.4
620	DN2PD	2	65	1.43571	0.001	0.379	0.029	0.065	0.816	0.37	0.167	0.04	0.101	0.001	0.053	0.662155	0.006	0.175277	0.071	0.256	0.024	0.116	0.027	1.711	0.003	0.0915526	0.034	0.007	0.032	0.12	5.125	0.017	134.78	297.92	192.44	66.48	174.36	41.4	129.97	2.89	0.75	2363.28	172.72	119.15	2046.42	344.95	313.25	357.64	395.83
621	DN2PD	1	64	1.43571	0.022	0.474	0.025	0.105	0.792	0.243	0.116	0.054	0.136	0.003	0.041	0.662155	0.007	0.175277	0.087	0.324	0.051	0.123	0.032	1.52	0.003	0.0915526	0.122	0.012	0.028	0.111	9.386	0.013	103.87	230.03	146.74	56.09	158.13	37.1	107.69	2.62	0.68	1958.03	132.97	104.25	1735.33	141.95	127.09	183.52	349.15
622	DN2PD	2	74	1.43571	0.002	0.355	0.039	0.074	0.879	0.403	0.151	0.031	0.109	0.00570588	0.049	0.662155	0.003	0.175277	0.061	0.22	0.028	0.156	0.021	1.09	0.004	0.0915526	0.101	0.03	0.047	0.05	6.103	0.028	47.59	199.94	109.04	80.93	184.37	37.48	76.38	1.35	0.41	1388.75	44.49	38.2	1279.99	204.04	190.36	176.95	144.98
623	DN2PD	1	75	1.43571	0.029	0.607	0.078	0.098	0.697	0.228	0.099	0.083	0.155	0.006	0.068	0.662155	0.009	0.175277	0.072	0.346	0.023	0.23	0.028	1.754	0.012	0.0915526	0.167	0.061	0.056	0.066	9.34	0.027	167.94	157.85	83.56	46.25	128.01	24.43	81.73	1.81	0.64	1486.05	239.48	97.93	1061.04	112.94	96.82	48.93	104.47
624	DN2PD	1	72	1.43571	0.023	0.369	0.012	0.108	0.76	0.25	0.167	0.042	0.088	0.002	0.064	0.662155	0.017	0.175277	0.078	0.281	0.048	0.108	0.057	1.281	0.004	0.0915526	0.088	0.021	0.042	0.067	6.166	0.013	210.58	224.14	132.22	48.59	143.45	32.21	117.14	2.72	0.82	2129.92	274.3	71.1	1708.77	166.84	132.15	97.73	156.56
625	DN2PD	2	58	1.43571	0.047	0.39	0.026	0.082	0.928	0.435	0.171	0.049	0.09	0.003	0.059	0.662155	0.005	0.175277	0.086	0.201	0.035	0.155	0.046	1.348	0.022	0.0915526	0.276	0.047	0.046	0.071	4.902	0.014	64.98	207.35	107.91	86.7	182.61	38.9	75.54	1.24	0.41	1373.44	85.15	45.27	1260.19	182.34	219.49	165.49	67
626	DN2PD	1	69	1.43571	0.02	0.491	0.011	0.079	0.752	0.237	0.175	0.058	0.194	0.002	0.068	0.662155	0.006	0.175277	0.081	0.319	0.0310346	0.126	0.044	1.88	0.005	0.0915526	0.047	0.014	0.051	0.097	6.459	0.011	73.72	177.8	108.55	57.13	144.52	35.7	78.39	1.9	0.54	1425.31	109.55	63.72	1211	131.92	198.69	150.31	127.1
627	DN2PD	2	62	1.43571	0.007	0.365	0.037	0.092	0.695	0.398	0.087	0.0551088	0.072	0.005	0.047	0.662155	0.018	0.175277	0.069	0.195	0.031	0.13	0.035	1.106	0.004	0.0915526	0.091	0.017	0.027	0.077	6.208	0.014	226.09	269.51	145.58	48.73	145.16	28.13	136.06	2.99	0.94	2473.92	346.25	98.38	1957.49	258.29	157.87	119.96	148.38
628	DN2PD	2	51	1.43571	0.021	0.317	0.002	0.069	0.854	0.234	0.169	0.026	0.086	0.00570588	0.051	0.662155	0.00642394	0.175277	0.063	0.203	0.045	0.129	0.043	1.182	0.015	0.0915526	0.237	0.053	0.039	0.057	5.471	0.01	84.47	205.9	111.39	69.84	188.81	40.64	84.79	1.59	0.45	1541.74	121.52	88.18	1244.63	167.03	102.04	132.79	246.87
629	DN2PD	1	51	1.43571	0.015	0.356	0.009	0.097	0.854	0.256	0.125	0.082	0.131	0.003	0.078	0.662155	0.015	0.175277	0.049	0.326	0.019	0.17606	0.024	0.658	0.002	0.0915526	0.093	0.014	0.054	0.041	6.29	0.01	213.21	218.78	111.49	47.21	148.68	34.49	103.52	2.36	0.7	1882.33	324.07	80.42	1366.83	147.43	95.96	43.74	116.79
630	DN2PD	1	61	1.43571	0.004	0.416	0	0.102	0.718	0.267	0.161	0.069	0.175	0.002	0.061	0.662155	0.00642394	0.175277	0.072	0.338	0.039	0.13	0.041	0.945	0.017	0.0915526	0.281	0.047	0.051	0.049	7.234	0.011	143.55	206.21	139.13	34.77	119.19	25.52	111.18	4	0.93	2021.59	221.3	64.89	1726.41	132.42	157.76	216.11	329.69
631	DN2PD	1	62	1.43571	0.034	0.693	0.001	0.134	0.785	0.301	0.195	0.072	0.185	0.003	0.08	0.662155	0.009	0.175277	0.087	0.351	0.024	0.118	0.043	1.63	0.005	0.0915526	0.106506	0.007	0.043	0.089	6.08	0.01	94.06	202.13	120.19	63.44	162.05	34.89	87.8	1.89	0.54	1596.37	145.41	55.86	1388.16	118.75	173.08	154.41	190.7
632	DN2PD	1	75	1.43571	0.079	0.585	0.001	0.102	0.77	0.376	0.144	0.056	0.174	0.005	0.081	0.662155	0.005	0.175277	0.08	0.302	0.031	0.17606	0.034	1.499	0.002	0.0915526	0.134	0.015	0.025	0.072	5.857	0.013	99.25	142.78	63.31	60.36	162.65	33.91	55.49	1.05	0.34	1008.9	168.39	65.78	693.68	92.47	104.86	57.37	97.17
633	DN2PD	2	75	1.43571	0.023	0.631	0.018	0.116	0.8	0.357	0.137	0.048	0.131	0.004	0.052	0.662155	0.003	0.175277	0.058	0.271	0.073	0.199	0.038	2.228	0.007	0.0915526	0.1	0.026	0.044	0.119	7.404	0.037	114.28	162.68	66.88	63.06	161.52	33.35	70.2	1.06	0.43	1276.44	155.53	93.68	967.51	228.57	100.02	63.55	71.92
634	HS	2	67	1.43571	0.019	0.694	0.008	0.095	0.784	0.278	0.153	0.098	0.183	0.002	0.118	0.662155	0.011	0.175277	0.137	0.345	0.0310346	0.17606	0.038	2.027	0.006	0.0915526	0.106506	0.0235242	0.027	0.109	6.855	0.02	152.5	248.47	149.78	63.96	160.29	37.78	113.36	2.34	0.71	2061.14	206.02	100.99	1774.22	225.25	225.03	222.12	253.85
635	HS	1	72	1.43571	0.007	0.562	0.005	0.12	0.805	0.261	0.176	0.063	0.081	0.008	0.058	0.662155	0.016	0.175277	0.089	0.238	0.031	0.16	0.024	2.852	0.008	0.0915526	0.029	0.009	0.0308667	0.156	5.943	0.017	326.67	210.43	82.61	46.93	137	30.57	90.94	1.76	0.66	1653.58	345.8	121.25	1144.47	154.31	73.56	8.98	13.59
636	HS	1	79	1.43571	0.035	0.535	0.014	0.103	0.697	0.259	0.179	0.029	0.095	0.00570588	0.049	0.662155	0.007	0.175277	0.062	0.239	0.024	0.142	0.05	4.175	0.011	0.0915526	0.106506	0.006	0.014	0.155	6.957	0.015	95.23	253.5	143.11	95.36	220.44	44.79	97.68	1.5	0.44	1776.11	109.77	42.27	1625.52	155.6	211.8	202.46	197.38
637	HS	1	70	1.43571	0.02	0.821	0.025	0.125	0.865	0.281	0.194	0.096	0.154	0.002	0.081	0.662155	0.006	0.175277	0.073	0.391	0.029	0.177	0.024	2.536	0.001	0.0915526	0.076	0.0235242	0.02	0.118	8.92	0.016	174.48	217.3	115.42	54.44	146.67	35.82	94.95	2.12	0.65	1726.44	224.14	101.56	1381.14	157.9	123.14	87.56	154.67
638	HS	2	72	1.43571	0.026	0.495	0.022	0.1	0.699	0.257	0.181	0.052	0.127	0.002	0.067	0.662155	0.005	0.175277	0.073	0.257	0.03	0.116	0.036	1.195	0.004	0.0915526	0.106506	0.0235242	0.015	0.085	6.243	0.012	176.62	304.54	170.61	91.74	219.96	45.29	122.49	1.86	0.56	2227.13	187.5	113.19	1910.1	316.96	263.65	283.3	317.77
639	HS	2	72	1.43571	0.032	0.36	0.065	0.074	0.663	0.226	0.168	0.0551088	0.082	0.003	0.048	0.662155	0.003	0.175277	0.086	0.196	0.039	0.147	0.038	2.182	0.004	0.0915526	0.053	0.01	0.018	0.105	5.7	0.01	78.07	273.89	166.99	88.25	208.62	44.33	115.71	1.89	0.55	2103.97	70.37	89.86	1938.76	310.18	267.34	294.25	306.47
640	HS	2	65	1.43571	0.003	0.469	0.023	0.086	0.73	0.275	0.191	0.024	0.083	0.00570588	0.048	0.662155	0.00642394	0.175277	0.07	0.177	0.03	0.093	0.035	1.682	0.005	0.0915526	0.106506	0.0235242	0.024	0.068	5.146	0.006	80.89	261.54	165.5	77.02	186.12	39.67	114.29	2.15	0.61	2078.05	101.44	75.71	1903.01	195.59	211.46	244.1	313.08
641	HS	2	64	1.43571	0.004	0.4	0.055	0.071	0.782	0.417	0.143	0.0551088	0.088	0.00570588	0.056	0.662155	0.007	0.175277	0.09	0.147	0.026	0.17606	0.017	1.762	0.007	0.0915526	0.061	0.011	0.021	0.094	6.306	0.016	249.16	278.54	121.89	68.53	208.22	57.45	114.27	1.78	0.55	2077.71	372.98	199.17	1461.85	136.58	26.39	53.62	289.45
642	HS	2	67	1.43571	0.028	0.667	0.008	0.068	0.774	0.392	0.194	0.041	0.072	0.001	0.072	0.662155	0.003	0.175277	0.083	0.259	0.031	0.182	0.024	3.092	0.006	0.0915526	0.038	0.008	0.009	0.161	6.742	0.014	106.69	257.09	169.38	66.56	167.88	42.73	121.05	2.54	0.72	2201	133.95	125.56	2013.3	169.07	164.18	240.33	370.45
643	HS	2	72	1.43571	0.007	0.681	0.011	0.072	0.862	0.587	0.194	0.052	0.104	0.001	0.064	0.662155	0.002	0.175277	0.081	0.255	0.044	0.149	0.028	3.302	0.005	0.0915526	0.04	0.011	0.021	0.156	6.167	0.014	106.12	334.87	213.31	92.35	202.25	40.63	142.5	2.31	0.7	2591.06	98.68	126.83	2414.95	443.46	441.05	408.61	301.95
644	HS	1	79	1.43571	0.027	0.415	0.005	0.093	0.873	0.236	0.103	0.064	0.107	0.003	0.053	0.662155	0.005	0.175277	0.077	0.242	0.034	0.112	0.027	1.346	0.004	0.0915526	0.09	0.014	0.025	0.041	6.896	0.023	72.83	227.1	148.3	59.5	155.14	33.51	105.2	2.49	0.68	1912.77	83.79	68.72	1797.11	171.68	172.3	240.34	316.25
645	HS	1	77	1.43571	0.024	0.315	0.005	0.123	0.729	0.244	0.096	0.058	0.093	0.002	0.069	0.662155	0.00642394	0.175277	0.097	0.267	0.052	0.086	0.028	0.935	0.003	0.009	0.049	0.027	0.027	0.07	5.562	0.028	91.16	269.88	189.44	54.71	142.98	30.34	147.56	3.46	1.03	2683.08	140.45	139.1	2424.49	244.08	201.76	251.08	368.16
646	HS	2	61	1.43571	0.019	0.472	0.01	0.056	0.783	0.428	0.225	0.037	0.101	0.001	0.059	0.662155	0.00642394	0.175277	0.051	0.238	0.045	0.105	0.026	1.94	0.005	0.0915526	0.106506	0.007	0.023	0.082	5.04	0.012	81.08	278.26	164.38	84.98	194.51	40.8	110.94	1.93	0.57	2017.24	87.63	84.23	1820.34	359.65	308.87	280	223.28
647	HS	1	76	1.43571	0.007	0.552	0.001	0.084	0.798	0.403	0.194	0.045	0.103	0.002	0.098	0.662155	0.006	0.175277	0.083	0.328	0.034	0.095	0.014	2.027	0.004	0.0915526	0.035	0.005	0.026	0.086	6.173	0.031	94.12	267.67	174.15	66.79	164.55	38.94	114.19	2.61	0.69	2076.35	112.34	84.09	1869.4	269.67	328.19	311.48	267.29
648	HS	2	72	1.43571	0.021	0.499	0.019	0.069	0.782	0.315	0.212	0.046	0.086	0.001	0.064	0.662155	0.006	0.175277	0.086	0.269	0.022	0.109	0.02	1.922	0.004	0.0915526	0.018	0.013	0.015	0.127	6.009	0.011	78.04	253.39	118.79	109.23	224.67	41.94	84.75	1.09	0.38	1540.94	55.59	60.95	1453.09	325.11	251.87	168.01	16.55
649	HS	2	67	1.43571	0.001	0.496	0.001	0.058	0.793	0.291	0.197	0.0551088	0.111	0.001	0.054	0.662155	0.005	0.175277	0.052	0.24	0.025	0.122	0.026	2.195	0.004	0.0915526	0.106506	0.003	0.013	0.134	6.655	0.014	286.6	367.6	211.11	53.39	155.3	41.82	180.72	3.95	1.16	3285.99	464.2	265.93	2632.39	311.61	176.16	211.86	426.01
650	HS	1	77	1.43571	0.012	0.357	0.003	0.085	0.661	0.239	0.179	0.026	0.115	0.002	0.061	0.662155	0.004	0.175277	0.039	0.23	0.025	0.179	0.033	1.613	0.017	0.0915526	0.164	0.036	0.073	0.064	5.759	0.016	61.7	216.85	134.87	66.54	148.72	33.89	94.11	2.03	0.63	1711.16	78.04	68.14	1619.86	213.7	226.26	223.91	173.94
651	HS	2	76	1.43571	0.016	0.366	0.018	0.099	0.757	0.488	0.174	0.026	0.096	0.001	0.059	0.662155	0.007	0.175277	0.056	0.228	0.0310346	0.17606	0.027	1.537	0.006	0.0915526	0.051	0.0235242	0.03	0.08	5.389	0.014	232.27	365.12	175.48	87.84	212.43	46.46	161.4	2	0.76	2934.63	381.11	304.28	2176.46	594.75	228.9	196.82	267.11
652	HS	2	74	1.43571	0.026	0.412	0.059	0.072	0.763	0.321	0.191	0.025	0.087	0.001	0.056	0.662155	0.008	0.175277	0.074	0.171	0.025	0.17606	0.028	1.279	0.003	0.0915526	0.066	0.008	0.019	0.079	6.84	0.02	99.31	361.42	239.86	88.83	220.09	47.67	156.49	2.7	0.71	2845.36	91.71	110.01	2628.93	348.93	305.31	395.72	488.36
653	HS	1	75	1.43571	0.022	0.384	0	0.072	0.736	0.297	0.166	0.041	0.097	0.001	0.056	0.662155	0.006	0.175277	0.069	0.241	0.0310346	0.135	0.028	1.26	0.004	0.0915526	0.079	0.009	0.022	0.057	5.564	0.017	118.66	243.44	141.66	70.62	175.67	37.07	103.02	2.01	0.59	1873.1	172.98	70.13	1598.38	158.86	176.52	193.24	246.22
654	ADVPD	1	72	1.43571	0.019	0.327	0.002	0.11	0.615	0.332	0.034	0.041	0.119	0.00570588	0.053	0.662155	0.00642394	0.175277	0.039	0.25	0.027	0.158	0.019	2.822	0.017	0.0915526	0.266	0.08	0.12	0.158	5.277	0.025	60.27	175.59	115.18	46.79	120.74	30.12	89.49	2.46	0.74	1627.19	121.71	94.71	1433.24	235.73	238.68	178.79	127.12
655	ADVPD	2	52	1.43571	0	0.402	0.008	0.063	0.655	0.44	0.104886	0.047	0.091	0.00570588	0.046	0.662155	0.005	0.175277	0.059	0.199	0.023	0.17606	0.022	2.018	0.00471947	0.0915526	0.072	0.01	0.027	0.12	6.154	0.01	188.42	238.57	156.54	36.29	95.91	31.59	128.17	4.31	1.34	2330.48	281.2	163.06	1988.57	261.75	182.57	230.32	331.08
656	ADVPD	1	70	1.43571	0.012	0.4	0.002	0.071	0.807	0.273	0.123	0.051	0.102	0	0.074	0.662155	0.007	0.175277	0.088	0.221	0.039	0.17606	0.014	1.573	0.002	0.0915526	0.106506	0.0235242	0.019	0.069	6.209	0.017	58.66	262.02	158.74	84.52	182.09	38.11	101.86	1.88	0.56	1852.16	41.97	63.13	1770.35	285.14	285.68	250.58	189.33
657	ADVPD	1	73	1.43571	0.003	0.532	0.006	0.071	0.684	0.377	0.071	0.04	0.083	0.001	0.069	0.291	0.013	0.175277	0.044	0.227	0.022	0.17606	0.007	2.382	0.002	0.0915526	0.106506	0.0235242	0.046	0.186	6.039	0.021	216.43	215.03	121.28	41.97	116.43	27.14	106.59	2.89	0.92	1938.07	284.82	73.34	1576.14	176.83	160.99	81.23	91.86
658	ADVPD	1	59	1.43571	0.012	0.442	0.011	0.067	0.79	0.367	0.104886	0.058	0.155	0.001	0.052	0.662155	0.004	0.175277	0.065	0.322	0.052	0.149	0.023	1.456	0.003	0.0915526	0.045	0.02	0.02	0.093	5.231	0.008	65.81	177.46	104.23	50.56	121.22	30.44	83.1	2.06	0.69	1510.91	101.53	71.77	1338.92	201.24	184.25	116.45	109.23
659	ADVPD	1	64	1.43571	0.033	0.693	0	0.063	0.725	0.346	0.104886	0.09	0.134	0	0.055	0.442	0.001	0.175277	0.048	0.276	0.025	0.17606	0.015	1.714	0.00471947	0.0915526	0.044	0.006	0.02	0.112	6.217	0.008	62.35	135.17	64.64	51.62	133.67	33.67	53.33	1.25	0.4	969.63	86.98	71.38	757	159.4	126.01	54.75	38.65
660	ADVPD	2	66	1.43571	0.013	0.397	0.023	0.061	0.889	0.389	0.041	0.021	0.102	0.00570588	0.057	0.662155	0.008	0.175277	0.061	0.203	0.051	0.17606	0.02	1.544	0.00471947	0.0915526	0.106506	0.001	0.009	0.092	5.456	0.008	95.91	289.04	179.7	76.06	173.58	40.26	120.25	2.36	0.69	2186.51	130.1	112.55	1976.35	338.32	284.39	304.08	324.73
661	ADVPD	1	75	1.43571	0.001	0.426	0	0.213	0.739	0.265	0.104886	0.044	0.141	0.002	0.09	0.662155	0.009	0.175277	0.064	0.264	0.054	0.17606	0.034	1.655	0.00471947	0.0915526	0.053	0.011	0.031	0.093	6.386	0.031	135.89	182.21	92.31	50.33	137.8	35.43	76.67	1.83	0.56	1394.1	195.11	76.73	1053.37	148.25	101.79	61.78	104.75
662	ADVPD	2	73	1.43571	0.022	0.417	0.005	0.052	0.729	0.35	0.159	0.026	0.074	0.001	0.043	0.662155	0.003	0.175277	0.064	0.155	0.038	0.17606	0.011	1.302	0.00471947	0.0915526	0.106506	0.0235242	0.017	0.037	5.425	0.009	47.71	238.9	139.93	85.76	176.84	38.74	87.45	1.63	0.49	1590.11	39.58	45.11	1550.49	264.01	289.36	234.25	114.16
663	ADVPD	1	66	1.43571	0.006	0.388	0.007	0.057	0.758	0.37	0.045	0.034	0.055	0.001	0.04	0.662155	0.008	0.175277	0.041	0.169	0.033	0.17606	0.013	1.865	0.003	0.031	0.106506	0.006	0.014	0.075	4.481	0.009	169.5	231.57	126.57	65.8	158.03	30	104.34	1.92	0.66	1897.15	240.18	102.72	1597.54	282.13	255.09	204.27	111.81
664	ADVPD	1	76	1.43571	0.005	0.375	0	0.088	0.634	0.287	0.104886	0.049	0.088	0.002	0.063	0.662155	0.007	0.175277	0.071	0.279	0.047	0.17606	0.014	1.438	0.02	0.0915526	0.202	0.046	0.034	0.068	4.967	0.01	56.86	245.76	143.38	77.93	167.25	37.23	95.75	1.84	0.57	1740.91	54.83	69.95	1647	230.59	185.18	210.66	195.13
665	ADVPD	1	67	1.43571	0.009	0.641	0.007	0.112	0.747	0.248	0.162	0.052	0.176	0.00570588	0.056	0.662155	0.004	0.175277	0.054	0.27	0.026	0.159	0.023	2.399	0.005	0.0915526	0.063	0.0235242	0.029	0.119	9.374	0.006	79.6	172.7	104.56	48.34	122.85	30.78	79.87	2.16	0.65	1452.28	128.7	87.47	1221.63	151.18	181.43	116.03	141.97
666	ADVPD	2	77	1.43571	0.015	0.686	0	0.122	0.654	0.384	0.121	0.046	0.113	0.001	0.094	0.662155	0.003	0.175277	0.068	0.291	0.042	0.17606	0.013	3.102	0.003	0.0915526	0.106506	0.009	0.026	0.121	5.716	0.021	114.28	165.24	75.36	50.68	134.36	29.98	69.4	1.49	0.52	1261.95	167.06	66.91	958.02	205.01	119.28	54.28	54.09
667	ADVPD	2	69	1.43571	0.007	0.559	0.038	0.079	0.898	0.516	0.188	0.034	0.072	0.001	0.067	0.662155	0.00642394	0.175277	0.09	0.151	0.03	0.17606	0.016	1.522	0.002	0.0915526	0.106506	0.006	0.016	0.08	5.093	0.014	107.47	249.06	142.47	76	179.61	35.7	101.21	1.87	0.56	1840.2	134.49	82.09	1606.37	207.88	192.56	170.81	182.96
668	ADVPD	1	72	1.43571	0.02	0.382	0.005	0.055	0.717	0.417	0.168	0.03	0.1	0	0.07	0.427	0.00642394	0.175277	0.088	0.229	0.031	0.175	0.006	1.759	0.014	0.012	0.256	0.025	0.025	0.096	9.512	0.024	83.65	139.83	63.77	47.11	107.4	22.61	70.07	1.35	0.65	1274.12	154.69	95.08	1025.35	230.18	153.46	73.13	0
669	ADVPD	2	60	1.43571	0.003	0.443	0.004	0.072	0.583	0.365	0.155	0.03	0.077	0.001	0.07	0.662155	0.006	0.175277	0.076	0.291	0.043	0.154	0.017	2.798	0.006	0.0915526	0.032	0.01	0.014	0.217	7.749	0.046	241.51	237.05	131.12	37.13	104.22	28.13	127.38	3.53	1.22	2316.02	352.45	205.78	1869.19	279.84	128.03	138.2	248.79
670	ADVPD	1	84	1.43571	0.035	0.51	0	0.079	0.913	0.364	0.104886	0.046	0.155	0.002	0.059	0.662155	0.007	0.175277	0.056	0.257	0.031	0.17606	0.018	1.65	0.008	0.0915526	0.169	0.0235242	0.062	0.081	5.814	0.021	87.4	182.56	91.87	65.98	162.09	38.87	66.79	1.39	0.41	1214.51	136.2	70.64	981.47	155.69	172.16	117.9	91.23
671	ADVPD	1	78	1.43571	0.022	0.442	0	0.085	0.692	0.304	0.043	0.048	0.111	0.001	0.069	0.662155	0.007	0.175277	0.064	0.262	0.064	0.17606	0.016	1.592	0.00471947	0.0915526	0.182	0.037	0.073	0.137	6.211	0.019	64.92	186.31	104.74	58.73	136.58	29.28	72.26	1.78	0.53	1313.87	82.25	46.82	1198.03	186.99	176.2	164.04	145.87
672	ADVPD	1	67	1.43571	0.02	0.462	0	0.087	0.828	0.349	0.104886	0.088	0.218	0	0.063	0.662155	0.008	0.175277	0.103	0.361	0.03	0.17606	0.022	0.832	0.006	0.0915526	0.062	0.018	0.034	0.034	5.872	0.028	128.53	225.81	137.15	56.27	147.48	33.66	104.74	2.44	0.71	1904.41	179.07	74.63	1632.18	162.7	162.5	145.26	219.56
673	ADVPD	1	68	1.43571	0.006	0.516	0.003	0.102	0.81	0.292	0.104886	0.062	0.155	0	0.059	0.662155	0.006	0.175277	0.055	0.259	0.036	0.17606	0.019	1.078	0.009	0.0915526	0.085	0.022	0.031	0.081	6.722	0.006	166.74	230.09	128.5	46.6	129.83	34.38	106.07	2.76	0.82	1928.57	277.65	122.58	1492.56	186.89	169.38	114.02	158.55
674	ADVPD	1	59	1.43571	0.026	0.527	0.01	0.104	0.664	0.399	0.104886	0.091	0.115	0.001	0.082	0.662155	0.006	0.175277	0.088	0.269	0.062	0.17606	0.011	3.222	0.005	0.0915526	0.106506	0.022	0.031	0.237	10.409	0.031	42.32	186.06	109.35	64.3	148.45	35.72	72.88	1.7	0.49	1325.22	46.85	38.82	1214.33	128.85	152.46	114.12	120.01
675	ADVPD	2	70	1.43571	0.012	0.483	0.034	0.082	0.683	0.418	0.185	0.03	0.086	0.002	0.056	0.662155	0.003	0.175277	0.078	0.203	0.025	0.12	0.008	1.864	0.005	0.0915526	0.106506	0.006	0.016	0.094	5.017	0.043	70.99	197.95	109.59	67.71	155.71	33.96	78.95	1.62	0.51	1435.54	93.96	45.63	1271.79	189.6	176.71	150.51	118.04
[truncated: 95 more columns]

## Sheet: NMR bucketed spectra
ID	diagnosis	sex	age	PROBABILITY	9.99	9.97	9.95	9.93	9.91	9.89	9.87	9.85	9.83	9.81	9.79	9.77	9.75	9.73	9.71	9.69	9.67	9.65	9.63	9.61	9.59	9.57	9.55	9.53	9.51	9.49	9.47	9.45	9.43	9.41	9.39	9.37	9.35	9.33	9.31	9.29	9.27	9.25	9.23	9.21	9.19	9.17	9.15	9.13	9.11
1	SIB	2	23	0.0355641	1.27522e+06	1.20514e+06	1.16607e+06	1.12907e+06	1.15967e+06	1.15608e+06	1.17941e+06	1.20528e+06	1.21673e+06	1.24824e+06	1.2908e+06	1.39103e+06	1.38094e+06	1.44375e+06	1.55897e+06	1.57853e+06	1.67559e+06	1.74015e+06	1.9091e+06	1.97074e+06	2.13688e+06	2.16136e+06	2.34612e+06	2.54402e+06	2.6187e+06	2.72909e+06	2.834e+06	3.01422e+06	3.15023e+06	3.18569e+06	3.30099e+06	3.45995e+06	3.53278e+06	3.60771e+06	3.6456e+06	3.81174e+06	3.96586e+06	4.08653e+06	4.14595e+06	4.18464e+06	4.26865e+06	4.23059e+06	4.3096e+06	4.46768e+06	4.62714e+06
2	SIB	2	53	0.0411314	1.33825e+06	1.26843e+06	1.21486e+06	1.1976e+06	1.22385e+06	1.22495e+06	1.26668e+06	1.23318e+06	1.28612e+06	1.36289e+06	1.35402e+06	1.37247e+06	1.37507e+06	1.47849e+06	1.57815e+06	1.62817e+06	1.68299e+06	1.74568e+06	1.82982e+06	1.95581e+06	2.09379e+06	2.17333e+06	2.31784e+06	2.47212e+06	2.57155e+06	2.69847e+06	2.8104e+06	2.91832e+06	3.06893e+06	3.06535e+06	3.15897e+06	3.31179e+06	3.50288e+06	3.50749e+06	3.58177e+06	3.71106e+06	3.81213e+06	3.91994e+06	3.97002e+06	3.9949e+06	4.09874e+06	4.09705e+06	4.17896e+06	4.31408e+06	4.49006e+06
3	SIB	2	54	0.0730992	1.24852e+06	1.24809e+06	1.17348e+06	1.17222e+06	1.16878e+06	1.13396e+06	1.18432e+06	1.25303e+06	1.26066e+06	1.25439e+06	1.2637e+06	1.34491e+06	1.37825e+06	1.40522e+06	1.47175e+06	1.55989e+06	1.64494e+06	1.69883e+06	1.75428e+06	1.86055e+06	1.9867e+06	2.16206e+06	2.32641e+06	2.56548e+06	2.6513e+06	2.74197e+06	2.79385e+06	2.87406e+06	2.9525e+06	2.98742e+06	3.07169e+06	3.1038e+06	3.28323e+06	3.3712e+06	3.467e+06	3.70492e+06	3.8713e+06	3.98456e+06	3.97458e+06	3.98535e+06	3.99022e+06	3.99667e+06	4.02835e+06	4.19197e+06	4.42961e+06
4	SIB	1	52	0.0742291	1.40538e+06	1.33441e+06	1.27347e+06	1.2653e+06	1.32284e+06	1.34909e+06	1.33299e+06	1.34825e+06	1.40283e+06	1.45923e+06	1.4643e+06	1.55787e+06	1.57017e+06	1.64415e+06	1.7466e+06	1.84054e+06	1.90023e+06	1.94237e+06	2.01048e+06	2.14481e+06	2.2529e+06	2.43428e+06	2.62267e+06	2.82516e+06	2.91082e+06	2.98755e+06	3.10155e+06	3.23019e+06	3.34288e+06	3.40934e+06	3.50894e+06	3.70694e+06	3.74671e+06	3.8785e+06	3.93831e+06	4.15994e+06	4.31771e+06	4.41476e+06	4.4816e+06	4.57248e+06	4.54496e+06	4.57519e+06	4.68926e+06	4.83714e+06	5.02773e+06
5	SIB	2	59	0.0770937	1.33607e+06	1.34362e+06	1.27826e+06	1.27971e+06	1.22932e+06	1.25941e+06	1.27518e+06	1.28117e+06	1.3313e+06	1.33452e+06	1.38799e+06	1.44706e+06	1.47696e+06	1.55407e+06	1.62366e+06	1.67404e+06	1.76368e+06	1.84099e+06	1.89348e+06	2.06726e+06	2.1324e+06	2.27325e+06	2.41439e+06	2.56193e+06	2.68376e+06	2.79088e+06	2.84496e+06	2.99748e+06	3.13271e+06	3.17653e+06	3.21614e+06	3.43477e+06	3.58292e+06	3.54999e+06	3.66444e+06	3.81781e+06	3.9953e+06	4.12965e+06	4.18627e+06	4.17898e+06	4.20311e+06	4.23364e+06	4.28485e+06	4.46403e+06	4.64989e+06
6	SIB	2	59	0.0770937	1.21233e+06	1.17074e+06	1.13037e+06	1.10779e+06	1.08084e+06	1.07384e+06	1.11993e+06	1.13751e+06	1.16232e+06	1.22192e+06	1.24432e+06	1.30242e+06	1.33876e+06	1.38575e+06	1.41264e+06	1.48054e+06	1.57421e+06	1.65686e+06	1.75557e+06	1.85916e+06	2.00624e+06	2.11092e+06	2.28331e+06	2.45089e+06	2.52744e+06	2.59476e+06	2.68672e+06	2.83025e+06	2.87475e+06	2.96592e+06	3.0823e+06	3.22556e+06	3.33279e+06	3.37895e+06	3.49152e+06	3.64824e+06	3.88867e+06	3.94438e+06	3.97571e+06	3.99371e+06	4.00589e+06	4.01334e+06	4.0476e+06	4.25877e+06	4.44892e+06
7	SIB	2	59	0.0770937	1.25667e+06	1.22758e+06	1.12239e+06	1.06018e+06	1.16305e+06	1.23059e+06	1.22707e+06	1.21793e+06	1.23991e+06	1.27138e+06	1.2786e+06	1.34666e+06	1.34729e+06	1.41456e+06	1.46676e+06	1.57903e+06	1.61671e+06	1.66452e+06	1.82179e+06	1.92281e+06	2.04975e+06	2.13495e+06	2.34752e+06	2.50334e+06	2.60895e+06	2.72268e+06	2.78386e+06	2.87322e+06	2.94029e+06	3.02267e+06	3.05936e+06	3.2548e+06	3.31492e+06	3.38411e+06	3.47225e+06	3.64819e+06	3.86512e+06	3.93692e+06	3.96098e+06	3.98371e+06	3.98118e+06	4.04265e+06	4.09573e+06	4.21827e+06	4.47585e+06
8	SIB	2	47	0.0773196	1.36576e+06	1.31903e+06	1.27271e+06	1.24369e+06	1.27879e+06	1.23961e+06	1.30008e+06	1.36343e+06	1.33538e+06	1.40263e+06	1.48223e+06	1.45942e+06	1.51302e+06	1.58246e+06	1.68681e+06	1.72127e+06	1.82184e+06	1.86829e+06	1.9501e+06	2.09177e+06	2.22606e+06	2.32256e+06	2.4764e+06	2.63303e+06	2.78316e+06	2.8434e+06	2.85678e+06	3.10625e+06	3.12791e+06	3.18091e+06	3.25825e+06	3.31344e+06	3.50525e+06	3.59179e+06	3.63618e+06	3.82461e+06	3.92679e+06	4.04076e+06	4.16244e+06	4.20953e+06	4.20367e+06	4.26583e+06	4.35718e+06	4.57005e+06	4.76825e+06
9	SIB	2	62	0.0913573	1.20543e+06	1.12671e+06	1.06511e+06	1.0686e+06	1.05285e+06	1.081e+06	1.08857e+06	1.13382e+06	1.12651e+06	1.14122e+06	1.21219e+06	1.24306e+06	1.26872e+06	1.29154e+06	1.40467e+06	1.42299e+06	1.51435e+06	1.53161e+06	1.67395e+06	1.78593e+06	1.89726e+06	2.00304e+06	2.17678e+06	2.37129e+06	2.44701e+06	2.50586e+06	2.59289e+06	2.67041e+06	2.81627e+06	2.82109e+06	2.90937e+06	3.07554e+06	3.19262e+06	3.24051e+06	3.35163e+06	3.47855e+06	3.65302e+06	3.81725e+06	3.83052e+06	3.81276e+06	3.79668e+06	3.83472e+06	3.88169e+06	4.04771e+06	4.24208e+06
10	SIB	2	57	0.0944855	1.23082e+06	1.15901e+06	1.04268e+06	1.10205e+06	1.09681e+06	1.06912e+06	1.11855e+06	1.13666e+06	1.14634e+06	1.16419e+06	1.24608e+06	1.299e+06	1.27838e+06	1.29603e+06	1.37969e+06	1.45742e+06	1.49779e+06	1.57223e+06	1.66962e+06	1.78252e+06	1.87849e+06	1.96445e+06	2.09408e+06	2.28073e+06	2.33444e+06	2.35457e+06	2.53203e+06	2.65699e+06	2.80051e+06	2.84479e+06	2.90247e+06	3.03291e+06	3.17739e+06	3.17905e+06	3.20801e+06	3.31142e+06	3.44917e+06	3.58472e+06	3.67231e+06	3.63818e+06	3.7138e+06	3.81416e+06	3.84377e+06	3.97724e+06	4.13294e+06
11	SIB	1	58	0.104048	1.43929e+06	1.32069e+06	1.21458e+06	1.2376e+06	1.2676e+06	1.26656e+06	1.28773e+06	1.29531e+06	1.33664e+06	1.38381e+06	1.45406e+06	1.4523e+06	1.44661e+06	1.54025e+06	1.61327e+06	1.69673e+06	1.82879e+06	1.87638e+06	2.001e+06	2.10883e+06	2.2572e+06	2.36289e+06	2.53575e+06	2.72802e+06	2.79043e+06	2.89169e+06	3.0043e+06	3.08305e+06	3.21075e+06	3.27703e+06	3.42069e+06	3.56152e+06	3.70477e+06	3.69828e+06	3.87354e+06	4.04045e+06	4.26467e+06	4.31589e+06	4.35084e+06	4.31717e+06	4.34153e+06	4.33329e+06	4.4498e+06	4.65679e+06	4.82902e+06
12	SIB	1	58	0.104048	1.18676e+06	1.22013e+06	1.09226e+06	1.08359e+06	1.07003e+06	1.1668e+06	1.13546e+06	1.15635e+06	1.18318e+06	1.23317e+06	1.2425e+06	1.34065e+06	1.30942e+06	1.38282e+06	1.42811e+06	1.49782e+06	1.51779e+06	1.65956e+06	1.79569e+06	1.90027e+06	1.9989e+06	2.13798e+06	2.23505e+06	2.41747e+06	2.5775e+06	2.62376e+06	2.69101e+06	2.8213e+06	2.94955e+06	2.92345e+06	3.04231e+06	3.18739e+06	3.29977e+06	3.32488e+06	3.42267e+06	3.57202e+06	3.69993e+06	3.82432e+06	3.90521e+06	3.86018e+06	3.89678e+06	3.94329e+06	4.02475e+06	4.20267e+06	4.43076e+06
13	SIB	1	46	0.109609	1.2966e+06	1.21842e+06	1.24024e+06	1.14971e+06	1.1749e+06	1.213e+06	1.23884e+06	1.2416e+06	1.26061e+06	1.29364e+06	1.35698e+06	1.37614e+06	1.46373e+06	1.48085e+06	1.54821e+06	1.5949e+06	1.6764e+06	1.74792e+06	1.86714e+06	2.0304e+06	2.09594e+06	2.18374e+06	2.39195e+06	2.55564e+06	2.65535e+06	2.73313e+06	2.85338e+06	2.95617e+06	3.08121e+06	3.155e+06	3.27678e+06	3.39004e+06	3.49802e+06	3.55047e+06	3.60315e+06	3.81607e+06	3.97274e+06	4.06436e+06	4.1544e+06	4.06148e+06	4.07689e+06	4.16159e+06	4.22414e+06	4.42221e+06	4.57144e+06
14	SIB	1	53	0.120909	1.45653e+06	1.35558e+06	1.25277e+06	1.22568e+06	1.24312e+06	1.28342e+06	1.35463e+06	1.33466e+06	1.35401e+06	1.36799e+06	1.41401e+06	1.4075e+06	1.48761e+06	1.55766e+06	1.68115e+06	1.71221e+06	1.80792e+06	1.81003e+06	2.01786e+06	2.1156e+06	2.2387e+06	2.26657e+06	2.46071e+06	2.61851e+06	2.71305e+06	2.79967e+06	2.87623e+06	3.15617e+06	3.20276e+06	3.28514e+06	3.37612e+06	3.55705e+06	3.69987e+06	3.65976e+06	3.7241e+06	3.86683e+06	4.04698e+06	4.17859e+06	4.24607e+06	4.27816e+06	4.36042e+06	4.37318e+06	4.43505e+06	4.55106e+06	4.75939e+06
15	SIB	2	64	0.128424	1.32115e+06	1.24748e+06	1.17162e+06	1.16864e+06	1.17785e+06	1.08204e+06	1.24845e+06	1.20502e+06	1.18732e+06	1.27943e+06	1.3595e+06	1.38383e+06	1.41787e+06	1.4386e+06	1.51113e+06	1.54562e+06	1.66219e+06	1.78484e+06	1.83486e+06	1.96086e+06	2.06258e+06	2.218e+06	2.36627e+06	2.54302e+06	2.67348e+06	2.77631e+06	2.80499e+06	2.93777e+06	3.01118e+06	3.13308e+06	3.15207e+06	3.31532e+06	3.46431e+06	3.52776e+06	3.56502e+06	3.72764e+06	3.98078e+06	4.08054e+06	4.17334e+06	4.12517e+06	4.09832e+06	4.10532e+06	4.19269e+06	4.41321e+06	4.60031e+06
16	SIB	2	64	0.128424	1.23262e+06	1.11137e+06	1.09512e+06	1.11215e+06	1.04281e+06	1.08957e+06	1.05161e+06	1.10382e+06	1.17892e+06	1.13208e+06	1.15025e+06	1.20042e+06	1.29323e+06	1.3597e+06	1.36214e+06	1.46726e+06	1.51558e+06	1.58503e+06	1.72979e+06	1.82578e+06	1.93805e+06	2.06775e+06	2.23158e+06	2.30873e+06	2.39678e+06	2.60102e+06	2.56967e+06	2.71306e+06	2.83943e+06	2.89057e+06	3.00061e+06	3.18505e+06	3.24877e+06	3.31156e+06	3.3707e+06	3.53787e+06	3.74694e+06	3.83423e+06	3.84369e+06	3.85802e+06	3.85822e+06	3.87875e+06	3.92453e+06	4.14044e+06	4.30121e+06
17	SIB	2	58	0.136973	1.28885e+06	1.25295e+06	1.19901e+06	1.1152e+06	1.14749e+06	1.10576e+06	1.15184e+06	1.22553e+06	1.18545e+06	1.26779e+06	1.31645e+06	1.34659e+06	1.33169e+06	1.42558e+06	1.50601e+06	1.50938e+06	1.62092e+06	1.6676e+06	1.78312e+06	1.9377e+06	2.03163e+06	2.1317e+06	2.30537e+06	2.37548e+06	2.4948e+06	2.55084e+06	2.69128e+06	2.80675e+06	2.87931e+06	2.92601e+06	3.02974e+06	3.15408e+06	3.28055e+06	3.34184e+06	3.40713e+06	3.54115e+06	3.76869e+06	3.8693e+06	3.90379e+06	3.91646e+06	3.89812e+06	3.95046e+06	4.10065e+06	4.14573e+06	4.37146e+06
18	SIB	2	58	0.136973	1.3962e+06	1.34349e+06	1.27654e+06	1.25837e+06	1.29284e+06	1.27941e+06	1.28341e+06	1.33409e+06	1.39589e+06	1.38315e+06	1.45516e+06	1.46112e+06	1.52288e+06	1.60921e+06	1.6295e+06	1.65177e+06	1.74855e+06	1.91294e+06	1.96695e+06	2.06729e+06	2.17998e+06	2.32479e+06	2.5109e+06	2.66596e+06	2.70624e+06	2.82242e+06	2.92859e+06	3.10034e+06	3.1742e+06	3.23181e+06	3.29703e+06	3.40354e+06	3.61e+06	3.61338e+06	3.63831e+06	3.85727e+06	4.04853e+06	4.14877e+06	4.20011e+06	4.26617e+06	4.21176e+06	4.21977e+06	4.33483e+06	4.47936e+06	4.71144e+06
19	SIB	2	48	0.139915	1.40603e+06	1.30161e+06	1.25165e+06	1.28354e+06	1.23961e+06	1.29594e+06	1.30808e+06	1.3247e+06	1.34627e+06	1.41539e+06	1.48872e+06	1.48388e+06	1.48086e+06	1.61738e+06	1.6725e+06	1.75369e+06	1.8048e+06	1.89403e+06	1.98933e+06	2.18285e+06	2.26381e+06	2.35836e+06	2.48818e+06	2.59967e+06	2.68643e+06	2.81408e+06	2.93599e+06	3.16183e+06	3.27772e+06	3.3149e+06	3.44365e+06	3.61483e+06	3.76345e+06	3.72698e+06	3.80583e+06	3.90694e+06	4.11157e+06	4.18763e+06	4.283e+06	4.32226e+06	4.36401e+06	4.43235e+06	4.50477e+06	4.60489e+06	4.83344e+06
20	SIB	2	45	0.139915	1.41487e+06	1.317e+06	1.32749e+06	1.28836e+06	1.29964e+06	1.30337e+06	1.39022e+06	1.33578e+06	1.39764e+06	1.466e+06	1.524e+06	1.50676e+06	1.62176e+06	1.60767e+06	1.71581e+06	1.79791e+06	1.86661e+06	1.96405e+06	2.09057e+06	2.18223e+06	2.28968e+06	2.37662e+06	2.52456e+06	2.63596e+06	2.76198e+06	2.89887e+06	3.00942e+06	3.23473e+06	3.38494e+06	3.45507e+06	3.54992e+06	3.7876e+06	3.85967e+06	3.88164e+06	3.89436e+06	4.00608e+06	4.12192e+06	4.27401e+06	4.35279e+06	4.40031e+06	4.46374e+06	4.51074e+06	4.6021e+06	4.74427e+06	4.86865e+06
21	SIB	2	52	0.151091	1.57743e+06	1.53597e+06	1.4778e+06	1.4896e+06	1.4845e+06	1.51744e+06	1.51506e+06	1.5719e+06	1.61931e+06	1.68462e+06	1.6812e+06	1.71798e+06	1.79396e+06	1.8989e+06	1.92743e+06	2.01753e+06	2.18979e+06	2.2048e+06	2.35946e+06	2.52365e+06	2.64653e+06	2.82926e+06	3.09283e+06	3.2263e+06	3.39649e+06	3.52145e+06	3.55021e+06	3.67856e+06	3.73967e+06	3.77787e+06	3.88869e+06	4.04749e+06	4.20964e+06	4.37751e+06	4.49163e+06	4.74804e+06	4.87797e+06	5.06141e+06	5.10514e+06	5.08611e+06	5.10687e+06	5.08883e+06	5.28184e+06	5.45726e+06	5.6968e+06
22	SIB	1	49	0.154069	1.29838e+06	1.28482e+06	1.19333e+06	1.20984e+06	1.22944e+06	1.2155e+06	1.20074e+06	1.24213e+06	1.30734e+06	1.31162e+06	1.33146e+06	1.38597e+06	1.44326e+06	1.53677e+06	1.58413e+06	1.6444e+06	1.73661e+06	1.78423e+06	1.93245e+06	2.01995e+06	2.1776e+06	2.22357e+06	2.43937e+06	2.60892e+06	2.71465e+06	2.79683e+06	2.91397e+06	3.06553e+06	3.1885e+06	3.20758e+06	3.34247e+06	3.50307e+06	3.59687e+06	3.62884e+06	3.68021e+06	3.81905e+06	4.05316e+06	4.22108e+06	4.19432e+06	4.30635e+06	4.30546e+06	4.31615e+06	4.37834e+06	4.49078e+06	4.74755e+06
23	SIB	1	53	0.154069	1.39576e+06	1.30005e+06	1.30937e+06	1.27597e+06	1.24665e+06	1.28942e+06	1.28469e+06	1.34642e+06	1.37386e+06	1.40928e+06	1.4329e+06	1.47447e+06	1.55947e+06	1.60393e+06	1.7045e+06	1.81023e+06	1.80162e+06	1.88298e+06	2.04097e+06	2.16103e+06	2.26388e+06	2.39546e+06	2.56729e+06	2.70388e+06	2.78543e+06	2.89419e+06	3.00224e+06	3.23473e+06	3.3011e+06	3.42053e+06	3.48875e+06	3.65578e+06	3.72842e+06	3.73514e+06	3.83216e+06	3.9677e+06	4.11679e+06	4.22846e+06	4.30627e+06	4.37394e+06	4.378e+06	4.47671e+06	4.52545e+06	4.70784e+06	4.89473e+06
24	SIB	2	47	0.157869	1.33039e+06	1.26507e+06	1.26931e+06	1.23051e+06	1.24116e+06	1.27753e+06	1.25561e+06	1.27505e+06	1.3414e+06	1.3485e+06	1.43468e+06	1.40458e+06	1.47284e+06	1.56157e+06	1.61464e+06	1.73034e+06	1.77173e+06	1.82819e+06	1.93268e+06	2.09002e+06	2.2082e+06	2.28966e+06	2.43666e+06	2.62487e+06	2.70118e+06	2.75777e+06	2.84031e+06	2.99007e+06	3.14091e+06	3.17214e+06	3.26141e+06	3.40191e+06	3.49986e+06	3.56437e+06	3.63798e+06	3.84331e+06	4.06831e+06	4.11451e+06	4.19964e+06	4.18283e+06	4.20207e+06	4.19224e+06	4.31177e+06	4.41744e+06	4.63671e+06
25	SIB	2	53	0.157869	1.38365e+06	1.37599e+06	1.25914e+06	1.23175e+06	1.2957e+06	1.2358e+06	1.31518e+06	1.30445e+06	1.33104e+06	1.39052e+06	1.3887e+06	1.46026e+06	1.50364e+06	1.56176e+06	1.62147e+06	1.74858e+06	1.81531e+06	1.88239e+06	2.03066e+06	2.12368e+06	2.23358e+06	2.29723e+06	2.5132e+06	2.59612e+06	2.70661e+06	2.79996e+06	2.95082e+06	3.08917e+06	3.24591e+06	3.27839e+06	3.43858e+06	3.56898e+06	3.7164e+06	3.70825e+06	3.75489e+06	3.87796e+06	4.03998e+06	4.14104e+06	4.21447e+06	4.22107e+06	4.31397e+06	4.33534e+06	4.46032e+06	4.56414e+06	4.74059e+06
26	SIB	1	57	0.162795	1.3614e+06	1.33906e+06	1.28919e+06	1.28473e+06	1.31821e+06	1.31425e+06	1.32902e+06	1.35244e+06	1.41655e+06	1.40317e+06	1.49258e+06	1.53364e+06	1.55938e+06	1.62062e+06	1.6614e+06	1.8058e+06	1.83881e+06	1.94103e+06	2.06061e+06	2.13849e+06	2.34257e+06	2.44445e+06	2.56035e+06	2.78272e+06	2.94344e+06	2.99209e+06	3.07927e+06	3.15724e+06	3.29589e+06	3.38387e+06	3442416	3.55227e+06	3.67204e+06	3.73796e+06	3.86696e+06	4.0489e+06	4.26049e+06	4.36165e+06	4.44694e+06	4.50118e+06	4.53046e+06	4.49829e+06	4.63194e+06	4.71789e+06	4.947e+06
27	SIB	1	62	0.173294	1.30556e+06	1.22061e+06	1.15312e+06	1.19856e+06	1.16158e+06	1.15679e+06	1.18213e+06	1.23422e+06	1.25697e+06	1.30778e+06	1.33124e+06	1.33779e+06	1.38902e+06	1.47131e+06	1.52252e+06	1.59278e+06	1.68454e+06	1.7434e+06	1.8224e+06	1.99272e+06	2.10278e+06	2.20404e+06	2.38487e+06	2.5213e+06	2.6502e+06	2.78456e+06	2.82652e+06	2.99085e+06	3.07553e+06	3.12156e+06	3.22867e+06	3.35619e+06	3.47654e+06	3.49398e+06	3.62846e+06	3.75773e+06	3.98506e+06	4.09268e+06	4.15268e+06	4.12622e+06	4.18427e+06	4.19336e+06	4.27957e+06	4.44941e+06	4.69278e+06
28	SIB	2	50	0.173629	1.53854e+06	1.42173e+06	1.34915e+06	1.34733e+06	1.41087e+06	1.35419e+06	1.39818e+06	1.46956e+06	1.4447e+06	1.49149e+06	1.57277e+06	1.59504e+06	1.58579e+06	1.66149e+06	1.79102e+06	1.8644e+06	1.95467e+06	2.03004e+06	2.11797e+06	2.22327e+06	2.43453e+06	2.57872e+06	2.72289e+06	2.8739e+06	2.96439e+06	3.06788e+06	3.16899e+06	3.3534e+06	3.43601e+06	3.46971e+06	3.60968e+06	3.82446e+06	3.92207e+06	3.9953e+06	4.06553e+06	4.23955e+06	4.45141e+06	4.5548e+06	4.64731e+06	4.63525e+06	4.58396e+06	4.67916e+06	4.80731e+06	4.9067e+06	5.17845e+06
29	SIB	1	56	0.184825	1.23328e+06	1.23197e+06	1.21957e+06	1.15683e+06	1.13968e+06	1.1561e+06	1.16397e+06	1.22639e+06	1.25145e+06	1.22041e+06	1.23122e+06	1.28179e+06	1.35857e+06	1.43051e+06	1.51552e+06	1.56883e+06	1.6146e+06	1.71717e+06	1.82542e+06	1.95199e+06	2.03809e+06	2.12571e+06	2.27237e+06	2.36092e+06	2.50861e+06	2.53746e+06	2.70136e+06	2.8377e+06	2.94443e+06	3.03323e+06	3.15578e+06	3.31448e+06	3.4185e+06	3.34765e+06	3.42093e+06	3.56031e+06	3.7183e+06	3.84486e+06	3.93672e+06	3.95758e+06	4.09729e+06	4.08599e+06	4.17802e+06	4.29228e+06	4.46967e+06
30	SIB	1	56	0.195484	1.37871e+06	1.34799e+06	1.29367e+06	1.32433e+06	1.29272e+06	1.33351e+06	1.3366e+06	1.37156e+06	1.42303e+06	1.43686e+06	1.4207e+06	1.4546e+06	1.55685e+06	1.59657e+06	1.62162e+06	1.7384e+06	1.85155e+06	1.88397e+06	2.0278e+06	2.13881e+06	2.23446e+06	2.38112e+06	2.56457e+06	2.65412e+06	2.81805e+06	2.82671e+06	2.93952e+06	3.08318e+06	3.23988e+06	3.30256e+06	3.37145e+06	3.51939e+06	3.67484e+06	3.65752e+06	3.75951e+06	3.88227e+06	4.0921e+06	4.17734e+06	4.25421e+06	4.27082e+06	4.24855e+06	4.32302e+06	4.4325e+06	4.61311e+06	4.71087e+06
31	SIB	1	75	0.201837	1.24038e+06	1.17276e+06	1.13167e+06	1.12184e+06	1.12043e+06	1.10467e+06	1.19058e+06	1.16193e+06	1.17577e+06	1.28136e+06	1.25906e+06	1.25334e+06	1.30735e+06	1.34147e+06	1.48159e+06	1.51224e+06	1.62737e+06	1.6869e+06	1.76561e+06	1.91475e+06	2.00413e+06	2.16159e+06	2.28172e+06	2.38245e+06	2.49141e+06	2.59e+06	2.73102e+06	2.85165e+06	2.98773e+06	3.06469e+06	3.11955e+06	3.32273e+06	3.38275e+06	3.38446e+06	3.43841e+06	3.58209e+06	3.78059e+06	3.90587e+06	3.93804e+06	3.98114e+06	3.97306e+06	4.04969e+06	4.10871e+06	4.25801e+06	4.505e+06
32	SIB	1	45	0.203865	1.39004e+06	1.2905e+06	1.25011e+06	1.21483e+06	1.24818e+06	1.23595e+06	1.27545e+06	1.31874e+06	1.27133e+06	1.40622e+06	1.41325e+06	1.42553e+06	1.48596e+06	1.52449e+06	1.67232e+06	1.71445e+06	1.77146e+06	1.84286e+06	1.93725e+06	2.08559e+06	2.21968e+06	2.3386e+06	2.50143e+06	2.63421e+06	2.77898e+06	2.85821e+06	2.98728e+06	3.15625e+06	3.21595e+06	3.20741e+06	3.35779e+06	3.46151e+06	3.60861e+06	3.70764e+06	3.74348e+06	3.94707e+06	4.15802e+06	4.25948e+06	4.3107e+06	4.34536e+06	4.32813e+06	4.36825e+06	4.45659e+06	4.57764e+06	4.8328e+06
33	SIB	1	51	0.203865	1.21844e+06	1.09419e+06	1.09288e+06	1.05147e+06	1.07267e+06	1.04006e+06	1.06766e+06	1.10946e+06	1.16827e+06	1.16128e+06	1.22314e+06	1.26841e+06	1.28192e+06	1.36932e+06	1.40739e+06	1.46079e+06	1.53669e+06	1.56924e+06	1.70307e+06	1.81586e+06	1.91023e+06	2.05523e+06	2.21736e+06	2.38681e+06	2.49982e+06	2.54139e+06	2.6344e+06	2.78225e+06	2.86171e+06	2.8983e+06	2.91893e+06	3.07269e+06	3.19015e+06	3.29875e+06	3.35462e+06	3.54633e+06	3.7071e+06	3.7416e+06	3.86204e+06	3.84622e+06	3.8694e+06	3.91349e+06	3.96298e+06	4.08152e+06	4.30216e+06
34	SIB	2	59	0.209976	1.28002e+06	1.17698e+06	1.14784e+06	1.12829e+06	1.1257e+06	1.16292e+06	1.18197e+06	1.20261e+06	1.17534e+06	1.25312e+06	1.27838e+06	1.32179e+06	1.33678e+06	1.39576e+06	1.50913e+06	1.54457e+06	1.60725e+06	1.7355e+06	1.74817e+06	1.89764e+06	2.04071e+06	2.12778e+06	2.36241e+06	2.59295e+06	2.66274e+06	2.68133e+06	2.75253e+06	2.86687e+06	2.91956e+06	3.01925e+06	3.07267e+06	3.17742e+06	3.32193e+06	3.38955e+06	3.51313e+06	3.73571e+06	3.88735e+06	4.00223e+06	4.0502e+06	4.01551e+06	4.01236e+06	4.0455e+06	4.12662e+06	4.42252e+06	4.54507e+06
35	SIB	2	59	0.213856	1.39933e+06	1.37828e+06	1.25492e+06	1.27956e+06	1.32394e+06	1.3493e+06	1.37556e+06	1.40772e+06	1.41222e+06	1.45536e+06	1.49787e+06	1.52358e+06	1.61175e+06	1.70994e+06	1.73204e+06	1.78213e+06	1.89614e+06	2.01163e+06	2.16083e+06	2.22983e+06	2.32227e+06	2.48739e+06	2.70162e+06	2.90163e+06	3.01585e+06	3.07276e+06	3.21454e+06	3.22409e+06	3.34356e+06	3.43914e+06	3.46187e+06	3.58735e+06	3.76785e+06	3.85778e+06	4.00699e+06	4.15482e+06	4.33647e+06	4.52243e+06	4.54882e+06	4.50475e+06	4.55639e+06	4.54453e+06	4.65473e+06	4.80865e+06	5.03315e+06
36	SIB	2	64	0.228081	1.38979e+06	1.31441e+06	1.23741e+06	1.26172e+06	1.22915e+06	1.30658e+06	1.26381e+06	1.29555e+06	1.35205e+06	1.36034e+06	1.44658e+06	1.53015e+06	1.55209e+06	1.58035e+06	1.67221e+06	1.7436e+06	1.77273e+06	1.83448e+06	1.98568e+06	2.1157e+06	2.18073e+06	2.33078e+06	2.54898e+06	2.71615e+06	2.80745e+06	2.90701e+06	3.04803e+06	3.14069e+06	3.3e+06	3.28412e+06	3.39339e+06	3.55933e+06	3.64894e+06	3.75407e+06	3.78955e+06	3.95728e+06	4.188e+06	4.21827e+06	4.31411e+06	4.35396e+06	4.35191e+06	4.40031e+06	4.45826e+06	4.63451e+06	4.85907e+06
37	SIB	2	56	0.230925	1.28736e+06	1.24938e+06	1.15449e+06	1.14399e+06	1.15059e+06	1.14269e+06	1.16265e+06	1.15911e+06	1.2259e+06	1.32891e+06	1.27793e+06	1.31786e+06	1.36279e+06	1.35981e+06	1.44442e+06	1.56807e+06	1.5674e+06	1.5849e+06	1.76667e+06	1.85843e+06	2.06386e+06	2.13355e+06	2.26207e+06	2.41004e+06	2.50236e+06	2.54497e+06	2.61516e+06	2.75562e+06	2.86461e+06	2.90683e+06	2.99607e+06	3.21132e+06	3.31846e+06	3.35675e+06	3.39814e+06	3.58929e+06	3.70889e+06	3.82242e+06	3.87175e+06	3.87558e+06	3.84075e+06	3.87122e+06	3.94356e+06	4.09094e+06	4.30091e+06
38	SIB	1	54	0.240988	1.36399e+06	1.33522e+06	1.23186e+06	1.24519e+06	1.27833e+06	1.19046e+06	1.23338e+06	1.29736e+06	1.33337e+06	1.33671e+06	1.38653e+06	1.45322e+06	1.50764e+06	1.49501e+06	1.61009e+06	1.65662e+06	1.7024e+06	1.82333e+06	1.92444e+06	2.07625e+06	2.21609e+06	2.3409e+06	2.49632e+06	2.62584e+06	2.70718e+06	2.7732e+06	2.91477e+06	3.11674e+06	3.21385e+06	3.27532e+06	3.3737e+06	3.55606e+06	3.66508e+06	3.68824e+06	3.735e+06	3.87719e+06	4.07086e+06	4.18567e+06	4.24629e+06	4.31017e+06	4.32854e+06	4.30448e+06	4.4539e+06	4.558e+06	4.73619e+06
39	SIB	2	55	0.246452	1.35355e+06	1.26591e+06	1.24018e+06	1.1688e+06	1.19092e+06	1.19759e+06	1.23447e+06	1.26555e+06	1.22483e+06	1.3029e+06	1.39057e+06	1.41666e+06	1.41248e+06	1.49863e+06	1.56296e+06	1.64943e+06	1.72604e+06	1.7973e+06	1.95642e+06	2.12491e+06	2.18976e+06	2.34076e+06	2.45799e+06	2.63213e+06	2.80812e+06	2.83438e+06	2.99733e+06	3.12218e+06	3.26357e+06	3.27703e+06	3.3794e+06	3.63023e+06	3.75105e+06	3.80815e+06	3.83008e+06	3.97421e+06	4.24798e+06	4.32836e+06	4.35995e+06	4.3759e+06	4.39529e+06	4.45342e+06	4.51705e+06	4.68217e+06	4.8561e+06
40	SIB	2	53	0.246452	1.41706e+06	1.38962e+06	1.27524e+06	1.20733e+06	1.29185e+06	1.23539e+06	1.33646e+06	1.32891e+06	1.36403e+06	1.40834e+06	1.40286e+06	1.49597e+06	1.49939e+06	1.56095e+06	1.67035e+06	1.69308e+06	1.78747e+06	1.8684e+06	2.00018e+06	2.1404e+06	2.24321e+06	2.32285e+06	2.52574e+06	2.68253e+06	2.76013e+06	2.8779e+06	2.98019e+06	3.15827e+06	3.29384e+06	3.31797e+06	3.47857e+06	3.63315e+06	3.77234e+06	3.75025e+06	3.83871e+06	4.01871e+06	4.19771e+06	4.36503e+06	4.41078e+06	4.42274e+06	4.42403e+06	4.43847e+06	4.54238e+06	4.67673e+06	4.86625e+06
41	SIB	2	65	0.251565	1.43121e+06	1.39724e+06	1.32783e+06	1.32934e+06	1.31058e+06	1.34408e+06	1.34619e+06	1.38491e+06	1.39805e+06	1.46304e+06	1.48842e+06	1.53935e+06	1.57596e+06	1.6392e+06	1.76576e+06	1.81981e+06	1.89322e+06	1.93888e+06	2.03642e+06	2.18245e+06	2.29155e+06	2.41547e+06	2.59695e+06	2.74636e+06	2.86511e+06	2.86672e+06	3.01569e+06	3.18138e+06	3.32118e+06	3.33928e+06	3.51091e+06	3.65106e+06	3.76189e+06	3.80822e+06	3.90077e+06	4.01085e+06	4.24046e+06	4.32378e+06	4.35589e+06	4.45669e+06	4.42223e+06	4.47978e+06	4.57913e+06	4.74395e+06	4.95202e+06
42	SIB	2	58	0.259406	1.33035e+06	1.30219e+06	1.22183e+06	1.27589e+06	1.21397e+06	1.19035e+06	1.3081e+06	1.29093e+06	1.32909e+06	1.39201e+06	1.41943e+06	1.44367e+06	1.48471e+06	1.57918e+06	1.61849e+06	1.71655e+06	1.82121e+06	1.80456e+06	1.94445e+06	2.07161e+06	2.21e+06	2.32001e+06	2.54576e+06	2.68858e+06	2.82091e+06	2.89099e+06	2.97101e+06	3.15055e+06	3.20133e+06	3.24867e+06	3.38937e+06	3.54608e+06	3.62349e+06	3.70049e+06	3.78189e+06	3.99894e+06	4.11631e+06	4.23706e+06	4.31522e+06	4.41014e+06	4.37413e+06	4.41827e+06	4.45788e+06	4.64668e+06	4.81124e+06
43	SIB	2	54	0.266116	1.34848e+06	1.27359e+06	1.25799e+06	1.21001e+06	1.23695e+06	1.24324e+06	1.26248e+06	1.29335e+06	1.36014e+06	1.36915e+06	1.38516e+06	1.42022e+06	1.51377e+06	1.5647e+06	1.62568e+06	1.75689e+06	1.78452e+06	1.87404e+06	1.98608e+06	2.11856e+06	2.27279e+06	2.35301e+06	2.54981e+06	2.64674e+06	2.80948e+06	2.90416e+06	2.96104e+06	3.15034e+06	3.2989e+06	3.32024e+06	3.4541e+06	3.59043e+06	3.74031e+06	3.78463e+06	3.84292e+06	4.0391e+06	4.15954e+06	4.34799e+06	4.39786e+06	4.35708e+06	4.45461e+06	4.45079e+06	4.53923e+06	4.69248e+06	4.83308e+06
44	SIB	1	66	0.276982	1.3532e+06	1.28215e+06	1.26863e+06	1.26136e+06	1.25384e+06	1.22302e+06	1.30395e+06	1.27173e+06	1.36954e+06	1.37393e+06	1.39739e+06	1.44114e+06	1.50013e+06	1.50281e+06	1.62141e+06	1.68863e+06	1.76536e+06	1.84949e+06	1.92504e+06	2.0752e+06	2.15798e+06	2.33366e+06	2.51683e+06	2.66594e+06	2.80429e+06	2.88935e+06	2.94019e+06	3.06354e+06	3.1424e+06	3.15972e+06	3.28437e+06	3.42394e+06	3.53967e+06	3.61159e+06	3.71157e+06	3.92519e+06	4.17334e+06	4.22107e+06	4.25207e+06	4.26491e+06	4.26952e+06	4.28708e+06	4.39205e+06	4.56903e+06	4.7553e+06
45	SIB	1	66	0.276982	1.3308e+06	1.20459e+06	1.22131e+06	1.19175e+06	1.21992e+06	1.18455e+06	1.22045e+06	1.26191e+06	1.30761e+06	1.28927e+06	1.36611e+06	1.40362e+06	1.42549e+06	1.52375e+06	1.56492e+06	1.66194e+06	1.70098e+06	1.80003e+06	1.97968e+06	2.06472e+06	2.14175e+06	2.2627e+06	2.4163e+06	2.52788e+06	2.62577e+06	2.71376e+06	2.88685e+06	3.07241e+06	3.23636e+06	3.27705e+06	3.37339e+06	3.52966e+06	3.59893e+06	3.61381e+06	3.62661e+06	3.76337e+06	3.95951e+06	4.09219e+06	4.14216e+06	4.17372e+06	4.20652e+06	4.32556e+06	4.39743e+06	4.47696e+06	4.70826e+06
46	SIB	2	61	0.277173	1.40845e+06	1.25998e+06	1.25685e+06	1.18433e+06	1.21497e+06	1.19885e+06	1.19468e+06	1.27013e+06	1.29936e+06	1.34008e+06	1.35402e+06	1.38821e+06	1.42912e+06	1.53795e+06	1.59168e+06	1.63058e+06	1.76719e+06	1.7997e+06	1.97152e+06	2.0103e+06	2.19423e+06	2.3617e+06	2.5571e+06	2.71142e+06	2.83019e+06	2.912e+06	3.00297e+06	3.14328e+06	3.22223e+06	3.31583e+06	3.36131e+06	3.50137e+06	3.65318e+06	3.66927e+06	3.84121e+06	4.03198e+06	4.20159e+06	4.33025e+06	4.39019e+06	4.41089e+06	4.33834e+06	4.41059e+06	4.52693e+06	4.67563e+06	4.91088e+06
47	SIB	2	63	0.279439	1.52849e+06	1.47627e+06	1.48279e+06	1.48804e+06	1.49874e+06	1.44121e+06	1.50169e+06	1.55003e+06	1.5759e+06	1.62067e+06	1.66814e+06	1.73947e+06	1.82618e+06	1.84556e+06	1.98253e+06	2.02478e+06	2.18216e+06	2.2544e+06	2.36729e+06	2.5589e+06	2.62751e+06	2.83623e+06	3.03202e+06	3.22137e+06	3.3094e+06	3.41394e+06	3.4811e+06	3.63345e+06	3.77121e+06	3.84591e+06	3.88404e+06	4.02054e+06	4.18019e+06	4.26894e+06	4.34579e+06	4.51888e+06	4.71592e+06	4.85372e+06	4.92632e+06	4.87148e+06	4.90273e+06	4.95836e+06	5.04132e+06	5.17294e+06	5.36531e+06
48	SIB	1	44	0.295393	1.36158e+06	1.3731e+06	1.27879e+06	1.26051e+06	1.29341e+06	1.30782e+06	1.33819e+06	1.35477e+06	1.34946e+06	1.40207e+06	1.4684e+06	1.49247e+06	1.54388e+06	1.62098e+06	1.59575e+06	1.75233e+06	1.79265e+06	1.9664e+06	2.0779e+06	2.23707e+06	2.30556e+06	2.42549e+06	2.57778e+06	2.66217e+06	2.76484e+06	2.88932e+06	3.00984e+06	3.2478e+06	3.41152e+06	3.47701e+06	3.60795e+06	3.76373e+06	3.96957e+06	3.90659e+06	3.92696e+06	4.03878e+06	4.23469e+06	4.354e+06	4.47592e+06	4.55419e+06	4.62645e+06	4.62572e+06	4.6935e+06	4.7924e+06	5.0359e+06
49	SIB	1	39	0.295393	1.42579e+06	1.34575e+06	1.29898e+06	1.2818e+06	1.28815e+06	1.27004e+06	1.28727e+06	1.32763e+06	1.33457e+06	1.36416e+06	1.42369e+06	1.50456e+06	1.55667e+06	1.5695e+06	1.64038e+06	1.75234e+06	1.82753e+06	1.93051e+06	2.02244e+06	2.20237e+06	2.33827e+06	2.50756e+06	2.71342e+06	2.84152e+06	2.95197e+06	3.03801e+06	3.12729e+06	3.29405e+06	3.40324e+06	3.38665e+06	3.52537e+06	3.66841e+06	3.83446e+06	3.8691e+06	4.02496e+06	4.20353e+06	4.38707e+06	4.5467e+06	4.55621e+06	4.56133e+06	4.57966e+06	4.56474e+06	4.64745e+06	4.8393e+06	5.07776e+06
50	SIB	2	57	0.301054	1.38389e+06	1.39237e+06	1.37523e+06	1.34084e+06	1.4022e+06	1.3636e+06	1.38765e+06	1.47732e+06	1.47949e+06	1.49927e+06	1.59159e+06	1.6135e+06	1.65885e+06	1.70131e+06	1.83147e+06	1.90961e+06	1.93915e+06	2.04826e+06	2.14568e+06	2.2411e+06	2.4377e+06	2.5365e+06	2.76746e+06	2.93186e+06	3.02863e+06	3.13764e+06	3.1946e+06	3.30878e+06	3.40952e+06	3.48197e+06	3.59825e+06	3.72845e+06	3.90427e+06	3.9204e+06	4.03e+06	4.17032e+06	4.41766e+06	4.46514e+06	4.60288e+06	4.61472e+06	4.68774e+06	4.64842e+06	4.80398e+06	4.93551e+06	5.13773e+06
51	SIB	2	64	0.307875	1.4833e+06	1.42612e+06	1.39667e+06	1.38113e+06	1.39436e+06	1.42465e+06	1.4352e+06	1.50904e+06	1.55574e+06	1.59183e+06	1.62598e+06	1.66241e+06	1.66974e+06	1.83245e+06	1.83946e+06	1.95003e+06	2.01326e+06	2.09923e+06	2.24691e+06	2.37067e+06	2.5026e+06	2.61429e+06	2.76637e+06	2.95215e+06	3.11216e+06	3.10712e+06	3.20266e+06	3.40577e+06	3.41207e+06	3.50269e+06	3.61223e+06	3.75007e+06	3.87772e+06	3.96259e+06	4.08823e+06	4.28535e+06	4.456e+06	4.55036e+06	4.6066e+06	4.69e+06	4.72278e+06	4.74174e+06	4.84528e+06	5.01843e+06	5.24591e+06
52	SIB	1	69	0.308257	1.37655e+06	1.32108e+06	1.30653e+06	1.23007e+06	1.24182e+06	1.19579e+06	1.28205e+06	1.37172e+06	1.37867e+06	1.39482e+06	1.4182e+06	1.46428e+06	1.53651e+06	1.60791e+06	1.64842e+06	1.70667e+06	1.77987e+06	1.8634e+06	1.96039e+06	2.11423e+06	2.19439e+06	2.32551e+06	2.51445e+06	2.64421e+06	2.79105e+06	2.88234e+06	2.93411e+06	3.07832e+06	3.13784e+06	3.19736e+06	3.33996e+06	3.43999e+06	3.50652e+06	3.59914e+06	3.6802e+06	3.89723e+06	4.0294e+06	4.16838e+06	4.15119e+06	4.22029e+06	4.21702e+06	4.34946e+06	4.41398e+06	4.54731e+06	4.71826e+06
53	SIB	2	50	0.308257	1.45463e+06	1.40543e+06	1.2688e+06	1.25274e+06	1.28921e+06	1.33623e+06	1.32821e+06	1.37247e+06	1.41133e+06	1.43588e+06	1.49457e+06	1.52115e+06	1.57569e+06	1.63655e+06	1.68491e+06	1.84537e+06	1.85348e+06	1.96324e+06	2.09167e+06	2.20869e+06	2.264e+06	2.44521e+06	2.58059e+06	2.74043e+06	2.86713e+06	2.97494e+06	3.09144e+06	3.26607e+06	3.37171e+06	3.40456e+06	3.55388e+06	3.75834e+06	3.8239e+06	3.85332e+06	3.98688e+06	4.09922e+06	4.31339e+06	4.40619e+06	4.52949e+06	4.48987e+06	4.54206e+06	4.57231e+06	4.67037e+06	4.80095e+06	5.02548e+06
54	SIB	2	52	0.313343	1.21454e+06	1.18181e+06	1.12804e+06	1.10711e+06	1.08456e+06	1.06756e+06	1.09782e+06	1.18172e+06	1.19669e+06	1.25816e+06	1.24584e+06	1.31805e+06	1.31352e+06	1.41928e+06	1.47686e+06	1.50454e+06	1.53533e+06	1.62217e+06	1.73601e+06	1.90973e+06	2.02354e+06	2.12521e+06	2.26367e+06	2.47613e+06	2.59008e+06	2.6374e+06	2.72031e+06	2.86513e+06	3.00195e+06	2.94743e+06	3.07165e+06	3.19829e+06	3.30591e+06	3.33389e+06	3.49813e+06	3.67437e+06	3.85351e+06	3.96287e+06	3.97536e+06	3.97341e+06	4.01006e+06	4.00167e+06	4.09018e+06	4.22132e+06	4.46452e+06
55	SIB	2	50	0.313343	1.50114e+06	1.44841e+06	1.4443e+06	1.42319e+06	1.47134e+06	1.43112e+06	1.44017e+06	1.47006e+06	1.53036e+06	1.58766e+06	1.61347e+06	1.65568e+06	1.67684e+06	1.78513e+06	1.88511e+06	1.90893e+06	2.03952e+06	2.10566e+06	2.2324e+06	2.3555e+06	2.46844e+06	2.63216e+06	2.76537e+06	2.93979e+06	3.0432e+06	3.17244e+06	3.28904e+06	3.44666e+06	3.5742e+06	3.67511e+06	3.77172e+06	3.90707e+06	4.03875e+06	4.06815e+06	4.18106e+06	4.33486e+06	4.53111e+06	4.64155e+06	4.66919e+06	4.69753e+06	4.76651e+06	4.75236e+06	4.86034e+06	4.9913e+06	5.27378e+06
56	SIB	1	57	0.317247	1.24047e+06	1.19767e+06	1.12897e+06	1.05788e+06	1.14412e+06	1.09242e+06	1.1326e+06	1.1954e+06	1.15022e+06	1.26008e+06	1.25741e+06	1.21119e+06	1.24784e+06	1.36929e+06	1.42695e+06	1.46729e+06	1.56664e+06	1.61515e+06	1.77761e+06	1.87454e+06	1.98541e+06	2.04899e+06	2.19206e+06	2.30609e+06	2.42693e+06	2.44886e+06	2.56862e+06	2.76726e+06	2.88355e+06	2.94662e+06	2.95949e+06	3.17457e+06	3.23161e+06	3.25174e+06	3.2828e+06	3.43856e+06	3.57473e+06	3.70848e+06	3.76646e+06	3.78107e+06	3.80625e+06	3.84577e+06	3.91317e+06	4.05401e+06	4.2639e+06
57	SIB	2	57	0.3277	1.40273e+06	1.37137e+06	1.27689e+06	1.26796e+06	1.29801e+06	1.29255e+06	1.30648e+06	1.35634e+06	1.38439e+06	1.44175e+06	1.4614e+06	1.45437e+06	1.57266e+06	1.61884e+06	1.64549e+06	1.76809e+06	1.82373e+06	1.92341e+06	2.02554e+06	2.12329e+06	2.25622e+06	2.41706e+06	2.60431e+06	2.70854e+06	2.84273e+06	2.94961e+06	3.01899e+06	3.20183e+06	3.33843e+06	3.33549e+06	3.50976e+06	3.6256e+06	3.76243e+06	3.78972e+06	3.872e+06	4.0107e+06	4.12489e+06	4.3022e+06	4.36675e+06	4.39897e+06	4.42309e+06	4.40781e+06	4.52767e+06	4.64778e+06	4.9093e+06
58	SIB	2	32	0.329855	1.32462e+06	1.22082e+06	1.23016e+06	1.22941e+06	1.21462e+06	1.22055e+06	1.27956e+06	1.26314e+06	1.3029e+06	1.34058e+06	1.37692e+06	1.44459e+06	1.44681e+06	1.5743e+06	1.61373e+06	1.71272e+06	1.74369e+06	1.83379e+06	1.90864e+06	2.06147e+06	2.19178e+06	2.30684e+06	2.47154e+06	2.6094e+06	2.76787e+06	2.85673e+06	2.93075e+06	3.04361e+06	3.13863e+06	3.18036e+06	3.2775e+06	3.38142e+06	3.51972e+06	3.6127e+06	3.69095e+06	3.77954e+06	3.96669e+06	4.07571e+06	4.14534e+06	4.16374e+06	4.19002e+06	4.21432e+06	4.31047e+06	4.44427e+06	4.72743e+06
59	SIB	2	50	0.335539	1.3573e+06	1.37016e+06	1.25593e+06	1.25216e+06	1.26338e+06	1.31562e+06	1.30716e+06	1.38638e+06	1.3787e+06	1.42148e+06	1.42183e+06	1.47717e+06	1.50317e+06	1.61267e+06	1.6446e+06	1.78966e+06	1.78605e+06	1.86931e+06	2.01929e+06	2.11272e+06	2.23484e+06	2.31471e+06	2.5076e+06	2.72742e+06	2.78808e+06	2.89069e+06	2.97248e+06	3.11615e+06	3.21366e+06	3.25049e+06	3.37192e+06	3.51008e+06	3.60657e+06	3.70342e+06	3.70635e+06	3.89863e+06	4.08042e+06	4.141e+06	4.2972e+06	4.24911e+06	4.33414e+06	4.27298e+06	4.38977e+06	4.47395e+06	4.6827e+06
60	SIB	2	54	0.341731	1.36771e+06	1.39739e+06	1.35659e+06	1.2982e+06	1.31078e+06	1.3273e+06	1.38966e+06	1.35658e+06	1.3711e+06	1.44081e+06	1.42021e+06	1.54307e+06	1.52272e+06	1.64401e+06	1.67161e+06	1.80787e+06	1.80524e+06	1.97175e+06	2.07467e+06	2.16715e+06	2.33689e+06	2.43635e+06	2.61269e+06	2.85198e+06	2.99226e+06	3.028e+06	3.08122e+06	3.21799e+06	3.24018e+06	3.30226e+06	3.44863e+06	3.58e+06	3.69142e+06	3.79068e+06	3.84924e+06	4.1257e+06	4.316e+06	4.43269e+06	4475816	4.46937e+06	4.49309e+06	4.50067e+06	4.58785e+06	4.72915e+06	4977295
61	SIB	2	52	0.341731	1.34383e+06	1.2812e+06	1.22285e+06	1.24067e+06	1.20038e+06	1.25637e+06	1.23699e+06	1.2429e+06	1.2967e+06	1.29712e+06	1.35406e+06	1.38652e+06	1.44528e+06	1.49785e+06	1.59663e+06	1.61857e+06	1.71508e+06	1.82233e+06	1.90665e+06	2.07371e+06	2.13182e+06	2.26281e+06	2.48912e+06	2.5678e+06	2.6358e+06	2.72344e+06	2.89087e+06	3.02882e+06	3.13762e+06	3.20678e+06	3.29713e+06	3.42247e+06	3.55702e+06	3.598e+06	3.73109e+06	3.84975e+06	4.06815e+06	4.18068e+06	4.15418e+06	4.19893e+06	4.17014e+06	4.25885e+06	4.33541e+06	4.46862e+06	4.64769e+06
62	SIB	2	46	0.341731	1.28085e+06	1.28468e+06	1.23756e+06	1.23473e+06	1.23106e+06	1.22219e+06	1.2359e+06	1.33078e+06	1.31353e+06	1.38526e+06	1.39074e+06	1.46766e+06	1.47948e+06	1.50552e+06	1.61432e+06	1.66752e+06	1.71972e+06	1.813e+06	1.94825e+06	2.03002e+06	2.16176e+06	2.26963e+06	2.45705e+06	2.62971e+06	2.78954e+06	2.79832e+06	2.89714e+06	3.01651e+06	3.06182e+06	3.18247e+06	3.24063e+06	3.31139e+06	3.45159e+06	3.52011e+06	3.59621e+06	3.80405e+06	3.98735e+06	4.10262e+06	4.06782e+06	4.12666e+06	4.13197e+06	4.16365e+06	4.22159e+06	4.41464e+06	4.6409e+06
63	SIB	2	62	0.352373	1.2966e+06	1.25842e+06	1.19742e+06	1.18416e+06	1.18337e+06	1.1666e+06	1.22717e+06	1.24283e+06	1.24346e+06	1.27356e+06	1.38872e+06	1.39144e+06	1.38007e+06	1.4429e+06	1.54256e+06	1.65052e+06	1.72307e+06	1.74286e+06	1.86532e+06	2.01397e+06	2.09711e+06	2.28174e+06	2.44969e+06	2.56338e+06	2.67368e+06	2.73888e+06	2.80232e+06	2.96642e+06	3.03351e+06	3.09355e+06	3.20239e+06	3.34325e+06	3.45378e+06	3.54191e+06	3.595e+06	3.75229e+06	3.99121e+06	4.0806e+06	4.07882e+06	4.14123e+06	4.10211e+06	4.14873e+06	4.25294e+06	4.3114e+06	4.56081e+06
64	SIB	1	57	0.353402	1.28775e+06	1.19609e+06	1.1816e+06	1.15469e+06	1.1526e+06	1.16592e+06	1.17394e+06	1.19848e+06	1.21537e+06	1.27356e+06	1.30829e+06	1.33456e+06	1.36374e+06	1.47889e+06	1.48493e+06	1.62e+06	1.6572e+06	1.7015e+06	1.84847e+06	1.97963e+06	2.00897e+06	2.1161e+06	2.25653e+06	2.4331e+06	2.48614e+06	2.59619e+06	2.6961e+06	2.83721e+06	3.0393e+06	3.05101e+06	3.19928e+06	3.34029e+06	3.43272e+06	3.45628e+06	3.46985e+06	3.58975e+06	3.73089e+06	3.94924e+06	3.95592e+06	4.04447e+06	4.02941e+06	4.10631e+06	4.1916e+06	4.21268e+06	4.42855e+06
65	SIB	2	64	0.355919	1.30379e+06	1.28866e+06	1.20194e+06	1.19042e+06	1.17074e+06	1.15909e+06	1.20036e+06	1.2631e+06	1.29822e+06	1.29305e+06	1.35568e+06	1.43214e+06	1.43411e+06	1.52135e+06	1.52681e+06	1.64161e+06	1.68288e+06	1.80224e+06	1.87126e+06	2.03768e+06	2.12762e+06	2.27742e+06	2.43375e+06	2.53908e+06	2.72915e+06	2.70959e+06	2.86737e+06	2.9839e+06	3.10122e+06	3.15563e+06	3.316e+06	3.49215e+06	3.53132e+06	3.60483e+06	3.6897e+06	3.79137e+06	4.00072e+06	4.07589e+06	4.2014e+06	4.1657e+06	4.19835e+06	4.27318e+06	4.33722e+06	4.43382e+06	4.70947e+06
66	SIB	2	76	0.358757	1.26156e+06	1.17435e+06	1.16599e+06	1.13681e+06	1.14461e+06	1.16916e+06	1.17525e+06	1.23368e+06	1.22914e+06	1.27395e+06	1.32988e+06	1.30711e+06	1.39644e+06	1.45573e+06	1.51653e+06	1.55982e+06	1.66398e+06	1.79724e+06	1.88356e+06	2.01124e+06	2.11505e+06	2.31967e+06	2.50486e+06	2.76182e+06	2.82216e+06	2.84897e+06	2.94312e+06	2.95203e+06	3.07377e+06	3.1176e+06	3.13673e+06	3.32881e+06	3.47176e+06	3.59463e+06	3.73157e+06	3.94274e+06	4.11165e+06	4.25925e+06	4.32613e+06	4.296e+06	4.2388e+06	4.32158e+06	4.38226e+06	4.5421e+06	4.8082e+06
67	SIB	2	65	0.36443	1.27756e+06	1.15916e+06	1.23117e+06	1.196e+06	1.21546e+06	1.1745e+06	1.25242e+06	1.25346e+06	1.3078e+06	1.30846e+06	1.36376e+06	1.43086e+06	1.46081e+06	1517620	1.5969e+06	1.66192e+06	1.76059e+06	1.78553e+06	1.86985e+06	2.05629e+06	2.03959e+06	2.1252e+06	2.29004e+06	2.37701e+06	2.49091e+06	2.57439e+06	2.71328e+06	2.88636e+06	2.97902e+06	3.06807e+06	3.20554e+06	3.32841e+06	3.32721e+06	3.4255e+06	3.42867e+06	3.48792e+06	3.62971e+06	3.74523e+06	3.84162e+06	3.8865e+06	4.00684e+06	4.09425e+06	4.20917e+06	4.33484e+06	4.43727e+06
68	SIB	2	52	0.381316	1.39635e+06	1.37537e+06	1.30624e+06	1.33269e+06	1.26141e+06	1.30593e+06	1.33131e+06	1.31861e+06	1.35924e+06	1.4314e+06	1.48252e+06	1.54722e+06	1.60966e+06	1.61576e+06	1.70544e+06	1.79399e+06	1.83836e+06	1.89565e+06	2.00099e+06	2.16289e+06	2.3512e+06	2.42935e+06	2.61326e+06	2.77848e+06	2.86003e+06	2.97189e+06	3.09157e+06	3.15817e+06	3.3062e+06	3.34894e+06	3.42617e+06	3.5619e+06	3.71186e+06	3.81881e+06	3.849e+06	4.04721e+06	4.23784e+06	4.31405e+06	4.3943e+06	4.47358e+06	4.39409e+06	4.44409e+06	4.52564e+06	4.69269e+06	4.93415e+06
69	SIB	2	80	0.409797	1.37927e+06	1.37476e+06	1.25876e+06	1.23227e+06	1.2644e+06	1.28901e+06	1.3049e+06	1.29461e+06	1.41743e+06	1.34841e+06	1.4415e+06	1.4417e+06	1.51303e+06	1.55973e+06	1.68953e+06	1.70266e+06	1.80755e+06	1.87235e+06	1.95449e+06	2.09676e+06	2.25237e+06	2.34597e+06	2.52243e+06	2.76008e+06	2.87636e+06	2.98219e+06	3.08661e+06	3.13347e+06	3.24413e+06	3.30695e+06	3.40056e+06	3.53411e+06	3.64749e+06	3.70173e+06	3.83692e+06	4.05614e+06	4.24171e+06	4.36862e+06	4.39868e+06	4.41048e+06	4.39947e+06	4.40886e+06	4.47704e+06	4.66254e+06	4.89916e+06
70	SIB	1	49	0.415699	1.28108e+06	1.25713e+06	1.18683e+06	1.16718e+06	1.18317e+06	1.2227e+06	1.23166e+06	1.23892e+06	1.28434e+06	1.29092e+06	1.31061e+06	1.35385e+06	1.4088e+06	1.49566e+06	1.60928e+06	1.59849e+06	1.61279e+06	1.68868e+06	1.94128e+06	2.02538e+06	2.10332e+06	2.22792e+06	2.30868e+06	2.43753e+06	2.51393e+06	2.62383e+06	2.75975e+06	3.02343e+06	3.11846e+06	3.13733e+06	3.23142e+06	3.44537e+06	3.57244e+06	3.5401e+06	3.5855e+06	3.71839e+06	3.84324e+06	3.98195e+06	4.05748e+06	4.13547e+06	4.16826e+06	4.20858e+06	4.30763e+06	4.31593e+06	4.62329e+06
71	SIB	2	48	0.418573	1.36762e+06	1.28933e+06	1.30807e+06	1.32574e+06	1.29749e+06	1.27204e+06	1.3194e+06	1.292e+06	1.38336e+06	1.36288e+06	1.46352e+06	1.49589e+06	1.49907e+06	1.63831e+06	1.66532e+06	1.75011e+06	1.79246e+06	1.88701e+06	2.00869e+06	2.17461e+06	2.25621e+06	2.37616e+06	2.54476e+06	2.66764e+06	2.79705e+06	2.90084e+06	2.98541e+06	3.17987e+06	3.25828e+06	3.31021e+06	3.39039e+06	3.56915e+06	3.6533e+06	3.72462e+06	3.7937e+06	4.01526e+06	4.11743e+06	4.19716e+06	4.26595e+06	4.31026e+06	4.35734e+06	4.42602e+06	4.49444e+06	4.60911e+06	4.86273e+06
72	SIB	1	70	0.426799	1.24013e+06	1.24132e+06	1.13192e+06	1.13487e+06	1.14442e+06	1.15614e+06	1.19617e+06	1.20864e+06	1.21572e+06	1.27087e+06	1.24692e+06	1.36513e+06	1.36353e+06	1.47629e+06	1.47628e+06	1.60693e+06	1.65794e+06	1.75812e+06	1.81244e+06	1.9448e+06	2.0634e+06	2.16283e+06	2.2341e+06	2.40353e+06	2.4522e+06	2.616e+06	2.70098e+06	2.85909e+06	3.03455e+06	3.046e+06	3.24767e+06	3.35054e+06	3.44608e+06	3.48874e+06	3.51947e+06	3.56134e+06	3.78166e+06	3.87623e+06	3.92117e+06	3.98772e+06	4.08461e+06	4.08097e+06	4.17119e+06	4.22578e+06	4.4796e+06
73	SIB	2	65	0.442741	1.45472e+06	1.41259e+06	1.35763e+06	1.37538e+06	1.36252e+06	1.38435e+06	1.37854e+06	1.43179e+06	1.48927e+06	1.53911e+06	1.55127e+06	1.58802e+06	1.69627e+06	1.70711e+06	1.809e+06	1.89089e+06	1.94853e+06	1.99922e+06	2.09476e+06	2.28778e+06	2.37231e+06	2.47336e+06	2.63846e+06	2.77979e+06	2.94499e+06	3.00032e+06	3.1579e+06	3.2362e+06	3.32112e+06	3.44052e+06	3.53949e+06	3.64353e+06	3.79521e+06	3.82512e+06	3.95702e+06	4.08502e+06	4.23822e+06	4.33353e+06	4.44827e+06	4.45126e+06	4.53825e+06	4.51945e+06	4.61622e+06	4.73203e+06	4.93404e+06
74	SIB	1	56	0.444968	1.38065e+06	1.27286e+06	1.2425e+06	1.21652e+06	1.23574e+06	1.21578e+06	1.23466e+06	1.26354e+06	1.35283e+06	1.32643e+06	1.41323e+06	1.41692e+06	1.47607e+06	1.53316e+06	1.58593e+06	1.67604e+06	1.78277e+06	1.84843e+06	1.93329e+06	2.04596e+06	2.21314e+06	2.30028e+06	2.46305e+06	2.57033e+06	2.69606e+06	2.74485e+06	2.88156e+06	3.0319e+06	3.20118e+06	3.24334e+06	3.31141e+06	3.46387e+06	3.6223e+06	3.57444e+06	3.6616e+06	3.8215e+06	4.02264e+06	4.12058e+06	4.20534e+06	4.17847e+06	4.25107e+06	4.21588e+06	4.30966e+06	4.53539e+06	4.66891e+06
75	SIB	1	57	0.450902	1.45295e+06	1.39599e+06	1.31971e+06	1.32261e+06	1.31438e+06	1.34393e+06	1.34004e+06	1.37821e+06	1.44721e+06	1.46875e+06	1.53207e+06	1.55099e+06	1.55768e+06	1.67907e+06	1.73253e+06	1.82019e+06	1.86492e+06	1.9649e+06	2.11482e+06	2.24235e+06	2.40248e+06	2.48319e+06	2.62596e+06	2.81345e+06	2.85157e+06	3.03742e+06	3.11686e+06	3.31866e+06	3.4779e+06	3.49638e+06	3.60652e+06	3.78291e+06	3.85927e+06	3.94709e+06	4.0322e+06	4.18318e+06	4.37804e+06	4.49602e+06	4.56564e+06	4.60212e+06	4.60413e+06	4.66584e+06	4.72143e+06	4.89763e+06	5.10588e+06
76	SIB	2	73	0.455123	1.3419e+06	1.31516e+06	1.28414e+06	1.25182e+06	1.28768e+06	1.31012e+06	1.26592e+06	1.39462e+06	1.40373e+06	1.40667e+06	1.48493e+06	1.51175e+06	1.4551e+06	1.60528e+06	1.67058e+06	1.74929e+06	1.80992e+06	1.89593e+06	1.95038e+06	2.1123e+06	2.18977e+06	2.32699e+06	2.55758e+06	2.69584e+06	2.8146e+06	2.87305e+06	2.95419e+06	3.08563e+06	3.18843e+06	3.24504e+06	3.29882e+06	3.4402e+06	3.54967e+06	3.58312e+06	3.6957e+06	3.87897e+06	4.09978e+06	4.12429e+06	4.2142e+06	4.21798e+06	4.24774e+06	4.25058e+06	4.30679e+06	4.48073e+06	4.67012e+06
77	SIB	1	46	0.460786	1.2351e+06	1.26375e+06	1.15303e+06	1.17917e+06	1.24241e+06	1.15265e+06	1.16284e+06	1.20956e+06	1.2401e+06	1.32518e+06	1.30079e+06	1.34699e+06	1.35389e+06	1.44947e+06	1.53428e+06	1.60534e+06	1.67037e+06	1.79061e+06	1.87377e+06	2.05439e+06	2.15256e+06	2.22005e+06	2.34879e+06	2.47523e+06	2.61676e+06	2.62959e+06	2.81927e+06	2.98844e+06	3.0606e+06	3.14142e+06	3.26962e+06	3.4249e+06	3.57999e+06	3.53428e+06	3.6651e+06	3.8137e+06	4.02871e+06	4.02422e+06	4.13189e+06	4.19449e+06	4.2036e+06	4.2836e+06	4.32692e+06	4.45413e+06	4.74572e+06
78	SIB	1	62	0.479893	1.41012e+06	1.37757e+06	1.23327e+06	1.23684e+06	1.27181e+06	1.27078e+06	1.25348e+06	1.29094e+06	1.39501e+06	1.38034e+06	1.43437e+06	1.41064e+06	1.56762e+06	1.53494e+06	1.61688e+06	1.71529e+06	1.73097e+06	1.83207e+06	1.94248e+06	2.08092e+06	2.18991e+06	2.31035e+06	2.43204e+06	2.51715e+06	2.71896e+06	2.78005e+06	2.97461e+06	3.10642e+06	3.31441e+06	3.30787e+06	3.43953e+06	3.61494e+06	3.71769e+06	3.73004e+06	3.7518e+06	3.91192e+06	4.08431e+06	4.21738e+06	4.27372e+06	4.33808e+06	4.32877e+06	4.40119e+06	4.55183e+06	4.6423e+06	4.86163e+06
79	SIB	1	64	0.479893	1.40254e+06	1.33544e+06	1.30035e+06	1.20701e+06	1.21424e+06	1.23401e+06	1.24491e+06	1.26309e+06	1.28451e+06	1.34583e+06	1.34361e+06	1.37425e+06	1.46192e+06	1.49607e+06	1.55259e+06	1.59544e+06	1.67907e+06	1.75986e+06	1.8665e+06	1.97839e+06	2.13141e+06	2.1993e+06	2.36721e+06	2.60123e+06	2.71233e+06	2.8117e+06	2.86551e+06	3.02522e+06	3.19239e+06	3.15539e+06	3.26184e+06	3.42556e+06	3.55826e+06	3.54177e+06	3.64092e+06	3.82414e+06	3.9983e+06	4.12684e+06	4.19025e+06	4.1805e+06	4.1926e+06	4.23259e+06	4.32781e+06	4.44523e+06	4.67068e+06
80	SIB	2	64	0.480818	1.4909e+06	1.38919e+06	1.34991e+06	1.37093e+06	1.37334e+06	1.37727e+06	1.42636e+06	1.41869e+06	1.48613e+06	1.51494e+06	1.51548e+06	1.58431e+06	1.60944e+06	1.70204e+06	1.73431e+06	1.89839e+06	1.90856e+06	1.93328e+06	2.08018e+06	2.23103e+06	2.35333e+06	2.45287e+06	2.67505e+06	2.81751e+06	2.96157e+06	3.01441e+06	3.1016e+06	3.21218e+06	3.37296e+06	3.35369e+06	3.47739e+06	3.61374e+06	3.71278e+06	3.82019e+06	3.92631e+06	4.08034e+06	4.25844e+06	4.3733e+06	4.39261e+06	4.4931e+06	4.50455e+06	4.5566e+06	4.60024e+06	4.71254e+06	4.95752e+06
81	SIB	2	43	0.480818	1.38418e+06	1.34527e+06	1.31448e+06	1.29766e+06	1.24291e+06	1.2922e+06	1.2553e+06	1.33109e+06	1.33507e+06	1.45016e+06	1.42232e+06	1.49909e+06	1.56416e+06	1.58775e+06	1.6472e+06	1.75874e+06	1.83709e+06	1.93521e+06	2.03376e+06	2.18344e+06	2.26683e+06	2.40753e+06	2.59346e+06	2.78658e+06	2.87302e+06	2.92774e+06	3.09586e+06	3.25142e+06	3.30454e+06	3.37329e+06	3.47302e+06	3.59918e+06	3.72596e+06	3.78879e+06	3.90396e+06	4.05155e+06	4.25664e+06	4.40531e+06	4.42693e+06	4.45872e+06	4.43142e+06	4.46769e+06	4.59198e+06	4.74347e+06	4.90421e+06
82	SIB	2	53	0.480818	1.51783e+06	1.44224e+06	1.34977e+06	1.39082e+06	1.36013e+06	1.34019e+06	1.36017e+06	1.44937e+06	1.50213e+06	1.50219e+06	1.48277e+06	1.59419e+06	1.62745e+06	1.70369e+06	1.79494e+06	1.88114e+06	1.96632e+06	2.00856e+06	2.14111e+06	2.32185e+06	2.46753e+06	2.56555e+06	2.73565e+06	2.8674e+06	2.98926e+06	3.06455e+06	3.23555e+06	3.42596e+06	3558587	3.60686e+06	3.75436e+06	3.91369e+06	4.02643e+06	4.10372e+06	4.11095e+06	4.27534e+06	4.4418e+06	4.58191e+06	4.65701e+06	4.73552e+06	4.78922e+06	4.81228e+06	4.89859e+06	5.10553e+06	5.31694e+06
83	SIB	2	44	0.480818	1.42438e+06	1.35833e+06	1.33207e+06	1.24861e+06	1.35035e+06	1.27569e+06	1.30153e+06	1.31923e+06	1.38265e+06	1.45967e+06	1.50338e+06	1.51476e+06	1.62707e+06	1.63057e+06	1.75604e+06	1.83784e+06	1.82328e+06	1.99784e+06	2.11174e+06	2.29273e+06	2.35008e+06	2.4446e+06	2.52974e+06	2.70692e+06	2.74688e+06	2.8505e+06	3.04766e+06	3.21025e+06	3.37988e+06	3.47089e+06	3.59346e+06	3.70487e+06	3.91142e+06	3.89115e+06	3.93393e+06	3.99527e+06	4.19231e+06	4.34794e+06	4.41834e+06	4.53209e+06	4.59537e+06	4.63946e+06	4.72947e+06	4.8769e+06	4.97626e+06
84	SIB	1	61	0.480818	1.34374e+06	1.33546e+06	1.24469e+06	1.24248e+06	1.27393e+06	1.26725e+06	1.31673e+06	1.32585e+06	1.30907e+06	1.36952e+06	1.41645e+06	1.46475e+06	1.48405e+06	1.58351e+06	1.64104e+06	1.76634e+06	1.84081e+06	1.87662e+06	1.99566e+06	2.13365e+06	2.24216e+06	2.40906e+06	2.54405e+06	2.70697e+06	2.86598e+06	2.89554e+06	3.0426e+06	3.16313e+06	3.31268e+06	3.35866e+06	3.44693e+06	3.6563e+06	3.80393e+06	3.84127e+06	3.8927e+06	4.06598e+06	4.27943e+06	4.35179e+06	4.46035e+06	4.49142e+06	4.42679e+06	4.5428e+06	4.60038e+06	4.79696e+06	4.9966e+06
85	SIB	2	39	0.480818	1.40804e+06	1.38689e+06	1.36991e+06	1.39731e+06	1.3569e+06	1.38514e+06	1.42941e+06	1.46532e+06	1.49254e+06	1.50514e+06	1.5743e+06	1.57381e+06	1.64316e+06	1.67812e+06	1.76248e+06	1.85526e+06	2.01019e+06	2.05106e+06	2.18061e+06	2.35293e+06	2.42752e+06	2.58035e+06	2.72366e+06	2.94109e+06	2.99511e+06	3.12091e+06	3.26654e+06	3.33964e+06	3.54555e+06	3.57619e+06	3.69157e+06	3.83766e+06	3.95582e+06	4.01236e+06	4.13938e+06	4.24004e+06	4.42068e+06	4.55629e+06	4.57047e+06	4.60688e+06	4.60497e+06	4.69254e+06	4.8158e+06	4.91622e+06	5.15374e+06
86	SIB	2	52	0.480818	1.45041e+06	1.42772e+06	1.40769e+06	1.39675e+06	1.33222e+06	1.36956e+06	1.37657e+06	1.4558e+06	1.45902e+06	1.45702e+06	1.55384e+06	1.61051e+06	1.71324e+06	1.72245e+06	1810515	1.92678e+06	1.9559e+06	2.0503e+06	2.16004e+06	2.32191e+06	2.40415e+06	2.57547e+06	2.71143e+06	2.82064e+06	2.9308e+06	2.98266e+06	3.16871e+06	3.30964e+06	3.49701e+06	3.58544e+06	3.73274e+06	3.89366e+06	3.95489e+06	4.02182e+06	4.00713e+06	4.19126e+06	4.40498e+06	4.48974e+06	4.54225e+06	4.5756e+06	4.62674e+06	4.65826e+06	4.74746e+06	4.96677e+06	5.10225e+06
87	SIB	2	34	0.480818	1.38353e+06	1.35447e+06	1.20899e+06	1.31387e+06	1.21836e+06	1.2722e+06	1.25295e+06	1.28797e+06	1.32588e+06	1.37288e+06	1.42502e+06	1.44207e+06	1.54023e+06	1.58236e+06	1.61367e+06	1.76549e+06	1.8024e+06	1.88953e+06	1.9926e+06	2.14538e+06	2.20018e+06	2.27423e+06	2.4175e+06	2.56772e+06	2.62624e+06	2.73331e+06	2.84173e+06	3.03937e+06	3.14247e+06	3.26358e+06	3.3156e+06	3.46627e+06	3.61311e+06	3.67098e+06	3.65499e+06	3.74626e+06	3.92022e+06	4.0861e+06	4.15727e+06	4.21507e+06	4.23668e+06	4.31947e+06	4.37275e+06	4.51513e+06	4.61524e+06
88	SIB	2	54	0.480818	1.48568e+06	1.40097e+06	1.33269e+06	1.29014e+06	1.24637e+06	1.32486e+06	1.39016e+06	1.37477e+06	1.43108e+06	1.46726e+06	1.50844e+06	1.55775e+06	1.65854e+06	1.71352e+06	1.72641e+06	1.87602e+06	1.86388e+06	1.93656e+06	2.15293e+06	2.31636e+06	2.392e+06	2.55582e+06	2.70799e+06	2.86195e+06	3.02697e+06	3.0413e+06	3.18907e+06	3.37907e+06	3.49698e+06	3.56945e+06	3.64692e+06	3.8139e+06	3.93006e+06	3.93894e+06	4.04542e+06	4.28091e+06	4.41712e+06	4.53695e+06	4.61146e+06	4.60792e+06	4.66264e+06	4.70287e+06	4.80547e+06	4.95054e+06	5.15648e+06
89	SIB	1	67	0.491354	1.29192e+06	1.21636e+06	1.19791e+06	1.21218e+06	1.2286e+06	1.20929e+06	1.25175e+06	1.24679e+06	1.28795e+06	1.31751e+06	1.31861e+06	1.38661e+06	1.40931e+06	1.45446e+06	1.56056e+06	1.58683e+06	1.69715e+06	1.81242e+06	1.81597e+06	2.0257e+06	2.10757e+06	2.15728e+06	2.30653e+06	2.47606e+06	2.54222e+06	2.60018e+06	2.75579e+06	2.93013e+06	3.05848e+06	3.13281e+06	3.21991e+06	3.42589e+06	3.52148e+06	3.54511e+06	3.53106e+06	3.69774e+06	3.79618e+06	3.91612e+06	4.00961e+06	4.03826e+06	4.08096e+06	4.17177e+06	4.2351e+06	4.36693e+06	4.52018e+06
90	SIB	1	66	0.491354	1.23102e+06	1.17879e+06	1.13047e+06	1.09384e+06	1.09332e+06	1.11515e+06	1.16452e+06	1.1249e+06	1.19137e+06	1.25354e+06	1.25273e+06	1.27386e+06	1.34547e+06	1.35089e+06	1.38534e+06	1.48554e+06	1.51748e+06	1.61e+06	1.76718e+06	1.8731e+06	1.95039e+06	2.06308e+06	2.22925e+06	2.2808e+06	2.35268e+06	2.49718e+06	2.61173e+06	2.76179e+06	2.87335e+06	2.90658e+06	3.02535e+06	3.16532e+06	3.26021e+06	3.292e+06	3.30935e+06	3.49169e+06	3.65159e+06	3.76712e+06	3.76978e+06	3.76891e+06	3.86939e+06	3.82524e+06	3.99719e+06	4.07296e+06	4.32457e+06
91	SIB	2	63	0.491692	1.67501e+06	1.61963e+06	1.54729e+06	1.5464e+06	1.55209e+06	1.53034e+06	1.57728e+06	1.60509e+06	1.69818e+06	1.66579e+06	1.72455e+06	1.78737e+06	1.87718e+06	1.91566e+06	2.01041e+06	2.08133e+06	2.20997e+06	2.31092e+06	2.45408e+06	2.58691e+06	2.664e+06	2.84764e+06	3.06928e+06	3.23151e+06	3.38389e+06	3.41892e+06	3.57886e+06	3.78625e+06	3.86319e+06	3.9372e+06	4.03566e+06	4.1984e+06	4.37387e+06	4.42838e+06	4.54543e+06	4.77431e+06	4.96033e+06	5.0466e+06	5.08403e+06	5.16455e+06	5.19681e+06	5.20394e+06	5.37108e+06	5.50399e+06	5.74469e+06
92	SIB	1	67	0.495297	1.35644e+06	1.30401e+06	1.24647e+06	1.20726e+06	1.24048e+06	1.24747e+06	1.29007e+06	1.25653e+06	1.36005e+06	1.35303e+06	1.40255e+06	1.41248e+06	1.48707e+06	1.51259e+06	1.59728e+06	1.69638e+06	1.74042e+06	1.80846e+06	1.8689e+06	2.06127e+06	2.07977e+06	2.19786e+06	2.36625e+06	2.46229e+06	2.67491e+06	2.73367e+06	2.86198e+06	2.98294e+06	3.10093e+06	3.18059e+06	3.31575e+06	3.4129e+06	3.46015e+06	3.4759e+06	3.52768e+06	3.63956e+06	3.80496e+06	3.96674e+06	4.06161e+06	4.08997e+06	4.14115e+06	4.16622e+06	4.21631e+06	4.37253e+06	4.52468e+06
93	SIB	2	64	0.500752	1.43816e+06	1.34691e+06	1.35253e+06	1.29788e+06	1.31359e+06	1.3378e+06	1.33838e+06	1.36652e+06	1.39444e+06	1.44857e+06	1.4692e+06	1.49967e+06	1.60184e+06	1.62664e+06	1.7431e+06	1.78733e+06	1.8765e+06	1.90271e+06	2.05184e+06	2.19046e+06	2.37708e+06	2.5292e+06	2.73206e+06	2.86371e+06	3.05334e+06	3.05063e+06	3.11109e+06	3.22649e+06	3.38666e+06	3.43035e+06	3.51245e+06	3.66443e+06	3.83428e+06	3.97178e+06	4.0601e+06	4.25925e+06	4.46127e+06	4.52282e+06	4.63127e+06	4.61338e+06	4.61928e+06	4.6687e+06	4.76604e+06	4.88427e+06	5.17098e+06
94	SIB	2	61	0.500752	1.36717e+06	1.28397e+06	1.18186e+06	1.2365e+06	1.23358e+06	1.21142e+06	1.26355e+06	1.27047e+06	1.30245e+06	1.38239e+06	1.43504e+06	1.39472e+06	1.44021e+06	1.53662e+06	1.59599e+06	1.66414e+06	1.75685e+06	1.86487e+06	2.02589e+06	2.14658e+06	2.19759e+06	2.28388e+06	2.46922e+06	2.53927e+06	2.69586e+06	2.80627e+06	2.89937e+06	3.06633e+06	3.18923e+06	3.31065e+06	3.37166e+06	3.55546e+06	3.72139e+06	3.72005e+06	3.7323e+06	3.85648e+06	4.06436e+06	4.1609e+06	4.28849e+06	4.3095e+06	4.31553e+06	4.28011e+06	4.42007e+06	4.53694e+06	4.81279e+06
95	SIB	2	60	0.500752	1.49855e+06	1.44181e+06	1.31912e+06	1.35643e+06	1.28137e+06	1.32041e+06	1.33061e+06	1.4019e+06	1.42481e+06	1.43037e+06	1.5084e+06	1.53654e+06	1.58277e+06	1.63645e+06	1.71409e+06	1.81628e+06	1.89829e+06	1.96282e+06	2.10018e+06	2.19667e+06	2.38847e+06	2.52529e+06	2.68087e+06	2.79845e+06	2.89725e+06	3.01565e+06	3.13107e+06	3.30313e+06	3.44995e+06	3.52345e+06	3.65246e+06	3.76125e+06	3.86072e+06	3.97639e+06	4.01407e+06	4.21758e+06	4.39835e+06	4.52742e+06	4.56888e+06	4.6264e+06	4.64453e+06	4.71651e+06	4.73702e+06	4.9125e+06	5.10837e+06
96	SIB	2	63	0.500752	1.53198e+06	1.4971e+06	1.4299e+06	1.41064e+06	1.38769e+06	1.39199e+06	1.40567e+06	1.45334e+06	1.47156e+06	1.5071e+06	1.56542e+06	1.64428e+06	1.70253e+06	1.68106e+06	1.83732e+06	1.88746e+06	1.94391e+06	2.05268e+06	2.14812e+06	2.28096e+06	2.45046e+06	2.54168e+06	2.65568e+06	2.8781e+06	2.96217e+06	3.00519e+06	3.15451e+06	3.34053e+06	3.47908e+06	3.51393e+06	3.58293e+06	3.82883e+06	3.92312e+06	3.9383e+06	4.01356e+06	4.1786e+06	4.37071e+06	4.45553e+06	4.5383e+06	4.58417e+06	4.6344e+06	4.63902e+06	4.7133e+06	4.9291e+06	5.12412e+06
97	SIB	1	70	0.529798	1.09707e+06	1.04911e+06	1.00664e+06	995139	1.01395e+06	984330	1.0489e+06	1.05626e+06	1.07928e+06	1.09946e+06	1.06218e+06	1.09801e+06	1.16339e+06	1.303e+06	1.32938e+06	1.35071e+06	1.42205e+06	1.47917e+06	1.5618e+06	1.70471e+06	1.79915e+06	1.89622e+06	2.04837e+06	2.2716e+06	2314070	2.36371e+06	2.4926e+06	2.59595e+06	2.73196e+06	2.7404e+06	2.81666e+06	3.01372e+06	3.07681e+06	3.09689e+06	3.23639e+06	3.38329e+06	3.56337e+06	3.67593e+06	3.70712e+06	3.7134e+06	3.64837e+06	3.68624e+06	3.78499e+06	3.86676e+06	4.03077e+06
98	SIB	2	60	0.544977	1.45199e+06	1.48091e+06	1.36012e+06	1.38591e+06	1.36292e+06	1.40219e+06	1.36522e+06	1.42697e+06	1.40845e+06	1.49379e+06	1.48911e+06	1.57915e+06	1.64383e+06	1.72067e+06	1.79088e+06	1.88327e+06	1.94201e+06	2.04502e+06	2.1048e+06	2.21207e+06	2.35832e+06	2.54391e+06	2.71947e+06	2.92402e+06	3.18416e+06	3.25877e+06	3.39255e+06	3.41531e+06	3.53864e+06	3.60464e+06	3.67515e+06	3.83103e+06	3.95829e+06	4.06061e+06	4.21544e+06	4.41959e+06	4.65388e+06	4.79434e+06	4.81391e+06	4.83619e+06	4.87868e+06	4.8754e+06	5.02987e+06	5.14346e+06	5.35733e+06
99	SIB	1	45	0.564247	1.55465e+06	1.46192e+06	1.41983e+06	1.38141e+06	1.406e+06	1.41717e+06	1.4082e+06	1.45262e+06	1.45984e+06	1.5661e+06	1.603e+06	1.62832e+06	1.65038e+06	1.75823e+06	1.86185e+06	1.88893e+06	1.96538e+06	2.07417e+06	2.1625e+06	2.38216e+06	2.448e+06	2.59516e+06	2.74378e+06	2.90477e+06	2.99319e+06	3.12511e+06	3.23615e+06	3.41474e+06	3.58588e+06	3.5993e+06	3.7255e+06	3.93392e+06	4.08481e+06	4.11373e+06	4.13413e+06	4.32513e+06	4.49213e+06	4.58808e+06	4.66784e+06	4.77548e+06	4.79897e+06	4.84903e+06	4.93974e+06	5.05809e+06	5.32847e+06
100	SIB	1	48	0.564247	1.58017e+06	1.49037e+06	1.52072e+06	1.45999e+06	1.42299e+06	1.5043e+06	1.52052e+06	1.5593e+06	1.5604e+06	1.63657e+06	1.60887e+06	1.67797e+06	1.76331e+06	1.83225e+06	1.9049e+06	1.96904e+06	2.12024e+06	2.14484e+06	2.25937e+06	2.4624e+06	2.55347e+06	2.68594e+06	2.83976e+06	3.02302e+06	3.10036e+06	3.19758e+06	3.32901e+06	3.54526e+06	3.64496e+06	3.72665e+06	3.86614e+06	3.99578e+06	4.14163e+06	4.17007e+06	4.23763e+06	4.44654e+06	4.51955e+06	4.74883e+06	4.78907e+06	4.85399e+06	4.88926e+06	4.98606e+06	5.07057e+06	5.21505e+06	5.37518e+06
101	SIB	2	66	0.568257	1.39776e+06	1.34534e+06	1.26655e+06	1.23745e+06	1.19937e+06	1.25883e+06	1.2503e+06	1.30561e+06	1.28807e+06	1.37824e+06	1.44678e+06	1.42477e+06	1.47777e+06	1.51778e+06	1.6161e+06	1.66441e+06	1.7562e+06	1.8304e+06	2.00027e+06	2.14816e+06	2.20579e+06	2.27873e+06	2.47611e+06	2.61106e+06	2.68137e+06	2.79091e+06	2.93212e+06	3.10361e+06	3.20196e+06	3.31862e+06	3.40236e+06	3.55689e+06	3.65068e+06	3.6917e+06	3.73648e+06	3.90174e+06	4.08799e+06	4.16701e+06	4.19223e+06	4.27971e+06	4.27604e+06	4.33999e+06	4.4029e+06	4.49681e+06	4.80236e+06
102	SIB	2	65	0.568257	1.32561e+06	1.33224e+06	1.27302e+06	1.23161e+06	1.19893e+06	1.25412e+06	1.2594e+06	1.2857e+06	1.32e+06	1.35064e+06	1.39112e+06	1.41935e+06	1.43401e+06	1.50534e+06	1.5739e+06	1.63517e+06	1.73832e+06	1.86555e+06	1.94606e+06	2.04002e+06	2.19701e+06	2.35672e+06	2.49133e+06	2.58855e+06	2.68808e+06	2.78721e+06	2.9625e+06	3.14419e+06	3.17247e+06	3.30543e+06	3.40972e+06	3.57967e+06	3.72628e+06	3.77788e+06	3.78181e+06	4.00001e+06	4.186e+06	4.31247e+06	4.33386e+06	4.38853e+06	4.36287e+06	4.35034e+06	4.504e+06	4.65025e+06	4.85588e+06
103	SIB	1	64	0.58762	1.32408e+06	1.31122e+06	1.16848e+06	1.19837e+06	1.21158e+06	1.19561e+06	1.19932e+06	1.1896e+06	1.2716e+06	1.3225e+06	1.30334e+06	1.34184e+06	1.40491e+06	1.46068e+06	1.55628e+06	1.61622e+06	1.71045e+06	1.78486e+06	1.89208e+06	1.99404e+06	2.09072e+06	2.25842e+06	2.35509e+06	2.48554e+06	2.60268e+06	2.66006e+06	2.84433e+06	2.94619e+06	3.084e+06	3.16328e+06	3.22834e+06	3.42332e+06	3.52603e+06	3.53608e+06	3.58422e+06	3.75738e+06	3.91478e+06	4.03175e+06	4.09859e+06	4.11936e+06	4.12258e+06	4.17121e+06	4.26384e+06	4.44582e+06	4.61843e+06
104	SIB	2	42	0.599889	1.30419e+06	1.30276e+06	1.20807e+06	1.21031e+06	1.19197e+06	1.17426e+06	1.19277e+06	1.2093e+06	1.30857e+06	1.36163e+06	1.32645e+06	1.42925e+06	1.39953e+06	1.50637e+06	1.57942e+06	1.64194e+06	1.69661e+06	1.81978e+06	1.92685e+06	2.01328e+06	2.16363e+06	2.30158e+06	2.42281e+06	2.64643e+06	2.72576e+06	2.80229e+06	2.94688e+06	3.10774e+06	3.23522e+06	3.2593e+06	3.36329e+06	3.53132e+06	3.65053e+06	3.65459e+06	3.72066e+06	3.97599e+06	4.10508e+06	4.27281e+06	4.34902e+06	4.35315e+06	4.34647e+06	4.35385e+06	4.47709e+06	4.61861e+06	4.83605e+06
105	SIB	2	70	0.616943	1.33941e+06	1.25526e+06	1.26286e+06	1.18768e+06	1.19992e+06	1.22674e+06	1.23249e+06	1.2621e+06	1.32807e+06	1.35704e+06	1.32801e+06	1.33839e+06	1.40465e+06	1.46251e+06	1.52847e+06	1.6338e+06	1.71432e+06	1.76333e+06	1.89468e+06	2.05215e+06	2.07938e+06	2.20204e+06	2.34894e+06	2.45093e+06	2.60159e+06	2.71288e+06	2.7805e+06	2.93694e+06	3.09585e+06	3.11319e+06	3.20009e+06	3.35472e+06	3.51367e+06	3.52716e+06	3.56778e+06	3.73188e+06	3.95738e+06	3.99438e+06	4.01907e+06	4.08112e+06	4.06838e+06	4.13321e+06	4.20412e+06	4.36232e+06	4.51253e+06
106	SIB	2	47	0.640697	1.36853e+06	1.29032e+06	1.27586e+06	1.21775e+06	1.31557e+06	1.25418e+06	1.29941e+06	1.31484e+06	1.30378e+06	1.41554e+06	1.4192e+06	1.47769e+06	1.49336e+06	1.59584e+06	1.65772e+06	1.75352e+06	1.81686e+06	1.91814e+06	1.93104e+06	2.1342e+06	2.19997e+06	2.31886e+06	2.46598e+06	2.57273e+06	2.74064e+06	2.76768e+06	2.94331e+06	3.12199e+06	3.24455e+06	3.31838e+06	3.42203e+06	3.58322e+06	3.66798e+06	3.65152e+06	3.7171e+06	3.8046e+06	3.96356e+06	4.1431e+06	4.14464e+06	4.21423e+06	4.29207e+06	4.30474e+06	4.41684e+06	4.4634e+06	4.63447e+06
107	SIB	1	70	0.648654	1.49695e+06	1.41299e+06	1.31388e+06	1.36397e+06	1.30163e+06	1.33284e+06	1.39069e+06	1.39777e+06	1.44535e+06	1.48379e+06	1.52143e+06	1.55649e+06	1.5457e+06	1.64342e+06	1.71834e+06	1.79625e+06	1.91571e+06	1.96448e+06	2.11103e+06	2.28391e+06	2.37893e+06	2.44803e+06	2.63262e+06	2.79783e+06	2.90008e+06	2.98827e+06	3.10992e+06	3.33058e+06	3.37776e+06	3.50376e+06	3.64414e+06	3.74787e+06	3.86231e+06	3.86066e+06	3.96008e+06	4.07114e+06	4.29713e+06	4.431e+06	4.52853e+06	4.57872e+06	4.60494e+06	4.59429e+06	4.71019e+06	4.90345e+06	5.0682e+06
108	SIB	2	63	0.667215	1.54372e+06	1.41093e+06	1.39126e+06	1.39528e+06	1.31828e+06	1.34354e+06	1.39366e+06	1.40659e+06	1.46903e+06	1.50248e+06	1.51993e+06	1.57495e+06	1.60498e+06	1.67618e+06	1.75807e+06	1.80245e+06	1.89336e+06	2.01544e+06	2.10701e+06	2.27213e+06	2.37044e+06	2.53433e+06	2.65752e+06	2.77565e+06	2.89204e+06	3.05418e+06	3.11398e+06	3.28191e+06	3.42212e+06	3.45069e+06	3.60693e+06	3.77651e+06	3.83973e+06	3.90005e+06	4.01988e+06	4.16373e+06	4.31947e+06	4.42076e+06	4.51497e+06	4.56243e+06	4.57232e+06	4.69931e+06	4.72459e+06	4.90105e+06	5.12418e+06
109	SIB	1	68	0.66804	1.38964e+06	1.32034e+06	1.23956e+06	1.28198e+06	1.24254e+06	1.2369e+06	1.26635e+06	1.29883e+06	1.36613e+06	1.39392e+06	1.41959e+06	1.44912e+06	1.46345e+06	1.51808e+06	1.63876e+06	1.68814e+06	1.73482e+06	1.83918e+06	1.95674e+06	2.09324e+06	2.19059e+06	2.25842e+06	2.3888e+06	2.55905e+06	2.61794e+06	2.74844e+06	2.92051e+06	3.05223e+06	3.22362e+06	3.28189e+06	3.33696e+06	3.49213e+06	3.64447e+06	3.67512e+06	3.70133e+06	3.89468e+06	4.03221e+06	4.15416e+06	4.24049e+06	4.29851e+06	4.31143e+06	4.35507e+06	4.45843e+06	4.5869e+06	4.77624e+06
110	SIB	1	57	0.693526	1.24267e+06	1.25283e+06	1.18245e+06	1.12386e+06	1.11585e+06	1.18518e+06	1.14615e+06	1.21532e+06	1.19715e+06	1.27708e+06	1.3332e+06	1.36722e+06	1.39823e+06	1.42141e+06	1.50595e+06	1.62759e+06	1.67706e+06	1.71495e+06	1.83113e+06	1.95986e+06	2.02597e+06	2.21783e+06	2.40663e+06	2.56852e+06	2.69936e+06	2.73951e+06	2.87139e+06	3.02154e+06	3.07518e+06	3.10673e+06	3.16398e+06	3.32257e+06	3.44324e+06	3.53081e+06	3.63279e+06	3.8106e+06	4.00832e+06	4.16981e+06	4.15992e+06	4.23985e+06	4.15343e+06	4.18913e+06	4.32823e+06	4.40392e+06	4.6547e+06
111	SIB	2	70	0.709314	1.43081e+06	1.32023e+06	1.32212e+06	1.31922e+06	1.32818e+06	1.36397e+06	1.34073e+06	1.37839e+06	1.43793e+06	1.46753e+06	1.53441e+06	1.54012e+06	1.63205e+06	1.67724e+06	1.72216e+06	1.789e+06	1.88325e+06	1.9597e+06	2.11722e+06	2.25447e+06	2.43584e+06	2.40801e+06	2.6113e+06	2.78767e+06	2.91899e+06	3.09727e+06	3.13549e+06	3.35891e+06	3.50379e+06	3.55929e+06	3.67516e+06	3.83557e+06	4.02191e+06	3.95184e+06	4.01643e+06	4.13834e+06	4.33516e+06	4.46201e+06	4.52722e+06	4.56419e+06	4.59645e+06	4.63898e+06	4.75744e+06	4.89076e+06	5.13165e+06
112	SIB	2	70	0.709314	1.49252e+06	1.4844e+06	1.42056e+06	1.3939e+06	1.41683e+06	1.40347e+06	1.43143e+06	1.45482e+06	1.46014e+06	1.5114e+06	1.56553e+06	1.63717e+06	1.68839e+06	1.72737e+06	1.79365e+06	1.87474e+06	2.00016e+06	2.08052e+06	2.17247e+06	2.37668e+06	2.44414e+06	2.5704e+06	2.74983e+06	2.9144e+06	2.98785e+06	3.10278e+06	3.22942e+06	3.39683e+06	3.52963e+06	3.52083e+06	3.74013e+06	3.8888e+06	4.00339e+06	4.02595e+06	4.03317e+06	4.1841e+06	4.374e+06	4.52516e+06	4.58663e+06	4.60591e+06	4.67734e+06	4.70267e+06	4.81585e+06	4.96232e+06	5.18781e+06
113	SIB	1	49	0.719497	1.2815e+06	1.29055e+06	1.12593e+06	1.16158e+06	1.16521e+06	1.18574e+06	1.12976e+06	1.23185e+06	1.26804e+06	1.29068e+06	1.30932e+06	1.33781e+06	1.36366e+06	1.46845e+06	1.55499e+06	1.6212e+06	1.70669e+06	1.80448e+06	1.91133e+06	2.03493e+06	2.10337e+06	2.23395e+06	2.40671e+06	2.48272e+06	2.59703e+06	2.69865e+06	2.85983e+06	3.02426e+06	3.10028e+06	3.16726e+06	3.29156e+06	3.48667e+06	3.61496e+06	3.58231e+06	3.63195e+06	3.81514e+06	3.96461e+06	4.13342e+06	4.15341e+06	4.20813e+06	4.25898e+06	4.30479e+06	4.35015e+06	4.55045e+06	4.6757e+06
114	SIB	1	35	0.719497	1.47679e+06	1.42685e+06	1.36665e+06	1.34218e+06	1.37275e+06	1.36445e+06	1.39081e+06	1.39584e+06	1.44262e+06	1.49604e+06	1.52655e+06	1.58837e+06	1.62414e+06	1.71342e+06	1.79406e+06	1.84826e+06	1.92995e+06	2.00918e+06	2.20098e+06	2.27507e+06	2.39241e+06	2.59005e+06	2.72349e+06	2.89586e+06	2.99285e+06	3.04952e+06	3.20589e+06	3.37798e+06	3.50517e+06	3.55366e+06	3.6937e+06	3.84205e+06	4.0196e+06	4.05057e+06	4.12263e+06	4.32382e+06	4.52646e+06	4.60393e+06	4.67136e+06	4.71701e+06	4.75674e+06	4.82879e+06	4.83516e+06	5.07028e+06	5.25518e+06
115	SIB	1	48	0.719497	1.37067e+06	1.28956e+06	1.237e+06	1.23572e+06	1.22792e+06	1.21404e+06	1.30876e+06	1.27481e+06	1.31817e+06	1.33534e+06	1.38935e+06	1.44849e+06	1.49874e+06	1.55462e+06	1.60037e+06	1.73564e+06	1.71219e+06	1.86629e+06	1.94015e+06	2.04725e+06	2.11917e+06	2.31091e+06	2.46014e+06	2.60719e+06	2.63435e+06	2.71958e+06	2.8804e+06	3.08081e+06	3.19969e+06	3.22685e+06	3.37057e+06	3.49309e+06	3.64081e+06	3.6908e+06	3.73602e+06	3.86264e+06	4.00765e+06	4.158e+06	4.2248e+06	4.24061e+06	4.33045e+06	4.32177e+06	4.41189e+06	4.57934e+06	4.77758e+06
116	SIB	2	83	0.726214	1.26404e+06	1.20724e+06	1.19469e+06	1.10219e+06	1.13815e+06	1.14768e+06	1.15346e+06	1.1873e+06	1.19201e+06	1.28878e+06	1.31825e+06	1.33634e+06	1.42718e+06	1.42244e+06	1.48182e+06	1.55605e+06	1.66401e+06	1.7098e+06	1.80727e+06	1.94883e+06	2.04314e+06	2.15729e+06	2.28869e+06	2.47569e+06	2.6487e+06	2.71691e+06	2.84094e+06	2.92851e+06	3.08028e+06	3.14038e+06	3.21144e+06	3.38893e+06	3.4799e+06	3.51952e+06	3.54441e+06	3.71451e+06	3.89228e+06	4.06256e+06	4.07952e+06	4.03723e+06	4.09113e+06	4.11369e+06	4.26906e+06	4.34052e+06	4.57726e+06
117	SIB	1	62	0.734318	1.22686e+06	1.18242e+06	1.13301e+06	1.16486e+06	1.17271e+06	1.14825e+06	1.18637e+06	1.18054e+06	1.22555e+06	1.23008e+06	1.29893e+06	1.34039e+06	1.36355e+06	1.42496e+06	1.48945e+06	1.5863e+06	1.65177e+06	1.71723e+06	1.82e+06	1.96469e+06	2.06802e+06	2.14964e+06	2.25497e+06	2.38435e+06	2.45386e+06	2.54603e+06	2.65337e+06	2.90094e+06	3.04461e+06	3.07509e+06	3.17998e+06	3.34869e+06	3.45759e+06	3.40611e+06	3.46072e+06	3.57943e+06	3.7573e+06	3.89468e+06	3.98778e+06	3.99904e+06	4.02602e+06	4.1079e+06	4.11517e+06	4.24212e+06	4.43334e+06
118	SIB	2	51	0.735729	1.6007e+06	1.53733e+06	1.45656e+06	1.48058e+06	1.46778e+06	1.48026e+06	1.51906e+06	1.55401e+06	1.59138e+06	1.57696e+06	1.71512e+06	1.70549e+06	1.72057e+06	1.81909e+06	1.91511e+06	2.02891e+06	2.08348e+06	2.13478e+06	2.3417e+06	2.43733e+06	2.57487e+06	2.73699e+06	2.88729e+06	3.07537e+06	3.16148e+06	3.30545e+06	3.43303e+06	3.56136e+06	3.64173e+06	3.7297e+06	3.84432e+06	3.99923e+06	4.16955e+06	4.20481e+06	4.29737e+06	4.45475e+06	4.62965e+06	4.74149e+06	4.81971e+06	4.91674e+06	4.90499e+06	4.97636e+06	5.01145e+06	5.17189e+06	5.38811e+06
119	SIB	1	57	0.744857	1.46783e+06	1.43083e+06	1.36212e+06	1.36828e+06	1.3888e+06	1.41235e+06	1.46229e+06	1.39381e+06	1.50059e+06	1.49365e+06	1.54564e+06	1.60174e+06	1.6697e+06	1.75429e+06	1.81698e+06	1.86785e+06	1.96963e+06	2.06419e+06	2.16516e+06	2.31862e+06	2.45755e+06	2.64264e+06	2.84997e+06	3.03446e+06	3.1013e+06	3.22892e+06	3.3132e+06	3.44528e+06	3.57697e+06	3.6476e+06	3.70885e+06	3.90917e+06	4.00058e+06	4.1045e+06	4.27e+06	4.51218e+06	4.66446e+06	4.7421e+06	4.80067e+06	4.84723e+06	4.89649e+06	4.94665e+06	5.05054e+06	5.24756e+06	5.45125e+06
120	SIB	2	56	0.781961	1.29198e+06	1.24971e+06	1.18614e+06	1.1764e+06	1.18556e+06	1.24694e+06	1.27725e+06	1.22211e+06	1.28629e+06	1.37355e+06	1.34305e+06	1.37978e+06	1.42377e+06	1.481e+06	1.53806e+06	1.59356e+06	1.68393e+06	1.76661e+06	1.88248e+06	2.03064e+06	2.08933e+06	2.23267e+06	2.429e+06	2.53147e+06	2.67113e+06	2.70695e+06	2.78783e+06	2.94116e+06	3.03569e+06	3.04184e+06	3.14043e+06	3.30184e+06	3.36223e+06	3.43299e+06	3.56399e+06	3.69203e+06	3.88859e+06	4.02599e+06	4.03589e+06	4.0608e+06	4.06684e+06	4.1572e+06	4.19796e+06	4.3304e+06	4.55998e+06
121	SIB	2	51	0.827248	1.54373e+06	1.50068e+06	1.42973e+06	1.39738e+06	1.40268e+06	1.4239e+06	1.45531e+06	1.4967e+06	1.53167e+06	1.5311e+06	1.58959e+06	1.67942e+06	1.74598e+06	1.78514e+06	1.80853e+06	1.93667e+06	2.01556e+06	2.12697e+06	2.2602e+06	2.3875e+06	2.50729e+06	2.62984e+06	2.72983e+06	2.7946e+06	2.98444e+06	3.02842e+06	3.28672e+06	3.48907e+06	3.62745e+06	3.73666e+06	3.90067e+06	4.03094e+06	4.17336e+06	4.17898e+06	4.1886e+06	4.29433e+06	4.42384e+06	4.61772e+06	4.71423e+06	4.71621e+06	4.84618e+06	4.87681e+06	4.94066e+06	5.15359e+06	5.3579e+06
122	SIB	2	60	0.833657	1.32561e+06	1.22489e+06	1.22505e+06	1.20916e+06	1.2096e+06	1.2417e+06	1.18496e+06	1.2357e+06	1.35342e+06	1.32596e+06	1.32952e+06	1.37165e+06	1.47083e+06	1.50057e+06	1.55998e+06	1.6301e+06	1.6889e+06	1.71664e+06	1.88262e+06	1.96439e+06	2.11458e+06	2.26337e+06	2.37664e+06	2.5813e+06	2.68172e+06	2.74102e+06	2.7994e+06	2.94548e+06	3.10107e+06	3.15116e+06	3.20685e+06	3.34486e+06	3.45192e+06	3.50712e+06	3.61834e+06	3.79137e+06	3.91007e+06	4.02079e+06	4.12121e+06	4.05941e+06	4.12645e+06	4.12059e+06	4.23564e+06	4.37685e+06	4.60755e+06
123	SIB	1	57	0.860504	1.46448e+06	1.41127e+06	1.35304e+06	1.33577e+06	1.30528e+06	1.31611e+06	1.35863e+06	1.40622e+06	1.46584e+06	1.45449e+06	1.48712e+06	1.54278e+06	1.60478e+06	1.68347e+06	1.7132e+06	1.83752e+06	1.9073e+06	1.99798e+06	2.08575e+06	2.2494e+06	2.36372e+06	2.49293e+06	2.65741e+06	2.75264e+06	2.89735e+06	2.97325e+06	3.12475e+06	3.26446e+06	3.42208e+06	3.50776e+06	3.57588e+06	3.78816e+06	3.85216e+06	3.90452e+06	3.91492e+06	4.13418e+06	4.27148e+06	4.42306e+06	4.44411e+06	4.53939e+06	4.54537e+06	4.65491e+06	4.68361e+06	4.84033e+06	5.02711e+06
124	SIB	1	56	0.862156	1.29443e+06	1.35485e+06	1.27434e+06	1.26862e+06	1.27873e+06	1.27136e+06	1.27394e+06	1.33093e+06	1.30924e+06	1.37479e+06	1.35548e+06	1.43812e+06	1.52457e+06	1.56072e+06	1.64236e+06	1.75279e+06	1.79257e+06	1.88681e+06	1.97143e+06	2.09464e+06	2.19872e+06	2.33541e+06	2.43994e+06	2.6442e+06	2.70059e+06	2.84348e+06	2.93848e+06	3.1046e+06	3.19935e+06	3.26838e+06	3.32741e+06	3.50928e+06	3.61745e+06	3.67496e+06	3.72864e+06	3.90048e+06	4.06972e+06	4.135e+06	4.23468e+06	4.23394e+06	4.31301e+06	4.3346e+06	4.44637e+06	4.57732e+06	4.73897e+06
125	SIB	1	60	0.898642	1.37728e+06	1.3172e+06	1.29752e+06	1.24824e+06	1.33242e+06	1.32927e+06	1.31596e+06	1.36012e+06	1.40902e+06	1.41361e+06	1.4297e+06	1.49889e+06	1.51312e+06	1.59563e+06	1.68819e+06	1.77501e+06	1.83453e+06	1.87765e+06	1.9507e+06	2.1084e+06	2.24434e+06	2.37693e+06	2.48804e+06	2.73485e+06	2.8047e+06	2.83402e+06	2.95267e+06	3.09613e+06	3.17715e+06	3.18932e+06	3.36062e+06	3.51217e+06	3.5808e+06	3.65753e+06	3.74789e+06	3.99366e+06	4.12739e+06	4.29812e+06	4.27335e+06	4.30559e+06	4.34668e+06	4.34305e+06	4.45535e+06	4.60247e+06	4.78666e+06
126	SIB	1	72	0.955203	1.33134e+06	1.36561e+06	1.23132e+06	1.21196e+06	1.21065e+06	1.21332e+06	1.26504e+06	1.28345e+06	1.3317e+06	1.36753e+06	1.38439e+06	1.43345e+06	1.46123e+06	1.55947e+06	1.5885e+06	1.68015e+06	1.69822e+06	1.80049e+06	1.90575e+06	2.09127e+06	2.16279e+06	2.26552e+06	2.42161e+06	2.5495e+06	2.60499e+06	2.75472e+06	2.84877e+06	3.06236e+06	3.13947e+06	3.20236e+06	3.29728e+06	3.46356e+06	3.554e+06	3.59377e+06	3.63221e+06	3.77341e+06	3.96266e+06	4.02137e+06	4.13123e+06	4.14587e+06	4.17963e+06	4.23094e+06	4.31341e+06	4.45228e+06	4.60571e+06
127	SIB	2	62	0.957035	1.46148e+06	1.40512e+06	1.35272e+06	1.31194e+06	1.27224e+06	1.31538e+06	1.33314e+06	1.35909e+06	1.44276e+06	1.43531e+06	1.47197e+06	1.50895e+06	1.57905e+06	1.64529e+06	1.67952e+06	1.7922e+06	1.85853e+06	1.99774e+06	2.07304e+06	2.1976e+06	2.35834e+06	2.44443e+06	2.61285e+06	2.76653e+06	2.87664e+06	2.92543e+06	3.06875e+06	3.25287e+06	3.37188e+06	3.45747e+06	3.56778e+06	3.7381e+06	3.85089e+06	3.9146e+06	3.98292e+06	4.157e+06	4.33659e+06	4.51422e+06	4.53617e+06	4.58508e+06	4.57818e+06	4.632e+06	4.72752e+06	4.83681e+06	5.0688e+06
128	SIB	1	72	0.957035	1.23967e+06	1.19933e+06	1.16413e+06	1.15914e+06	1.1865e+06	1.16602e+06	1.22156e+06	1.23909e+06	1.26741e+06	1.32719e+06	1.33132e+06	1.31248e+06	1.41521e+06	1.51773e+06	1.5395e+06	1.61123e+06	1.67765e+06	1.74465e+06	1.84913e+06	2.00366e+06	2.13398e+06	2.23588e+06	2.39602e+06	2.58781e+06	2.69301e+06	2.78839e+06	2.86135e+06	2.9574e+06	3.09909e+06	3.09237e+06	3.23292e+06	3.33874e+06	3.4392e+06	3.54255e+06	3.62736e+06	3.80409e+06	3.97355e+06	4.07898e+06	4.11271e+06	4.15364e+06	4.12185e+06	4.17352e+06	4.25941e+06	4.3781e+06	4.6135e+06
129	SIB	2	79	0.99023	1.50785e+06	1.48476e+06	1.42031e+06	1.38656e+06	1.43187e+06	1.48869e+06	1.50896e+06	1.55654e+06	1.56139e+06	1.55565e+06	1.66873e+06	1.69234e+06	1.77136e+06	1.82948e+06	1.90698e+06	1.99433e+06	2.00063e+06	2.14228e+06	2.28939e+06	2.38987e+06	2.53561e+06	2.69976e+06	2.87183e+06	3.05141e+06	3.22903e+06	3.3041e+06	3.46531e+06	3.64701e+06	3.70552e+06	3.86503e+06	3.92143e+06	3.98927e+06	4.14446e+06	4.20134e+06	4.29021e+06	4.47628e+06	4.67542e+06	4.68082e+06	4.77372e+06	4.77439e+06	4.80499e+06	4.918e+06	5.00659e+06	5.17176e+06	5.32962e+06
130	SIB	2	75	0.99023	1.42164e+06	1.35365e+06	1.29078e+06	1.25272e+06	1.32241e+06	1.22828e+06	1.24631e+06	1.31915e+06	1.39375e+06	1.37184e+06	1.44997e+06	1.50019e+06	1.55952e+06	1.59061e+06	1.64213e+06	1.74688e+06	1.83706e+06	1.9247e+06	1.99806e+06	2.14848e+06	2.30376e+06	2.41245e+06	2.62782e+06	2.79383e+06	2.88907e+06	2.96697e+06	3.04345e+06	3.2097e+06	3.33213e+06	3.35083e+06	3.45145e+06	3.54838e+06	3.65733e+06	3.73876e+06	3.8132e+06	4.04311e+06	4.23385e+06	4.34657e+06	4.3783e+06	4.35962e+06	4.38334e+06	4.44657e+06	4.51853e+06	4.64816e+06	4.81358e+06
131	SIB	2	71	0.996514	1.27839e+06	1.28599e+06	1.22043e+06	1.20729e+06	1.21537e+06	1.25406e+06	1.24665e+06	1.3245e+06	1.39247e+06	1.37163e+06	1.41868e+06	1.46859e+06	1.52754e+06	1.57294e+06	1.66137e+06	1.75684e+06	1.76202e+06	1.88424e+06	1.93094e+06	2.05878e+06	2.17822e+06	2.30787e+06	2.4979e+06	2.64049e+06	2.79003e+06	2.88392e+06	2.93126e+06	3.09101e+06	3.21446e+06	3.23167e+06	3.31517e+06	3.41928e+06	3.52335e+06	3.623e+06	3.75718e+06	3.89215e+06	4.08125e+06	4.08867e+06	4.20529e+06	4.21575e+06	4.28408e+06	4.28754e+06	4.42087e+06	4.51555e+06	4.68641e+06
132	SIB	1	65	1.0399	1.3833e+06	1.31726e+06	1.24389e+06	1.25405e+06	1.24166e+06	1.27722e+06	1.27683e+06	1.31164e+06	1.36572e+06	1.34843e+06	1.43791e+06	1.46554e+06	1.48861e+06	1.54364e+06	1.65109e+06	1.71984e+06	1.81825e+06	1.91692e+06	2.00464e+06	2.15394e+06	2.2101e+06	2.36866e+06	2.44318e+06	2.56873e+06	2.65168e+06	2.72024e+06	2.87871e+06	3.05659e+06	3.27825e+06	3.33747e+06	3.46008e+06	3.6698e+06	3.72013e+06	3.75938e+06	3.77366e+06	3.8982e+06	3.99128e+06	4.13111e+06	4.2407e+06	4.28757e+06	4.36084e+06	4.37595e+06	4.51518e+06	4.61877e+06	4.78039e+06
133	SIB	2	51	1.04235	1.42487e+06	1.28679e+06	1.27951e+06	1.29226e+06	1.28836e+06	1.28103e+06	1.31999e+06	1.34724e+06	1.38096e+06	1.4094e+06	1.4133e+06	1.40979e+06	1.53188e+06	1.53523e+06	1.62657e+06	1.68611e+06	1.74856e+06	1.81218e+06	1.8748e+06	1.99519e+06	2.18142e+06	2.29249e+06	2.46697e+06	2.67659e+06	2.75952e+06	2.80246e+06	2.92122e+06	2.98086e+06	3.08613e+06	3.06584e+06	3.14262e+06	3.27323e+06	3.44647e+06	3.5444e+06	3.60701e+06	3.87064e+06	3.97794e+06	4.12565e+06	4.11887e+06	4.16522e+06	4.15592e+06	4.12037e+06	4.22265e+06	4.41646e+06	4.63869e+06
134	SIB	2	71	1.08405	1.46092e+06	1.36368e+06	1.31736e+06	1.36679e+06	1.35082e+06	1.33169e+06	1.31245e+06	1.40615e+06	1.45725e+06	1.42279e+06	1.52646e+06	1.55436e+06	1.59026e+06	1.62609e+06	1.67622e+06	1.81601e+06	1.88704e+06	1.92136e+06	2.05792e+06	2.17532e+06	2.26327e+06	2.46959e+06	2.64665e+06	2.75194e+06	2.87646e+06	2.90813e+06	3.04915e+06	3.23645e+06	3.32397e+06	3.32589e+06	3.43571e+06	3.63276e+06	3.7412e+06	3.82727e+06	3.87963e+06	4.00423e+06	4.18404e+06	4.29732e+06	4.38504e+06	4.36528e+06	4.35288e+06	4.42281e+06	4.42558e+06	4.66531e+06	4.9013e+06
135	SIB	2	67	1.08538	1.36697e+06	1.31675e+06	1.24597e+06	1.18529e+06	1.20454e+06	1.22805e+06	1.25865e+06	1.25466e+06	1.28243e+06	1.33387e+06	1.30542e+06	1.37028e+06	1.40126e+06	1.50729e+06	1.59274e+06	1.55785e+06	1.70391e+06	1.77617e+06	1.92978e+06	2.05277e+06	2.14642e+06	2.22226e+06	2.42429e+06	2.51725e+06	2.6093e+06	2.72664e+06	2.81274e+06	2.96275e+06	3.07215e+06	3.15784e+06	3.22811e+06	3.39178e+06	3.54985e+06	3.53519e+06	3.62232e+06	3.81917e+06	3.96405e+06	4.02248e+06	4.09672e+06	4.1666e+06	4.17097e+06	4.18883e+06	4.2777e+06	4.41762e+06	4.63572e+06
136	SIB	1	42	1.09955	1.43324e+06	1.39228e+06	1.36537e+06	1.3727e+06	1.35485e+06	1.35333e+06	1.40371e+06	1.38348e+06	1.46323e+06	1.45265e+06	1.51166e+06	1.57691e+06	1.63377e+06	1.7129e+06	1.8064e+06	1.91053e+06	1.99178e+06	2.10322e+06	2.16507e+06	2.33625e+06	2.465e+06	2.62524e+06	2.79957e+06	3.0058e+06	3.12451e+06	3.2063e+06	3.32451e+06	3.48482e+06	3.59396e+06	3.70088e+06	3.77175e+06	3.91934e+06	4.07233e+06	4.14046e+06	4.21862e+06	4.42969e+06	4.57288e+06	4.70354e+06	4.81563e+06	4.78936e+06	4.91538e+06	4.9076e+06	5.03732e+06	5.13609e+06	5.36916e+06
137	SIB	1	43	1.09955	1.24311e+06	1.19182e+06	1.11246e+06	1.14382e+06	1.08192e+06	1.17819e+06	1.18381e+06	1.2133e+06	1.21335e+06	1.26827e+06	1.28404e+06	1.32618e+06	1.37583e+06	1.4519e+06	1.53923e+06	1.57432e+06	1.72728e+06	1.67857e+06	1.86521e+06	1.99517e+06	2.02766e+06	2.16949e+06	2.23776e+06	2.3528e+06	2.41157e+06	2.57163e+06	2.70522e+06	2.92474e+06	2.99931e+06	3.16486e+06	3.26091e+06	3.39518e+06	3.47811e+06	3.45339e+06	3.47609e+06	3.60466e+06	3.78401e+06	3.87368e+06	3.9915e+06	4.02609e+06	4.10187e+06	4.17057e+06	4.18793e+06	4.28485e+06	4.49615e+06
138	SIB	2	54	1.12216	1.42763e+06	1.32174e+06	1.27528e+06	1.29536e+06	1.29614e+06	1.28986e+06	1.31229e+06	1.34589e+06	1.38124e+06	1.45832e+06	1.46894e+06	1.54568e+06	1.53641e+06	1.55177e+06	1.69556e+06	1.77818e+06	1.82208e+06	1.90386e+06	2.00405e+06	2.13808e+06	2.21567e+06	2.38492e+06	2.51634e+06	2.62735e+06	2.74111e+06	2.87562e+06	2.9767e+06	3.14389e+06	3.24854e+06	3.29792e+06	3.43009e+06	3.6051e+06	3.72131e+06	3.75485e+06	3.77035e+06	3.97149e+06	4.12043e+06	4.27796e+06	4.34799e+06	4.28885e+06	4.37188e+06	4.43105e+06	4.48463e+06	4.61475e+06	4.79299e+06
139	SIB	2	56	1.19461	1.58842e+06	1.53859e+06	1.4649e+06	1.47448e+06	1.4553e+06	1.4879e+06	1.51824e+06	1.53707e+06	1.56354e+06	1.60813e+06	1.66147e+06	1.70153e+06	1.75547e+06	1.81564e+06	1.9084e+06	2.00362e+06	2.07782e+06	2.13213e+06	2.28516e+06	2.44903e+06	2.54937e+06	2.65573e+06	2.76899e+06	2.90782e+06	3.01681e+06	3.16059e+06	3.33003e+06	3.51292e+06	3.69471e+06	3.78581e+06	3.94069e+06	4.06449e+06	4.22222e+06	4.18721e+06	4.23708e+06	4.40166e+06	4.55877e+06	4.6832e+06	4.76781e+06	4.81834e+06	4.89571e+06	4.95412e+06	5.08363e+06	5.18968e+06	5.4118e+06
140	SIB	1	51	1.19675	1.51707e+06	1.48393e+06	1.44876e+06	1.44512e+06	1.42997e+06	1.4004e+06	1.48034e+06	1.51186e+06	1.53791e+06	1.56364e+06	1.60864e+06	1.70152e+06	1.74272e+06	1.78737e+06	1.83337e+06	1.93376e+06	2.00699e+06	2.13083e+06	2.20282e+06	2.35025e+06	2.54202e+06	2.61861e+06	2.7956e+06	2.94277e+06	3.08232e+06	3.11176e+06	3.28408e+06	3.4383e+06	3.62435e+06	3.68049e+06	3.71258e+06	3.8857e+06	4.08497e+06	4.10691e+06	4.17891e+06	4.4223e+06	4.55945e+06	4.70817e+06	4.75279e+06	4.81346e+06	4.88381e+06	4.89663e+06	5.00297e+06	5.16874e+06	5.33483e+06
141	SIB	2	65	1.22023	1.49653e+06	1.50849e+06	1.47427e+06	1.41791e+06	1.38652e+06	1.41454e+06	1.49064e+06	1.49168e+06	1.56315e+06	1.57703e+06	1.61695e+06	1.67362e+06	1.71789e+06	1.81345e+06	1.88138e+06	1.95497e+06	2.01988e+06	2.16256e+06	2.19893e+06	2.37197e+06	2.4943e+06	2.64454e+06	2.83501e+06	3.04012e+06	3.17001e+06	3.20794e+06	3.35448e+06	3.48483e+06	3.61864e+06	3.69178e+06	3.80031e+06	3.90237e+06	4.09253e+06	4.13474e+06	4.23301e+06	4.4173e+06	4.61723e+06	4.75378e+06	4.77582e+06	4.77833e+06	4.80777e+06	4.86149e+06	4.93454e+06	5.17036e+06	5.39489e+06
142	SIB	2	57	1.25984	1.2882e+06	1.23812e+06	1.1464e+06	1.13029e+06	1.13661e+06	1.192e+06	1.22356e+06	1.13743e+06	1.22899e+06	1.25985e+06	1.31804e+06	1.27914e+06	1.4158e+06	1.34395e+06	1.56876e+06	1.57475e+06	1.6447e+06	1.73238e+06	1.82957e+06	1.98942e+06	2.0856e+06	2.13271e+06	2.39634e+06	2.52123e+06	2.57972e+06	2.69376e+06	2.74896e+06	2.94513e+06	3.03724e+06	3.06559e+06	3.13469e+06	3.31475e+06	3.48761e+06	3.50757e+06	3.58955e+06	3.76443e+06	3.98503e+06	4.05393e+06	4.06957e+06	4.08488e+06	4.12397e+06	4.16642e+06	4.19161e+06	4.3333e+06	4.62107e+06
143	SIB	1	72	1.27539	1.37998e+06	1.3511e+06	1.28438e+06	1.27263e+06	1.24615e+06	1.31199e+06	1.35686e+06	1.33193e+06	1.31486e+06	1.3885e+06	1.3438e+06	1.44398e+06	1.50932e+06	1.58118e+06	1.62093e+06	1.69432e+06	1.80517e+06	1.86191e+06	1.89863e+06	2.08216e+06	2.18003e+06	2.30602e+06	2.52549e+06	2.67514e+06	2.75835e+06	2.8019e+06	2.89479e+06	3.01174e+06	3.12765e+06	3.17591e+06	3.29701e+06	3.43421e+06	3.52532e+06	3.55364e+06	3.64614e+06	3.83972e+06	4.0698e+06	4.12894e+06	4.13545e+06	4.16562e+06	4.15703e+06	4.21792e+06	4.3173e+06	4.40507e+06	4.66607e+06
144	SIB	1	57	1.30246	1.4485e+06	1.35003e+06	1.35471e+06	1.34018e+06	1.37224e+06	1.39192e+06	1.33728e+06	1.42834e+06	1.43579e+06	1.54319e+06	1.50757e+06	1.54104e+06	1.62885e+06	1.63522e+06	1.78072e+06	1.81341e+06	1.86644e+06	1.97953e+06	2.12129e+06	2.22522e+06	2.32234e+06	2.46506e+06	2.65253e+06	2.75176e+06	2.89039e+06	2.93337e+06	3.10558e+06	3.22574e+06	3.27518e+06	3.42631e+06	3.4914e+06	3.64483e+06	3.74583e+06	3.80342e+06	3.88971e+06	4.06052e+06	4.22698e+06	4.40146e+06	4.42284e+06	4.47181e+06	4.44821e+06	4.46259e+06	4.58265e+06	4.76985e+06	4.9632e+06
145	SIB	2	69	1.36072	1.40319e+06	1.37765e+06	1.34984e+06	1.32028e+06	1.28794e+06	1.26776e+06	1.35381e+06	1.34391e+06	1.392e+06	1.38126e+06	1.43951e+06	1.49216e+06	1.49178e+06	1.62775e+06	1.65781e+06	1.74627e+06	1.80223e+06	1.88468e+06	2.00284e+06	2.10037e+06	2.26059e+06	2.40361e+06	2.56513e+06	2.68465e+06	2.75709e+06	2.84157e+06	3.00048e+06	3.11609e+06	3.25271e+06	3.28201e+06	3.43635e+06	3.54894e+06	3.67666e+06	3.68273e+06	3.79882e+06	3.98718e+06	4.12294e+06	4.22631e+06	4.30348e+06	4.28195e+06	4.28371e+06	4.32645e+06	4.41015e+06	4.58244e+06	4.83346e+06
146	SIB	1	64	1.42872	1.59776e+06	1.53349e+06	1.47565e+06	1.4997e+06	1.46907e+06	1.48906e+06	1.51416e+06	1.53264e+06	1.58877e+06	1.61168e+06	1.65535e+06	1.75207e+06	1.81004e+06	1.82399e+06	1.94008e+06	2.02408e+06	2.05878e+06	2.22608e+06	2.3142e+06	2.45959e+06	2.61928e+06	2.74141e+06	2.88216e+06	3.09318e+06	3.1547e+06	3.32273e+06	3.42013e+06	3.56813e+06	3.77366e+06	3.79099e+06	3.92245e+06	4.12228e+06	4.22518e+06	4.30831e+06	4.36997e+06	4.49562e+06	4.68935e+06	4.84936e+06	4.9548e+06	4.95786e+06	4.99288e+06	5.07315e+06	5.17035e+06	5.38794e+06	5.55307e+06
147	SIB	1	73	1.45793	1.51616e+06	1.41452e+06	1.30905e+06	1.35247e+06	1.30568e+06	1.33758e+06	1.3256e+06	1.41318e+06	1.35704e+06	1.48977e+06	1.51271e+06	1.54948e+06	1.59254e+06	1.60614e+06	1.73257e+06	1.79851e+06	1.87026e+06	1.96326e+06	2.06746e+06	2.20607e+06	2.34714e+06	2.50146e+06	2.68618e+06	2.82628e+06	2.93374e+06	3.04179e+06	3.09672e+06	3.31486e+06	3.42152e+06	3.43779e+06	3.59575e+06	3.74374e+06	3.83903e+06	3.94595e+06	4.01207e+06	4.24074e+06	4.39043e+06	4.52154e+06	4.62415e+06	4.57484e+06	4.58037e+06	4.62138e+06	4.69203e+06	4.92318e+06	5.13484e+06
148	SIB	1	57	1.46461	1.32452e+06	1.27784e+06	1.21432e+06	1.18972e+06	1.16717e+06	1.16419e+06	1.24896e+06	1.23218e+06	1.28216e+06	1.34589e+06	1.38427e+06	1.33171e+06	1.39922e+06	1.41244e+06	1.55919e+06	1.59452e+06	1.72793e+06	1.7548e+06	1.9264e+06	2.06672e+06	2.11303e+06	2.22303e+06	2.32394e+06	2.51049e+06	2.57533e+06	2.6731e+06	2.79107e+06	2.99577e+06	3.16863e+06	3.2055e+06	3.2841e+06	3.40431e+06	3.55003e+06	3.57227e+06	3.57809e+06	3.6975e+06	3.88423e+06	3.99735e+06	4.0895e+06	4.09998e+06	4.13362e+06	4.19583e+06	4.26248e+06	4.405e+06	4.5782e+06
149	SIB	2	61	1.47271	1.4223e+06	1.32643e+06	1.30044e+06	1.28693e+06	1.32204e+06	1.26289e+06	1.31934e+06	1.33206e+06	1.37103e+06	1.41884e+06	1.42034e+06	1.43527e+06	1.4902e+06	1.56445e+06	1.65576e+06	1.75263e+06	1.77941e+06	1.87809e+06	1.9634e+06	2.06451e+06	2.15667e+06	2.38631e+06	2.50548e+06	2.70095e+06	2.81091e+06	2.85586e+06	2.98724e+06	3.0688e+06	3.17498e+06	3.20788e+06	3.30261e+06	3.38275e+06	3.56825e+06	3.66366e+06	3.70792e+06	3.94196e+06	4.11217e+06	4.23437e+06	4.22424e+06	4.21398e+06	4.26064e+06	4.29938e+06	4.40008e+06	4.52557e+06	4.73012e+06
150	SIB	1	76	1.47803	1.34129e+06	1.27872e+06	1.22893e+06	1.23346e+06	1.24673e+06	1.24227e+06	1.28705e+06	1.29919e+06	1.29949e+06	1.36541e+06	1.37771e+06	1.4136e+06	1.44586e+06	1.50348e+06	1.57269e+06	1.64701e+06	1.70661e+06	1.83236e+06	1.87962e+06	2.06168e+06	2.13546e+06	2.24489e+06	2.49679e+06	2.62842e+06	2.72218e+06	2.81842e+06	2.86427e+06	2.99396e+06	3.15626e+06	3.1778e+06	3.28451e+06	3.44748e+06	3.54484e+06	3.64284e+06	3.72424e+06	3.87433e+06	4.03847e+06	4.12847e+06	4.21423e+06	4.24656e+06	4.22744e+06	4.33202e+06	4.33366e+06	4.45674e+06	4.64897e+06
151	SIB	2	60	1.48453	1.38056e+06	1.32379e+06	1.29205e+06	1.26117e+06	1.24465e+06	1.26176e+06	1.27965e+06	1.28103e+06	1.38475e+06	1.36291e+06	1.44678e+06	1.55189e+06	1.50574e+06	1.58478e+06	1.68599e+06	1.72991e+06	1.80111e+06	1.94383e+06	2.05809e+06	2.15784e+06	2.32466e+06	2.43648e+06	2.60407e+06	2.83864e+06	2.98175e+06	3.03869e+06	3.15574e+06	3.29083e+06	3.39083e+06	3.38664e+06	3.49216e+06	3.62201e+06	3.78422e+06	3.82891e+06	4.00596e+06	4.16552e+06	4.34336e+06	4.47921e+06	4.559e+06	4.5215e+06	4.48763e+06	4.57099e+06	4.62117e+06	4.78095e+06	5.03013e+06
152	SIB	1	74	1.48736	1.3705e+06	1.29115e+06	1.29275e+06	1.23185e+06	1.21948e+06	1.19986e+06	1.20273e+06	1.33745e+06	1.27708e+06	1.3551e+06	1.39137e+06	1.45402e+06	1.47112e+06	1.56739e+06	1.6165e+06	1.70919e+06	1.78469e+06	1.83988e+06	1.9319e+06	2.08692e+06	2.24789e+06	2.38017e+06	2.54508e+06	2.74019e+06	2.83984e+06	2.9624e+06	2.96697e+06	3.10579e+06	3.24256e+06	3.2434e+06	3.39859e+06	3.50027e+06	3.58551e+06	3.70458e+06	3.83332e+06	4.00849e+06	4.22195e+06	4.27286e+06	4.3422e+06	4.39112e+06	4.43441e+06	4.4271e+06	4.52092e+06	4.6883e+06	4.86334e+06
153	SIB	1	84	1.4924	1.14712e+06	1.11502e+06	1.07891e+06	1.05061e+06	1.04549e+06	1.04732e+06	1.09511e+06	1.11147e+06	1.12182e+06	1.14562e+06	1.18219e+06	1.21454e+06	1.21059e+06	1.34893e+06	1.36828e+06	1.44415e+06	1.53446e+06	1.57548e+06	1.61565e+06	1.73462e+06	1.8871e+06	1.92255e+06	2.05478e+06	2.2737e+06	2.32385e+06	2.36277e+06	2.49136e+06	2.6559e+06	2.73936e+06	2.78947e+06	2.91825e+06	3.03491e+06	3.11332e+06	3.18169e+06	3.21938e+06	3.34105e+06	3.47614e+06	3.59629e+06	3.6163e+06	3.67828e+06	3.65655e+06	3.71418e+06	3.82358e+06	3.91862e+06	4.16895e+06
154	SIB	2	78	1.51111	1.44123e+06	1.43274e+06	1.34409e+06	1.31587e+06	1.34068e+06	1.33789e+06	1.42e+06	1.41909e+06	1.43502e+06	1.49261e+06	1.53102e+06	1.56971e+06	1.61831e+06	1.67745e+06	1.70621e+06	1.82539e+06	1.92602e+06	1.97863e+06	2.12303e+06	2.21715e+06	2.3505e+06	2.52779e+06	2.68936e+06	2.92292e+06	3.05297e+06	3.115e+06	3.24137e+06	3.3841e+06	3.48218e+06	3.51344e+06	3.61365e+06	3.67638e+06	3.87596e+06	3.90338e+06	4.02616e+06	4.19563e+06	4.39855e+06	4.51751e+06	4.56141e+06	4.53752e+06	4.54537e+06	4.65494e+06	4.71053e+06	4.86726e+06	5.04552e+06
155	SIB	2	66	1.52251	1.39716e+06	1.3212e+06	1.22837e+06	1.2299e+06	1.28872e+06	1.23366e+06	1.26116e+06	1.29603e+06	1.274e+06	1.39403e+06	1.37774e+06	1.44974e+06	1.45423e+06	1.53368e+06	1.61331e+06	1.72043e+06	1.78456e+06	1.81748e+06	1.94825e+06	2.08976e+06	2.17132e+06	2.33952e+06	2.51193e+06	2.69472e+06	2.83266e+06	2.87298e+06	2.95857e+06	3.06621e+06	3.14955e+06	3.22903e+06	3.30658e+06	3.4323e+06	3.54051e+06	3.62749e+06	3.74541e+06	3.94196e+06	4.17049e+06	4.21644e+06	4.30495e+06	4.23874e+06	4.26383e+06	4.35839e+06	4.41597e+06	4.53884e+06	4.76381e+06
156	SIB	1	62	1.58917	1.32534e+06	1.24717e+06	1.20935e+06	1.1388e+06	1.18657e+06	1.21584e+06	1.16131e+06	1.20159e+06	1.19533e+06	1.29029e+06	1.28643e+06	1.31648e+06	1.36588e+06	1.42756e+06	1.50205e+06	1.5917e+06	1.61503e+06	1.7235e+06	1.82181e+06	2.0031e+06	2.09263e+06	2.09749e+06	2.3067e+06	2.37905e+06	2.53507e+06	2.63084e+06	2.70138e+06	2.86229e+06	2.99952e+06	3.04513e+06	3.16113e+06	3.32854e+06	3.45269e+06	3.50505e+06	3.50655e+06	3.6597e+06	3.8497e+06	3.92016e+06	3.97377e+06	4.03186e+06	4.01001e+06	4.01475e+06	4.16043e+06	4.28349e+06	4.48862e+06
157	SIB	2	69	1.68562	1.31204e+06	1.27064e+06	1.19367e+06	1.15344e+06	1.16287e+06	1.14529e+06	1.2485e+06	1.20755e+06	1.28898e+06	1.28738e+06	1.29684e+06	1.35575e+06	1.37866e+06	1.44026e+06	1.52064e+06	1.62345e+06	1.64962e+06	1.79677e+06	1.86817e+06	2.00536e+06	2.05738e+06	2.2367e+06	2.37775e+06	2.54788e+06	2.70588e+06	2.68426e+06	2.87104e+06	2.9014e+06	3.02035e+06	3.1385e+06	3.19478e+06	3.31625e+06	3.53704e+06	3.5344e+06	3.68386e+06	3.83587e+06	4.06268e+06	4.16451e+06	4.12628e+06	4.16946e+06	4.19991e+06	4.20518e+06	4.22953e+06	4.45135e+06	4.67226e+06
158	SIB	1	23	1.68829	1.60391e+06	1.54393e+06	1.46503e+06	1.49586e+06	1.48729e+06	1.53251e+06	1.55397e+06	1.56391e+06	1.63883e+06	1.7322e+06	1.71602e+06	1.74893e+06	1.83273e+06	1.88637e+06	2.05496e+06	2.08899e+06	2.1679e+06	2.26559e+06	2.41805e+06	2.56588e+06	2.74124e+06	2.832e+06	3.0009e+06	3.17497e+06	3.29863e+06	3.37485e+06	3.55345e+06	3.6845e+06	3.84288e+06	3.9498e+06	4.11356e+06	4.28531e+06	4.44306e+06	4.46065e+06	4.4774e+06	4.71385e+06	4.90959e+06	5.03675e+06	5.0739e+06	5.17667e+06	5.18214e+06	5.32032e+06	5.32545e+06	5.5155e+06	5.75632e+06
159	SIB	1	60	1.99754	1.39655e+06	1.37404e+06	1.28726e+06	1.30765e+06	1.33958e+06	1.28263e+06	1.31021e+06	1.34174e+06	1.32564e+06	1.40505e+06	1.47579e+06	1.54837e+06	1.58854e+06	1.63317e+06	1.68728e+06	1.79917e+06	1.85961e+06	1.9319e+06	2.09467e+06	2.16258e+06	2.25404e+06	2.44167e+06	2.57286e+06	2.69585e+06	2.85621e+06	2.89208e+06	3.07686e+06	3.24352e+06	3.37223e+06	3.40619e+06	3.50446e+06	3.70465e+06	3.82947e+06	3.89361e+06	3.8854e+06	4.07268e+06	4.26866e+06	4.41355e+06	4.43477e+06	4.46791e+06	4.59067e+06	4.61268e+06	4.64123e+06	4.79645e+06	5.03084e+06
160	SIB	1	68	2.26223	1.45028e+06	1.36316e+06	1.3496e+06	1.31017e+06	1.33624e+06	1.32485e+06	1.35906e+06	1.38397e+06	1.38868e+06	1.47375e+06	1.52265e+06	1.50648e+06	1.58677e+06	1.64502e+06	1.76252e+06	1.81145e+06	1.88456e+06	2.02952e+06	2.09354e+06	2.21321e+06	2.37289e+06	2.51883e+06	2.65954e+06	2.85107e+06	2.94768e+06	3.05928e+06	3.20044e+06	3.36314e+06	3.436e+06	3.49821e+06	3.59593e+06	3.72944e+06	3.8967e+06	4.00694e+06	4.03176e+06	4.26894e+06	4.42742e+06	4.52248e+06	4.59309e+06	4.60568e+06	4.63893e+06	4.67301e+06	4.79527e+06	4.90029e+06	5.16653e+06
161	SIB	1	56	2.29227	1.40897e+06	1.37941e+06	1.33904e+06	1.30633e+06	1.28185e+06	1.30307e+06	1.28641e+06	1.34333e+06	1.39693e+06	1.40086e+06	1.4641e+06	1.53442e+06	1.51088e+06	1.62346e+06	1.67164e+06	1.7631e+06	1.829e+06	1.90364e+06	1.99882e+06	2.15811e+06	2.2567e+06	2.36688e+06	2.51178e+06	2.67699e+06	2.78733e+06	2.84045e+06	2.91108e+06	3.09003e+06	3.24696e+06	3.29628e+06	3.36174e+06	3.55417e+06	3.70203e+06	3.70916e+06	3.80146e+06	3.96493e+06	4.14031e+06	4.27162e+06	4.27352e+06	4.36478e+06	4.36469e+06	4.40732e+06	4.53056e+06	4.64854e+06	4.83792e+06
162	SIB	1	55	2.33569	1.39173e+06	1.34757e+06	1.26605e+06	1.22342e+06	1.23576e+06	1.246e+06	1.33231e+06	1.38851e+06	1.34716e+06	1.40004e+06	1.44509e+06	1.4816e+06	1.56386e+06	1.64677e+06	1.67885e+06	1.76473e+06	1.84577e+06	1.94994e+06	2.01438e+06	2.16281e+06	2.32117e+06	2.42787e+06	2.56869e+06	2.77957e+06	2.91448e+06	3.00052e+06	3.09575e+06	3.25451e+06	3.35106e+06	3.44747e+06	3.55689e+06	3.71309e+06	3.79036e+06	3.82316e+06	3.91946e+06	4.10068e+06	4.2271e+06	4.37529e+06	4.45853e+06	4.49646e+06	4.54005e+06	4.59244e+06	4.61941e+06	4.76495e+06	4.99296e+06
163	SIB	2	70	2.55983	1.38517e+06	1.37981e+06	1.26718e+06	1.27563e+06	1.257e+06	1.28934e+06	1.29158e+06	1.2907e+06	1.37064e+06	1.40307e+06	1.45592e+06	1.41171e+06	1.5609e+06	1.58668e+06	1.68492e+06	1.77922e+06	1.82346e+06	1.85031e+06	2.02547e+06	2.13778e+06	2.26945e+06	2.35969e+06	2.47863e+06	2.59322e+06	2.80047e+06	2.8481e+06	2.93115e+06	3.1528e+06	3.25514e+06	3.31024e+06	3.47054e+06	3.62493e+06	3.73616e+06	3.73119e+06	3.80454e+06	3.91745e+06	4.13129e+06	4.18888e+06	4.28482e+06	4.34497e+06	4.41617e+06	4.40744e+06	4.48207e+06	4.62611e+06	4.82066e+06
164	SIB	2	75	2.67675	1.33581e+06	1.32155e+06	1.19344e+06	1.19318e+06	1.22732e+06	1.22854e+06	1.19437e+06	1.22365e+06	1.26009e+06	1.33138e+06	1.33572e+06	1.39445e+06	1.40047e+06	1.52024e+06	1.57057e+06	1.60252e+06	1.67803e+06	1.78254e+06	1.86514e+06	2.00105e+06	2.14248e+06	2.17876e+06	2.38942e+06	2.53266e+06	2.629e+06	2.7047e+06	2.79424e+06	3.00217e+06	3.15144e+06	3.17469e+06	3.26737e+06	3.39015e+06	3.54039e+06	3.54411e+06	3.59395e+06	3.72416e+06	3.93565e+06	4.05093e+06	4.08144e+06	4.14341e+06	4.1817e+06	4.16167e+06	4.23833e+06	4.41842e+06	4.66034e+06
165	SIB	2	90	2.7563	1.36995e+06	1.3226e+06	1.23114e+06	1.25462e+06	1.2784e+06	1.22925e+06	1.30127e+06	1.33585e+06	1.34667e+06	1.39922e+06	1.42872e+06	1.4793e+06	1.51814e+06	1.54414e+06	1.64171e+06	1.72243e+06	1.72513e+06	1.86731e+06	1.98537e+06	2.1273e+06	2.27392e+06	2.40213e+06	2.51347e+06	2.7354e+06	2.83152e+06	2.94127e+06	3.02253e+06	3.12569e+06	3.28141e+06	3.34695e+06	3.40125e+06	3.54048e+06	3.67319e+06	3.74129e+06	3.88578e+06	4.07906e+06	4.24739e+06	4.36838e+06	4.37084e+06	4.3668e+06	4.44298e+06	4.43116e+06	4.51277e+06	4.71962e+06	4.9368e+06
166	SIB	1	64	2.7907	1.23378e+06	1.19511e+06	1.1717e+06	1.10926e+06	1.16575e+06	1.13445e+06	1.18006e+06	1.21952e+06	1.20283e+06	1.2598e+06	1.27011e+06	1.30801e+06	1.39072e+06	1.44647e+06	1.51896e+06	1.54533e+06	1.5692e+06	1.67865e+06	1.77867e+06	1.88198e+06	2.03116e+06	2.1136e+06	2.28758e+06	2.4439e+06	2.43107e+06	2.54732e+06	2.6736e+06	2.82924e+06	2.84316e+06	2.96801e+06	3.04708e+06	3.20511e+06	3315458	3.30382e+06	3.43022e+06	3.63421e+06	3.77972e+06	3.87684e+06	3.89108e+06	3.90183e+06	3.90883e+06	3.92887e+06	4.09402e+06	4.1339e+06	4.33278e+06
167	SIB	1	63	2.7907	1.31287e+06	1.26312e+06	1.15415e+06	1.19269e+06	1.22641e+06	1.22091e+06	1.22964e+06	1.22528e+06	1.31576e+06	1.33049e+06	1.34689e+06	1.41339e+06	1.48686e+06	1.57389e+06	1.58691e+06	1.6928e+06	1.79936e+06	1.85592e+06	1.96855e+06	2.11134e+06	2.19498e+06	2.37536e+06	2.5311e+06	2.7349e+06	2.86079e+06	2.90518e+06	2.97738e+06	2.99911e+06	3.15904e+06	3.23042e+06	3.29152e+06	3.47554e+06	3.6106e+06	3.66446e+06	3.89993e+06	4.06844e+06	4.24843e+06	4.31287e+06	4.33148e+06	4.33755e+06	4.37632e+06	4.37964e+06	4.4517e+06	4.68688e+06	4.91893e+06
168	SIB	1	64	2.7907	1.42725e+06	1.35037e+06	1.33546e+06	1.24061e+06	1.26687e+06	1.27397e+06	1.30056e+06	1.33223e+06	1.35112e+06	1.39355e+06	1.49389e+06	1.50164e+06	1.56312e+06	1.5997e+06	1.65139e+06	1.78604e+06	1.83629e+06	1.89166e+06	2.04822e+06	2.16012e+06	2.3229e+06	2.45063e+06	2.58041e+06	2.82496e+06	2.92455e+06	3.07046e+06	3.149e+06	3.26571e+06	3.36989e+06	3.42545e+06	3.50521e+06	3.64836e+06	3.71583e+06	3.80066e+06	3.95062e+06	4.08203e+06	4.31644e+06	4.42081e+06	4.43873e+06	4.47895e+06	4.5543e+06	4.58379e+06	4.62011e+06	4.81054e+06	5.00042e+06
169	SIB	1	54	3.09119	1.40727e+06	1.31778e+06	1.25968e+06	1.23482e+06	1.19576e+06	1.24067e+06	1.2488e+06	1.29337e+06	1.31311e+06	1.33246e+06	1.38983e+06	1.43318e+06	1.46351e+06	1.43199e+06	1.57171e+06	1.61622e+06	1.718e+06	1.74093e+06	1.91703e+06	2.02856e+06	2.13832e+06	2.34276e+06	2.53234e+06	2.64494e+06	2.73253e+06	2.88037e+06	2.95196e+06	3.08674e+06	3.24711e+06	3.25745e+06	3.3241e+06	3.51858e+06	3.68156e+06	3.72161e+06	3.8109e+06	3965396	4.14413e+06	4.22449e+06	4.31972e+06	4.31937e+06	4.35405e+06	4.37698e+06	4.44215e+06	4.6264e+06	4.83932e+06
170	SIB	1	71	3.12862	1.33765e+06	1.28853e+06	1.25962e+06	1.17198e+06	1.16872e+06	1.14973e+06	1.19611e+06	1.273e+06	1.29009e+06	1.30791e+06	1.37352e+06	1.42435e+06	1.42457e+06	1.51063e+06	1.56701e+06	1.63323e+06	1.66928e+06	1.74801e+06	1.90487e+06	2.01284e+06	2.12065e+06	2.21569e+06	2.4132e+06	2.54957e+06	2.6818e+06	2.72561e+06	2.82369e+06	2.97912e+06	3.12697e+06	3.15742e+06	3.25116e+06	3.39462e+06	3.48776e+06	3.51185e+06	3.60218e+06	3.73186e+06	3.86331e+06	4.02305e+06	4.00951e+06	4.07609e+06	4.09562e+06	4.15924e+06	4.19124e+06	4.36093e+06	4.55823e+06
171	SIB	1	52	3.25506	1.41421e+06	1.34109e+06	1.25911e+06	1.27309e+06	1.24702e+06	1.31569e+06	1.28141e+06	1.31013e+06	1.35682e+06	1.36831e+06	1.4246e+06	1.52115e+06	1.50359e+06	1.60914e+06	1.67949e+06	1.72419e+06	1.83025e+06	1.85735e+06	2.08277e+06	2.23664e+06	2.27744e+06	2.3625e+06	2.47315e+06	2.59359e+06	2.71118e+06	2.7917e+06	2.96205e+06	3.18835e+06	3.28305e+06	3.38931e+06	3.49846e+06	3.6426e+06	3.78633e+06	3.75844e+06	3.83431e+06	3.91581e+06	4.106e+06	4.19155e+06	4.26508e+06	4.34997e+06	4.44628e+06	4.45052e+06	4.54569e+06	4.64982e+06	4.75391e+06
172	SIB	2	62	3.4863	1.40046e+06	1.28846e+06	1.29063e+06	1.27806e+06	1.29944e+06	1.33738e+06	1.30735e+06	1.35666e+06	1.38628e+06	1.40643e+06	1.46796e+06	1.47596e+06	1.57831e+06	1.63898e+06	1.71959e+06	1.87278e+06	1.89347e+06	1.94375e+06	2.01295e+06	2.15395e+06	2.27773e+06	2.37057e+06	2.51247e+06	2.66468e+06	2.77582e+06	2.84657e+06	3.00439e+06	3.12545e+06	3.20713e+06	3.29826e+06	3.37498e+06	3.52731e+06	3.58049e+06	3.57881e+06	3.73342e+06	3.82285e+06	4.0331e+06	4.15985e+06	4.18231e+06	4.23676e+06	4.31228e+06	4.3469e+06	4.3783e+06	4.47482e+06	4.71212e+06
173	SIB	2	59	3.49576	1.49255e+06	1.39634e+06	1.37762e+06	1.34194e+06	1.39719e+06	1.31251e+06	1.37483e+06	1.38862e+06	1.39875e+06	1.54439e+06	1.47115e+06	1.57044e+06	1.66169e+06	1.68266e+06	1.81202e+06	1.81247e+06	1.96537e+06	2.0102e+06	2.16739e+06	2.28689e+06	2.3216e+06	2.50268e+06	2.66236e+06	2.80678e+06	2.91304e+06	3.02336e+06	3.12871e+06	3.3e+06	3.42982e+06	3.49543e+06	3.59886e+06	3.79965e+06	3.95611e+06	3.92205e+06	3.98505e+06	4.14388e+06	4.36756e+06	4.46639e+06	4.58063e+06	4.58072e+06	4.58571e+06	4.67125e+06	4.7519e+06	4.89601e+06	5.08672e+06
174	SIB	1	66	3.49685	1.37548e+06	1.27632e+06	1.24383e+06	1.25779e+06	1.20048e+06	1.23708e+06	1.26621e+06	1.2898e+06	1.36955e+06	1.40228e+06	1.40888e+06	1.3726e+06	1.49042e+06	1.5699e+06	1.60184e+06	1.73517e+06	1.82665e+06	1.84036e+06	1.99929e+06	2.13333e+06	2.22272e+06	2.34715e+06	2.54888e+06	2.62743e+06	2.76605e+06	2.78522e+06	2.92132e+06	3.08208e+06	3.24097e+06	3.31872e+06	3.43515e+06	3.6054e+06	3.71456e+06	3.69641e+06	3.79381e+06	3.90838e+06	4.14187e+06	4.25107e+06	4.31911e+06	4.34358e+06	4.39191e+06	4.37133e+06	4.44535e+06	4.63618e+06	4.80981e+06
175	SIB	1	53	3.73796	1.52294e+06	1.52797e+06	1.43002e+06	1.42846e+06	1.42486e+06	1.42736e+06	1.4352e+06	1.51138e+06	1.51831e+06	1.54917e+06	1.62168e+06	1.64062e+06	1.74964e+06	1.79054e+06	1.85676e+06	1.9499e+06	2.02545e+06	2.13113e+06	2.2846e+06	2.43349e+06	2.48023e+06	2.60881e+06	2.68401e+06	2.79872e+06	2.93772e+06	2.97776e+06	3.20001e+06	3.44514e+06	3.59313e+06	3.63716e+06	3.75742e+06	3.92806e+06	4.05734e+06	4.08507e+06	4.08403e+06	4.23548e+06	4.3963e+06	4.54053e+06	4.60206e+06	4.6828e+06	4.76791e+06	4.77963e+06	4.92473e+06	4.99458e+06	5.23621e+06
176	SIB	2	63	3.87597	1.38422e+06	1.36714e+06	1.31028e+06	1.26138e+06	1.27126e+06	1.27014e+06	1.34922e+06	1.32439e+06	1.31512e+06	1.39244e+06	1.41752e+06	1.44288e+06	1.50604e+06	1.58464e+06	1.64794e+06	1.6841e+06	1.76899e+06	1.91225e+06	1.97436e+06	2.09675e+06	2.2651e+06	2.35983e+06	2.52132e+06	2.76626e+06	2.8246e+06	2.95281e+06	2.98731e+06	3.15118e+06	3.24067e+06	3.37528e+06	3.4018e+06	3.54171e+06	3.67177e+06	3.75215e+06	3.82817e+06	4.01528e+06	4.20088e+06	4.3145e+06	4.38194e+06	4.41447e+06	4.38514e+06	4.46424e+06	4.52868e+06	4.67182e+06	4.83335e+06
177	SIB	2	73	4.07956	1.31416e+06	1.30836e+06	1.22683e+06	1.20513e+06	1.24889e+06	1.28735e+06	1.31188e+06	1.28913e+06	1.34235e+06	1.34436e+06	1.36111e+06	1.41393e+06	1.49758e+06	1.54818e+06	1.65012e+06	1.67197e+06	1.73821e+06	1.84856e+06	1.90644e+06	2.0471e+06	2.19246e+06	2.36719e+06	2.48761e+06	2.68976e+06	2.7948e+06	2.96497e+06	3.00735e+06	3.08821e+06	3.16563e+06	3.26057e+06	3.37873e+06	3.45879e+06	3.59768e+06	3.62472e+06	3.73552e+06	3.97534e+06	4.20917e+06	4.21768e+06	4.31542e+06	4.24276e+06	4.25719e+06	4.33977e+06	4.38482e+06	4.58992e+06	4.78535e+06
178	SIB	1	44	4.13611	1.41451e+06	1.29734e+06	1.29175e+06	1.32649e+06	1.28784e+06	1.25849e+06	1.3562e+06	1.32008e+06	1.40873e+06	1.41672e+06	1.46471e+06	1.47066e+06	1.55353e+06	1.65026e+06	1.69277e+06	1.79471e+06	1.8255e+06	1.91942e+06	2.04388e+06	2.18841e+06	2.23866e+06	2.44863e+06	2.6116e+06	2.82595e+06	2.92654e+06	2.96848e+06	3.07344e+06	3.17159e+06	3.22427e+06	3.26966e+06	3.34384e+06	3.49525e+06	3.6204e+06	3.69418e+06	3.90352e+06	4.07482e+06	4.2224e+06	4.31783e+06	4.35677e+06	4.36307e+06	4.42526e+06	4.48462e+06	4.57561e+06	4.61126e+06	4.86535e+06
179	SIB	1	66	4.39159	1.46499e+06	1.40192e+06	1.34636e+06	1.34409e+06	1.32121e+06	1.36368e+06	1.3855e+06	1.41908e+06	1.41447e+06	1.50198e+06	1.5525e+06	1.54453e+06	1.64835e+06	1.68767e+06	1.73136e+06	1.8422e+06	1.94447e+06	2.02688e+06	2.1427e+06	2.33061e+06	2.36052e+06	2.51714e+06	2.70843e+06	2.88477e+06	2.99628e+06	3.05232e+06	3.1689e+06	3.33932e+06	3.48239e+06	3.51211e+06	3.66394e+06	3.79797e+06	3.92224e+06	3.90114e+06	4.04094e+06	4.1951e+06	4.37472e+06	4.47262e+06	4.59691e+06	4.52572e+06	4.64736e+06	4.60975e+06	4.69648e+06	4.88074e+06	5.12579e+06
180	SIB	2	74	4.4273	1.3535e+06	1.2629e+06	1.12905e+06	1.14093e+06	1.17913e+06	1.1996e+06	1.18221e+06	1.25202e+06	1.28975e+06	1.2566e+06	1.33975e+06	1.31635e+06	1.41433e+06	1.48005e+06	1.48815e+06	1.53486e+06	1.60793e+06	1.74726e+06	1.86937e+06	1.99327e+06	2.12857e+06	2.22004e+06	2.37005e+06	2.5416e+06	2.60855e+06	2.69282e+06	2.84335e+06	2.98621e+06	3.05417e+06	3.12696e+06	3.22283e+06	3.39534e+06	3.53715e+06	3.57102e+06	3.66079e+06	3.80238e+06	3.9879e+06	4.10406e+06	4.18439e+06	4.13295e+06	4.15571e+06	4.24957e+06	4.34246e+06	4.44488e+06	4.68233e+06
181	SIB	2	59	4.5256	1.39173e+06	1.30244e+06	1.25493e+06	1.24077e+06	1.24086e+06	1.29091e+06	1.25579e+06	1.2999e+06	1.34314e+06	1.3627e+06	1.42427e+06	1.49378e+06	1.47036e+06	1.56836e+06	1.63869e+06	1.76102e+06	1.76681e+06	1.78737e+06	1.94264e+06	2.08015e+06	2.20648e+06	2.35664e+06	2.49297e+06	2.62016e+06	2.74852e+06	2.80466e+06	2.89415e+06	3.08159e+06	3.23977e+06	3.29596e+06	3.41982e+06	3.54316e+06	3.66917e+06	3.68917e+06	3.78473e+06	3.9318e+06	4.09859e+06	4.23336e+06	4.28522e+06	4.26795e+06	4.30315e+06	4.35885e+06	4.45093e+06	4.54031e+06	4.73761e+06
182	SIB	2	48	4.66515	1.49364e+06	1.48828e+06	1.43119e+06	1.33915e+06	1.41142e+06	1.4058e+06	1.38883e+06	1.39219e+06	1.48025e+06	1.53234e+06	1.59761e+06	1.58781e+06	1.67966e+06	1.73686e+06	1.7914e+06	1.92905e+06	1.98039e+06	2.03272e+06	2.16759e+06	2.31919e+06	2.44139e+06	2.61309e+06	2.76743e+06	2.89982e+06	3.03537e+06	3.18964e+06	3.30743e+06	3.43792e+06	3.57039e+06	3.67484e+06	3.76681e+06	3.86265e+06	3.97536e+06	4.02417e+06	4.14643e+06	4.32632e+06	4.507e+06	4.61772e+06	4.64032e+06	4.72615e+06	4.70252e+06	4.73864e+06	4.81482e+06	5.02121e+06	5.23137e+06
183	SIB	2	78	4.98216	1.4318e+06	1.37115e+06	1.3325e+06	1.31308e+06	1.31309e+06	1.31249e+06	1.3395e+06	1.39597e+06	1.38368e+06	1.48436e+06	1.51172e+06	1.51406e+06	1.56177e+06	1.64353e+06	1.72726e+06	1.83667e+06	1.90458e+06	2.00029e+06	2.14343e+06	2.2302e+06	2.40878e+06	2.57195e+06	2.7596e+06	2.98405e+06	3.03901e+06	3.15423e+06	3.19573e+06	3.29253e+06	3.40716e+06	3.47641e+06	3.56601e+06	3.75691e+06	3.83812e+06	3.8738e+06	4.11143e+06	4.24389e+06	4.45646e+06	4.645e+06	4.6469e+06	4.64604e+06	4.72148e+06	4.69022e+06	4.86285e+06	4.95097e+06	5.20213e+06
184	SIB	1	70	5.42987	1.40997e+06	1.30401e+06	1.23329e+06	1.27214e+06	1.28068e+06	1.29584e+06	1.31956e+06	1.28504e+06	1.38489e+06	1.3941e+06	1.44612e+06	1.46666e+06	1.5612e+06	1.60021e+06	1.63991e+06	1.75368e+06	1.82678e+06	1.88879e+06	1.98154e+06	2.08778e+06	2.26332e+06	2.39887e+06	2.60078e+06	2.8585e+06	2.9093e+06	3.00634e+06	3.09839e+06	3.21719e+06	3.23814e+06	3.36533e+06	3.3945e+06	3.55407e+06	3.65084e+06	3.72945e+06	3.85279e+06	4.03635e+06	4.26993e+06	4.38576e+06	4.4181e+06	4.38328e+06	4.4595e+06	4.43277e+06	4.51293e+06	4.69748e+06	4.97926e+06
185	SIB	1	74	5.42987	1.40144e+06	1.37831e+06	1.26164e+06	1.2975e+06	1.31133e+06	1.36027e+06	1.3794e+06	1.34048e+06	1.36689e+06	1.48804e+06	1.4462e+06	1.54905e+06	1.59621e+06	1.65668e+06	1.72611e+06	1.79178e+06	1.91886e+06	1.95356e+06	2.07165e+06	2.17666e+06	2.38232e+06	2.42989e+06	2.69284e+06	2.93579e+06	3.01948e+06	3.09064e+06	3.18775e+06	3.24422e+06	3.34427e+06	3.38396e+06	3.46369e+06	3.60052e+06	3.73345e+06	3.885e+06	3.95216e+06	4.1848e+06	4.39275e+06	4.55036e+06	4.52665e+06	4.51263e+06	4.55859e+06	4.57263e+06	4.72972e+06	4.85173e+06	5.04284e+06
186	SIB	2	76	5.61967	1.38465e+06	1.36055e+06	1.33278e+06	1.25819e+06	1.28349e+06	1.33906e+06	1.2817e+06	1.34992e+06	1.36488e+06	1.40062e+06	1.4444e+06	1.46522e+06	1.55195e+06	1.56966e+06	1.65407e+06	1.77677e+06	1.83074e+06	1.89062e+06	2.00796e+06	2.13702e+06	2.27584e+06	2.39302e+06	2.50316e+06	2.69974e+06	2.76226e+06	2.85259e+06	3.00991e+06	3.17108e+06	3.31067e+06	3.43639e+06	3.45677e+06	3.58058e+06	3.67721e+06	3.80927e+06	3.86384e+06	4.08079e+06	4.21386e+06	4.36671e+06	4.40452e+06	4.4057e+06	4.4312e+06	4.45905e+06	4.56496e+06	4.73275e+06	4.99446e+06
187	SIB	2	63	5.88088	1.39124e+06	1.25927e+06	1.20662e+06	1.21862e+06	1.2978e+06	1.2715e+06	1.28312e+06	1.28391e+06	1.38404e+06	1.41703e+06	1.46906e+06	1.45452e+06	1.50258e+06	1.56019e+06	1.61876e+06	1.69838e+06	1.80724e+06	1.86654e+06	2.02526e+06	2.12709e+06	2.27516e+06	2.38396e+06	2.5946e+06	2.73674e+06	2.86882e+06	2.91652e+06	2.99193e+06	3.12428e+06	3.18373e+06	3.26834e+06	3.309e+06	3.50793e+06	3.60291e+06	3.67027e+06	3.77918e+06	3.96671e+06	4.14711e+06	4.31148e+06	4.30265e+06	4.3261e+06	4.37463e+06	4.39536e+06	4.50476e+06	4.60896e+06	4.76367e+06
188	SIB	1	56	6.07136	1.24591e+06	1.22104e+06	1.15763e+06	1.11987e+06	1.18642e+06	1.18466e+06	1.22849e+06	1.19045e+06	1.22718e+06	1.32825e+06	1.29867e+06	1.36677e+06	1.36673e+06	1.4135e+06	1.49534e+06	1.64685e+06	1.72003e+06	1.77101e+06	1.85651e+06	1.95551e+06	2.04355e+06	2.1745e+06	2.27881e+06	2.3885e+06	2.54456e+06	2.59851e+06	2.72628e+06	2.9015e+06	3.04733e+06	3.08531e+06	3.19706e+06	3.27595e+06	3.43083e+06	3.37305e+06	3.38215e+06	3.56987e+06	3.75489e+06	3.90979e+06	3.97119e+06	3.9525e+06	4.01536e+06	4.09943e+06	4.1677e+06	4.29784e+06	4.4412e+06
189	SIB	2	70	6.23131	1.34617e+06	1.31476e+06	1.25145e+06	1.22318e+06	1.20383e+06	1.28937e+06	1.2673e+06	1.28235e+06	1.32429e+06	1.34609e+06	1.44745e+06	1.48681e+06	1.51561e+06	1.53444e+06	1.60465e+06	1.74574e+06	1.80627e+06	1.86225e+06	1.96383e+06	2.10539e+06	2.17054e+06	2.34906e+06	2.58074e+06	2.72771e+06	2.84516e+06	2.90755e+06	3.01255e+06	3.11397e+06	3.16825e+06	3.21297e+06	3.29885e+06	3.45041e+06	3.53975e+06	3.65418e+06	3.77212e+06	3.94118e+06	4.04604e+06	4.21069e+06	4.20274e+06	4.23064e+06	4.25767e+06	4.30574e+06	4.35004e+06	4.57343e+06	4.8254e+06
190	SIB	2	59	6.29724	1.55561e+06	1.45359e+06	1.49863e+06	1.47849e+06	1.45584e+06	1.52654e+06	1.51251e+06	1.56914e+06	1.58531e+06	1.66565e+06	1.70018e+06	1.73068e+06	1.78672e+06	1.86813e+06	1.92931e+06	2.02617e+06	2.07086e+06	2.13746e+06	2.30456e+06	2.44265e+06	2.52693e+06	2.72346e+06	2.89734e+06	3.07499e+06	3.23471e+06	3.34121e+06	3.45086e+06	3.56755e+06	3.69227e+06	3.76044e+06	3.88879e+06	3.92324e+06	4.08891e+06	4.14433e+06	4.26244e+06	4.44278e+06	4.58616e+06	4.6682e+06	4.81826e+06	4.82346e+06	4.8338e+06	4.86657e+06	5.0193e+06	5.15431e+06	5.37822e+06
191	SIB	1	74	6.52537	1.43172e+06	1.34748e+06	1.33261e+06	1.34387e+06	1.36289e+06	1.34787e+06	1.35847e+06	1.45979e+06	1.41256e+06	1.46222e+06	1.53589e+06	1.52312e+06	1.5608e+06	1.65318e+06	1.7355e+06	1.81738e+06	1.87889e+06	1.93161e+06	1.99999e+06	2.20492e+06	2.30612e+06	2.49869e+06	2.68203e+06	2.86301e+06	3.00161e+06	3.04624e+06	3.09474e+06	3.17249e+06	3.37071e+06	3.36804e+06	3.4335e+06	3.57393e+06	3.67656e+06	3.72778e+06	3.90498e+06	3.98655e+06	4.22244e+06	4.32276e+06	4.44308e+06	4.44461e+06	4.48877e+06	4.4486e+06	4.5025e+06	4.7165e+06	4.91345e+06
192	SIB	2	61	6.70075	1.40455e+06	1.36354e+06	1.31251e+06	1.3537e+06	1.30301e+06	1.37912e+06	1.40671e+06	1.37525e+06	1.4241e+06	1.48772e+06	1.45179e+06	1.58252e+06	1.58714e+06	1.68986e+06	1.72231e+06	1.82872e+06	1.86245e+06	1.9661e+06	2.05503e+06	2.20457e+06	2.33482e+06	2.48489e+06	2.609e+06	2.82442e+06	2.87682e+06	3.02065e+06	3.13606e+06	3.3196e+06	3.40329e+06	3.4654e+06	3.62001e+06	3.72111e+06	3.8065e+06	3.91222e+06	3.93907e+06	4.12457e+06	4.3344e+06	4.40653e+06	4.50235e+06	4.53051e+06	4.56547e+06	4.56898e+06	4.71428e+06	4.86602e+06	5.05292e+06
193	SIB	2	59	6.71475	1.50893e+06	1.49546e+06	1.43402e+06	1.42153e+06	1.38483e+06	1.41307e+06	1.42715e+06	1.53936e+06	1.58717e+06	1.60326e+06	1.67833e+06	1.70574e+06	1.75655e+06	1.79285e+06	1.88963e+06	1.99221e+06	2.07111e+06	2.17181e+06	2.30232e+06	2.44916e+06	2.54599e+06	2.68854e+06	2.83118e+06	3.06635e+06	3.21686e+06	3.30007e+06	3.44317e+06	3.56436e+06	3.67404e+06	3.68876e+06	3.86181e+06	3.95362e+06	4.11845e+06	4.19569e+06	4.28082e+06	4.48119e+06	4.63813e+06	4.80304e+06	4.87543e+06	4.81449e+06	4.91702e+06	4.96386e+06	5.08135e+06	5.18015e+06	5.41718e+06
194	SIB	2	65	6.85055	1.18244e+06	1.06862e+06	1.01183e+06	995907	1.00311e+06	1.00607e+06	1.05474e+06	1.07256e+06	1.11675e+06	1.13479e+06	1.16271e+06	1.21628e+06	1.2725e+06	1.32622e+06	1.29147e+06	1.45486e+06	1.54766e+06	1.61973e+06	1.67485e+06	1.88396e+06	1.98899e+06	2.0623e+06	2.27097e+06	2.44363e+06	2.55521e+06	2.6665e+06	2.7374e+06	2.84192e+06	2.94391e+06	2.95495e+06	3.09646e+06	3.28329e+06	3.35321e+06	3.41013e+06	3.4956e+06	3.71712e+06	3.87497e+06	4.02537e+06	4.05547e+06	4.04282e+06	4.11016e+06	4.10945e+06	4.19221e+06	4.30262e+06	4.53329e+06
195	SIB	2	62	7.74954	1.46663e+06	1.40257e+06	1.33172e+06	1.31288e+06	1.29143e+06	1.2998e+06	1.35195e+06	1.37788e+06	1.36966e+06	1.39931e+06	1.40718e+06	1.5154e+06	1.51735e+06	1.56212e+06	1.6308e+06	1.73384e+06	1.79446e+06	1.90448e+06	2.02832e+06	2.20719e+06	2.30372e+06	2.40819e+06	2.63929e+06	2.79175e+06	2.90789e+06	2.91106e+06	3.0436e+06	3.19963e+06	3.30881e+06	3.38291e+06	3.48221e+06	3.64121e+06	3.79212e+06	3.8375e+06	3.91156e+06	4.02584e+06	4.30163e+06	4.46859e+06	4.49469e+06	4.47626e+06	4.51667e+06	4.58681e+06	4.63349e+06	4.78695e+06	4.9934e+06
196	SIB	2	66	8.55616	1.39393e+06	1.2814e+06	1.2528e+06	1.26597e+06	1.28989e+06	1.31542e+06	1.29743e+06	1.33156e+06	1.36972e+06	1.4565e+06	1.4576e+06	1.47778e+06	1.50499e+06	1.60373e+06	1.65128e+06	1.70376e+06	1.82314e+06	1.90538e+06	2.01967e+06	2.14381e+06	2.2317e+06	2.35554e+06	2.51125e+06	2.66846e+06	2.77863e+06	2.89986e+06	3.00377e+06	3.17176e+06	3.29677e+06	3.31152e+06	3.43667e+06	3.56936e+06	3.73131e+06	3.74774e+06	3.8059e+06	4.01955e+06	4.14074e+06	4.32528e+06	4.29585e+06	4.34894e+06	4.38344e+06	4.43134e+06	4.51262e+06	4.66751e+06	4.9014e+06
197	SIB	1	68	9.03169	1.36204e+06	1.32643e+06	1.2303e+06	1.21484e+06	1.27422e+06	1.24651e+06	1.30786e+06	1.32607e+06	1.30173e+06	1.34146e+06	1.42647e+06	1.41971e+06	1.4615e+06	1.5169e+06	1.62266e+06	1.67925e+06	1.7178e+06	1.86834e+06	1.89748e+06	2.04803e+06	2.16724e+06	2.30227e+06	2.44898e+06	2.60291e+06	2.67226e+06	2.76589e+06	2.85027e+06	3.0287e+06	3.15748e+06	3.17136e+06	3.28092e+06	3.43328e+06	3.55554e+06	3.56236e+06	3.67018e+06	3.84127e+06	4.0341e+06	4.16718e+06	4.20627e+06	4.18127e+06	4.21289e+06	4.22033e+06	4.33978e+06	4.50135e+06	4.69091e+06
198	SIB	1	70	9.06455	1.25774e+06	1.14149e+06	1.13491e+06	1.12322e+06	1.10437e+06	1.08461e+06	1.11461e+06	1.15332e+06	1.19156e+06	1.19949e+06	1.27322e+06	1.32292e+06	1.30002e+06	1.3535e+06	1.44813e+06	1.54277e+06	1.55288e+06	1.61924e+06	1.71914e+06	1.82163e+06	1.93058e+06	2.05465e+06	2.15125e+06	2.2356e+06	2.41612e+06	2.43297e+06	2.54378e+06	2.74506e+06	2.82047e+06	2.88789e+06	3.00183e+06	3.1139e+06	3.24566e+06	3.22079e+06	3.2835e+06	3.38863e+06	3.55176e+06	3.65697e+06	3.71657e+06	3.75806e+06	3.77847e+06	3.7812e+06	3.86457e+06	3.97573e+06	4.14661e+06
199	SIB	2	84	9.61077	1.39145e+06	1.3585e+06	1.2764e+06	1.28017e+06	1.34045e+06	1.26173e+06	1.33514e+06	1.35698e+06	1.38446e+06	1.4267e+06	1.46544e+06	1.52242e+06	1.61142e+06	1.62891e+06	1.66895e+06	1.80185e+06	1.87831e+06	1.96512e+06	2.06323e+06	2.2335e+06	2.35976e+06	2.4184e+06	2.52303e+06	2.61782e+06	2.75873e+06	2.84993e+06	3.02966e+06	3.17399e+06	3.35301e+06	3449270	3.51806e+06	3.71202e+06	3.81768e+06	3.79748e+06	3.80476e+06	3.95821e+06	4.11701e+06	4.15888e+06	4.25354e+06	4.37702e+06	4.37644e+06	4.42402e+06	4.49092e+06	4.66191e+06	4.88229e+06
200	CENT	2	107.397	NA	1.28298e+06	1.29702e+06	1.25226e+06	1.25145e+06	1.23193e+06	1.25003e+06	1.25181e+06	1.24774e+06	1.31124e+06	1.35502e+06	1.37611e+06	1.42363e+06	1.4526e+06	1.48988e+06	1.58586e+06	1.6498e+06	1.76732e+06	1.86002e+06	1.99431e+06	2.05163e+06	2.16228e+06	2.30303e+06	2.48611e+06	2.59501e+06	2.72229e+06	2.86112e+06	2.94351e+06	2.98583e+06	3.18021e+06	3.18002e+06	3.25231e+06	3.39418e+06	3.48133e+06	3.55146e+06	3.6599e+06	3.79986e+06	3.96975e+06	4.08192e+06	4.12268e+06	4.09301e+06	4.12764e+06	4.17395e+06	4.24356e+06	4.39171e+06	4.58649e+06
201	CENT	1	105.825	NA	1.29999e+06	1.28253e+06	1.3349e+06	1.30009e+06	1.36205e+06	1.35854e+06	1.34811e+06	1.41475e+06	1.49508e+06	1.56277e+06	1.58297e+06	1.62042e+06	1.71439e+06	1.68576e+06	1.81353e+06	1.88086e+06	1.94677e+06	2.03383e+06	2.06188e+06	2.21333e+06	2.28134e+06	2.42227e+06	2.58738e+06	2.71217e+06	2.81161e+06	2.95388e+06	2.98425e+06	3.14715e+06	3.28762e+06	3.32691e+06	3.40492e+06	3.49977e+06	3.56072e+06	3.63047e+06	3.72633e+06	3.79369e+06	3.94116e+06	4.0272e+06	4.07833e+06	4.15445e+06	4.22888e+06	4.30133e+06	4.30072e+06	4.52695e+06	4.64394e+06
202	CENT	2	110.016	NA	1.37943e+06	1.26544e+06	1.21881e+06	1.28099e+06	1.22665e+06	1.2461e+06	1.33486e+06	1.34222e+06	1.44749e+06	1.36581e+06	1.42596e+06	1.44296e+06	1.48457e+06	1.62336e+06	1.63983e+06	1.75543e+06	1.78646e+06	1.81044e+06	2.00163e+06	2.09554e+06	2.24096e+06	2.27895e+06	2.3758e+06	2.5288e+06	2.6538e+06	2.7646e+06	2.91168e+06	3.0513e+06	3.18081e+06	3.22539e+06	3.33579e+06	3.46144e+06	3.58432e+06	3.60742e+06	3.64349e+06	3.74038e+06	3.91777e+06	4.01872e+06	4.02511e+06	4.11649e+06	4.13743e+06	4.11263e+06	4.26492e+06	4.41944e+06	4.61929e+06
203	CENT	2	109.134	NA	944216	955668	925521	901230	972720	939367	952401	959435	1.03359e+06	1.049e+06	1.08763e+06	1.12766e+06	1.1262e+06	1.18128e+06	1.30067e+06	1.26271e+06	1.39071e+06	1.41711e+06	1.48523e+06	1.60205e+06	1.67646e+06	1.76678e+06	1.85097e+06	2.00941e+06	2.122e+06	2.10385e+06	2.15311e+06	2.27213e+06	2.39623e+06	2.43037e+06	2.5131e+06	2.60301e+06	2.635e+06	2.67938e+06	2.73897e+06	2.86521e+06	2.98933e+06	3.06279e+06	3.11677e+06	3.14401e+06	3.13845e+06	3.15852e+06	3.21049e+06	3.2784e+06	3.49002e+06
204	CENT	2	106.729	NA	1.37385e+06	1.40669e+06	1.31097e+06	1.3035e+06	1.35509e+06	1.3717e+06	1.34273e+06	1.3822e+06	1.45399e+06	1.55623e+06	1.55076e+06	1.56985e+06	1.64648e+06	1.70251e+06	1.74602e+06	1.85558e+06	1.92773e+06	1.9899e+06	2.10336e+06	2.19407e+06	2.31063e+06	2.40119e+06	2.57694e+06	2.75933e+06	2.89516e+06	2.95244e+06	3.08021e+06	3.22065e+06	3.27638e+06	3.35671e+06	3.4489e+06	3.49643e+06	3.62719e+06	3.65663e+06	3.83057e+06	4.02382e+06	4.16215e+06	4.29895e+06	4.26509e+06	4.35351e+06	4.3496e+06	4.37181e+06	4.50883e+06	4.66976e+06	4.85723e+06
205	CENT	2	107.288	NA	1.37177e+06	1.30651e+06	1.19767e+06	1.22593e+06	1.20157e+06	1.2631e+06	1.23849e+06	1.30114e+06	1.3005e+06	1.35505e+06	1.42945e+06	1.41845e+06	1.44868e+06	1.55203e+06	1.54121e+06	1.69198e+06	1.69262e+06	1.78265e+06	1.96849e+06	1.99848e+06	2.13495e+06	2.23739e+06	2.41087e+06	2.57344e+06	2.70101e+06	2.76375e+06	2.83102e+06	2.92874e+06	3.04798e+06	3.10047e+06	3.19736e+06	3.30342e+06	3.40791e+06	3.46557e+06	3.56659e+06	3.72603e+06	3.91172e+06	4.00278e+06	4.04757e+06	4.05031e+06	4.02982e+06	4.08739e+06	4.17975e+06	4.33789e+06	4.47789e+06
206	CENT	2	107.526	NA	1.18887e+06	1.11976e+06	1.07203e+06	1.10606e+06	1.0886e+06	1.11801e+06	1.17165e+06	1.18216e+06	1.19749e+06	1.26966e+06	1.26392e+06	1.28671e+06	1.32978e+06	1.42377e+06	1.48754e+06	1.5463e+06	1.59327e+06	1.64008e+06	1.78789e+06	1.87004e+06	1.98694e+06	2.12387e+06	2.25153e+06	2.47339e+06	2.57783e+06	2.6211e+06	2.72038e+06	2.79083e+06	2.84867e+06	2.95891e+06	3.04542e+06	3.08155e+06	3.23775e+06	3.2725e+06	3.41504e+06	3.59073e+06	3.79046e+06	3.90307e+06	3.93726e+06	3.90245e+06	3.94571e+06	3.9761e+06	4.00379e+06	4.23364e+06	4.4111e+06
207	CENT	2	106.367	NA	1.28983e+06	1.32431e+06	1.24275e+06	1.23441e+06	1.27503e+06	1.23716e+06	1.26034e+06	1.25032e+06	1.28346e+06	1.36607e+06	1.39933e+06	1.40371e+06	1.39483e+06	1.51756e+06	1.59155e+06	1.69725e+06	1.74442e+06	1.81324e+06	1.93143e+06	2.001e+06	2.163e+06	2.21398e+06	2.48789e+06	2.57304e+06	2.70907e+06	2.78498e+06	2.81323e+06	2.94071e+06	3.09805e+06	3.16461e+06	3.20548e+06	3.30477e+06	3.43603e+06	3.51124e+06	3.63411e+06	3.77455e+06	3.9665e+06	4.08663e+06	4.08787e+06	4.10203e+06	4.03765e+06	4.1317e+06	4.22561e+06	4.37626e+06	4.60414e+06
208	CENT	2	107.595	NA	1.13476e+06	1.13114e+06	1.14134e+06	1.1612e+06	1.17159e+06	1.20887e+06	1.19419e+06	1.23273e+06	1.24586e+06	1.25079e+06	1.38473e+06	1.37719e+06	1.43152e+06	1.46949e+06	1.53406e+06	1.64599e+06	1.70507e+06	1.74236e+06	1.86827e+06	1.88241e+06	2.05705e+06	2.09996e+06	2.21263e+06	2.40023e+06	2.48244e+06	2.58139e+06	2.67429e+06	2.66582e+06	2.81807e+06	2.89388e+06	2.94958e+06	3.05589e+06	3.0939e+06	3.14906e+06	3261836	3.34717e+06	3.5046e+06	3.52226e+06	3.61819e+06	3.67609e+06	3.69529e+06	3.74135e+06	3.83444e+06	3.93733e+06	4.08968e+06
209	CENT	1	106.351	NA	1.22418e+06	1.15844e+06	1.1318e+06	1.1713e+06	1.08442e+06	1.13703e+06	1.13624e+06	1.1455e+06	1.26425e+06	1.22095e+06	1.25367e+06	1.33182e+06	1.36672e+06	1.37257e+06	1.48502e+06	1.52434e+06	1.58558e+06	1.70375e+06	1.8108e+06	1.97706e+06	2.04935e+06	2.1554e+06	2.31034e+06	2.4418e+06	2.55226e+06	2.67338e+06	2.72957e+06	2.87338e+06	2.9594e+06	3.06095e+06	3.11514e+06	3.23822e+06	3.36128e+06	3.37275e+06	3.51048e+06	3.64639e+06	3.8513e+06	3.93216e+06	4.00409e+06	3.9845e+06	4.01265e+06	4.00724e+06	4.04626e+06	4.22935e+06	4.44215e+06
210	CENT	2	107.115	NA	1.13455e+06	1.07902e+06	1.04385e+06	1.05733e+06	1.06348e+06	1.10697e+06	1.07324e+06	1.11779e+06	1.13646e+06	1.19709e+06	1.22422e+06	1.23694e+06	1.24353e+06	1.28447e+06	1.37432e+06	1.46256e+06	1.4914e+06	1.54409e+06	1.70828e+06	1.78548e+06	1.94299e+06	2.0518e+06	2.15588e+06	2.36204e+06	2.38986e+06	2.48286e+06	2.5785e+06	2.69331e+06	2.83693e+06	2.83011e+06	3.00643e+06	3.08033e+06	3.16516e+06	3.21991e+06	3.29382e+06	3.47199e+06	3.68755e+06	3.71559e+06	3.73222e+06	3.78871e+06	3.7312e+06	3.75448e+06	3.92878e+06	4.00062e+06	4.24438e+06
211	CENT	2	108.745	NA	1.3486e+06	1.34116e+06	1.35421e+06	1.28771e+06	1.35394e+06	1.32757e+06	1.3277e+06	1.42972e+06	1.43911e+06	1.52174e+06	1.50741e+06	1.56775e+06	1.66312e+06	1.72696e+06	1.74193e+06	1.85421e+06	1.93786e+06	1.99146e+06	2.13217e+06	2.25595e+06	2.39527e+06	2.53086e+06	2.77181e+06	2.85406e+06	3.015e+06	3.12651e+06	3.21531e+06	3.33936e+06	3.44143e+06	3.55597e+06	3.59388e+06	3.74141e+06	3.82598e+06	3.94672e+06	3.98804e+06	4.17518e+06	4.42442e+06	4.48368e+06	4.45204e+06	4.54952e+06	4.57612e+06	4.63371e+06	4.69199e+06	4.9145e+06	5.06026e+06
212	CENT	2	107.559	NA	1.36211e+06	1.29292e+06	1.24519e+06	1.33172e+06	1.27328e+06	1.29939e+06	1.27762e+06	1.3614e+06	1.39861e+06	1.43958e+06	1.45589e+06	1.51915e+06	1.57843e+06	1.60093e+06	1.69572e+06	1.74145e+06	1.86788e+06	1.89217e+06	2.03989e+06	2.19586e+06	2.2602e+06	2.41271e+06	2.56198e+06	2.65426e+06	2.77196e+06	2.90365e+06	3.01904e+06	3.15943e+06	3.2553e+06	3.39342e+06	3.49635e+06	3.54863e+06	3.65309e+06	3.72966e+06	3.85374e+06	3.95021e+06	4.1454e+06	4.20568e+06	4.24178e+06	4.28369e+06	4.29566e+06	4.36895e+06	4.50258e+06	4.59679e+06	4.83665e+06
213	CENT	2	106.274	NA	1.33416e+06	1.31489e+06	1.22305e+06	1.2352e+06	1.22341e+06	1.25108e+06	1.2119e+06	1.27023e+06	1.30543e+06	1.31571e+06	1.38152e+06	1.39598e+06	1.46276e+06	1.50973e+06	1.59856e+06	1.6437e+06	1.68626e+06	1.73705e+06	1.9124e+06	2.04192e+06	2.15105e+06	2.19526e+06	2.32801e+06	2.4673e+06	2.57062e+06	2.66356e+06	2.80849e+06	2.88157e+06	3.02863e+06	3.08904e+06	3.23614e+06	3.39317e+06	3.47665e+06	3.47789e+06	3.56876e+06	3.73216e+06	3.93759e+06	3.99632e+06	3.98971e+06	4.00561e+06	4.09092e+06	4.06086e+06	4.19376e+06	4.32699e+06	4.57034e+06
214	CENT	2	110.614	NA	1.15496e+06	1.15817e+06	1.04063e+06	1.07929e+06	1.13495e+06	1.09637e+06	1.12343e+06	1.14251e+06	1.13676e+06	1.22484e+06	1.27509e+06	1.27964e+06	1.37774e+06	1.37833e+06	1.45894e+06	1.49866e+06	1.66573e+06	1.68742e+06	1.74455e+06	1.8623e+06	1.96712e+06	2.13191e+06	2.32658e+06	2.50107e+06	2.63507e+06	2.68914e+06	2.76584e+06	2.86535e+06	2.94298e+06	2.97909e+06	3.05633e+06	3.18024e+06	3.27609e+06	3.3913e+06	3.54053e+06	3.67887e+06	3.89375e+06	4.007e+06	3.9805e+06	4.00263e+06	3.96586e+06	3.9809e+06	4.07485e+06	4.26128e+06	4.44737e+06
215	CENT	1	106.033	NA	1.52945e+06	1.43821e+06	1.38379e+06	1.43548e+06	1.42166e+06	1.43489e+06	1.4418e+06	1.47707e+06	1.52409e+06	1.56821e+06	1.63773e+06	1.63717e+06	1.70731e+06	1.79729e+06	1.85722e+06	1.92363e+06	1.99915e+06	2.09065e+06	2.27612e+06	2.3899e+06	2.52379e+06	2.679e+06	2.89031e+06	3.03428e+06	3.16995e+06	3.28738e+06	3.38584e+06	3.58019e+06	3.6806e+06	3650304	3.81104e+06	3.92599e+06	4.05642e+06	4.14715e+06	4.29198e+06	4.44695e+06	4.63759e+06	4.74993e+06	4.80034e+06	4.80612e+06	4.83962e+06	4.95845e+06	5.04227e+06	5.20778e+06	5.46174e+06
216	CENT	2	109.181	NA	1.25683e+06	1.2872e+06	1.2551e+06	1.16045e+06	1.22663e+06	1.23869e+06	1.24647e+06	1.2651e+06	1.30293e+06	1.33923e+06	1.32382e+06	1.34723e+06	1.39959e+06	1.42862e+06	1.52237e+06	1.63728e+06	1.67022e+06	1.73883e+06	1.78556e+06	1.8713e+06	1.91315e+06	2.08874e+06	2.22663e+06	2.37539e+06	2.44879e+06	2.57097e+06	2.63703e+06	2.76115e+06	2.86318e+06	2.86531e+06	3.00918e+06	3.06315e+06	3.17405e+06	3.15484e+06	3.24013e+06	3.37806e+06	3.51745e+06	3.64132e+06	3.68379e+06	3.69409e+06	3.65754e+06	3.70197e+06	3.8005e+06	3.93395e+06	4.14977e+06
217	CENT	2	112.288	NA	1.35649e+06	1.337e+06	1.34457e+06	1.3475e+06	1.39453e+06	1.4331e+06	1.40041e+06	1.44806e+06	1.47941e+06	1.52301e+06	1.59336e+06	1.62295e+06	1.70864e+06	1.79709e+06	1.85299e+06	1.94093e+06	2.04805e+06	2.14643e+06	2.21866e+06	2.30623e+06	2.42067e+06	2.5373e+06	2.65459e+06	2.82512e+06	2.92274e+06	3.05098e+06	3.18286e+06	3.20951e+06	3.31987e+06	3.44623e+06	3.52061e+06	3.59225e+06	3.65346e+06	3.7392e+06	3.875e+06	4.04245e+06	4.18813e+06	4.29115e+06	4.30918e+06	4.4075e+06	4.44247e+06	4.51309e+06	4.59196e+06	4.77167e+06	4.97259e+06
218	CENT	1	101.468	NA	1.12067e+06	1.10939e+06	1.10038e+06	1.10877e+06	1.17285e+06	1.10998e+06	1.11759e+06	1.21641e+06	1.20533e+06	1.25002e+06	1.26973e+06	1.30157e+06	1.37077e+06	1.41814e+06	1.51466e+06	1.58389e+06	1.67998e+06	1.79033e+06	1.84757e+06	1.95977e+06	2.11305e+06	2.17217e+06	2.2931e+06	2.5038e+06	2.55902e+06	2.68198e+06	2.77153e+06	2.85703e+06	2.96112e+06	2.97159e+06	3.04716e+06	3.20963e+06	3.21034e+06	3.34177e+06	3.52225e+06	3.69574e+06	3.7951e+06	3.96298e+06	3.99714e+06	4.06347e+06	4.08078e+06	4.11306e+06	4.17301e+06	4.30524e+06	4.46255e+06
219	CENT	2	103.425	NA	1.29566e+06	1.27727e+06	1.25731e+06	1.24881e+06	1.27299e+06	1.25296e+06	1.2408e+06	1.3347e+06	1.3657e+06	1.42098e+06	1.4092e+06	1.49182e+06	1.56288e+06	1.54428e+06	1.70813e+06	1.74469e+06	1.79386e+06	1.87028e+06	2.02857e+06	2.11145e+06	2.22593e+06	2.37845e+06	2.43922e+06	2.64962e+06	2.76549e+06	2.84957e+06	2.99764e+06	3.13112e+06	3.25263e+06	3.38853e+06	3.44096e+06	3.47795e+06	3.63652e+06	3.62097e+06	3.75399e+06	3.83849e+06	3.98883e+06	4.11296e+06	4.16836e+06	4.17165e+06	4.19092e+06	4.24527e+06	4.39174e+06	4.41907e+06	4.66175e+06
220	CENT	2	106.014	NA	1.31176e+06	1.37648e+06	1.32827e+06	1.28729e+06	1.31448e+06	1.32263e+06	1.35973e+06	1.41234e+06	1.45438e+06	1.45909e+06	1.48098e+06	1.55031e+06	1.61897e+06	1.65825e+06	1.69851e+06	1.80317e+06	1.86009e+06	1.97151e+06	2.08181e+06	2.18571e+06	2.32888e+06	2.43214e+06	2.6149e+06	2.75146e+06	2.88194e+06	2.97987e+06	3.03023e+06	3.17071e+06	3.29468e+06	3.35526e+06	3.47639e+06	3.56091e+06	3.62632e+06	3.70908e+06	3.82741e+06	4.02655e+06	4.15623e+06	4.26005e+06	4.32378e+06	4.25809e+06	4.29395e+06	4.35007e+06	4.43668e+06	4.61809e+06	4.84165e+06
221	CENT	1	102.458	NA	1.44688e+06	1.32369e+06	1.32142e+06	1.25755e+06	1.31763e+06	1.35061e+06	1.34588e+06	1.31347e+06	1.4242e+06	1.42822e+06	1.49526e+06	1.52418e+06	1.58795e+06	1.59347e+06	1.73743e+06	1.79873e+06	1.80113e+06	1.93726e+06	2.07461e+06	2.19056e+06	2.30797e+06	2.38546e+06	2.50641e+06	2.67765e+06	2.86058e+06	2.89098e+06	3.04511e+06	3.21457e+06	3.2872e+06	3.41699e+06	3.5755e+06	3.71285e+06	3.78618e+06	3.79715e+06	3.85949e+06	3.98762e+06	4.08611e+06	4.2507e+06	4.35494e+06	4.35502e+06	4.45244e+06	4.50518e+06	4.49441e+06	4.71858e+06	5.0082e+06
222	CENT	2	104.592	NA	1.35095e+06	1.26428e+06	1.2676e+06	1.2704e+06	1.30224e+06	1.2405e+06	1.29613e+06	1.32432e+06	1.32269e+06	1.3859e+06	1.48658e+06	1.44557e+06	1.49396e+06	1.62748e+06	1.64601e+06	1.75543e+06	1.80938e+06	1.86289e+06	2.02973e+06	2.14535e+06	2.26281e+06	2.43599e+06	2.57323e+06	2.76967e+06	2.87024e+06	2.97364e+06	3.13319e+06	3.17535e+06	3.2642e+06	3.35688e+06	3.42735e+06	3.48017e+06	3.63823e+06	3.71593e+06	3.8889e+06	4.0223e+06	4.22334e+06	4.30771e+06	4.35828e+06	4.34481e+06	4.3776e+06	4.38542e+06	4.4619e+06	4.64653e+06	4.91418e+06
223	CENT	2	102.384	NA	1.43666e+06	1.44443e+06	1.37985e+06	1.42094e+06	1.38784e+06	1.40705e+06	1.37497e+06	1.42421e+06	1.44815e+06	1.50847e+06	1.53964e+06	1.59877e+06	1.6364e+06	1.74429e+06	1.84644e+06	1.91008e+06	1.96695e+06	2.00351e+06	2.18117e+06	2.32698e+06	2.43773e+06	2.57867e+06	2.70426e+06	2.79401e+06	2.8937e+06	2.97884e+06	3.10653e+06	3.33008e+06	3.53821e+06	3.55108e+06	3.68685e+06	3.90395e+06	3.96429e+06	4.00159e+06	4.02877e+06	4.15442e+06	4.35325e+06	4.42707e+06	4.53332e+06	4.53038e+06	4.63092e+06	4.67752e+06	4.72274e+06	4.93812e+06	5.1414e+06
224	CENT	2	101.099	NA	1.52097e+06	1.47483e+06	1.51636e+06	1.4798e+06	1.51242e+06	1.55143e+06	1.5613e+06	1.56875e+06	1.59037e+06	1.6599e+06	1.63562e+06	1.74336e+06	1.83315e+06	1.80986e+06	1.91451e+06	2.03662e+06	2.15032e+06	2.2244e+06	2.36772e+06	2.45977e+06	2.59051e+06	2.73033e+06	2.97488e+06	3.14843e+06	3.26651e+06	3.3162e+06	3.45773e+06	3.61851e+06	3.72929e+06	3.76811e+06	3.89164e+06	3.99886e+06	4.14664e+06	4.20033e+06	4.3134e+06	4.50453e+06	4.71604e+06	4.78566e+06	4.84361e+06	4.89416e+06	4.87986e+06	4.94752e+06	5.04242e+06	5.21055e+06	5.47243e+06
225	CENT	2	104.263	NA	1.28117e+06	1.26367e+06	1.29187e+06	1.2706e+06	1.20734e+06	1.21637e+06	1.28924e+06	1.30949e+06	1.30311e+06	1.33524e+06	1.40677e+06	1.40669e+06	1.4681e+06	1.48822e+06	1.54293e+06	1.64519e+06	1.69942e+06	1.80036e+06	1.87063e+06	1.9864e+06	2.11587e+06	2.29485e+06	2.42118e+06	2.57862e+06	2.71421e+06	2.73292e+06	2.80326e+06	2.92252e+06	3.00086e+06	3.07535e+06	3.13442e+06	3.2436e+06	3.37253e+06	3.44677e+06	3.49151e+06	3.68077e+06	3.85182e+06	3.97211e+06	3.98018e+06	3.98252e+06	3.9933e+06	3.96621e+06	4.1077e+06	4.22763e+06	4.49432e+06
226	HS	2	66.5699	NA	1.4057e+06	1.39704e+06	1.29586e+06	1.27279e+06	1.26921e+06	1.26793e+06	1.29655e+06	1.31879e+06	1.40239e+06	1.36913e+06	1.40793e+06	1.51063e+06	1.51994e+06	1.6249e+06	1.6272e+06	1.69642e+06	1.80206e+06	1.86286e+06	1.96251e+06	2.1086e+06	2.2428e+06	2.3779e+06	2.52617e+06	2.75298e+06	2.84073e+06	2910882	2.99563e+06	3.11908e+06	3.24185e+06	3.24556e+06	3.34656e+06	3.43314e+06	3.62625e+06	3.6676e+06	3.77503e+06	3.99161e+06	4.18864e+06	4.30677e+06	4.36099e+06	4.38027e+06	4.34262e+06	4.31939e+06	4.43065e+06	4.62285e+06	4.87942e+06
227	HS	2	65.9014	NA	1.35342e+06	1.26391e+06	1.24462e+06	1.20976e+06	1.18647e+06	1.17993e+06	1.27052e+06	1.24783e+06	1.29203e+06	1.33718e+06	1.36487e+06	1.384e+06	1.42725e+06	1.46937e+06	1.53866e+06	1.57367e+06	1.6869e+06	1.78235e+06	1.93084e+06	1.97582e+06	2.15354e+06	2.23275e+06	2.39798e+06	2.53362e+06	2.58471e+06	2.7167e+06	2.83192e+06	2.93689e+06	3.08291e+06	3.14183e+06	3.30854e+06	3.4954e+06	3.6287e+06	3.60605e+06	3.6055e+06	3.81631e+06	4.00395e+06	4.10378e+06	4.14539e+06	4.14108e+06	4.1817e+06	4.16332e+06	4.30719e+06	4.44033e+06	4.64592e+06
228	HS	2	82.5151	NA	1.42748e+06	1.38694e+06	1.35923e+06	1.34182e+06	1.33505e+06	1.33701e+06	1.38928e+06	1.37469e+06	1.48035e+06	1.48381e+06	1.58015e+06	1.59514e+06	1.60428e+06	1.70495e+06	1.7386e+06	1.84733e+06	1.94069e+06	1.98885e+06	2.11988e+06	2.18164e+06	2.35455e+06	2.46152e+06	2.71788e+06	2.87944e+06	3.01054e+06	3.07754e+06	3.11802e+06	3.16286e+06	3.33143e+06	3.36403e+06	3.4266e+06	3.56034e+06	3.70488e+06	3.79273e+06	3.91738e+06	4.11621e+06	4.29754e+06	4.41622e+06	4.43496e+06	4.42516e+06	4.47678e+06	4.49417e+06	4.58871e+06	4.77036e+06	4.97728e+06
229	HS	2	65.5945	NA	1.46519e+06	1.3976e+06	1.31548e+06	1.31037e+06	1.29867e+06	1.32017e+06	1.35862e+06	1.39713e+06	1.3623e+06	1.41224e+06	1.5628e+06	1.54662e+06	1.53819e+06	1.64512e+06	1.72488e+06	1.80801e+06	1.86664e+06	1.98038e+06	2.08528e+06	2.24749e+06	2.40177e+06	2.52005e+06	2.65839e+06	2.86707e+06	2.98354e+06	3.0042e+06	3.14128e+06	3.33635e+06	3.40582e+06	3.47914e+06	3.61135e+06	3.71314e+06	3.8587e+06	3.8918e+06	4.09105e+06	4.24279e+06	4.39841e+06	4.53986e+06	4.51981e+06	4.53696e+06	4.60225e+06	4.55567e+06	4.70082e+06	4.85265e+06	5.12711e+06
230	HS	2	74.4	NA	1.35199e+06	1.34774e+06	1.31856e+06	1.29448e+06	1.22621e+06	1.23367e+06	1.27714e+06	1.28458e+06	1.31362e+06	1.34187e+06	1.4117e+06	1.4284e+06	1.51437e+06	1.55015e+06	1.65365e+06	1.72497e+06	1.77222e+06	1.89261e+06	2.0215e+06	2.14535e+06	2.21363e+06	2.33837e+06	2.52616e+06	2.63949e+06	2.74955e+06	2.83796e+06	2.92131e+06	3.15405e+06	3.2484e+06	3.32317e+06	3.40062e+06	3.59327e+06	3.73035e+06	3.76088e+06	3.84868e+06	3.98624e+06	4.17239e+06	4.2573e+06	4.36738e+06	4.3329e+06	4.36307e+06	4.39546e+06	4.48537e+06	4.65243e+06	4.82671e+06
231	HS	2	75.3342	NA	1.47304e+06	1.3701e+06	1.35497e+06	1.36379e+06	1.34559e+06	1.37434e+06	1.35306e+06	1.42051e+06	1.45455e+06	1.47278e+06	1.5642e+06	1.55101e+06	1.63186e+06	1.66686e+06	1.71669e+06	1.81975e+06	1.92856e+06	2.00473e+06	2.13642e+06	2.2028e+06	2.43168e+06	2.55489e+06	2.77426e+06	2.90713e+06	3.1014e+06	3.11626e+06	3.23538e+06	3.40906e+06	3.50263e+06	3.52481e+06	3.64215e+06	3.81487e+06	3.90076e+06	4.02468e+06	4.07974e+06	4.31789e+06	4.47202e+06	4.59141e+06	4.62157e+06	4.61051e+06	4.6859e+06	4.6582e+06	4.75408e+06	5.00247e+06	5.2132e+06
232	HS	1	65.3342	NA	1.40722e+06	1.33877e+06	1.2713e+06	1.25611e+06	1.21045e+06	1.2585e+06	1.25063e+06	1.27043e+06	1.34731e+06	1.35655e+06	1.37925e+06	1.40195e+06	1.5058e+06	1.57196e+06	1.61442e+06	1.67012e+06	1.77038e+06	1.83968e+06	1.98845e+06	2.20298e+06	2.23085e+06	2.32725e+06	2.48762e+06	2.58231e+06	2.665e+06	2.77118e+06	2.98132e+06	3.07662e+06	3.24222e+06	3.26677e+06	3.40873e+06	3.61983e+06	3.69099e+06	3.73637e+06	3.80645e+06	3.90885e+06	4.11456e+06	4.20249e+06	4.26095e+06	4.29124e+06	4.2564e+06	4.33176e+06	4.44193e+06	4.59212e+06	4.76267e+06
233	HS	2	72.0384	NA	1.40408e+06	1.39021e+06	1.36589e+06	1.31274e+06	1.27299e+06	1.31791e+06	1.3519e+06	1.32303e+06	1.3775e+06	1.38513e+06	1.40264e+06	1.48259e+06	1.50489e+06	1.54137e+06	1.64014e+06	1.73791e+06	1.83944e+06	1.88023e+06	1.95987e+06	2.08326e+06	2.2665e+06	2.37319e+06	2.55351e+06	2.74673e+06	2.88838e+06	2.9271e+06	3.03038e+06	3.13127e+06	3.26526e+06	3.27934e+06	3.36304e+06	3.50317e+06	3.66249e+06	3.75578e+06	3.78991e+06	4.00283e+06	4.20896e+06	4.3035e+06	4.33908e+06	4.35667e+06	4.35365e+06	4.353e+06	4.43366e+06	4.64173e+06	4.88428e+06
234	HS	2	78.5973	NA	1.32717e+06	1.26385e+06	1.22132e+06	1.19624e+06	1.172e+06	1.17691e+06	1.20183e+06	1.26932e+06	1.25794e+06	1.26863e+06	1.38929e+06	1.37885e+06	1.42593e+06	1.44505e+06	1.47483e+06	1.60908e+06	1.71062e+06	1.7892e+06	1.88321e+06	1.9767e+06	2.10362e+06	2.26176e+06	2.44012e+06	2.54533e+06	2.67349e+06	2.74625e+06	2.80981e+06	2.91145e+06	2.96682e+06	3.07054e+06	3.17691e+06	3.2823e+06	3.38208e+06	3.37666e+06	3.52003e+06	3.68625e+06	3.90708e+06	4.02195e+06	4.06528e+06	4.0404e+06	4.05727e+06	3.98313e+06	4.12067e+06	4.29498e+06	4.48156e+06
235	HS	2	57.4493	NA	1.40977e+06	1.32655e+06	1.24319e+06	1.26735e+06	1.25551e+06	1.32777e+06	1.29955e+06	1.31387e+06	1.36166e+06	1.34825e+06	1.42827e+06	1.47687e+06	1.48673e+06	1.54145e+06	1.66448e+06	1.76271e+06	1.80167e+06	1.84499e+06	2.00572e+06	2.10425e+06	2.2104e+06	2.35229e+06	2.58905e+06	2.7935e+06	2.92455e+06	2.93323e+06	3.06632e+06	3.13932e+06	3.24941e+06	3.24613e+06	3.36427e+06	3.55364e+06	3.63615e+06	3.71052e+06	3.87592e+06	4.07343e+06	4.29415e+06	4.41921e+06	4.45282e+06	4.46038e+06	4.4214e+06	4.45272e+06	4.55118e+06	4.72086e+06	4.91772e+06
236	HS	1	80.1315	NA	1.38679e+06	1.30003e+06	1.24024e+06	1.2382e+06	1.2597e+06	1.25253e+06	1.28209e+06	1.27715e+06	1.30824e+06	1.3676e+06	1.35862e+06	1.41821e+06	1.48597e+06	1.47612e+06	1.54855e+06	1.68423e+06	1.80365e+06	1.86198e+06	1.92652e+06	2.10876e+06	2.21723e+06	2.36737e+06	2.61789e+06	2.80561e+06	2.91527e+06	2.95705e+06	3.06425e+06	3.18278e+06	3.22913e+06	3.34381e+06	3.38444e+06	3.47854e+06	3.71031e+06	3.76951e+06	3.86796e+06	4.03092e+06	4.25478e+06	4.39825e+06	4.4377e+06	4.3697e+06	4.40793e+06	4.42954e+06	4.51129e+06	4.70354e+06	4.92303e+06
237	HS	1	70.8767	NA	1.23127e+06	1.2468e+06	1.18785e+06	1.14769e+06	1.12659e+06	1.1798e+06	1.15989e+06	1.16962e+06	1.24232e+06	1.29477e+06	1.32975e+06	1.33739e+06	1.36467e+06	1.46248e+06	1.48895e+06	1.58468e+06	1.6406e+06	1.73499e+06	1.81277e+06	1.9944e+06	2.06584e+06	2.18537e+06	2.39028e+06	2.55496e+06	2.64706e+06	2.75991e+06	2.84227e+06	2.94425e+06	3.00762e+06	3.09547e+06	3.13968e+06	3.29631e+06	3.4333e+06	3.47179e+06	3.54814e+06	3.7692e+06	4.01762e+06	4.11173e+06	4.11024e+06	4.15944e+06	4.09827e+06	4.14017e+06	4.24474e+06	4.42166e+06	4.6225e+06
238	HS	2	69.4685	NA	1.29416e+06	1.27851e+06	1.23182e+06	1.19965e+06	1.23347e+06	1.20304e+06	1.21814e+06	1.2568e+06	1.27894e+06	1.32304e+06	1.34102e+06	1.38705e+06	1.44053e+06	1.46816e+06	1.50685e+06	1.60096e+06	1.69249e+06	1.81764e+06	1.89892e+06	2.0387e+06	2.15438e+06	2.22705e+06	2.39482e+06	2.51603e+06	2.59858e+06	2.67133e+06	2.84587e+06	2.98439e+06	3.165e+06	3.17162e+06	3.32204e+06	3.43769e+06	3.5181e+06	3.54663e+06	3.60321e+06	3.71529e+06	3.9101e+06	4.04019e+06	4.08042e+06	4.12614e+06	4.14656e+06	4.16659e+06	4.26708e+06	4.49131e+06	4.61135e+06
239	HS	1	67.7425	NA	1.41611e+06	1.3936e+06	1.30283e+06	1.27084e+06	1.2686e+06	1.27646e+06	1.31896e+06	1.3853e+06	1.39074e+06	1.44406e+06	1.44858e+06	1.50797e+06	1.53352e+06	1.63048e+06	1.71821e+06	1.77294e+06	1.87901e+06	1.93778e+06	2.03775e+06	2.21837e+06	2.29766e+06	2.44959e+06	2.61138e+06	2.75466e+06	2.85931e+06	2.95932e+06	3.0424e+06	3.20492e+06	3.29905e+06	3.388e+06	3.50259e+06	3.62823e+06	3.73155e+06	3.82463e+06	3.89253e+06	4.04218e+06	4.27636e+06	4.41884e+06	4.43182e+06	4.517e+06	4.47453e+06	4.51522e+06	4.57464e+06	4.79074e+06	4.99594e+06
240	HS	2	64.0164	NA	1.25044e+06	1.19716e+06	1.17124e+06	1.12291e+06	1.15626e+06	1.09976e+06	1.13705e+06	1.13266e+06	1.17572e+06	1.27436e+06	1.25382e+06	1.29e+06	1.32627e+06	1.4637e+06	1.5194e+06	1.58928e+06	1.65745e+06	1.71803e+06	1.8366e+06	1.95624e+06	2.05749e+06	2.1325e+06	2.28168e+06	2.35314e+06	2.47508e+06	2.63118e+06	2.71807e+06	2.83351e+06	2.92675e+06	3.04892e+06	3.15515e+06	3.2724e+06	3.34683e+06	3.38027e+06	3.5187e+06	3.60207e+06	3.76266e+06	3.89811e+06	3.92045e+06	3.93761e+06	3.9776e+06	3.98855e+06	4.04832e+06	4.21503e+06	4.43891e+06
241	HS	2	71.7425	NA	1.24645e+06	1.2167e+06	1.18922e+06	1.1889e+06	1.17226e+06	1.16835e+06	1.20124e+06	1.21255e+06	1.24616e+06	1.27852e+06	1.36028e+06	1.3354e+06	1.34405e+06	1.46625e+06	1.51841e+06	1.60342e+06	1.66228e+06	1.71112e+06	1.82287e+06	1.97316e+06	2.09363e+06	2.22329e+06	2.3994e+06	2.5326e+06	2.69028e+06	2.71272e+06	2.80393e+06	2.93895e+06	3.0307e+06	3.0674e+06	3.19661e+06	3.38062e+06	3.40864e+06	3.50106e+06	3.55553e+06	3.78843e+06	3.93851e+06	4.05189e+06	4.04662e+06	4.08884e+06	4.07896e+06	4.08715e+06	4.17183e+06	4.34947e+06	4.59965e+06
242	HS	1	69.6438	NA	1.3676e+06	1.34137e+06	1.24552e+06	1.28455e+06	1.27706e+06	1.31836e+06	1.31131e+06	1.35546e+06	1.37942e+06	1.36546e+06	1.42133e+06	1.49412e+06	1.5051e+06	1.60628e+06	1.66991e+06	1.69422e+06	1.80389e+06	1.9436e+06	2.06543e+06	2.19441e+06	2.34765e+06	2.42957e+06	2.57807e+06	2.72338e+06	2.82923e+06	2.92066e+06	3.01682e+06	3.17277e+06	3.27596e+06	3.36591e+06	3.48907e+06	3.62263e+06	3.71843e+06	3.78684e+06	3.87155e+06	4.06521e+06	4.21642e+06	4.4e+06	4.34765e+06	4.43278e+06	4.46122e+06	4.47165e+06	4.55728e+06	4.69433e+06	4.96729e+06
243	HS	1	72.7315	NA	1.2325e+06	1.11208e+06	1.13436e+06	1.12998e+06	1.09582e+06	1.05639e+06	1.14913e+06	1.16334e+06	1.17446e+06	1.19894e+06	1.24674e+06	1.25934e+06	1.32111e+06	1.38992e+06	1.44394e+06	1.51351e+06	1.62478e+06	1.6603e+06	1.81023e+06	1.87353e+06	2.00729e+06	2.08195e+06	2.16399e+06	2.28488e+06	2.36092e+06	2.46692e+06	2.61264e+06	2.75467e+06	2.90618e+06	2.9664e+06	3.01584e+06	3.23202e+06	3.32606e+06	3.30435e+06	3.31626e+06	3.46076e+06	3.65196e+06	3.72412e+06	3.7986e+06	3.82643e+06	3.83068e+06	3.89925e+06	3.96521e+06	4.10286e+06	4.26889e+06
244	HS	2	54.0959	NA	1.36846e+06	1.31992e+06	1.29401e+06	1.27345e+06	1.2309e+06	1.25895e+06	1.29255e+06	1.29044e+06	1.35056e+06	1.33476e+06	1.395e+06	1.43198e+06	1.48101e+06	1.56615e+06	1.6501e+06	1.68281e+06	1.82917e+06	1.87026e+06	1.95753e+06	2.08417e+06	2.21583e+06	2.40852e+06	2.52022e+06	2.72548e+06	2.82776e+06	2.89706e+06	3.00566e+06	3.10273e+06	3.17797e+06	3.26431e+06	3.30221e+06	3.471e+06	3.58098e+06	3.59853e+06	3.74641e+06	3.97732e+06	4.11913e+06	4.26915e+06	4.29815e+06	4.29872e+06	4.25088e+06	4.24806e+06	4.37073e+06	4.57173e+06	4.74429e+06
245	CENTOS	1	74	NA	1.41661e+06	1.29514e+06	1.25902e+06	1.26306e+06	1.25703e+06	1.28179e+06	1.27658e+06	1.28433e+06	1.33266e+06	1.38547e+06	1.40426e+06	1.43503e+06	1.47773e+06	1.61101e+06	1.63276e+06	1.7055e+06	1.79324e+06	1.88361e+06	2.03558e+06	2.11224e+06	2.26858e+06	2.40161e+06	2.49177e+06	2.65787e+06	2.76068e+06	2.85624e+06	2.93713e+06	3.11857e+06	3.23252e+06	3.34573e+06	3.44836e+06	3.63396e+06	3.75394e+06	3.77926e+06	3.84574e+06	4.06318e+06	4.19854e+06	4.32487e+06	4.36877e+06	4.43394e+06	4.38267e+06	4.44082e+06	4.50378e+06	4.71393e+06	4.83534e+06
246	CENT	2	105	NA	1.46694e+06	1.47208e+06	1.4198e+06	1.47812e+06	1.41486e+06	1.44537e+06	1.48387e+06	1.48454e+06	1.5772e+06	1.60837e+06	1.59271e+06	1.71054e+06	1.69494e+06	1.82488e+06	1.95866e+06	1.97458e+06	2.05655e+06	2.18577e+06	2.28693e+06	2.37992e+06	2.48022e+06	2.64444e+06	2.89437e+06	3.00526e+06	3.18382e+06	3.24403e+06	3.42319e+06	3.54646e+06	3.6714e+06	3.72506e+06	3.79282e+06	3.89265e+06	4.01634e+06	4.07919e+06	4.18644e+06	4.35478e+06	4.47392e+06	4.5853e+06	4.65932e+06	4.71541e+06	4.72657e+06	4.78113e+06	4.9161e+06	5.07086e+06	5.3145e+06
247	CENT	1	106	NA	1.31462e+06	1.27063e+06	1.21615e+06	1.20281e+06	1.21717e+06	1.18474e+06	1.28235e+06	1.26223e+06	1.35837e+06	1.35448e+06	1.43449e+06	1.40541e+06	1.53056e+06	1.55573e+06	1.5775e+06	1.67201e+06	1.72771e+06	1.77941e+06	1.94113e+06	2.04063e+06	2.16384e+06	2.24833e+06	2.36491e+06	2.50624e+06	2.62981e+06	2.68094e+06	2.81418e+06	2.94206e+06	3.04761e+06	3.10468e+06	3.20115e+06	3.35724e+06	3.44849e+06	3.47313e+06	3.54503e+06	3.71183e+06	3.89208e+06	4.01447e+06	4.06963e+06	4.05627e+06	4.05268e+06	4.10691e+06	4.14897e+06	4.31456e+06	4.51723e+06
248	CENT	1	105	NA	1.01727e+06	1.05744e+06	1.01263e+06	948543	968432	988294	1.02253e+06	995850	1.0797e+06	1.08529e+06	1.09729e+06	1.12631e+06	1.22834e+06	1.26692e+06	1.3408e+06	1.32528e+06	1.43997e+06	1.52495e+06	1.54448e+06	1.65636e+06	1.74642e+06	1.91157e+06	2.02176e+06	2.21416e+06	2.25906e+06	2.30983e+06	2.34876e+06	2.47677e+06	2.53384e+06	2.59057e+06	2.69176e+06	2.73454e+06	2.84289e+06	2.89402e+06	3.06055e+06	3.19205e+06	3.33108e+06	3.39322e+06	3.37638e+06	3.41937e+06	3.41412e+06	3.38999e+06	3.52876e+06	3.6212e+06	3.7738e+06
249	CENT	1	106	NA	1.29983e+06	1.2768e+06	1.23974e+06	1.2181e+06	1.28256e+06	1.2439e+06	1.27835e+06	1.34503e+06	1.35617e+06	1.36591e+06	1.43951e+06	1.47835e+06	1.5422e+06	1.63527e+06	1.6833e+06	1.74395e+06	1.85823e+06	1.90982e+06	2.01269e+06	2.16094e+06	2.31124e+06	2.42945e+06	2.6192e+06	2.74358e+06	2.88524e+06	2.97499e+06	3.07573e+06	3.19527e+06	3.30954e+06	3.36947e+06	3.44187e+06	3.54783e+06	3.64419e+06	3.75031e+06	3.91969e+06	4.07834e+06	4.24154e+06	4.34183e+06	4.40249e+06	4.33018e+06	4.40005e+06	4.44981e+06	4.52831e+06	4.69639e+06	4.88823e+06
250	CENT	1	105	NA	1.42839e+06	1.40963e+06	1.3953e+06	1.41515e+06	1.40541e+06	1.42548e+06	1.39987e+06	1.46622e+06	1.53805e+06	1.59797e+06	1.60606e+06	1.65502e+06	1.67591e+06	1.74498e+06	1.8343e+06	1.94914e+06	1.96124e+06	2.08898e+06	2.22193e+06	2.36874e+06	2.52867e+06	2.66959e+06	2.81672e+06	3.0141e+06	3.14115e+06	3.22337e+06	3.29348e+06	3.41467e+06	3.55009e+06	3.59127e+06	3.73159e+06	3.84868e+06	3.98394e+06	4.08463e+06	4.19589e+06	4.45646e+06	4.59463e+06	4.69507e+06	4.68131e+06	4.64652e+06	4.6094e+06	4.71193e+06	4.84833e+06	4.99899e+06	5.2592e+06
251	CENT	1	105	NA	1.24262e+06	1.28089e+06	1.14922e+06	1.20653e+06	1.20597e+06	1.29567e+06	1.24755e+06	1.31105e+06	1.36049e+06	1.35326e+06	1.41235e+06	1.43341e+06	1.46463e+06	1.51443e+06	1.60227e+06	1.67303e+06	1.68875e+06	1.8065e+06	1.87784e+06	2.02257e+06	2.17114e+06	2.3069e+06	2.41589e+06	2.57054e+06	2.67109e+06	2.78077e+06	2.91927e+06	2.99664e+06	3.16255e+06	3.20738e+06	3.30436e+06	3.3705e+06	3.55901e+06	3.59238e+06	3.68967e+06	3.87442e+06	4.07939e+06	4.15663e+06	4.20204e+06	4.19132e+06	4.19608e+06	4.25141e+06	4.29287e+06	4.43908e+06	4.67096e+06
252	CENT	2	105	NA	1.20984e+06	1.20462e+06	1.20633e+06	1.16883e+06	1.16269e+06	1.29441e+06	1.23295e+06	1.25858e+06	1.2762e+06	1.37229e+06	1.3836e+06	1.42396e+06	1.50137e+06	1.45983e+06	1.64882e+06	1.73774e+06	1.76716e+06	1.85331e+06	1.90076e+06	2.02609e+06	2.14071e+06	2.26566e+06	2.43249e+06	2.56764e+06	2.67769e+06	2.74451e+06	2.84511e+06	2.92615e+06	3.0261e+06	3.09616e+06	3.21544e+06	3.31839e+06	3.40856e+06	3.508e+06	3.55108e+06	3.69951e+06	3.819e+06	3.92896e+06	4.02741e+06	4.02783e+06	4.09e+06	4.12865e+06	4.25573e+06	4.36306e+06	4.58975e+06
253	CENT	2	105	NA	1.24766e+06	1.25288e+06	1.29533e+06	1.26496e+06	1.27913e+06	1.29246e+06	1.29184e+06	1.38892e+06	1.39556e+06	1.44539e+06	1.51705e+06	1.5117e+06	1.56887e+06	1.59941e+06	1.67371e+06	1.81418e+06	1.87596e+06	1.98765e+06	2.00754e+06	2.12444e+06	2.25594e+06	2.34278e+06	2.44289e+06	2.62352e+06	2.74188e+06	2.80354e+06	2.93065e+06	3.02251e+06	3.18277e+06	3.2625e+06	3.36215e+06	3.43873e+06	3.5203e+06	3.5653e+06	3.6561e+06	3.81437e+06	3.92081e+06	4.02035e+06	4.00425e+06	4.03841e+06	4.04292e+06	4.11547e+06	4.21632e+06	4.36294e+06	4.53485e+06
254	CENT	2	106	NA	1.26049e+06	1.21586e+06	1.18506e+06	1.19367e+06	1.22658e+06	1.19595e+06	1.20869e+06	1.19581e+06	1.21932e+06	1.2821e+06	1.31895e+06	1.3667e+06	1.47015e+06	1.43694e+06	1.53909e+06	1.62817e+06	1.68525e+06	1.75761e+06	1.90309e+06	1.9975e+06	2.14553e+06	2.30727e+06	2.44352e+06	2.63752e+06	2.70407e+06	2.80164e+06	2.89994e+06	3.01471e+06	3.09676e+06	3.25554e+06	3.25801e+06	3.41888e+06	3.47657e+06	3.56703e+06	3.66706e+06	3.87698e+06	4.01704e+06	4.17019e+06	4.16101e+06	4.13436e+06	4.16276e+06	4.19936e+06	4.31132e+06	4.48695e+06	4.65296e+06
255	CENT	2	105	NA	1.31256e+06	1.25797e+06	1.19068e+06	1.18778e+06	1.21245e+06	1.24807e+06	1.24297e+06	1.34692e+06	1.3065e+06	1.31241e+06	1.38671e+06	1.40468e+06	1.45909e+06	1.53372e+06	1.55962e+06	1.66198e+06	1.73683e+06	1.82693e+06	1.88543e+06	1.97186e+06	2.07417e+06	2.23352e+06	2.40186e+06	2.59115e+06	2.68729e+06	2.72727e+06	2.82994e+06	2.97974e+06	3.00405e+06	3.03143e+06	3.12432e+06	3.28726e+06	3.36178e+06	3.41207e+06	3.49189e+06	3.65047e+06	3.86885e+06	3.96686e+06	3.98839e+06	3.95511e+06	3.97318e+06	3.98509e+06	4.08219e+06	4.23077e+06	4.42904e+06
256	CENT	2	104	NA	1.29369e+06	1.33752e+06	1.19078e+06	1.22266e+06	1.23428e+06	1.21912e+06	1.26279e+06	1.31604e+06	1.33475e+06	1.3258e+06	1.37617e+06	1.44231e+06	1.43807e+06	1.5446e+06	1.64303e+06	1.64391e+06	1.7512e+06	1.8375e+06	1.94346e+06	2.06549e+06	2.20415e+06	2.28954e+06	2.38487e+06	2.58356e+06	2.66313e+06	2.76648e+06	2.84645e+06	2.99759e+06	3.11656e+06	3.17621e+06	3.2958e+06	3.40533e+06	3.48101e+06	3.59352e+06	3.63352e+06	3.76266e+06	3.93479e+06	4.05402e+06	4.06484e+06	4.04854e+06	4.07935e+06	4.10878e+06	4.25013e+06	4.4483e+06	4.56625e+06
257	CENT	2	104	NA	1.35133e+06	1.25839e+06	1.19087e+06	1.17719e+06	1.20343e+06	1.22647e+06	1.24987e+06	1.33501e+06	1.3028e+06	1.33705e+06	1.37605e+06	1.41918e+06	1.45293e+06	1.4437e+06	1.50271e+06	1.64369e+06	1.67522e+06	1.77488e+06	1.8874e+06	2.03533e+06	2.11413e+06	2.267e+06	2.43083e+06	2.56903e+06	2.67588e+06	2.72744e+06	2.80986e+06	2.91859e+06	3.10623e+06	3.13586e+06	3.2839e+06	3.28978e+06	3.45583e+06	3.51953e+06	3.63755e+06	3.75629e+06	3.93924e+06	4.05257e+06	4.11324e+06	4.07205e+06	4.04165e+06	4.07529e+06	4.22405e+06	4.34027e+06	4.54244e+06
258	CENT	2	101	NA	1.26906e+06	1.27954e+06	1.23549e+06	1.22602e+06	1.28002e+06	1.20911e+06	1.27096e+06	1.27954e+06	1.32332e+06	1.35999e+06	1.36961e+06	1.42522e+06	1.51244e+06	1.55766e+06	1.63541e+06	1.72297e+06	1.74972e+06	1.90654e+06	1.95798e+06	2.08772e+06	2.16069e+06	2.27052e+06	2.4931e+06	2.66872e+06	2.72774e+06	2.85325e+06	2.97653e+06	3.07688e+06	3.11987e+06	3.22641e+06	3.28529e+06	3.40791e+06	3.44694e+06	3.55262e+06	3.6719e+06	3.8787e+06	4.04386e+06	4.20293e+06	4.20824e+06	4.17364e+06	4.20975e+06	4.2227e+06	4.35242e+06	4.51045e+06	4.71765e+06
259	CENT	2	100	NA	1.40197e+06	1.33696e+06	1.26496e+06	1.28425e+06	1.27561e+06	1.25399e+06	1.32943e+06	1.29991e+06	1.39035e+06	1.43321e+06	1.52454e+06	1.48828e+06	1.53482e+06	1.61138e+06	1.73174e+06	1.76618e+06	1.90653e+06	1.93175e+06	2.05313e+06	2.21479e+06	2.33322e+06	2.45788e+06	2.65866e+06	2.86157e+06	2.97167e+06	3.03194e+06	3.11788e+06	3.19488e+06	3.29545e+06	3.38585e+06	3.42921e+06	3.60892e+06	3.69292e+06	3.77909e+06	3.95471e+06	4.16887e+06	4.43593e+06	4.49863e+06	4.47542e+06	4.43749e+06	4.4514e+06	4.49308e+06	4.58395e+06	4.82126e+06	5.05556e+06
260	CENT	1	100	NA	1.17202e+06	1.15661e+06	1.10286e+06	1.17506e+06	1.07306e+06	1.06508e+06	1.15551e+06	1.15924e+06	1.21885e+06	1.20025e+06	1.25738e+06	1.3161e+06	1.33344e+06	1.37765e+06	1.53269e+06	1.56988e+06	1.61118e+06	1.66342e+06	1.83158e+06	1.93645e+06	2.0398e+06	2.19887e+06	2.34981e+06	2.53798e+06	2.64198e+06	2.75048e+06	2.75482e+06	2.87142e+06	2.97114e+06	2.99275e+06	3.09314e+06	3.26377e+06	3.38227e+06	3.38428e+06	3.57111e+06	3.78129e+06	3.96557e+06	4.0827e+06	4.03772e+06	4.0274e+06	4.04714e+06	4.00096e+06	4.1448e+06	4.23519e+06	4.53233e+06
261	CENT	1	100	NA	1.29369e+06	1.27543e+06	1.30986e+06	1.25046e+06	1.27148e+06	1.2818e+06	1.35222e+06	1.36058e+06	1.36101e+06	1.4295e+06	1.41271e+06	1.47252e+06	1.48722e+06	1.58684e+06	1.62651e+06	1.70955e+06	1.79063e+06	1.90814e+06	1.93501e+06	2.06185e+06	2.17106e+06	2.29006e+06	2.47187e+06	2.62337e+06	2.72174e+06	2.846e+06	2.88866e+06	3.00898e+06	3.05971e+06	3.1632e+06	3.22065e+06	3.24674e+06	3.37468e+06	3.43268e+06	3.51909e+06	3.73138e+06	3.8642e+06	3.94614e+06	4.01575e+06	3.99176e+06	4.06769e+06	4.12715e+06	4.1571e+06	4.37319e+06	4.48581e+06
262	CENT	1	101	NA	1.46604e+06	1.40849e+06	1.3578e+06	1.36607e+06	1.34004e+06	1.33875e+06	1.37788e+06	1.4367e+06	1.44368e+06	1.50337e+06	1.5265e+06	1.57412e+06	1.62499e+06	1.70651e+06	1.74155e+06	1.82538e+06	1.88593e+06	2.02716e+06	2.12157e+06	2.27524e+06	2.40066e+06	2.50368e+06	2.72041e+06	2.85237e+06	3.0107e+06	3.05288e+06	3.18361e+06	3.31508e+06	3.46944e+06	3.50934e+06	3.62484e+06	3.68527e+06	3.87475e+06	3.89024e+06	4.03406e+06	4.2462e+06	4.47235e+06	4.57099e+06	4.588e+06	4.62981e+06	4.57084e+06	4.63663e+06	4.75882e+06	4.98154e+06	5.17397e+06
263	CENT	1	103	NA	1.13885e+06	1.10818e+06	1.06937e+06	1.03725e+06	1.0608e+06	1.09948e+06	1.06512e+06	1.09806e+06	1.17705e+06	1.17523e+06	1.25624e+06	1.26884e+06	1.38509e+06	1.40313e+06	1.48057e+06	1.53977e+06	1.54415e+06	1.6631e+06	1.72337e+06	1.81816e+06	1.9731e+06	2.05936e+06	2.20361e+06	2.39733e+06	2.47727e+06	2.53672e+06	2.62227e+06	2.66542e+06	2.82209e+06	2.86892e+06	2.9456e+06	2.9936e+06	3.10752e+06	3.1225e+06	3.24677e+06	3.38313e+06	3.52415e+06	3.61512e+06	3.61478e+06	3.66592e+06	3.64139e+06	3.70509e+06	3.81723e+06	3.9075e+06	4.08687e+06
264	CENT	2	101	NA	1.41121e+06	1.41239e+06	1.36631e+06	1.37288e+06	1.33947e+06	1.38665e+06	1.39178e+06	1.47699e+06	1.51647e+06	1.45474e+06	1.60489e+06	1.6107e+06	1.63839e+06	1.67471e+06	1.78552e+06	1.87184e+06	1.93919e+06	2.05214e+06	2.1472e+06	2.28373e+06	2.35402e+06	2.51285e+06	2.6541e+06	2.75175e+06	2.91413e+06	2.97197e+06	3.10995e+06	3.25354e+06	3.38959e+06	3.42152e+06	3.59524e+06	3.64433e+06	3.74628e+06	3.84931e+06	3.84037e+06	4.04162e+06	4.22771e+06	4.2481e+06	4.32775e+06	4.30112e+06	4.36232e+06	4.39134e+06	4.52169e+06	4.65264e+06	4.88832e+06
265	CENT	2	102	NA	1.38598e+06	1.37614e+06	1.3641e+06	1.30813e+06	1.35373e+06	1.32492e+06	1.33904e+06	1.37409e+06	1.42166e+06	1.50779e+06	1.52799e+06	1.55478e+06	1.64774e+06	1.69472e+06	1.81104e+06	1.88071e+06	1.93896e+06	2.01086e+06	2.13569e+06	2.28742e+06	2.41973e+06	2.56072e+06	2.67687e+06	2.76958e+06	2.83663e+06	2.95464e+06	3.10719e+06	3.26025e+06	3.36003e+06	3.53431e+06	3.6362e+06	3.82382e+06	3.92806e+06	3.92127e+06	3.97869e+06	4.14858e+06	4.34318e+06	4.45077e+06	4.48823e+06	4.53115e+06	4.53765e+06	4.59654e+06	4.73218e+06	4.87291e+06	5.14577e+06
266	CENT	1	100	NA	1.33121e+06	1.31368e+06	1.26166e+06	1.23112e+06	1.2157e+06	1.27522e+06	1.30675e+06	1.31078e+06	1.31432e+06	1.39724e+06	1.42793e+06	1.44942e+06	1.51189e+06	1.58855e+06	1.64505e+06	1.69674e+06	1.73198e+06	1.76822e+06	1.93375e+06	2.03417e+06	2.1034e+06	2.2793e+06	2.39576e+06	2.60085e+06	2.74856e+06	2.77415e+06	2.84342e+06	2.9907e+06	3.06591e+06	3.13928e+06	3.22853e+06	3.3185e+06	3.41531e+06	3.47049e+06	3.53933e+06	3.64839e+06	3.86434e+06	3.93742e+06	4.00424e+06	3.99413e+06	4.0162e+06	4.07366e+06	4.11668e+06	4.31128e+06	4.536e+06
267	CENT	2	100	NA	1.09559e+06	1.08492e+06	973631	1.00335e+06	1.0258e+06	992597	1.10201e+06	1.04662e+06	1.06744e+06	1.14658e+06	1.14228e+06	1.173e+06	1.26314e+06	1.28737e+06	1.35372e+06	1.39236e+06	1.4526e+06	1.5303e+06	1.67295e+06	1.72762e+06	1.85095e+06	1.9367e+06	2.11019e+06	2.19673e+06	2.31885e+06	2.4104e+06	2.53661e+06	2.60977e+06	2.67623e+06	2.77691e+06	2.84057e+06	2.98844e+06	3.00731e+06	3.06963e+06	3.15975e+06	3.32546e+06	3.50661e+06	3.57898e+06	3.59687e+06	3.52667e+06	3.56438e+06	3.52781e+06	3.67486e+06	3.74724e+06	3.97173e+06
268	CENT	1	100	NA	1.53404e+06	1.44756e+06	1.44101e+06	1.47295e+06	1.52503e+06	1.52502e+06	1.61447e+06	1.58851e+06	1.657e+06	1.68072e+06	1.73426e+06	1.83181e+06	1.8484e+06	1.96008e+06	1.99463e+06	2.08801e+06	2.20137e+06	2.31731e+06	2.40112e+06	2.55712e+06	2.61546e+06	2.74802e+06	2.95741e+06	3.13113e+06	3.25716e+06	3.35103e+06	3.48259e+06	3.54379e+06	3.70447e+06	3.72577e+06	3.79598e+06	3.94633e+06	4.0493e+06	4.16637e+06	4.27355e+06	4.4262e+06	4.58974e+06	4.7015e+06	4.71506e+06	4.74811e+06	4.77063e+06	4.83249e+06	4.97422e+06	5.1811e+06	5.28445e+06
269	CENT	1	100	NA	1.24132e+06	1.20408e+06	1.17885e+06	1.1348e+06	1.15815e+06	1.15685e+06	1.1912e+06	1.22236e+06	1.22277e+06	1.25816e+06	1.30223e+06	1.36073e+06	1.42456e+06	1.44053e+06	1.53175e+06	1.57526e+06	1.67994e+06	1.77494e+06	1.90224e+06	2.01897e+06	2.1651e+06	2.25264e+06	2.36687e+06	2.50363e+06	2.62761e+06	2.73306e+06	2.75894e+06	2.89595e+06	3.00964e+06	3.09575e+06	3.16492e+06	3.29283e+06	3.34515e+06	3.36716e+06	3.52685e+06	3.68913e+06	3.88479e+06	3.89957e+06	3.95622e+06	3.93922e+06	3.99944e+06	3.99786e+06	4.04624e+06	4.24658e+06	4.42345e+06
270	CENT	2	104	NA	1.11526e+06	1.07421e+06	1.03329e+06	1.03795e+06	1.06376e+06	1.10302e+06	1.0688e+06	1.09617e+06	1.12663e+06	1.15393e+06	1.19484e+06	1.23395e+06	1.25112e+06	1.32588e+06	1.40513e+06	1.47074e+06	1.53896e+06	1.57327e+06	1.73045e+06	1.80778e+06	1.92825e+06	1.93471e+06	2.09038e+06	2.23283e+06	2.3232e+06	2.38509e+06	2.49491e+06	2.64469e+06	2.77798e+06	2.81108e+06	2.89043e+06	2.98116e+06	3.13842e+06	3.16652e+06	3212274	3.32577e+06	3.50612e+06	3.59574e+06	3.64846e+06	3.7068e+06	3.65427e+06	3.72482e+06	3.76354e+06	3.92461e+06	4.09225e+06
271	CENT	2	104	NA	1.27938e+06	1.209e+06	1.22029e+06	1.20725e+06	1.21543e+06	1.26821e+06	1.28284e+06	1.27566e+06	1.28571e+06	1.41854e+06	1.38433e+06	1.4542e+06	1.4687e+06	1.5109e+06	1.63429e+06	1.71873e+06	1.76445e+06	1.84706e+06	1.92332e+06	2.09348e+06	2.18659e+06	2.27512e+06	2.38697e+06	2.52885e+06	2.63443e+06	2.75601e+06	2.84686e+06	2.99599e+06	3.14443e+06	3.2e+06	3.31238e+06	3.36344e+06	3.51455e+06	3.58912e+06	3.58217e+06	3.77093e+06	3.88716e+06	3.99271e+06	3.99941e+06	4.03871e+06	4.03842e+06	4.03974e+06	4.19394e+06	4.29909e+06	4.49413e+06
272	CENT	2	104	NA	1.2652e+06	1.22389e+06	1.2045e+06	1.19965e+06	1.20235e+06	1.18618e+06	1.218e+06	1.2268e+06	1.32843e+06	1.30672e+06	1.38e+06	1.38904e+06	1.44304e+06	1.48969e+06	1.57977e+06	1.65763e+06	1.70827e+06	1.71971e+06	1.80649e+06	1.97377e+06	2.13569e+06	2.21495e+06	2.34352e+06	2.46129e+06	2.61493e+06	2.69381e+06	2.77792e+06	2.86707e+06	2.93839e+06	3.05884e+06	3.12311e+06	3.15991e+06	3.27052e+06	3.35564e+06	3.48109e+06	3.6285e+06	3.77296e+06	3.90233e+06	3.91246e+06	3.88699e+06	3.87275e+06	3.90906e+06	4.04378e+06	4.22373e+06	4.52493e+06
273	CENT	2	102	NA	1.43528e+06	1.38938e+06	1.32801e+06	1.29667e+06	1.3437e+06	1.32389e+06	1.34798e+06	1.38854e+06	1.36015e+06	1.43274e+06	1.48819e+06	1.50316e+06	1.51777e+06	1.6205e+06	1.68541e+06	1.74275e+06	1.77764e+06	1.90909e+06	1.99971e+06	2.10051e+06	2.20891e+06	2.37626e+06	2.52008e+06	2.71779e+06	2.84785e+06	2.87569e+06	2.96042e+06	3.10747e+06	3.28159e+06	3.27925e+06	3.34684e+06	3.48791e+06	3.56302e+06	3.65061e+06	3.76397e+06	3.9758e+06	4.16915e+06	4.28237e+06	4.31478e+06	4.28305e+06	4.36145e+06	4.31813e+06	4.42033e+06	4.61595e+06	4.86909e+06
274	CENT	2	103	NA	1.06016e+06	1.11284e+06	1.02938e+06	1.08079e+06	1.01738e+06	1.08992e+06	1.12303e+06	1.09234e+06	1.09638e+06	1.10648e+06	1.12483e+06	1.20613e+06	1.1983e+06	1.30745e+06	1.37414e+06	1.45651e+06	1.51278e+06	1.54524e+06	1.65566e+06	1.7412e+06	1.78728e+06	1.87526e+06	1.99176e+06	2.16027e+06	2.22641e+06	2.26773e+06	2.35411e+06	2.48519e+06	2.6336e+06	2.6551e+06	2.73512e+06	2.85868e+06	2.91672e+06	2.93724e+06	3.02876e+06	3.12789e+06	3.17812e+06	3.27993e+06	3.32578e+06	3.35538e+06	3.3766e+06	3.39074e+06	3.52047e+06	3.67097e+06	3.776e+06
275	CENT	2	102	NA	1.25049e+06	1.18121e+06	1.23056e+06	1.24271e+06	1.20454e+06	1.26382e+06	1.31347e+06	1.30819e+06	1.37156e+06	1.40892e+06	1.43384e+06	1.48676e+06	1.48516e+06	1.58124e+06	1.69412e+06	1.75865e+06	1.80494e+06	1.92359e+06	1.96628e+06	2.02824e+06	2.13983e+06	2.21614e+06	2.3578e+06	2.5285e+06	2.65743e+06	2.7765e+06	2.88106e+06	2.98439e+06	3.05947e+06	3.09888e+06	3.21618e+06	3.27386e+06	3.26929e+06	3.39507e+06	3.45267e+06	3.63152e+06	3.73313e+06	3.86595e+06	3.91686e+06	3.91575e+06	3.9691e+06	3.9663e+06	4.09842e+06	4.20904e+06	4.40858e+06
276	CENT	1	100	NA	1.35839e+06	1.31179e+06	1.28486e+06	1.29596e+06	1.22158e+06	1.29671e+06	1.34452e+06	1.34029e+06	1.32924e+06	1.367e+06	1.43268e+06	1.43808e+06	1.53161e+06	1.54586e+06	1.62228e+06	1.7056e+06	1.76781e+06	1.88704e+06	1.97484e+06	2.10531e+06	2.24555e+06	2.36611e+06	2.59293e+06	2.71101e+06	2.77446e+06	2.89377e+06	3.02949e+06	3.19337e+06	3.32343e+06	3.38498e+06	3.41552e+06	3.54744e+06	3.66156e+06	3.68048e+06	3.82427e+06	4.01469e+06	4.23708e+06	4.30338e+06	4.34422e+06	4.35612e+06	4.37919e+06	4.36012e+06	4.50397e+06	4.56228e+06	4.84984e+06
277	HS	1	58	NA	1.22102e+06	1.14038e+06	1.19747e+06	1.13897e+06	1.17022e+06	1.16699e+06	1.16575e+06	1.17356e+06	1.24395e+06	1.29512e+06	1.28855e+06	1.30072e+06	1.37205e+06	1.38602e+06	1.54211e+06	1.57211e+06	1.63622e+06	1.75359e+06	1.91267e+06	2.03857e+06	2.06525e+06	2.17009e+06	2.33994e+06	2.40892e+06	2.49008e+06	2.60557e+06	2.69286e+06	2.92188e+06	3.04654e+06	3.1375e+06	3.2831e+06	3.40366e+06	3.5178e+06	3.49541e+06	3.5407e+06	3.66574e+06	3.82565e+06	3.94195e+06	3.98733e+06	4.04067e+06	4.09396e+06	4.11817e+06	4.20778e+06	4.36144e+06	4.5448e+06
278	HS	1	62	NA	1.24821e+06	1.18414e+06	1.18076e+06	1.11761e+06	1.11517e+06	1.14016e+06	1.16485e+06	1.18839e+06	1.20647e+06	1.26953e+06	1.25875e+06	1.32314e+06	1.36068e+06	1.437e+06	1.48588e+06	1.53153e+06	1.60174e+06	1.66242e+06	1807849	1.91206e+06	2.01644e+06	2.15915e+06	2.27332e+06	2.42803e+06	2.49797e+06	2.57713e+06	2.62757e+06	2.86649e+06	2.95594e+06	3.04843e+06	3.1586e+06	3.26169e+06	3.36931e+06	3.41922e+06	3.4817e+06	3.56173e+06	3.72993e+06	3.88199e+06	3.89607e+06	3.97052e+06	3.97505e+06	4.00844e+06	4.1055e+06	4.18411e+06	4.40007e+06
279	HS	1	77	NA	1.4014e+06	1.35133e+06	1.25667e+06	1.24842e+06	1.27224e+06	1.24596e+06	1.25329e+06	1.26738e+06	1.29582e+06	1.38444e+06	1.39003e+06	1.43074e+06	1.51068e+06	1.53648e+06	1.60186e+06	1.67981e+06	1.77344e+06	1.84977e+06	1.98232e+06	2.12059e+06	2.2705e+06	2.42676e+06	2.49635e+06	2.62863e+06	2.73714e+06	2.81625e+06	2.92491e+06	3.1791e+06	3.28814e+06	3.35566e+06	3.4346e+06	3.62145e+06	3.82843e+06	3.80614e+06	3.90427e+06	4.0558e+06	4.24792e+06	4.34878e+06	4.39344e+06	4.37948e+06	4.34978e+06	4.40852e+06	4.49239e+06	4.68061e+06	4.90137e+06
280	HS	1	61	NA	1.27408e+06	1.20273e+06	1.18521e+06	1.18271e+06	1.13584e+06	1.12071e+06	1.20645e+06	1.1989e+06	1.22934e+06	1.26248e+06	1.35537e+06	1.28938e+06	1.36962e+06	1.41009e+06	1.50601e+06	1.5334e+06	1.649e+06	1.73223e+06	1.78549e+06	1.9701e+06	2.05302e+06	2.15483e+06	2.30564e+06	2.41567e+06	2.47369e+06	2.60831e+06	2.69587e+06	2.83708e+06	2.94453e+06	3.05882e+06	3.07941e+06	3.27143e+06	3.37194e+06	3.38186e+06	3.47713e+06	3.63371e+06	3.79488e+06	3.88978e+06	3.981e+06	3.98455e+06	3.97246e+06	3.97967e+06	4.10287e+06	4.23842e+06	4.43534e+06
281	HS	1	71	NA	1.47138e+06	1.43108e+06	1.35299e+06	1.36189e+06	1.34055e+06	1.36502e+06	1.34084e+06	1.38481e+06	1.42577e+06	1.47708e+06	1.48781e+06	1.57427e+06	1.59096e+06	1.67897e+06	1.72139e+06	1.83875e+06	1.90134e+06	2.01589e+06	2.12562e+06	2.30881e+06	2.4882e+06	2.56231e+06	2.74168e+06	2.99978e+06	3.11648e+06	3.16804e+06	3.26359e+06	3.342e+06	3.4124e+06	3.46591e+06	3.56974e+06	3.74909e+06	3.89457e+06	4.00431e+06	4.17861e+06	4.41741e+06	4.65006e+06	4.71713e+06	4.7182e+06	4.65564e+06	4.64061e+06	4.64326e+06	4.7007e+06	4.9257e+06	5.22897e+06
282	HS	1	72	NA	1.32013e+06	1.21628e+06	1.16756e+06	1.19778e+06	1.10516e+06	1.14591e+06	1.15923e+06	1.20483e+06	1.25569e+06	1.25491e+06	1.30853e+06	1.36484e+06	1.384e+06	1.46351e+06	1.5161e+06	1.60222e+06	1.6476e+06	1.74664e+06	1.87557e+06	1.97437e+06	2.16317e+06	2.29945e+06	2.39123e+06	2.59017e+06	2.6181e+06	2.7278e+06	2.77496e+06	2.93763e+06	3.03766e+06	3.13819e+06	3.22166e+06	3.36158e+06	3.47241e+06	3.51777e+06	3.61533e+06	3.85484e+06	4.07182e+06	4.12301e+06	4.15316e+06	4.07284e+06	4.05992e+06	4.05648e+06	4.17679e+06	4.42549e+06	4.54929e+06
283	HS	1	73	NA	1.35948e+06	1.37108e+06	1.26885e+06	1.2969e+06	1.25304e+06	1.29144e+06	1.28291e+06	1.34892e+06	1.34393e+06	1.40784e+06	1.42676e+06	1.49051e+06	1.58174e+06	1.62753e+06	1.66836e+06	1.78956e+06	1.83397e+06	1.89667e+06	2.03969e+06	2.17308e+06	2.32287e+06	2.42613e+06	2.66598e+06	2.71219e+06	2.80911e+06	2.92733e+06	2.98203e+06	3.17235e+06	3.24739e+06	3.37332e+06	3.46779e+06	3.58967e+06	3.71774e+06	3.80017e+06	3.88038e+06	4.14214e+06	4.27734e+06	4.3586e+06	4.42532e+06	4.40627e+06	4.37159e+06	4.45276e+06	4.54246e+06	4.7466e+06	4.94189e+06
284	HS	2	82	NA	1.27499e+06	1.20063e+06	1.12155e+06	1.11601e+06	1.16719e+06	1.11685e+06	1.14144e+06	1.16725e+06	1.2226e+06	1.23508e+06	1.27668e+06	1.33201e+06	1.37886e+06	1.41635e+06	1.46615e+06	1.49942e+06	1.60071e+06	1.68693e+06	1.79973e+06	1.92435e+06	2.04502e+06	2.133e+06	2.31288e+06	2.48822e+06	2.6648e+06	2.69905e+06	2.7148e+06	2.90728e+06	2.87781e+06	2.95151e+06	3.04223e+06	3.16985e+06	3.28818e+06	3.34571e+06	3.48187e+06	3.67292e+06	3.90284e+06	3.93444e+06	3.97962e+06	3.98077e+06	3.95027e+06	3.98321e+06	4.04441e+06	4.19122e+06	4.44992e+06
285	HS	1	85	NA	1.35169e+06	1.35612e+06	1.29957e+06	1.2965e+06	1.29634e+06	1.25981e+06	1.33434e+06	1.34794e+06	1.40745e+06	1.43154e+06	1.441e+06	1.48736e+06	1.53963e+06	1.6113e+06	1.68822e+06	1.76598e+06	1.83415e+06	1.94693e+06	2.07689e+06	2.23761e+06	2.33808e+06	2.47995e+06	2.6216e+06	2.7357e+06	2.82379e+06	2.91198e+06	3.05111e+06	3.24318e+06	3.37727e+06	3.51953e+06	3.53594e+06	3.73109e+06	3.88363e+06	3.86747e+06	3.95889e+06	4.05536e+06	4.2531e+06	4.31609e+06	4.40364e+06	4.42596e+06	4.43746e+06	4.50904e+06	4.57868e+06	4.76405e+06	4.96234e+06
286	HS	1	68	NA	1.2931e+06	1.21868e+06	1.18243e+06	1.17376e+06	1.17098e+06	1.21371e+06	1.2281e+06	1.21881e+06	1.22649e+06	1.33319e+06	1.32011e+06	1.36185e+06	1.40412e+06	1.45649e+06	1.52511e+06	1.64468e+06	1.6691e+06	1.76038e+06	1.83618e+06	2.00058e+06	2.12366e+06	2.25612e+06	2.42832e+06	2.57611e+06	2.67536e+06	2.73845e+06	2.79501e+06	2.92314e+06	2.97639e+06	3.0239e+06	3.13167e+06	3.26963e+06	3.38071e+06	3.4861e+06	3.66121e+06	3.83091e+06	4.03036e+06	4.16606e+06	4.11268e+06	4.06518e+06	4.09442e+06	4.1362e+06	4.24141e+06	4.36621e+06	4.64862e+06
287	HS	2	59	NA	1.43334e+06	1.34231e+06	1.23348e+06	1.2822e+06	1.21942e+06	1.2592e+06	1.2704e+06	1.2815e+06	1.32373e+06	1.40004e+06	1.43894e+06	1.47065e+06	1.48913e+06	1.56354e+06	1.61602e+06	1.73799e+06	1.80389e+06	1.90875e+06	2.01485e+06	2.141e+06	2.31758e+06	2.47196e+06	2.64699e+06	2.82786e+06	2.96574e+06	2.98672e+06	3.06157e+06	3.19609e+06	3.28424e+06	3.3041e+06	3.40904e+06	3.55048e+06	3.70711e+06	3.79586e+06	4.02308e+06	4.24606e+06	4.45742e+06	4.54149e+06	4.54772e+06	4.50425e+06	4.44115e+06	4.51828e+06	4.63434e+06	4.77913e+06	5.11323e+06
288	HS	1	63	NA	1.48691e+06	1.37964e+06	1.39732e+06	1.33291e+06	1.31401e+06	1.33259e+06	1.38159e+06	1.42921e+06	1.47282e+06	1.47199e+06	1.51902e+06	1.54354e+06	1.63438e+06	1.65118e+06	1.76183e+06	1.85476e+06	1.89842e+06	1.99639e+06	2.16077e+06	2.29675e+06	2.45717e+06	2.62461e+06	2.80493e+06	2.91614e+06	3.0194e+06	3.09904e+06	3.22136e+06	3.36595e+06	3.47134e+06	3.54126e+06	3.61024e+06	3.75374e+06	3.95691e+06	4.00643e+06	4.10549e+06	4.36183e+06	4.50071e+06	4.63798e+06	4.69728e+06	4.70739e+06	4.66556e+06	4.64636e+06	4.82196e+06	5.0033e+06	5.2281e+06
289	HS	2	65	NA	1.52572e+06	1.43345e+06	1.40383e+06	1.39842e+06	1.40779e+06	1.38672e+06	1.39869e+06	1.43484e+06	1.48209e+06	1.51455e+06	1.56571e+06	1.57994e+06	1.63179e+06	1.69966e+06	1.81203e+06	1.91757e+06	1.99451e+06	2.04703e+06	2.24357e+06	2.38259e+06	2.54842e+06	2.65436e+06	2.87511e+06	3.03335e+06	3.1516e+06	3.24304e+06	3.3447e+06	3.42265e+06	3.60675e+06	3.65772e+06	3.74796e+06	3.94589e+06	4.06342e+06	4.1598e+06	4.26658e+06	4.55509e+06	4.75003e+06	4.80642e+06	4.81174e+06	4.80695e+06	4.81334e+06	4.83277e+06	4.92221e+06	5.12035e+06	5.3871e+06
290	HS	1	80	NA	1.3282e+06	1.31141e+06	1.23296e+06	1.22559e+06	1.22874e+06	1201963	1.22535e+06	1.25043e+06	1.28585e+06	1.34021e+06	1.39475e+06	1.44012e+06	1.41661e+06	1.51811e+06	1.65541e+06	1.65043e+06	1.74353e+06	1.80808e+06	1.96678e+06	2.09069e+06	2.19301e+06	2.32034e+06	2.45789e+06	2.7e+06	2.78793e+06	2.83851e+06	2.95569e+06	3.12042e+06	3.18805e+06	3.30384e+06	3.3521e+06	3.48642e+06	3.6437e+06	3.66836e+06	3.79617e+06	3.98247e+06	4.15088e+06	4.31374e+06	4.33318e+06	4.25964e+06	4.28569e+06	4.31033e+06	4.45095e+06	4.60536e+06	4.74515e+06
291	HS	1	72	NA	1.38981e+06	1.31709e+06	1.25439e+06	1.23208e+06	1.18644e+06	1.29041e+06	1.25746e+06	1.28924e+06	1.32715e+06	1.34876e+06	1.39148e+06	1.41229e+06	1.48259e+06	1.5288e+06	1.6135e+06	1.70899e+06	1.79919e+06	1.85855e+06	2.00062e+06	2.13723e+06	2.2824e+06	2.43733e+06	2.53485e+06	2.68946e+06	2.80764e+06	2.83093e+06	2.9499e+06	3.05164e+06	3.26271e+06	3.31882e+06	3.403e+06	3.54783e+06	3.7069e+06	3.75004e+06	3.90275e+06	4.12746e+06	4.28832e+06	4.3766e+06	4.38834e+06	4.31151e+06	4.29345e+06	4.31759e+06	4.4325e+06	4.62536e+06	4.88802e+06
292	HS	2	67	NA	1.4235e+06	1.33386e+06	1.25863e+06	1.29443e+06	1.29114e+06	1.31429e+06	1.35013e+06	1.3868e+06	1.36504e+06	1.41667e+06	1.47852e+06	1.51606e+06	1.56824e+06	1.63039e+06	1.75288e+06	1.8127e+06	1.79942e+06	1.91111e+06	2.05527e+06	2.21636e+06	2.34944e+06	2.41309e+06	2.60131e+06	2.71382e+06	2.8738e+06	2.90808e+06	3.02581e+06	3.2186e+06	3.34648e+06	3.43238e+06	3.4854e+06	3.61265e+06	3.76463e+06	3.79547e+06	3.86555e+06	4.07093e+06	4.26916e+06	4.29821e+06	4.3699e+06	4.36601e+06	4.3417e+06	4.39119e+06	4.49917e+06	4.68206e+06	4.93205e+06
293	HS	1	71	NA	1.39239e+06	1.37102e+06	1.2531e+06	1.25844e+06	1.29087e+06	1.25302e+06	1.36607e+06	1.30416e+06	1.39374e+06	1.37494e+06	1.41669e+06	1.48352e+06	1.53074e+06	1.60169e+06	1.62641e+06	1.74509e+06	1.80061e+06	1.91056e+06	2.05827e+06	2.16616e+06	2.25214e+06	2.35312e+06	2.58409e+06	2.66785e+06	2.80487e+06	2.85709e+06	2.93468e+06	3.15391e+06	3.2993e+06	3.38107e+06	3.48053e+06	3.69826e+06	3.79506e+06	3.82352e+06	3.89178e+06	4.05278e+06	4.32261e+06	4.34916e+06	4.45189e+06	4.43467e+06	4.43211e+06	4.51832e+06	4.62681e+06	4.71301e+06	4.98853e+06
294	HS	1	71	NA	1.40492e+06	1.41847e+06	1.38322e+06	1.28304e+06	1.29641e+06	1.36516e+06	1.34622e+06	1.31032e+06	1.41751e+06	1.41207e+06	1.4393e+06	1.44763e+06	1.57e+06	1.57784e+06	1.71329e+06	1.77339e+06	1.8177e+06	1.90373e+06	2.01079e+06	2.17078e+06	2.32289e+06	2.47469e+06	2.60593e+06	2.75515e+06	2.86574e+06	2.94597e+06	3.06474e+06	3.24072e+06	3.34498e+06	3.44476e+06	3.53048e+06	3.69801e+06	3.83145e+06	3.82455e+06	3.9422e+06	4.09142e+06	4.27416e+06	4.44506e+06	4.46241e+06	4.53344e+06	4.47648e+06	4.51746e+06	4.59209e+06	4.80391e+06	4.98797e+06
295	HS	2	67	NA	1.4446e+06	1.3941e+06	1.30479e+06	1.32297e+06	1.35106e+06	1.31753e+06	1.3189e+06	1.37947e+06	1.38276e+06	1.44184e+06	1.45745e+06	1.49011e+06	1.55571e+06	1.61356e+06	1.69777e+06	1.78331e+06	1.78928e+06	1.94123e+06	2.045e+06	2.23053e+06	2.37611e+06	2.51489e+06	2.70179e+06	2.87129e+06	3.00614e+06	3.06357e+06	3.18224e+06	3.31784e+06	3.4019e+06	3.43729e+06	3.55777e+06	3.67087e+06	3.8672e+06	3.92764e+06	4.03536e+06	4.23413e+06	4.53633e+06	4.66095e+06	4.6141e+06	4.64643e+06	4.54116e+06	4.62424e+06	4.74731e+06	4.90523e+06	5.10415e+06
296	HS	2	76	NA	1.49157e+06	1.40581e+06	1.29392e+06	1.32873e+06	1.28395e+06	1.3477e+06	1.31552e+06	1.38398e+06	1.4259e+06	1.4577e+06	1.53338e+06	1.5177e+06	1.55981e+06	1.61284e+06	1.68961e+06	1.79811e+06	1.88449e+06	1.96874e+06	2.04435e+06	2.18704e+06	2.28154e+06	2.43675e+06	2.56473e+06	2.64715e+06	2.81878e+06	2.91692e+06	2.96446e+06	3.13531e+06	3.35368e+06	3.398e+06	3.47443e+06	3.59447e+06	3.69924e+06	3.75084e+06	3.83486e+06	3.97613e+06	4.10888e+06	4.24573e+06	4.25662e+06	4.30568e+06	4.37265e+06	4.40242e+06	4.49552e+06	4.64839e+06	4.864e+06
297	CENTOS	1	70	NA	1.48788e+06	1.42136e+06	1.39726e+06	1.42719e+06	1.36995e+06	1.4237e+06	1.44709e+06	1.36684e+06	1.47672e+06	1.57589e+06	1.49597e+06	1.63281e+06	1.63515e+06	1.73255e+06	1.75213e+06	1.86171e+06	1.94249e+06	2.00689e+06	2.13588e+06	2.34429e+06	2.4591e+06	2.57711e+06	2.63299e+06	2.70208e+06	2.88027e+06	2.9882e+06	3.12109e+06	3.3701e+06	3.46957e+06	3.55673e+06	3.63632e+06	3.81292e+06	3.9577e+06	4.01092e+06	3.96909e+06	4.14197e+06	4.34747e+06	4.40618e+06	4.51818e+06	4.58671e+06	4.54344e+06	4.60946e+06	4.71362e+06	4.83525e+06	5.06123e+06
298	CENTOS	2	79	NA	1.4003e+06	1.35067e+06	1.29247e+06	1.31758e+06	1.27616e+06	1.33077e+06	1.34471e+06	1.37495e+06	1.33917e+06	1.38951e+06	1.42972e+06	1.50442e+06	1.57845e+06	1.58449e+06	1.65195e+06	1.78193e+06	1.8226e+06	1.94503e+06	2.00871e+06	2.12336e+06	2.28468e+06	2.403e+06	2.6035e+06	2.77036e+06	2.88486e+06	2.91387e+06	3.02302e+06	3.13372e+06	3.20431e+06	3.27614e+06	3.38009e+06	3.51041e+06	3.58948e+06	3.67615e+06	3.79591e+06	3.98996e+06	4.12653e+06	4.23642e+06	4.25722e+06	4.24162e+06	4.27825e+06	4.254e+06	4.35571e+06	4.52426e+06	4.73469e+06
299	CENTOS	2	72	NA	1.39765e+06	1.32332e+06	1.28227e+06	1.27391e+06	1.30704e+06	1.31857e+06	1.28666e+06	1.28357e+06	1.4451e+06	1.39154e+06	1.45199e+06	1.51011e+06	1.44522e+06	1.55671e+06	1.6458e+06	1.7167e+06	1.77612e+06	1.86778e+06	2.01183e+06	2.14211e+06	2.19173e+06	2.36192e+06	2.5218e+06	2.59394e+06	2.79055e+06	2.80999e+06	2.88591e+06	3.11986e+06	3.18992e+06	3.21805e+06	3.36068e+06	3.47025e+06	3.58531e+06	3.68229e+06	3.73132e+06	3.8656e+06	4.02899e+06	4.20446e+06	4.28519e+06	4.24028e+06	4.28294e+06	4.26109e+06	4.36427e+06	4.54568e+06	4.74672e+06
300	CENTOS	2	59	NA	1.52215e+06	1.48057e+06	1.4349e+06	1.35466e+06	1.42024e+06	1.42407e+06	1.49259e+06	1.44691e+06	1.45814e+06	1.55049e+06	1.56337e+06	1.60446e+06	1.6704e+06	1.74233e+06	1.79852e+06	1.86396e+06	1.96682e+06	2.03978e+06	2.15642e+06	2.35696e+06	2.52942e+06	2.66389e+06	2.84253e+06	3.09267e+06	3.18217e+06	3.24797e+06	3.36291e+06	3.48067e+06	3.58339e+06	3.59595e+06	3.71244e+06	3.88649e+06	4.07236e+06	4.14837e+06	4.28084e+06	4.4869e+06	4.69468e+06	4.84254e+06	4.84017e+06	4.85661e+06	4.8184e+06	4.86599e+06	4.91891e+06	5.19334e+06	5.42038e+06
301	CENTOS	1	58	NA	1.351e+06	1.29732e+06	1.21092e+06	1.22185e+06	1.17951e+06	1.19738e+06	1.23406e+06	1.25457e+06	1.32064e+06	1.32295e+06	1.34899e+06	1.39662e+06	1.39496e+06	1.47188e+06	1.58016e+06	1.65816e+06	1.77523e+06	1.83645e+06	1.95305e+06	2.04351e+06	2.16887e+06	2.31419e+06	2.37183e+06	2.56173e+06	2.58865e+06	2.69382e+06	2.8135e+06	3.02507e+06	3.16678e+06	3.20679e+06	3.33539e+06	3.51517e+06	3.6173e+06	3.62925e+06	3.67019e+06	3.79453e+06	3.94586e+06	4.1306e+06	4.22388e+06	4.26035e+06	4.26375e+06	4.31265e+06	4.36478e+06	4.50749e+06	4.6678e+06
302	CENTOS	2	55	NA	1.42404e+06	1.43152e+06	1.41538e+06	1.3977e+06	1.37231e+06	1.42533e+06	1.43409e+06	1.43776e+06	1.45163e+06	1.50112e+06	1.5406e+06	1.62967e+06	1.66076e+06	1.70697e+06	1.75483e+06	1.90907e+06	1.98602e+06	2.08105e+06	2.16158e+06	2.28256e+06	2.39581e+06	2.60935e+06	2.74041e+06	3.00377e+06	3.09352e+06	3.20526e+06	3.24008e+06	3.41052e+06	3.56298e+06	3.59781e+06	3.61498e+06	3.78459e+06	3.97957e+06	4.0046e+06	4.13464e+06	4.31329e+06	4.51944e+06	4.63094e+06	4.68232e+06	4.69272e+06	4.69898e+06	4.70984e+06	4.77142e+06	5.01177e+06	5.28828e+06
303	CENTOS	2	84	NA	1.42682e+06	1.31871e+06	1.25881e+06	1.2666e+06	1.29063e+06	1.2923e+06	1.25457e+06	1.33818e+06	1.32048e+06	1.36911e+06	1.35845e+06	1.43932e+06	1.47601e+06	1.56286e+06	1.65858e+06	1.73191e+06	1.79209e+06	1.85687e+06	1.96291e+06	2.12238e+06	2.31137e+06	2.37269e+06	2.51517e+06	2.68409e+06	2.74987e+06	2.85005e+06	2.96562e+06	3.10615e+06	3.2426e+06	3.31011e+06	3.46165e+06	3.60177e+06	3.72304e+06	3.78801e+06	3.89609e+06	4.11428e+06	4.3199e+06	4.40714e+06	4.34949e+06	4.36622e+06	4.32088e+06	4.37324e+06	4.46596e+06	4.64088e+06	4.85168e+06
304	CENTOS	1	77	NA	1.2175e+06	1.20056e+06	1.16657e+06	1.12607e+06	1.14215e+06	1.12713e+06	1.15008e+06	1.14226e+06	1.21634e+06	1.23256e+06	1.27216e+06	1.32625e+06	1.34928e+06	1.36476e+06	1.48295e+06	1.57013e+06	1.67877e+06	1.7135e+06	1.90819e+06	1.99907e+06	2.14363e+06	2.16882e+06	2.23113e+06	2.36082e+06	2.46617e+06	2.56425e+06	2.67867e+06	2.85336e+06	3.00425e+06	3.11709e+06	3.1853e+06	3.31723e+06	3.48514e+06	3.50623e+06	3.59386e+06	3.73488e+06	3.89462e+06	4.00644e+06	4.02243e+06	4.00819e+06	3.99946e+06	4.01279e+06	4.16321e+06	4.28674e+06	4.47542e+06
305	CENTOS	2	65	NA	1.43689e+06	1.37345e+06	1.36591e+06	1.29564e+06	1.27146e+06	1.29669e+06	1.3223e+06	1.37318e+06	1.42922e+06	1.47609e+06	1.56416e+06	1.53051e+06	1.60704e+06	1.64129e+06	1.75531e+06	1.85378e+06	1.91232e+06	2.00893e+06	2.14891e+06	2.25838e+06	2.41939e+06	2.5386e+06	2.70108e+06	2.87357e+06	3.04122e+06	3.06759e+06	3.15113e+06	3.24701e+06	3.39906e+06	3.39084e+06	3.48252e+06	3.65319e+06	3.83118e+06	3.90802e+06	4.15097e+06	4.31585e+06	4.46935e+06	4.5887e+06	4.58356e+06	4.57068e+06	4.54314e+06	4.56127e+06	4.73371e+06	4.92346e+06	5.13032e+06
306	CENTOS	2	89	NA	1.28428e+06	1.20794e+06	1.17329e+06	1.10141e+06	1.15363e+06	1.16747e+06	1.17705e+06	1.20848e+06	1.29131e+06	1.30211e+06	1.31488e+06	1.31981e+06	1.37991e+06	1.45705e+06	1.51009e+06	1.60776e+06	1.66431e+06	1.69258e+06	1.78765e+06	1.93906e+06	2.06301e+06	2.21351e+06	2.37668e+06	2.51309e+06	2.60528e+06	2.69426e+06	2.77546e+06	2.86072e+06	2.98029e+06	3.06363e+06	3.08654e+06	3.22941e+06	3.37272e+06	3.37588e+06	3.53096e+06	3.74007e+06	3.92509e+06	3.9994e+06	4.06655e+06	4.0864e+06	4.10091e+06	4.0498e+06	4.14613e+06	4.32784e+06	4.56698e+06
307	CENTOS	2	66	NA	1.55651e+06	1.49037e+06	1.42743e+06	1.3643e+06	1.35683e+06	1.44331e+06	1.43777e+06	1.43042e+06	1.52732e+06	1.55031e+06	1.58577e+06	1.65108e+06	1.65547e+06	1.73041e+06	1.80153e+06	1.95419e+06	1.97499e+06	2.06403e+06	2.16735e+06	2.29944e+06	2.45277e+06	2.52082e+06	2.70359e+06	2.88601e+06	2.97578e+06	3.04902e+06	3.19165e+06	3.34516e+06	3.50003e+06	3.55318e+06	3.64771e+06	3.82829e+06	3.90034e+06	3.98596e+06	4.03843e+06	4.25538e+06	4.47505e+06	4.56159e+06	4.59387e+06	4.60315e+06	4.6249e+06	4.61188e+06	4.6824e+06	4.89368e+06	5.13048e+06
308	CENTOS	1	63	NA	1.32832e+06	1.2608e+06	1.18795e+06	1.1975e+06	1.17434e+06	1.18152e+06	1.2228e+06	1.2179e+06	1.26371e+06	1.30591e+06	1.37122e+06	1.36822e+06	1.42477e+06	1.45328e+06	1.52748e+06	1.59528e+06	1.67231e+06	1.72631e+06	1.88706e+06	2.08269e+06	2.18509e+06	2.2863e+06	2.42711e+06	2.52199e+06	2.66133e+06	2.71236e+06	2.86042e+06	3.05056e+06	3.25013e+06	3.28772e+06	3.34019e+06	3.54618e+06	3.70978e+06	3.71537e+06	3.75702e+06	3.91638e+06	4.11419e+06	4.24629e+06	4.31965e+06	4.2795e+06	4.27304e+06	4.3399e+06	4.45378e+06	4.59694e+06	4.82481e+06
309	CENTOS	1	78	NA	1.38849e+06	1.30813e+06	1.34644e+06	1.24467e+06	1.25599e+06	1.33122e+06	1.31599e+06	1.32788e+06	1.38075e+06	1.39942e+06	1.45501e+06	1.48692e+06	1.49009e+06	1.51368e+06	1.65407e+06	1.69688e+06	1.78197e+06	1.88133e+06	2.04038e+06	2.10267e+06	2.21772e+06	2.42549e+06	2.5932e+06	2.75119e+06	2.89947e+06	2.89073e+06	2.99206e+06	3.11151e+06	3.20086e+06	3.25003e+06	3.32598e+06	3.43952e+06	3.63999e+06	3.69751e+06	3.81728e+06	4.00712e+06	4.24982e+06	4.30517e+06	4.33654e+06	4.36717e+06	4.39605e+06	4.32172e+06	4.50901e+06	4.61571e+06	4.8361e+06
310	CENTOS	2	74	NA	1.39453e+06	1.36387e+06	1.36008e+06	1.30107e+06	1.28315e+06	1.32044e+06	1.37364e+06	1.39321e+06	1.39954e+06	1.38558e+06	1.42793e+06	1.52709e+06	1.60343e+06	1.69456e+06	1.77703e+06	1.80418e+06	1.89103e+06	2.01385e+06	2.11197e+06	2.24501e+06	2.45371e+06	2.55249e+06	2.70294e+06	2.86274e+06	3.06864e+06	3.08127e+06	3.18017e+06	3.29745e+06	3.48801e+06	3.51916e+06	3.65568e+06	3.78861e+06	3.89849e+06	4.00822e+06	4.13188e+06	4.3753e+06	4.57367e+06	4.66734e+06	4.68581e+06	4.5915e+06	4.65809e+06	4.59805e+06	4.76579e+06	4.95808e+06	5.18215e+06
311	CENTOS	1	84	NA	1.32392e+06	1.27578e+06	1.21667e+06	1.22382e+06	1.18696e+06	1.20934e+06	1.19723e+06	1.28221e+06	1.29104e+06	1.35461e+06	1.34391e+06	1.42055e+06	1.50094e+06	1.53169e+06	1.54317e+06	1.66552e+06	1.7347e+06	1.80135e+06	1.92677e+06	2.04474e+06	2.17563e+06	2.35491e+06	2.57087e+06	2.69313e+06	2.85263e+06	2.89119e+06	2.99153e+06	3.08922e+06	3.19166e+06	3.20519e+06	3.28356e+06	3.38833e+06	3.55349e+06	3.65896e+06	3.7706e+06	4.02537e+06	4.20977e+06	4.29065e+06	4.31463e+06	4.36399e+06	4.34021e+06	4.32782e+06	4.47161e+06	4.62696e+06	4.88788e+06
312	CENTOS	1	78	NA	1.42297e+06	1.37667e+06	1.34001e+06	1.27478e+06	1.33189e+06	1.35721e+06	1.35979e+06	1.37895e+06	1.44189e+06	1.45385e+06	1.50356e+06	1.55974e+06	1.62126e+06	1.69981e+06	1.71413e+06	1.80146e+06	1.91619e+06	2.02251e+06	2.1037e+06	2.21167e+06	2.37557e+06	2.49526e+06	2.70745e+06	2.88158e+06	3.01855e+06	3.1062e+06	3.17525e+06	3.32264e+06	3.49171e+06	3.5114e+06	3.65146e+06	3.71761e+06	3.93798e+06	3.976e+06	4.12039e+06	4.2699e+06	4.44337e+06	4.60049e+06	4.63453e+06	4.63582e+06	4.61016e+06	4.65101e+06	4.77867e+06	4.92004e+06	5.17124e+06
313	CENTOS	1	63	NA	1.32044e+06	1.28118e+06	1.26086e+06	1.27087e+06	1.23618e+06	1.28402e+06	1.28845e+06	1.27406e+06	1.34172e+06	1.35915e+06	1.39103e+06	1.42192e+06	1.47102e+06	1.55316e+06	1.63451e+06	1.67552e+06	1.72495e+06	1.83456e+06	1.92979e+06	2.09767e+06	2.21471e+06	2.39917e+06	2.63459e+06	2.76637e+06	2.82742e+06	2.93577e+06	2.99726e+06	3.10037e+06	3.16409e+06	3.28372e+06	3.35805e+06	3.47793e+06	3.63012e+06	3.71951e+06	3.83069e+06	4.02823e+06	4.22377e+06	4.33059e+06	4.36439e+06	4.33602e+06	4.37771e+06	4.39818e+06	4.47599e+06	4.63206e+06	4.82717e+06
314	CENTOS	1	72	NA	1.45331e+06	1.4184e+06	1.36377e+06	1.37685e+06	1.33804e+06	1.33043e+06	1.32656e+06	1.3804e+06	1.43727e+06	1.39575e+06	1.50054e+06	1.50038e+06	1.58999e+06	1.64193e+06	1.73771e+06	1.79976e+06	1.87636e+06	2.00498e+06	2.08563e+06	2.1455e+06	2.32083e+06	2.40093e+06	2.56175e+06	2.71884e+06	2.89045e+06	2.94093e+06	3.03615e+06	3.17764e+06	3.27524e+06	3.32783e+06	3.46167e+06	3.68326e+06	3.76245e+06	3.79777e+06	3.86691e+06	4.16096e+06	4.29666e+06	4.45041e+06	4.5057e+06	4.53737e+06	4.53065e+06	4.54023e+06	4.62468e+06	4.88306e+06	5.05802e+06
315	CENTOS	2	73	NA	1.45531e+06	1.36665e+06	1.27799e+06	1.31913e+06	1.30042e+06	1.36688e+06	1.40877e+06	1.42989e+06	1.44798e+06	1.49039e+06	1.46427e+06	1.55042e+06	1.60999e+06	1.67904e+06	1.75593e+06	1.83271e+06	1.90623e+06	1.97113e+06	2.096e+06	2.30221e+06	2.41065e+06	2.55861e+06	2.76256e+06	2.91138e+06	2.96694e+06	3.06287e+06	3.18509e+06	3.30892e+06	3.38089e+06	3.42406e+06	3.57137e+06	3.77863e+06	3.87268e+06	3.98428e+06	4.06148e+06	4.31921e+06	4.50809e+06	4.57762e+06	4.60321e+06	4.57984e+06	4.56308e+06	4.57073e+06	4.6764e+06	4.92478e+06	5.19224e+06
316	CENTOS	2	67	NA	1.39788e+06	1.32098e+06	1.28957e+06	1.25187e+06	1.24631e+06	1.25439e+06	1.28484e+06	1.30178e+06	1.29559e+06	1.31422e+06	1.39786e+06	1.40589e+06	1.46804e+06	1.54876e+06	1.59592e+06	1.6486e+06	1.77001e+06	1.84326e+06	1.98027e+06	2.10852e+06	2.27879e+06	2.37605e+06	2.57303e+06	2.7752e+06	2.89312e+06	2.92174e+06	3.00963e+06	3.04983e+06	3.19951e+06	3.26654e+06	3.34042e+06	3.49328e+06	3.64645e+06	3.68469e+06	3.80686e+06	4.01225e+06	4.25012e+06	4.33725e+06	4.38379e+06	4.38196e+06	4.30714e+06	4.29277e+06	4.42024e+06	4.64047e+06	4.87954e+06
317	CENTOS	2	74	NA	1.21539e+06	1.16182e+06	1.12452e+06	1.10231e+06	1.13243e+06	1.06031e+06	1.13614e+06	1.16285e+06	1.22854e+06	1.1892e+06	1.20392e+06	1.33473e+06	1.32449e+06	1.33447e+06	1.47957e+06	1.53423e+06	1.52393e+06	1.65376e+06	1.70725e+06	1.87306e+06	1.97892e+06	2.10228e+06	2.15994e+06	2.29431e+06	2.43915e+06	2.48937e+06	2.59415e+06	2.74361e+06	2.92245e+06	2.88284e+06	2.97698e+06	3.1552e+06	3.28502e+06	3.31101e+06	3.34414e+06	3.50273e+06	3.67643e+06	3.81173e+06	3.77765e+06	3.81555e+06	3.78494e+06	3.85057e+06	3.93796e+06	4.0672e+06	4.23298e+06
318	CENTOS	2	71	NA	1.40252e+06	1.36612e+06	1.28458e+06	1.27506e+06	1.24704e+06	1.2499e+06	1.2584e+06	1.3591e+06	1.29252e+06	1.32197e+06	1.3875e+06	1.4757e+06	1.51293e+06	1.56907e+06	1.61847e+06	1.69528e+06	1.74243e+06	1.79823e+06	1.95542e+06	2.06722e+06	2.22064e+06	2.39724e+06	2.50605e+06	2.67976e+06	2.80124e+06	2.848e+06	2.95057e+06	3.0103e+06	3.08262e+06	3.15194e+06	3.25965e+06	3.3447e+06	3.49027e+06	3.60775e+06	3.75353e+06	4.05367e+06	4.20152e+06	4.27661e+06	4.23271e+06	4.2527e+06	4.24082e+06	4.24388e+06	4.36133e+06	4.55848e+06	4.74779e+06
319	CENTOS	2	76	NA	1.27642e+06	1.28389e+06	1.222e+06	1.1481e+06	1.18494e+06	1.16086e+06	1.19284e+06	1.16259e+06	1.29482e+06	1.30198e+06	1.3224e+06	1.38979e+06	1.38927e+06	1.45664e+06	1.5405e+06	1.62956e+06	1.6706e+06	1.76263e+06	1.87488e+06	1.96457e+06	2.15576e+06	2.23447e+06	2.36769e+06	2.43558e+06	2.57709e+06	2.68787e+06	2.81296e+06	2.92978e+06	3.05651e+06	3.15208e+06	3.26961e+06	3.40153e+06	3.47353e+06	3.57753e+06	3.58716e+06	3.75276e+06	3.89348e+06	3.98149e+06	4.05474e+06	4.08073e+06	4.0392e+06	4.0656e+06	4.21501e+06	4.36836e+06	4.53474e+06
320	CENTOS	2	63	NA	1.3034e+06	1.25909e+06	1.21882e+06	1.24438e+06	1.17554e+06	1.18097e+06	1.2344e+06	1.24483e+06	1.30102e+06	1.32986e+06	1.35285e+06	1.31526e+06	1.40496e+06	1.4739e+06	1.55567e+06	1.65418e+06	1.67346e+06	1.82524e+06	1.86496e+06	2.05588e+06	2.12546e+06	2.3572e+06	2.47005e+06	2.5454e+06	2.71e+06	2.77892e+06	2.90862e+06	3.00927e+06	3.16686e+06	3.18035e+06	3.33556e+06	3.45443e+06	3.64175e+06	3.72032e+06	3.71636e+06	3.94656e+06	4.13956e+06	4.28247e+06	4.2677e+06	4.22687e+06	4.27751e+06	4.24318e+06	4.37162e+06	4.55984e+06	4.75986e+06
321	CENTOS	2	70	NA	1.24287e+06	1.22305e+06	1.22085e+06	1.16278e+06	1.2092e+06	1.18595e+06	1.22159e+06	1.20665e+06	1.24672e+06	1.3017e+06	1.29548e+06	1.38846e+06	1.40932e+06	1.45115e+06	1.55381e+06	1.58449e+06	1.68008e+06	1.75493e+06	1.88372e+06	1.9499e+06	2.11062e+06	2.22308e+06	2.38728e+06	2.52998e+06	2.64469e+06	2.72977e+06	2.81553e+06	2.95701e+06	3.03254e+06	3.06955e+06	3.22372e+06	3.366e+06	3.41138e+06	3.47759e+06	3.58968e+06	3.77345e+06	3.9267e+06	4.06746e+06	4.05389e+06	4.1094e+06	4.02858e+06	4.08718e+06	4.19996e+06	4.30659e+06	4.54476e+06
322	CENTOS	1	68	NA	1.36632e+06	1.38127e+06	1.29729e+06	1.2846e+06	1.29095e+06	1.28503e+06	1.26035e+06	1.32068e+06	1.34396e+06	1.4232e+06	1.40981e+06	1.47314e+06	1.5118e+06	1.52334e+06	1.61406e+06	1.68289e+06	1.83357e+06	1.87356e+06	2.02891e+06	2.17167e+06	2.28184e+06	2.31024e+06	2.50529e+06	2.58434e+06	2.68313e+06	2.79662e+06	2.93357e+06	3.1244e+06	3.29368e+06	3.378e+06	3.46058e+06	3.60945e+06	3.72051e+06	3.79368e+06	3.80261e+06	3.9783e+06	4.09026e+06	4.23898e+06	4.27389e+06	4.28158e+06	4.32217e+06	4.39843e+06	4.43342e+06	4.62015e+06	4.87376e+06
323	CENTOS	2	72	NA	1.46434e+06	1.38558e+06	1.34746e+06	1.33813e+06	1.35027e+06	1.37627e+06	1.34459e+06	1.40064e+06	1.45158e+06	1.52344e+06	1.54394e+06	1.62246e+06	1.63409e+06	1.75892e+06	1.82001e+06	1.87983e+06	1.94547e+06	2.07232e+06	2.15387e+06	2.32258e+06	2.48161e+06	2.57254e+06	2.80171e+06	3.00258e+06	3.20305e+06	3.24775e+06	3.29812e+06	3.3335e+06	3.4877e+06	3.61507e+06	3.60934e+06	3.72934e+06	3.95923e+06	3.9798e+06	4.13429e+06	4.33445e+06	4.61198e+06	4.72484e+06	4.68235e+06	4.65943e+06	4.71277e+06	4.71945e+06	4.82362e+06	5.00494e+06	5.26805e+06
324	CENTOS	2	56	NA	1.26465e+06	1.21021e+06	1.18264e+06	1.2134e+06	1.173e+06	1.20565e+06	1.20368e+06	1.24549e+06	1.27548e+06	1.31046e+06	1.34732e+06	1.37744e+06	1.43195e+06	1.46173e+06	1.56588e+06	1.62735e+06	1.723e+06	1.77697e+06	1.88408e+06	2.04892e+06	2.15523e+06	2.26811e+06	2.3701e+06	2.43404e+06	2.59524e+06	2.676e+06	2.82308e+06	2.95708e+06	3.14106e+06	3.14263e+06	3.29661e+06	3.3913e+06	3.52488e+06	3.53871e+06	3.5555e+06	3.74568e+06	3.94693e+06	4.0529e+06	4.02853e+06	4.14345e+06	4.104e+06	4.10348e+06	4.25504e+06	4.36987e+06	4.53853e+06
325	CENTOS	1	75	NA	1.4006e+06	1.40072e+06	1.36502e+06	1.35634e+06	1.30877e+06	1.32032e+06	1.33215e+06	1.36853e+06	1.41015e+06	1.45571e+06	1.48415e+06	1.56942e+06	1.61598e+06	1.63666e+06	1.7135e+06	1.78009e+06	1.8921e+06	1.96093e+06	2.00968e+06	2.19105e+06	2.32911e+06	2.43367e+06	2.6479e+06	2.78854e+06	2.97711e+06	2.98403e+06	3.08541e+06	3.22968e+06	3.2867e+06	3.3732e+06	3.45857e+06	3.60639e+06	3.70283e+06	3.74672e+06	3.83992e+06	4.08627e+06	4.31318e+06	4.34327e+06	4.37434e+06	4.41447e+06	4.32853e+06	4.40898e+06	4.52412e+06	4.64873e+06	4.89062e+06
326	CENTOS	1	76	NA	1.32886e+06	1.21022e+06	1.22317e+06	1.23295e+06	1.21081e+06	1.24778e+06	1.24444e+06	1.24826e+06	1.27729e+06	1.3512e+06	1.35488e+06	1.42578e+06	1.45086e+06	1.54783e+06	1.59151e+06	1.69697e+06	1.76646e+06	1.80658e+06	1.90347e+06	2.07059e+06	2.1869e+06	2.30591e+06	2.50031e+06	2.71294e+06	2.7761e+06	2.87586e+06	2.89136e+06	3.04649e+06	3.12629e+06	3.12841e+06	3.21464e+06	3.40838e+06	3.54431e+06	3.59643e+06	3.63869e+06	3.91376e+06	4.10084e+06	4.18688e+06	4.16438e+06	4.13115e+06	4.12953e+06	4.13948e+06	4.22894e+06	4.42875e+06	4.68659e+06
327	CENTOS	2	67	NA	1.3653e+06	1.28529e+06	1.24815e+06	1.20863e+06	1.24564e+06	1.25351e+06	1.23723e+06	1.28007e+06	1.31401e+06	1.4333e+06	1.32759e+06	1.42722e+06	1.46276e+06	1.50853e+06	1.59513e+06	1.68967e+06	1.77023e+06	1.86185e+06	1.95896e+06	2.07587e+06	2.26052e+06	2.37498e+06	2.53492e+06	2.7673e+06	2.83141e+06	2.90389e+06	2.94866e+06	3.11685e+06	3.19713e+06	3.27547e+06	3.31379e+06	3.41202e+06	3.59517e+06	3.69506e+06	3.77353e+06	4.00235e+06	4.20642e+06	4.28921e+06	4.34384e+06	4.30034e+06	4.30165e+06	4.28697e+06	4.41044e+06	4.55335e+06	4.78019e+06
328	CENTOS	2	70	NA	1.34656e+06	1.29422e+06	1.26688e+06	1.21688e+06	1.21665e+06	1.21489e+06	1.31512e+06	1.29759e+06	1.35057e+06	1.39286e+06	1.45396e+06	1.42407e+06	1.51661e+06	1.54609e+06	1.68001e+06	1.73576e+06	1.77546e+06	1.91161e+06	1.98951e+06	2.09178e+06	2.2202e+06	2.38944e+06	2.5257e+06	2.69972e+06	2.8182e+06	2.82994e+06	2.97496e+06	3.07099e+06	3.1873e+06	3.22414e+06	3.33513e+06	3.4595e+06	3.55826e+06	3.67818e+06	3.78291e+06	3.93076e+06	4.09823e+06	4.16755e+06	4.24845e+06	4.18888e+06	4.21554e+06	4.24875e+06	4.31681e+06	4.52552e+06	4.68818e+06
329	CENTOS	2	75	NA	1.2416e+06	1.21796e+06	1.11487e+06	1.06142e+06	1.05112e+06	1.05602e+06	1.06212e+06	1.14743e+06	1.1301e+06	1.15711e+06	1.18995e+06	1.23601e+06	1.2824e+06	1.32252e+06	1.40452e+06	1.48342e+06	1.51006e+06	1.64642e+06	1.68082e+06	1.81214e+06	1.91946e+06	2.02408e+06	2.26714e+06	2.38437e+06	2.50697e+06	2.5771e+06	2.62528e+06	2.77498e+06	2.87408e+06	2.92844e+06	2.99569e+06	3.09908e+06	3.20531e+06	3.26014e+06	3.40742e+06	3.53601e+06	3.71932e+06	3.82036e+06	3.8873e+06	3.87848e+06	3.87914e+06	3.91387e+06	3.96787e+06	4.17025e+06	4.35596e+06
330	CENTOS	2	69	NA	1.36096e+06	1.36535e+06	1.32556e+06	1.23221e+06	1.31593e+06	1.25805e+06	1.31049e+06	1.29583e+06	1.35622e+06	1.3527e+06	1.38749e+06	1.49972e+06	1.53207e+06	1.60563e+06	1.61465e+06	1.74578e+06	1.74473e+06	1.86038e+06	1.9637e+06	2.07746e+06	2.23468e+06	2.30958e+06	2.5068e+06	2.64432e+06	2.71032e+06	2.88958e+06	2.96252e+06	3.08087e+06	3.07131e+06	3.18207e+06	3.23416e+06	3.35041e+06	3.5153e+06	3.55042e+06	3.67074e+06	3.8477e+06	4.04962e+06	4.09756e+06	4.18789e+06	4.16309e+06	4.16545e+06	4.23716e+06	4.30528e+06	4.50219e+06	4.61666e+06
331	CENTOS	2	66	NA	1.397e+06	1.32557e+06	1.25071e+06	1.25701e+06	1.23975e+06	1.23692e+06	1.2882e+06	1.24388e+06	1.36448e+06	1.32604e+06	1.40908e+06	1.40598e+06	1.48574e+06	1.52069e+06	1.60653e+06	1.68427e+06	1.78403e+06	1.802e+06	1.9838e+06	2.12622e+06	2.22787e+06	2.33767e+06	2.47113e+06	2.6453e+06	2.73055e+06	2.80883e+06	2.97139e+06	3.09457e+06	3.21734e+06	3.21984e+06	3.36851e+06	3.47219e+06	3.64596e+06	3.68724e+06	3.73585e+06	3.95055e+06	4.19421e+06	4.28448e+06	4.28281e+06	4.30369e+06	4.28984e+06	4.27355e+06	4.39952e+06	4.54244e+06	4.82526e+06
332	CENTOS	2	72	NA	1.41766e+06	1.23717e+06	1.22457e+06	1.22319e+06	1.23086e+06	1.16514e+06	1.25289e+06	1.22603e+06	1.32867e+06	1.30818e+06	1.34763e+06	1.37235e+06	1.39702e+06	1.50693e+06	1.57198e+06	1.6232e+06	1.68424e+06	1.79799e+06	1.91041e+06	2.0721e+06	2.15928e+06	2.2492e+06	2.32423e+06	2.49934e+06	2.64953e+06	2.74972e+06	2.80133e+06	2.98011e+06	3.10081e+06	3.18304e+06	3.26289e+06	3.41556e+06	3.52384e+06	3.6015e+06	3.6139e+06	3.78755e+06	3.98494e+06	4.08645e+06	4.1006e+06	4.15301e+06	4.18506e+06	4.14034e+06	4.27671e+06	4.36224e+06	4.6026e+06
333	CENTOS	2	73	NA	1.45488e+06	1.43062e+06	1.36647e+06	1.3893e+06	1.34299e+06	1.41295e+06	1.37527e+06	1.3783e+06	1.43992e+06	1.51711e+06	1.51489e+06	1.55864e+06	1.62252e+06	1.6721e+06	1.8211e+06	1.81947e+06	1.9326e+06	2.01704e+06	2.13711e+06	2.30308e+06	2.42549e+06	2.51344e+06	2.69203e+06	2.83511e+06	2.93681e+06	3.03718e+06	3.12019e+06	3.30884e+06	3.47023e+06	3.53096e+06	3.66846e+06	3.7911e+06	3.8476e+06	3.93536e+06	4.0009e+06	4.17309e+06	4.35379e+06	4.47903e+06	4.49968e+06	4.57289e+06	4.56402e+06	4.53962e+06	4.70429e+06	4.8097e+06	5.04299e+06
334	CENTOS	1	59	NA	1.41078e+06	1.43552e+06	1.34786e+06	1.2574e+06	1.26747e+06	1.27866e+06	1.31034e+06	1.35815e+06	1.36937e+06	1.40776e+06	1.48494e+06	1.51063e+06	1.51084e+06	1.61924e+06	1.65861e+06	1.79984e+06	1.86487e+06	1.97156e+06	2.08561e+06	2.19379e+06	2.36018e+06	2.50482e+06	2.59207e+06	2.77757e+06	2.90629e+06	2.98898e+06	3.07883e+06	3.25247e+06	3.38483e+06	3.42784e+06	3.48301e+06	3.64389e+06	3.71002e+06	3.81181e+06	3.89968e+06	4.0731e+06	4.31997e+06	4.3868e+06	4.39059e+06	4.42211e+06	4.37774e+06	4.46254e+06	4.57853e+06	4.7151e+06	4.97007e+06
335	CENTOS	2	71	NA	1.37735e+06	1.34057e+06	1.24814e+06	1.21396e+06	1.2453e+06	1.28212e+06	1.27528e+06	1.32177e+06	1.31331e+06	1.38707e+06	1.44074e+06	1.48311e+06	1.53014e+06	1.559e+06	1.65329e+06	1.74908e+06	1.82939e+06	1.85571e+06	2.00336e+06	2.15782e+06	2.27774e+06	2.40945e+06	2.52183e+06	2.65266e+06	2.7661e+06	2.83215e+06	3.02208e+06	3.10769e+06	3.22158e+06	3.27624e+06	3.43382e+06	3.5557e+06	3.69204e+06	3.68972e+06	3.77946e+06	3.95645e+06	4.10743e+06	4.25351e+06	4.29091e+06	4.28729e+06	4.29623e+06	4.37294e+06	4.46548e+06	4.55817e+06	4.78122e+06
336	CENTOS	2	76	NA	1.38269e+06	1.32074e+06	1.28104e+06	1.26753e+06	1.28113e+06	1.2656e+06	1.28246e+06	1.30671e+06	1.34561e+06	1.42072e+06	1.42052e+06	1.44043e+06	1.47146e+06	1.58227e+06	1.63767e+06	1.69082e+06	1.79456e+06	1.90902e+06	2.05812e+06	2.10489e+06	2.24068e+06	2.42367e+06	2.57193e+06	2.68833e+06	2.80482e+06	2.85627e+06	3.00041e+06	3.08553e+06	3.24674e+06	3.274e+06	3.38309e+06	3.56548e+06	3.67424e+06	3.7533e+06	3.80964e+06	3.95131e+06	4.14319e+06	4.29914e+06	4.3598e+06	4.33337e+06	4.27802e+06	4.38054e+06	4.45298e+06	4.58164e+06	4.8601e+06
[truncated: 339 more rows]
[truncated: 434 more columns]

## Sheet: ADVSCORE
	H&Y	UPDRSI	UPDRSII	UPDRSIII	UPDRSIV	UPDRSsum	BMI	MMSE
654	NA	NA	NA	48	NA	NA	22.7	9
655	3	6	18	23	12	59	28.4	26
656	2.5	4	8	16	1	29	23.7	NA
[truncated: 19 more rows]

## Sheet: DENOVOSCORE
	H.Y	UPDRSI	UPDRSII	UPDRSIII	UPDRSIV	UPDRSsum	BMI	MMSE
[truncated: 233 more rows]
